# Supplementary material for: Integrative omics analysis reveals the genetic basis of fatty acid composition in Brassica napus seeds
Source: Research Square preprint supplement (doi:10.21203/rs.3.rs-5468888/v1), 2025-03-28
Supplement: Supplementary file 1 [file 7f6c2bd186522eaa237ed1a0.xlsx]

## Sheet: ST1
Table S1. Summary of accessions for GWAS and TWAS (DNA sequencing was performed by Tang et al. 2021)
Sample ID	Germplasm name	Origin	Sub Population	Sequencing depth
X2	Ganyou5	Hubei (China)	SW2	8.8
X4	Norin42	Japan	SW2	8.8
X6	Kelina	Chongqing (China)	SW2	9.4
X8	H-6	Japan	SWM	11
X10	Yan81-2	Chongqing (China)	SW2	9.6
X12	28887	Chongqing (China)	SW2	9.4
X14	Qianyou4	Guizhou (China)	SW2	9.5
X16	Qianyou331	Guizhou (China)	SW2	8.9
X18	Enyou73-1-2	Chongqing (China)	SWM	9.7
X20	Niuerduo	Chongqing (China)	Mixed	8.8
X22	880101	Chongqing (China)	SW2	9.5
X24	Swu40	Chongqing (China)	SWM	8.7
X26	Swu42	Chongqing (China)	SW1	8.2
X28	Swu43	Chongqing (China)	SW1	8.9
X30	Swu44	Chongqing (China)	SW1	8.4
X32	Swu45	Chongqing (China)	SW1	8.8
X34	Swu46	Chongqing (China)	SW1	8.3
X36	Swu47	Chongqing (China)	SW1	7.8
X40	Swu48	Chongqing (China)	SW1	9.1
X42	Swu52	Chongqing (China)	SW1	8.2
X44	Swu53	Chongqing (China)	Mixed	9.7
X46	Swu56	Chongqing (China)	SW1	9.7
X48	Swu59	Chongqing (China)	SWM	9.9
X50	Swu65	Chongqing (China)	SW1	8.2
X56	Swu92	Chongqing (China)	SW1	8.6
X60	Swu106	Chongqing (China)	SW1	8.8
X64	Chuanyou20	Sichuan (China)	SW1	7.4
X66	Chuanyou18	Sichuan (China)	SWM	7.1
X70	Cy12Ny-7	Sichuan (China)	SW2	7.3
X72	Cy12Q95406	Sichuan (China)	SWM	7.6
X74	Cy12Q8-7	Sichuan (China)	SWM	7.9
X76	Cy12Qsz06	Sichuan (China)	SWM	8.1
X78	Cy12Qcwh-1	Sichuan (China)	SW1	7.7
X80	Cy12Q95108	Sichuan (China)	SW1	7.5
X82	Cy12Q21535-N3	Sichuan (China)	SWM	8.4
X84	Cy12Pxw-4	Sichuan (China)	SWM	8.1
X86	Cy12Pxw-6	Sichuan (China)	SW1	7.4
X88	Cy12Pxw-9	Sichuan (China)	SW1	7.1
X90	Cy13Pxw-17	Sichuan (China)	SWM	9.1
X92	Cy14Pxw-18	Sichuan (China)	SWM	8.3
X94	Cy15Pxw-31	Sichuan (China)	Mixed	7.9
X96	Cy16Pxw-35	Sichuan (China)	SWM	8.4
X98	Cy17Pxw-58	Sichuan (China)	SWM	8.5
X100	Cy18Pxw-62	Sichuan (China)	SWM	8
X102	Cy19Pxw-65	Sichuan (China)	SWM	8.4
X104	Cy20Pxw-66	Sichuan (China)	SW1	8
X106	Cy21Pxw-84	Sichuan (China)	SW1	8
X108	Cy12Gj-1	Sichuan (China)	SW2	8.1
X110	Wx1025	Hunan (China)	SW1	8.7
X114	Wx10296	Hunan (China)	SW1	8.8
X116	Wx10315	Hunan (China)	SWM	9.3
X118	10-1043	Hunan (China)	SWM	8.4
X120	10-1047	Hunan (China)	SWM	9.1
X122	10-1061	Hunan (China)	SWM	8.4
X124	10-1070	Hunan (China)	SWM	8.9
X126	10-804	Hunan (China)	SWM	9.2
X128	10-1358	Hunan (China)	SWM	8
X130	1472	Hunan (China)	Mixed	7.7
X132	Xiangyou13	Hunan (China)	SWM	8.2
X134	Xiangyou15	Hunan (China)	SW2	9.7
X136	Xiangyou11	Hunan (China)	SW2	9.2
X138	740	Hunan (China)	SWM	9.2
X142	631	Hunan (China)	SWM	9.6
X144	613	Hunan (China)	SW1	8.4
X146	783	Hunan (China)	SWM	9.3
X148	782	Hunan (China)	Mixed	9.6
X150	Yb3	Hunan (China)	SW1	10
X152	1360	Hunan (China)	SW1	8.8
X154	563	Hunan (China)	SWM	8.8
X156	Wx10329	Hunan (China)	SWM	8.3
X158	Santana	German	SW1	8.6
X160	1281	Hunan (China)	SW1	8.7
X162	509	Hunan (China)	Mixed	8.6
X164	1368	Hunan (China)	SWM	7.5
X166	1322	Hunan (China)	SWM	8.8
X168	1252	Hunan (China)	SW1	9.8
X170	1321	Hunan (China)	SW1	8.7
X172	7022	Hubei (China)	SW1	9
X174	7094	Hubei (China)	Mixed	7.4
X176	7016	Hubei (China)	SW1	8.2
X178	9F087	Hubei (China)	SW1	7
X180	97096	Hubei (China)	SW1	7.3
X182	97097	Hubei (China)	SW1	8.2
X184	7189	Hubei (China)	SW1	8
X186	7191	Hubei (China)	SW1	8
X188	7037	Hubei (China)	SW1	8.2
X190	Rq011	Australia	SW1	8.5
X192	Rr009	Australia	SWM	7.1
X194	Rr002	Australia	Mixed	8.5
X196	97177	Hubei (China)	SW2	8.6
X198	96021	Hubei (China)	Mixed	40.8
X200	96063	Hubei (China)	SW1	8
X202	1111	Hubei (China)	SW1	7.1
X204	1570	Hubei (China)	SW1	6.9
X206	9Bao22	Hubei (China)	SW1	7.7
X208	1188	Hubei (China)	SWM	7.5
X210	2354	Hubei (China)	SWM	7.6
X212	2359	Hubei (China)	SW1	7.4
X214	2365	Hubei (China)	SW1	8
X218	93210	Hubei (China)	SWM	7.6
X220	Nca	Hubei (China)	SW1	10.7
X222	Zhongshuang4	Hubei (China)	SW1	8.7
X224	Zhongshuang9	Hubei (China)	SW1	8.3
X226	Zhongshuang11	Hubei (China)	SW1	8.9
X228	2011-6200	Hubei (China)	SW1	8.3
X230	2011-6308	Hubei (China)	SPR	7.3
X232	2011-7103	Hubei (China)	SW1	7.6
X234	2012-11526	Hubei (China)	SW1	8.8
X236	2012-3448	Hubei (China)	Mixed	9
X238	2012-3546	Hubei (China)	SWM	10.1
X240	2012-4531	Hubei (China)	Mixed	10.6
X242	2012-5086	Hubei (China)	SW1	7.8
X244	2012-5113	Hubei (China)	SW1	8.2
X246	2012-8327	Hubei (China)	SW1	7.9
X248	2012-8355	Hubei (China)	Mixed	8.6
X250	2012-8380	Hubei (China)	SWM	8.8
X252	2012-8998	Hubei (China)	SW1	8.9
X254	2012-9323	Hubei (China)	SW1	8.4
X256	2012-9354	Hubei (China)	SW1	7.3
X258	2012-9380	Hubei (China)	SW1	7
X260	2012-9478	Hubei (China)	Mixed	37.6
X262	2012-9542	Hubei (China)	SW1	7.5
X264	2012-K8053	Hubei (China)	Mixed	6.6
X266	R2	Hubei (China)	Mixed	8.6
X268	Xiwang106	Hubei (China)	SW1	7.6
X270	Yangguang198	Hubei (China)	SW1	8.1
X272	Yangguang209	Hubei (China)	SW1	7
X274	L134	Hubei (China)	SW1	6.6
X276	L135	Hubei (China)	SW1	6.9
X278	L136	Hubei (China)	SW1	7.8
X280	L137	Hubei (China)	SWM	7.5
X282	L138	Hubei (China)	SWM	7.3
X284	L139	Hubei (China)	SW1	8.6
X286	L140	Hubei (China)	SWM	8.5
X288	Huayou2	Hubei (China)	SW2	8.3
X290	Major	France	Mixed	7.5
X292	Huashuang2	Hubei (China)	SWM	7.6
X294	Aurora	German	SWM	8.9
X296	Huayou13	Hubei (China)	SW2	7.4
X298	Rucabo	German	Mixed	8.6
X300	Huayou3	Hubei (China)	SW2	10.5
X302	Huayou14	Hubei (China)	SW2	9.3
X304	Ningyou1	Jiangsu(China)	SW2	9.1
X306	Ceres	German	Mixed	8.1
X308	11-9-700	Hubei (China)	SW1	8.1
X310	11-9-701	Hubei (China)	SWM	8.6
X314	11-9-703	Hubei (China)	Mixed	8
X316	11-9-704	Hubei (China)	SWM	8.4
X318	11-9-705	Hubei (China)	Mixed	7.6
X320	11-9-706	Hubei (China)	SW1	8.3
X322	11-9-707	Hubei (China)	SWM	8
X324	11-P63-5	Hubei (China)	SW1	7.5
X326	11-P63-8	Hubei (China)	Mixed	8.5
X328	11-P63-3	Hubei (China)	Mixed	8.2
X330	11-P67	Hubei (China)	SWM	7.4
X334	42666	Hubei (China)	SW1	8.6
X336	42667	Hubei (China)	SWM	8.4
X338	42668	Hubei (China)	SWM	8
X340	42672	Hubei (China)	SWM	8.7
X342	10-32	Hubei (China)	Mixed	6.5
X344	10-33	Hubei (China)	SWM	7.5
X346	10-34	Hubei (China)	SW1	9.6
X348	42645	Hubei (China)	Mixed	8.9
X350	42646	Hubei (China)	SWM	7.3
X352	11-7-103	Hubei (China)	SW1	8.1
X354	11-7-117	Hubei (China)	SW1	9.1
X356	11-7-125	Hubei (China)	SWM	9.3
X358	11-P74-8	Hubei (China)	SW1	7.7
X360	11-P74-13	Hubei (China)	SW1	8
X362	7-7766-74	Hubei (China)	SWM	7.9
X364	P18	Hubei (China)	SW1	9.1
X366	23651	Hubei (China)	Mixed	8.1
X368	Shengguang77	Hubei (China)	SW1	8.1
X370	Jiayu17	Hubei (China)	SW1	7.9
X372	Jiayu25	Hubei (China)	Mixed	9
X374	Jiayu16	Hubei (China)	SWM	8.2
X376	Jiayu31	Hubei (China)	Mixed	8.2
X378	Huashuang5	Hubei (China)	SW1	7.2
X380	Huashuang4	Hubei (China)	SW1	7.6
X384	Huashuang128	Hubei (China)	SW1	8
X386	Jia904	Hubei (China)	SW1	8.2
X388	Jia908	Hubei (China)	SW1	7.7
X390	Jiapf190	Hubei (China)	SWM	8.9
X392	Jia915	Hubei (China)	SW1	8.2
X394	Jia922	Hubei (China)	SW1	8.1
X396	Jia951	Hubei (China)	SWM	9.9
X398	Jia917	Hubei (China)	Mixed	8.1
X400	Jia923	Hubei (China)	SW1	8.3
X402	Jia931	Hubei (China)	SW1	7.7
X404	Jiayu05	Hubei (China)	SWM	6.9
X406	Jia963	Hubei (China)	Mixed	8.8
X408	Huyou17	Shanghai (China)	SWM	7.3
X410	Huyou15	Shanghai (China)	SW1	10.9
X412	Huyou12	Shanghai (China)	Mixed	8.9
X414	Ningyou18	Jiangsu (China)	SWM	8.5
X416	Ningyou16	Jiangsu (China)	SWM	8.8
X420	Ningyou12	Jiangsu (China)	SWM	8
X422	Shilijia	Jiangsu (China)	SWM	10
X424	Shilifeng	Jiangsu (China)	SWM	8.3
X428	Yangyou6	Jiangsu (China)	SW2	9
X430	Yangyou5	Jiangsu (China)	SWM	7.4
X432	Zhengyou3	Jiangsu (China)	SW2	7.7
X434	Hongyou3	Jiangsu (China)	SW2	8
X436	Suyou1	Jiangsu (China)	SWM	8.6
X438	Zheyou18	Zhejiang (China)	SWM	7.6
X440	Zheshuang72	Zhejiang (China)	SWM	9.7
X442	Zheshuang8	Zhejiang (China)	SWM	7.4
X444	Zheyou758	Zhejiang (China)	SWM	8
X446	Huyou14	Shanghai (China)	SW1	9.3
X448	Huyou18	Shanghai (China)	Mixed	8.5
X450	Huyou19	Shanghai (China)	SWM	8.9
X452	Zheyou19	Zhejiang (China)	SWM	9.2
X454	Zheyou21	Zhejiang (China)	SWM	9.1
X456	Zheshuang6	Zhejiang (China)	SWM	7.8
X458	Wanyou15	Anhui (China)	SW2	10.4
X460	Wanyou16	Anhui (China)	Mixed	7.8
X462	Wanyou20	Anhui (China)	SW1	7.5
X464	Wanyou29	Anhui (China)	SWM	8.5
X466	Agrev012	German	SPR	7.6
X468	Agrev019	German	SPR	7.4
X470	Agrev021	German	SPR	7.5
X472	Topas	Sweden	SPR	8.2
X474	Cyclon	United_Kingdom	SPR	9.3
X476	We-241	Canada	SPR	7.9
X478	Si-242	Canada	SPR	8.2
X480	Zh-243	Canada	SW2	7.3
X482	Hai-244	Canada	SPR	8.5
X484	D2	Danmark	SPR	7.9
X486	D3	Danmark	SPR	8.6
X488	Q-247	the USA	SPR	9.4
X490	11-985	Qinghai (China)	SPR	8.7
X492	11-504	Qinghai (China)	Mixed	8.7
X494	11-997	Qinghai (China)	SPR	8.9
X496	11-540	Qinghai (China)	SPR	8.1
X498	11-1184	Qinghai (China)	Mixed	7.1
X500	10-758	Qinghai (China)	SPR	8.8
X502	10-1230	Qinghai (China)	SPR	9.7
X504	10-847	Qinghai (China)	SPR	8
X506	11-1124	Qinghai (China)	SPR	8.4
X508	Shan2B	Shanxi (China)	SW2	8.1
X510	Kenc1	Shanxi (China)	SW2	7.4
X512	P113	Shanxi (China)	SWM	9.5
X514	P158	Shanxi (China)	Mixed	8.4
X516	P310	Shanxi (China)	Mixed	7.9
X518	P312	Shanxi (China)	Mixed	9.6
X520	P668	Shanxi (China)	Mixed	8.4
X522	P685	Shanxi (China)	Mixed	7.3
X524	A117	Shanxi (China)	Mixed	7.3
X526	A172	Shanxi (China)	SW1	7.6
X528	B250	Shanxi (China)	Mixed	7.3
X530	B265	Shanxi (China)	SWM	8.7
X532	A109	Shanxi (China)	SW2	8.5
X534	B285	Shanxi (China)	SW1	8.5
X536	C052	Shanxi (China)	Mixed	8.1
X538	Gy270	Shanxi (China)	SWM	9.6
X540	Gy282	Shanxi (China)	Mixed	9
X542	Gy284	Shanxi (China)	SWM	8.6
X544	B262	Henan (China)	Mixed	9.2
X546	A82	Jiangxi (China)	Mixed	6.9
X548	A98	Shanxi (China)	Mixed	10.1
X550	B414	Xinjiang (China)	SWM	8.6
X552	B308	Sweden	Mixed	6.5
X554	A97	Sichuan (China)	Mixed	8.8
X556	A148	Sweden	SW2	9
X558	B431	Danmark	SPR	8.2
X560	08-P35	Hubei (China)	Mixed	8.1
X562	08-P36	Hubei (China)	SPR	9.5
X564	09-P32	Hubei (China)	SPR	8.4
X566	09-P36	Hubei (China)	Mixed	9.3
X568	09-P37	Hubei (China)	Mixed	9.4
X570	10-P10	Hubei (China)	Mixed	8.8
X572	10-P29	Hubei (China)	Mixed	9.1
X574	11-P30	Hubei (China)	Mixed	11.3
X576	12-P24	Hubei (China)	Mixed	40.7
X578	12-P25	Hubei (China)	SW1	8.5
X582	03II3B	Gansu (China)	SPR	9.6
X584	03I32B	Gansu (China)	SPR	7.3
X586	964	Gansu (China)	SPR	8
X588	Dd1	Gansu (China)	Mixed	9.5
X590	Gl302-1	Gansu (China)	Mixed	6.5
X592	06T9F	Gansu (China)	Mixed	8.4
X594	Longyou2	Gansu (China)	SPR	8.3
X596	03II4B	Gansu (China)	SPR	8.2
X598	03Lf1	Gansu (China)	SPR	8.8
X600	9852	Gansu (China)	SW1	8.6
X602	9801C	Gansu (China)	SPR	8.2
X604	986	Gansu (China)	Mixed	8.3
X606	876	Gansu (China)	SPR	8
X608	Wu164	Gansu (China)	SPR	6.7
X610	Longyou4	Gansu (China)	SPR	7.1
X612	9889	Gansu (China)	SPR	10.2
X614	06H7	Gansu (China)	Mixed	8.9
X616	Tianyou4	Gansu (China)	SPR	9.1
X618	Swu01	Hubei (China)	SW2	8.7
X620	Swu2	Chongqing (China)	SWM	8.7
X622	Imc103	Chongqing (China)	SPR	37.5
X624	O-136	Chongqing (China)	Mixed	8.6
X626	Sophia	unknown	SPR	8.8
X628	Ca-318	German	SPR	10.8
X630	Conny	Sweden	SPR	9.5
X632	Wesreo	Australia	SPR	8.9
X634	Wase Chousen	Japan	SWM	8.6
X636	Gogatsuna	Japan	SW2	9.9
X638	Nakaee Chousen	Japan	SW2	39
X640	Cat.No.117	Union of Soviet	SPR	9
X642	90750	Chongqing (China)	Mixed	8.9
X644	Norin43	Japan	SW2	10.1
X648	Youyan2	Guizhou (China)	SW2	9.5
X650	Swu39	Sichuan (China)	Mixed	8.5
X654	Swu41	Chongqing (China)	SWM	9.6
X656	Swu49	Chongqing (China)	SWM	9
X658	Swu54	Chongqing (China)	SWM	10.9
X660	Swu57	Chongqing (China)	SWM	9.6
X662	Swu60	Chongqing (China)	Mixed	9.3
X664	Swu61	Chongqing (China)	SPR	7.9
X666	Swu62	Chongqing (China)	SPR	8.1
X668	Swu63	Chongqing (China)	SW1	8.3
X670	Swu64	Chongqing (China)	SWM	8.7
X672	Swu66	Chongqing (China)	Mixed	8.4
X676	Swu68	Chongqing (China)	SW1	7.7
X678	Swu69	Chongqing (China)	SW1	8.2
X680	Swu70	Chongqing (China)	SW1	7.6
X682	Swu71	Chongqing (China)	Mixed	41.1
X684	Swu74	Chongqing (China)	SWM	7.2
X686	Swu75	Chongqing (China)	SW1	7.4
X688	Swu76	Chongqing (China)	SWM	7.5
X690	Swu77	Chongqing (China)	SWM	7.9
X692	Swu80	Chongqing (China)	SW1	7.9
X694	Swu81	Chongqing (China)	SWM	8.9
X696	Swu84	Chongqing (China)	SW1	8.1
X698	Swu85	Chongqing (China)	Mixed	10
X700	Swu97	Chongqing (China)	SW1	9.5
X702	Swu88	Chongqing (China)	SW1	7.5
X704	Swu89	Chongqing (China)	SWM	7.5
X706	Swu90	Chongqing (China)	SWM	7.4
X708	Swu93	Chongqing (China)	SW1	7.6
X710	Swu94	Chongqing (China)	SW1	9
X712	Swu95	Chongqing (China)	Mixed	8.2
X714	Swu96	Chongqing (China)	SW1	8.8
X716	Swu99	Chongqing (China)	SW1	9.4
X718	Swu100	Chongqing (China)	SW1	7.9
X720	Swu102	Chongqing (China)	SW1	6.9
X722	Swu103	Chongqing (China)	SWM	9
X724	Swu104	Chongqing (China)	SWM	8.8
X728	Swu107	Chongqing (China)	SWM	9.4
X730	Swu110	Chongqing (China)	SWM	9.1
X732	Swu111	Chongqing (China)	SWM	7.8
X736	Swu113	Chongqing (China)	SW1	7.8
X738	Swu114	Chongqing (China)	SW1	8.5
X740	Zhongshuang10	Hubei (China)	SWM	8.6
X742	Zhongshuang6	Hubei (China)	SW1	9
X744	Zhongshuang7	Hubei (China)	SW1	7.6
X746	Zhongshuang12	Hubei (China)	SWM	7.1
X748	Zhongyou589	Hubei (China)	SW1	7.7
X750	Fuyou4	Heilongjiang(China)	Mixed	8.5
X752	Zhen3736	Jiangsu (China)	SW2	8.4
X754	Zhenyou6	Jiangsu (China)	SW2	7.3
X756	Hx0352	Jiangsu (China)	SW2	8.1
X758	Yangguang2009	Hubei (China)	SW2	6.7
X760	Huyou21	Shanghai (China)	SW2	7.9
X762	Zheshuang3	Zhejiang (China)	Mixed	7.5
X764	L385	Zhejiang (China)	SWM	7.6
X766	L386	Anhui (China)	SW2	7
X768	Wanyou12	Anhui (China)	SW2	6.7
X770	Wanyou7	Anhui (China)	SW2	8.2
X772	L389	Jiangsu (China)	SW2	8.8
X774	Zhenyou5	Jiangsu (China)	SW2	7.7
X776	Yangyou4	Jiangsu (China)	Mixed	6.4
X778	L392	Shanghai (China)	SWM	7.2
X780	L393	Shanghai (China)	SW2	35
X782	L394	Shanghai (China)	SW2	7.3
X784	L395	Shanghai (China)	SWM	7.8
X786	L396	Zhejiang (China)	SW2	9.1
X788	L397	Zhejiang (China)	SW2	7.2
X790	Zheyou50	Zhejiang (China)	SW2	8.8
X794	L400	Hubei (China)	SW1	8
X796	L401	Hubei (China)	SW1	8.1
X798	L402	Hubei (China)	SW1	7.4
X800	Huahang901	Hubei (China)	SW1	8.2
X802	Yangj6711	Jiangsu (China)	SW1	6.7
X804	Yan6055	Jiangsu (China)	SWM	5.7
X808	L407	Hubei (China)	SW1	6.1
X810	Zheyou17	Zhejiang (China)	SW1	5.6
X814	Zhongyou821	Hubei (China)	SW1	6
X816	Qinyou1	Shanxi (China)	SW2	6.8
X818	Weilong88	Hubei (China)	Mixed	9.1
X820	Yanyou2	Jiangsu (China)	Mixed	7.3
X822	Qinyou5	Shanxi (China)	Mixed	6.7
X824	Suyou4	Jiangsu (China)	SW1	7.2
X826	Fengyou9	Henan (China)	SW1	7.4
X828	De68-12	Anhui (China)	SWM	7
X830	Monty	Australia	Mixed	7
X834	L420	Jiangsu (China)	SW2	6.8
X836	L421	Jiangsu (China)	SW2	6.7
X838	L424	Jiangsu (China)	SWM	6.4
X840	Helios	Denmark	SW2	6.9
X842	He-426	Hubei (China)	SW2	7.1
X844	96—203	Qinghai (China)	SWM	6.9
X846	Qing662	Hubei (China)	SW2	7.4
X848	699	Hubei (China)	SW1	6.9
X850	Canadian2	Canada	SWM	7
X852	Zhongshuang2	Hubei (China)	SW1	8.1
X854	Zhongshuang3	Hubei (China)	SW1	7
X858	Wh-15	Hubei (China)	Mixed	6.1
X860	Wh-17	Hubei (China)	SW1	9.4
X862	Wh-19	Hubei (China)	SW1	7
X864	Wh-20	Hubei (China)	SW1	9.4
X866	Wh-23	Hubei (China)	SW1	6.3
X868	Wh-24	Hubei (China)	SW1	7
X872	Wh-26	Hubei (China)	SWM	7.4
X876	Wh-28	Hubei (China)	SWM	7.4
X878	Wh-29	Hubei (China)	SWM	6.9
X880	Wh-30	Hubei (China)	Mixed	9.6
X884	Wh-33	Hubei (China)	SW1	7
X888	Wh-38	Hubei (China)	Mixed	8
X890	Wh-41	Hubei (China)	Mixed	12.7
X892	Wh-42	Hubei (China)	Mixed	36.2
X894	Wh-43	Hubei (China)	Mixed	6.9
X896	Wh-45	Hubei (China)	SPR	7.2
X898	Wh-49	Hubei (China)	Mixed	8
X900	Wh-50	Hubei (China)	Mixed	7.4
X902	Wh-55	Hubei (China)	SPR	9.4
X904	Wh-56	Hubei (China)	SPR	8.8
X906	Wh-57	Hubei (China)	Mixed	7.5
X908	Wh-58	Hubei (China)	Mixed	7.2
X910	Wh-59	Hubei (China)	Mixed	7.4
X912	Wh-60	Hubei (China)	SPR	7.9
X914	Wh-61	Hubei (China)	Mixed	6.3
X916	Wh-62	Hubei (China)	Mixed	6.8
X918	Wh-63	Hubei (China)	Mixed	9.7
X920	Wh-81	Hubei (China)	Mixed	6.6
X922	Wh-83	Hubei (China)	Mixed	7.4
X924	Wh-85	Hubei (China)	Mixed	11.8
X926	Wh-88	Hubei (China)	Mixed	7.5
X928	Wh-93	Hubei (China)	SPR	7.6
X930	Wh-95	Hubei (China)	Mixed	6.9
X932	Wh-100	Hubei (China)	Mixed	7.8
X934	Wh-127	Hubei (China)	Mixed	7.3
X936	Yuyou1	Henan (China)	SWM	7.3
X938	Cobra	German	Mixed	7.5
X940	Ningyou 7	Jiangsu (China)	SW2	9.2
X944	Huayou6	Hubei (China)	SW2	7
X946	Huayou12	Hubei (China)	Mixed	6.5
X948	Cubs Root	Korea	SWM	7.9
X950	Huayou10	Hubei (China)	SW2	10.8
X952	Bienvenu	France	Mixed	7.5
X954	Shengliyoucai	Japan	SW2	7.5
X956	Erake	Poland	Mixed	7.8
X958	Taisetsu	Japan	SW2	8.4
X960	Cresor	France	SPR	8.4
X962	Daichousen	Japan	SWM	8.2
X964	Comet	Sweden	SPR	7.6
X966	Niklas	Denmark	Mixed	7
X968	Askari	German	SWM	38.3
X970	Chuosenshu	Korea	Mixed	8.8
X972	Wesbrook	Australia	Mixed	7.1
X974	Suigenshu	Korea	SW2	7.6
X976	Huayou4	Hubei (China)	SW2	8.5
X978	Y1	Shanghai (China)	SW2	8.3
X980	Y2	Shanghai (China)	SW2	8.7
X982	Y3	Shanghai (China)	SW2	8.4
X984	Y4	Shanghai (China)	SW2	8.6
X986	Huyou3	Shanghai (China)	SW2	8.1
X988	Y6	Shanghai (China)	SWM	9.1
X990	Y7	Shanghai (China)	Mixed	7.8
X992	Y8	Shanghai (China)	SW2	9.5
X994	Caoyou2	Shanghai (China)	SW2	8
X996	L503	Shanghai (China)	SWM	8.4
X998	Y14	Jiangsu (China)	SW2	7.7
X1000	Y15	Jiangsu (China)	SPR	8.2
X1002	Y16	Jiangsu (China)	SW2	7.7
X1004	Y17	Jiangsu (China)	SWM	9.1
X1006	L508	Jiangsu (China)	SW2	8.2
X1010	Ningyou8	Jiangsu (China)	Mixed	7.7
X1012	Ningyou6	Jiangsu (China)	Mixed	8.6
X1014	Y32	Jiangsu (China)	SW2	7.8
X1016	Y33	Japan	SW2	7.9
X1018	Huaiyou12	Jiangsu (China)	Mixed	9.2
X1020	Peixuan170	Jiangsu (China)	SW2	7.6
X1022	Guangde138	Anhui (China)	SW2	7.9
X1024	Guangde8104	Anhui (China)	SW2	8.4
X1026	Y38	Anhui (China)	SW2	8.3
X1028	Guangde761	Anhui (China)	SW2	8.2
X1030	Y40	Anhui (China)	SW2	9.1
X1032	Chu610	Anhui (China)	SW2	7.8
X1034	Chu107	Anhui (China)	SWM	7.9
X1036	Su84-6	Anhui (China)	SW2	8
X1038	Y44	Anhui (China)	SW2	9
X1040	Chuyou1	Anhui (China)	SWM	8.1
X1042	Y46	Anhui (China)	Mixed	40.2
X1044	Jie65-1	Zhejiang (China)	SW2	7.8
X1046	Shenhuang1	Shanghai (China)	SW2	8.6
X1048	Zheyou601	Zhejiang (China)	SW1	11
X1050	Y61	Zhejiang (China)	SWM	6.9
X1052	Zaofeng1	Zhejiang (China)	SW1	8.3
X1054	WH2571	Hubei (China)	Mixed	9.5
X1056	WH3004	Hubei (China)	Mixed	9
X1058	WH3401	Hubei (China)	SWM	8.6
X1060	WH3404	Hubei (China)	SW2	8.7
X1062	WH3411	Hubei (China)	SWM	9.5
X1064	WH3417	Hubei (China)	SWM	11.1
X1066	WH3424	Hubei (China)	SWM	8.1
X1068	WH3518	Hubei (China)	Mixed	8.3
X1070	WH3565	Hubei (China)	SWM	9.7
X1072	WH5557	Hubei (China)	Mixed	8.4

## Sheet: ST2
Table S2. Lead SNPs significantly associated with seed fatty acids and their ratios
C16:0
Summarization of significant candidate loci:
SNP	Chromosome	Position	LMM_P
BnvaA0810151436	chrA08	10151436	8.65479e-39
BnvaA0931542153	chrA09	31542153	3.63037e-22
BnvaC0356398549	chrC03	56398549	4.65124e-13
BnvaA0902646816	chrA09	2646816	5.93485e-11
BnvaA0224099591	chrA02	24099591	4.27056e-10
BnvaC0245049896	chrC02	45049896	5.64794e-09
BnvaC0355868099	chrC03	55868099	2.40442e-08
BnvaA0325300558	chrA03	25300558	3.55282e-08
BnvaA0320693230	chrA03	20693230	4.76458e-08
BnvaC0353724038	chrC03	53724038	9.22105e-08
BnvaA0320672104	chrA03	20672104	1.59781e-07
C18:0
Summarization of significant candidate loci:
SNP	Chromosome	Position	LMM_P
BnvaA0810151436	chrA08	10151436	4.13868e-25
BnvaA0931542153	chrA09	31542153	6.04598e-15
BnvaC0355592582	chrC03	55592582	2.0712e-14
BnvaA0903033164	chrA09	3033164	2.95756e-12
BnvaC0244853558	chrC02	44853558	3.49414e-10
BnvaC0356781784	chrC03	56781784	1.24956e-07
BnvaA0223996911	chrA02	23996911	1.68568e-07
BnvaA0902183068	chrA09	2183068	1.89804e-07
BnvaC0355871096	chrC03	55871096	1.92515e-07
BnvaA0404241446	chrA04	4241446	8.69185e-07
C18:1
Summarization of significant candidate loci:
SNP	Chromosome	Position	LMM_P
BnvaA0810151436	chrA08	10151436	5.58584e-58
BnvaA0931542153	chrA09	31542153	7.30045e-27
BnvaC0356398549	chrC03	56398549	8.59894e-25
BnvaC0355838162	chrC03	55838162	1.47808e-13
BnvaA0902611073	chrA09	2611073	5.38267e-13
BnvaC0244859705	chrC02	44859705	6.29679e-11
BnvaA1010468967	chrA10	10468967	5.75311e-09
BnvaA0811104848	chrA08	11104848	7.47751e-09
BnvaA0805599530	chrA08	5599530	1.79062e-08
BnvaA0224099594	chrA02	24099594	5.06938e-08
BnvaA0810651059	chrA08	10651059	6.4384e-07
BnvaC0125242235	chrC01	25242235	7.22093e-07
C18:2
Summarization of significant candidate loci:
SNP	Chromosome	Position	LMM_P
BnvaA0810151436	chrA08	10151436	1.82948e-28
BnvaA0931538741	chrA09	31538741	1.47836e-16
BnvaC0356398549	chrC03	56398549	6.54896e-11
BnvaC0355842841	chrC03	55842841	2.21347e-10
BnvaA0223996911	chrA02	23996911	4.93985e-08
BnvaA0902612389	chrA09	2612389	8.40078e-08
BnvaC0133097275	chrC01	33097275	1.43604e-07
BnvaC0358450537	chrC03	58450537	1.53277e-07
BnvaC0245021265	chrC02	45021265	3.16239e-07
BnvaA0601780668	chrA06	1780668	3.45886e-07
BnvaA0607610250	chrA06	7610250	5.60062e-07
BnvaC0353724038	chrC03	53724038	7.9376e-07
C20:1
Summarization of significant candidate loci:
SNP	Chromosome	Position	LMM_P
BnvaA0810151436	chrA08	10151436	8.63298e-62
BnvaA0931542153	chrA09	31542153	3.67638e-29
BnvaC0356398549	chrC03	56398549	6.97284e-22
BnvaC0355836751	chrC03	55836751	3.1124e-13
BnvaA0902629472	chrA09	2629472	1.68678e-12
BnvaC0244887920	chrC02	44887920	2.59438e-09
BnvaA0811104848	chrA08	11104848	1.96245e-08
BnvaA1010468967	chrA10	10468967	5.54299e-08
BnvaA0805599530	chrA08	5599530	7.1353e-08
BnvaC0102390854	chrC01	2390854	5.60461e-07
BnvaC0357997979	chrC03	57997979	5.82809e-07
BnvaA0810682312	chrA08	10682312	8.70342e-07
C22:1
Summarization of significant candidate loci:
SNP	Chromosome	Position	LMM_P
BnvaA0810151436	chrA08	10151436	1.52777e-61
BnvaA0931542153	chrA09	31542153	2.08497e-29
BnvaC0356398549	chrC03	56398549	6.7916e-28
BnvaC0355619752	chrC03	55619752	3.6715e-16
BnvaA0902612389	chrA09	2612389	5.45287e-15
BnvaC0244879480	chrC02	44879480	1.93648e-12
BnvaA0224099591	chrA02	24099591	5.90856e-11
BnvaA0811095696	chrA08	11095696	1.22351e-09
BnvaA1010468967	chrA10	10468967	3.88506e-08
BnvaA0810651059	chrA08	10651059	5.84237e-08
BnvaC0358450537	chrC03	58450537	1.1225e-07
BnvaC0355864717	chrC03	55864717	1.92037e-07
BnvaA0805599530	chrA08	5599530	2.78353e-07
BnvaA0810899255	chrA08	10899255	3.9367e-07
BnvaC0357998007	chrC03	57998007	4.32772e-07
BnvaC0125242235	chrC01	25242235	5.76087e-07
BnvaC0356767272	chrC03	56767272	6.33895e-07
BnvaC0356783730	chrC03	56783730	8.79748e-07
C18:1/C18:2
Summarization of significant candidate loci:
SNP	Chromosome	Position	LMM_P
BnvaA0810151436	chrA08	10151436	1.42443e-25
BnvaC0356401098	chrC03	56401098	1.31538e-13
BnvaA0931542153	chrA09	31542153	3.54222e-12
BnvaC0244859705	chrC02	44859705	1.36074e-08
BnvaA0902978060	chrA09	2978060	1.43958e-07
BnvaA0520875457	chrA05	20875457	2.51863e-07
BnvaC0355838162	chrC03	55838162	3.88086e-07
BnvaA0913151536	chrA09	13151536	6.01781e-07
BnvaA0805598850	chrA08	5598850	6.61267e-07
BnvaA1010468967	chrA10	10468967	8.90811e-07
BnvaA0202061740	chrA02	2061740	8.95875e-07
BnvaA0811580795	chrA08	11580795	9.68208e-07
C18:1/C18:3
Summarization of significant candidate loci:
SNP	Chromosome	Position	LMM_P
BnvaA0810151436	chrA08	10151436	1.78606e-39
BnvaA0931542153	chrA09	31542153	1.29236e-19
BnvaC0356398549	chrC03	56398549	7.80853e-18
BnvaC0244859705	chrC02	44859705	5.32953e-12
BnvaA0902629472	chrA09	2629472	2.39056e-11
BnvaC0355838162	chrC03	55838162	6.41267e-10
BnvaA1010468967	chrA10	10468967	2.98633e-07
BnvaA0223719831	chrA02	23719831	4.0768e-07
BnvaA0805599530	chrA08	5599530	4.13294e-07
BnvaC0358196688	chrC03	58196688	4.35904e-07
BnvaC0356050712	chrC03	56050712	5.16616e-07
BnvaA0928548719	chrA09	28548719	9.09086e-07
C18:1/C20:1
Summarization of significant candidate loci:
SNP	Chromosome	Position	LMM_P
BnvaA0810151436	chrA08	10151436	1.98825e-34
BnvaA0931542153	chrA09	31542153	2.86999e-17
BnvaC0356398549	chrC03	56398549	2.2541e-14
BnvaA0902629472	chrA09	2629472	9.17578e-09
BnvaC0355870158	chrC03	55870158	3.96106e-08
BnvaA0119678674	chrA01	19678674	1.20943e-07
BnvaA0118472036	chrA01	18472036	9.64329e-07
C18:2/C18:3
Summarization of significant candidate loci:
SNP	Chromosome	Position	LMM_P
BnvaA0810151436	chrA08	10151436	8.5047e-29
BnvaA0931538741	chrA09	31538741	1.13124e-17
BnvaC0356406684	chrC03	56406684	2.78228e-12
BnvaA0902677575	chrA09	2677575	7.47879e-12
BnvaA0811161131	chrA08	11161131	1.0045e-08
BnvaC0355865016	chrC03	55865016	1.00973e-08
BnvaA0810653351	chrA08	10653351	3.06447e-08
BnvaA0223717553	chrA02	23717553	2.07697e-07
BnvaA0606219907	chrA06	6219907	3.9845e-07
BnvaA0811645412	chrA08	11645412	4.02992e-07
BnvaC0244862269	chrC02	44862269	4.41715e-07
BnvaA0810459505	chrA08	10459505	6.24137e-07
BnvaA0810872597	chrA08	10872597	9.72568e-07
C22:1/C18:1
Summarization of significant candidate loci:
SNP	Chromosome	Position	LMM_P
BnvaA0810151436	chrA08	10151436	3.4599e-48
BnvaC0356398549	chrC03	56398549	8.01619e-28
BnvaA0931538741	chrA09	31538741	1.29255e-26
BnvaC0355684358	chrC03	55684358	1.14961e-14
BnvaA0808770043	chrA08	8770043	2.72651e-12
BnvaA0902611073	chrA09	2611073	5.59637e-12
BnvaC0245021116	chrC02	45021116	1.86987e-10
BnvaC0356767272	chrC03	56767272	1.43276e-08
BnvaA0805232867	chrA08	5232867	3.00768e-08
BnvaA0805510788	chrA08	5510788	4.04406e-08
BnvaA0224099785	chrA02	24099785	6.03794e-08
BnvaC0900167775	chrC09	167775	8.29523e-08
BnvaA0207275232	chrA02	7275232	9.64742e-08
BnvaA1010468967	chrA10	10468967	1.18307e-07
BnvaC0352967801	chrC03	52967801	1.23242e-07
BnvaA0810366313	chrA08	10366313	1.25868e-07
BnvaC0125242235	chrC01	25242235	1.30022e-07
BnvaA0811107207	chrA08	11107207	2.20483e-07
BnvaA0100235699	chrA01	235699	2.24099e-07
C22:1/C18:2
Summarization of significant candidate loci:
SNP	Chromosome	Position	LMM_P
BnvaA0810151436	chrA08	10151436	1.80157e-54
BnvaA0931542153	chrA09	31542153	5.74924e-28
BnvaC0355988555	chrC03	55988555	4.79817e-22
BnvaC0355619752	chrC03	55619752	8.07635e-14
BnvaA0902612389	chrA09	2612389	1.04311e-09
BnvaA0808398577	chrA08	8398577	1.39227e-09
BnvaC0244862269	chrC02	44862269	1.93758e-09
BnvaA0805232867	chrA08	5232867	2.45894e-08
BnvaC0358450537	chrC03	58450537	7.67834e-08
BnvaA1010468967	chrA10	10468967	2.42982e-07
BnvaA0811665664	chrA08	11665664	2.49886e-07
BnvaC0356767272	chrC03	56767272	2.70631e-07
BnvaA0810276977	chrA08	10276977	2.81168e-07
BnvaA0224099591	chrA02	24099591	6.6756e-07
BnvaC0357821563	chrC03	57821563	6.97928e-07
BnvaC0356072325	chrC03	56072325	7.32044e-07
BnvaA0207275232	chrA02	7275232	7.67119e-07
C22:1/C18:3
Summarization of significant candidate loci:
SNP	Chromosome	Position	LMM_P
BnvaA0810151436	chrA08	10151436	1.83021e-51
BnvaA0931542153	chrA09	31542153	1.4224e-27
BnvaC0356398549	chrC03	56398549	2.39955e-21
BnvaC0355619752	chrC03	55619752	1.15172e-13
BnvaC0244879480	chrC02	44879480	6.73312e-10
BnvaA0902612389	chrA09	2612389	7.28467e-10
BnvaA0808001483	chrA08	8001483	6.7585e-09
BnvaA0805232867	chrA08	5232867	5.30838e-08
BnvaC0358450537	chrC03	58450537	1.37615e-07
BnvaC0356767272	chrC03	56767272	3.22966e-07
BnvaA1010468967	chrA10	10468967	3.87668e-07
BnvaA0224099591	chrA02	24099591	4.3879e-07
BnvaA0811095677	chrA08	11095677	6.33863e-07
BnvaA0810276958	chrA08	10276958	7.88637e-07

## Sheet: ST3
Table S3. Seed fatty acids BLUP co-location GWAS sites
Co-located	SNP	LMM_P	Pheno	R2	Name
1	BnvaA0810151436	8.63e-62	C20:1	1	qFA.A08
	BnvaA0810151436	1.53e-61	C22:1	1
	BnvaA0810151436	5.59e-58	C18:1	1
	BnvaA0810151436	1.8e-54	C22:1/C18:2	1
	BnvaA0810151436	1.83e-51	C22:1/C18:3	1
	BnvaA0810151436	3.46e-48	C22:1/C18:1	1
	BnvaA0810151436	1.79e-39	C18:1/C18:3	1
	BnvaA0810151436	8.65e-39	C16:0	1
	BnvaA0810151436	1.99e-34	C18:1/C20:1	1
	BnvaA0810151436	8.5e-29	C18:2/C18:3	1
	BnvaA0810151436	1.83e-28	C18:2	1
	BnvaA0810151436	1.42e-25	C18:1/C18:2	1
	BnvaA0810151436	4.14e-25	C18:0	1
2	BnvaA0931542153	2.08e-29	C22:1	1	qFA.A09.2
	BnvaA0931542153	3.68e-29	C20:1	1
	BnvaA0931542153	5.75e-28	C22:1/C18:2	1
	BnvaA0931542153	1.42e-27	C22:1/C18:3	1
	BnvaA0931542153	7.3e-27	C18:1	1
	BnvaA0931538741	1.29e-26	C22:1/C18:1	0.989021
	BnvaA0931542153	3.63e-22	C16:0	1
	BnvaA0931542153	1.29e-19	C18:1/C18:3	1
	BnvaA0931538741	1.13e-17	C18:2/C18:3	0.989021
	BnvaA0931542153	2.87e-17	C18:1/C20:1	1
	BnvaA0931538741	1.48e-16	C18:2	0.989021
	BnvaA0931542153	6.05e-15	C18:0	1
	BnvaA0931542153	3.54e-12	C18:1/C18:2	1
3	BnvaC0356398549	6.79e-28	C22:1	1	qFA.C03.1
	BnvaC0356398549	8.02e-28	C22:1/C18:1	1
	BnvaC0356398549	8.6e-25	C18:1	1
	BnvaC0355988555	4.8e-22	C22:1/C18:2	0.599626
	BnvaC0356398549	6.97e-22	C20:1	1
	BnvaC0356398549	2.4e-21	C22:1/C18:3	1
	BnvaC0356398549	7.81e-18	C18:1/C18:3	1
	BnvaC0355592582	2.07e-14	C18:0	0.529365
	BnvaC0356398549	2.25e-14	C18:1/C20:1	1
	BnvaC0356401098	1.32e-13	C18:1/C18:2	0.867528
	BnvaC0356398549	4.65e-13	C16:0	1
	BnvaC0356406684	2.78e-12	C18:2/C18:3	0.852113
	BnvaC0356398549	6.55e-11	C18:2	1
	BnvaC0357821563	6.98e-07	C22:1/C18:2	0.222445
	BnvaC0356072325	7.32e-07	C22:1/C18:2	0.319507
4	BnvaA0902612389	5.45e-15	C22:1	0.885295	qFA.A09.1
	BnvaA0902611073	5.38e-13	C18:1	0.79716
	BnvaA0902629472	1.69e-12	C20:1	0.788138
	BnvaA0903033164	2.96e-12	C18:0	0.669621
	BnvaA0902611073	5.6e-12	C22:1/C18:1	0.79716
	BnvaA0902677575	7.48e-12	C18:2/C18:3	1
	BnvaA0902629472	2.39e-11	C18:1/C18:3	0.788138
	BnvaA0902646816	5.93e-11	C16:0	0.886533
	BnvaA0902612389	7.28e-10	C22:1/C18:3	0.885295
	BnvaA0902612389	1.04e-09	C22:1/C18:2	0.885295
	BnvaA0902629472	9.18e-09	C18:1/C20:1	0.788138
	BnvaA0902612389	8.4e-08	C18:2	0.885295
	BnvaA0902978060	1.44e-07	C18:1/C18:2	0.650522
	BnvaA0902183068	1.9e-07	C18:0	0.230077
5	BnvaC0355619752	3.67e-16	C22:1	1	qFA.C03.2
	BnvaC0355684358	1.15e-14	C22:1/C18:1	0.984009
	BnvaC0355619752	8.08e-14	C22:1/C18:2	1
	BnvaC0355619752	1.15e-13	C22:1/C18:3	1
	BnvaC0355838162	1.48e-13	C18:1	0.95306
	BnvaC0355836751	3.11e-13	C20:1	0.96091
	BnvaC0355842841	2.21e-10	C18:2	0.930606
	BnvaC0355838162	6.41e-10	C18:1/C18:3	0.95306
	BnvaC0355865016	1.01e-08	C18:2/C18:3	0.944721
	BnvaC0355868099	2.4e-08	C16:0	0.930173
	BnvaC0355870158	3.96e-08	C18:1/C20:1	0.906955
	BnvaC0355871096	1.93e-07	C18:0	0.937234
	BnvaC0355838162	3.88e-07	C18:1/C18:2	0.95306
6	BnvaC0244879480	1.94e-12	C22:1	1	qFA.C02
	BnvaC0244859705	5.33e-12	C18:1/C18:3	0.837598
	BnvaC0244859705	6.3e-11	C18:1	0.837598
	BnvaC0245021116	1.87e-10	C22:1/C18:1	0.781073
	BnvaC0244853558	3.49e-10	C18:0	0.896181
	BnvaC0244879480	6.73e-10	C22:1/C18:3	1
	BnvaC0244862269	1.94e-09	C22:1/C18:2	0.783519
	BnvaC0244887920	2.59e-09	C20:1	0.937206
	BnvaC0245049896	5.65e-09	C16:0	0.755985
	BnvaC0244859705	1.36e-08	C18:1/C18:2	0.837598
	BnvaC0245021265	3.16e-07	C18:2	0.63732
	BnvaC0244862269	4.42e-07	C18:2/C18:3	0.783519
7	BnvaA0224099591	5.91e-11	C22:1	1	qFA.A02
	BnvaA0224099591	4.27e-10	C16:0	1
	BnvaA0223996911	4.94e-08	C18:2	0.849438
	BnvaA0224099594	5.07e-08	C18:1	1
	BnvaA0224099785	6.04e-08	C22:1/C18:1	1
	BnvaA0223996911	1.69e-07	C18:0	0.849438
	BnvaA0223717553	2.08e-07	C18:2/C18:3	0.654799
	BnvaA0223719831	4.08e-07	C18:1/C18:3	0.719404
	BnvaA0224099591	4.39e-07	C22:1/C18:3	1
	BnvaA0224099591	6.68e-07	C22:1/C18:2	1
8	BnvaA0811095696	1.22e-09	C22:1	1
	BnvaA0811104848	7.48e-09	C18:1	0.868188
	BnvaA0811104848	1.96e-08	C20:1	0.868188
	BnvaA0811107207	2.2e-07	C22:1/C18:1	0.797013
	BnvaA0811665664	2.5e-07	C22:1/C18:2	0.547804
	BnvaA0811645412	4.03e-07	C18:2/C18:3	0.370178
	BnvaA0811095677	6.34e-07	C22:1/C18:3	1
	BnvaA0810872597	9.73e-07	C18:2/C18:3	0.349265
9	BnvaA0931240698	1.32e-09	C183_All	1
10	BnvaA1010468967	5.75e-09	C18:1	1
	BnvaA1010468967	3.89e-08	C22:1	1
	BnvaA1010468967	5.54e-08	C20:1	1
	BnvaA1010468967	1.18e-07	C22:1/C18:1	1
	BnvaA1010468967	2.43e-07	C22:1/C18:2	1
	BnvaA1010468967	2.99e-07	C18:1/C18:3	1
	BnvaA1010468967	3.88e-07	C22:1/C18:3	1
	BnvaA1010468967	8.91e-07	C18:1/C18:2	1
11	BnvaA0811161131	1e-08	C18:2/C18:3	1
	BnvaA0805599530	1.79e-08	C18:1	0.233621
	BnvaA0805232867	2.46e-08	C22:1/C18:2	0.651096
	BnvaA0805232867	3.01e-08	C22:1/C18:1	0.651096
	BnvaA0805232867	5.31e-08	C22:1/C18:3	0.651096
	BnvaA0805599530	7.14e-08	C20:1	0.233621
	BnvaA0805599530	2.78e-07	C22:1	0.233621
	BnvaA0805599530	4.13e-07	C18:1/C18:3	0.233621
	BnvaA0805598850	6.61e-07	C18:1/C18:2	0.236483
12	BnvaC0356767272	1.43e-08	C22:1/C18:1	1
	BnvaC0356767272	2.71e-07	C22:1/C18:2	1
	BnvaC0356767272	3.23e-07	C22:1/C18:3	1
	BnvaC0356767272	6.34e-07	C22:1	1
13	BnvaA0810653351	3.06e-08	C18:2/C18:3	1
14	BnvaA0325300558	3.55e-08	C16:0	1
15	BnvaA0805510788	4.04e-08	C22:1/C18:1	1
16	BnvaA0320693230	4.76e-08	C16:0	1
17	BnvaA0810651059	5.84e-08	C22:1	1
	BnvaA0810651059	6.44e-07	C18:1	1
18	BnvaC0358450537	7.68e-08	C22:1/C18:2	1
	BnvaC0358450537	1.12e-07	C22:1	1
	BnvaC0358450537	1.38e-07	C22:1/C18:3	1
	BnvaC0358450537	1.53e-07	C18:2	1
19	BnvaC0900167775	8.3e-08	C22:1/C18:1	1
20	BnvaC0353724038	9.22e-08	C16:0	1
	BnvaC0353724038	7.94e-07	C18:2	1
21	BnvaA0207275232	9.65e-08	C22:1/C18:1	1
	BnvaA0207275232	7.67e-07	C22:1/C18:2	1
22	BnvaA0119678674	1.21e-07	C18:1/C20:1	1
23	BnvaC0352967801	1.23e-07	C22:1/C18:1	1
24	BnvaC0356781784	1.25e-07	C18:0	1
	BnvaC0356783730	8.8e-07	C22:1	0.483358
25	BnvaA0810366313	1.26e-07	C22:1/C18:1	1
26	BnvaC0125242235	1.3e-07	C22:1/C18:1	1
	BnvaC0125242235	5.76e-07	C22:1	1
	BnvaC0125242235	7.22e-07	C18:1	1
27	BnvaC0133097275	1.44e-07	C18:2	1
28	BnvaA0320672104	1.6e-07	C16:0	1
29	BnvaC0355864717	1.92e-07	C22:1	1
30	BnvaA0100235699	2.24e-07	C22:1/C18:1	1
31	BnvaA0520875457	2.52e-07	C18:1/C18:2	1
32	BnvaA0810276977	2.81e-07	C22:1/C18:2	1
	BnvaA0810276958	7.89e-07	C22:1/C18:3	1
33	BnvaA0601780668	3.46e-07	C18:2	1
34	BnvaA0810899255	3.94e-07	C22:1	1
35	BnvaA0606219907	3.98e-07	C18:2/C18:3	1
36	BnvaC0357998007	4.33e-07	C22:1	1
	BnvaC0357997979	5.83e-07	C20:1	0.981469
37	BnvaC0358196688	4.36e-07	C18:1/C18:3	1
38	BnvaC0356050712	5.17e-07	C18:1/C18:3	1
39	BnvaA0607610250	5.6e-07	C18:2	1
40	BnvaC0102390854	5.6e-07	C20:1	1
41	BnvaA0913151536	6.02e-07	C18:1/C18:2	1
42	BnvaA0810459505	6.24e-07	C18:2/C18:3	1
43	BnvaA0121094498	7.86e-07	C183_All	1
44	BnvaA0404241446	8.69e-07	C18:0	1
45	BnvaA0810682312	8.7e-07	C20:1	1
46	BnvaA0202061740	8.96e-07	C18:1/C18:2	1
47	BnvaA0928548719	9.09e-07	C18:1/C18:3	1
48	BnvaA0118472036	9.64e-07	C18:1/C20:1	1
49	BnvaA0811580795	9.68e-07	C18:1/C18:2	1

## Sheet: ST4
Table S4. Summary of TWAS-significant genes for oleic acid at 20 DAF
Gene	Lmm_p	Lr_beta	Tair	FDR
BnaA08g10900D	5.8232e-28	7.07217	/	5.07445e-23
BnaC03g77060D	1.62248e-26	-5.90389	AT3G42050	7.0693e-22
BnaA08g11870D	4.95977e-26	-5.11592	AT4G33210	1.44068e-21
BnaA08g11190D	8.4946e-26	11.5408	AT4G34430	1.85059e-21
BnaC03g77050D	2.63577e-21	7.75645	AT2G27960	4.59372e-17
BnaA08g10170D	3.61506e-21	6.7574	AT4G22220	5.2504e-17
BnaA08g10160D	2.32875e-19	14.1432	AT4G22140	2.89903e-15
BnaA08g11470D	8.67145e-19	-11.848	AT4G33680	9.4456e-15
BnaA08g12360D	3.54152e-18	8.4493	AT4G31770	3.42905e-14
BnaA08g30680D	8.99747e-17	-6.89237	AT4G32272	7.84058e-13
BnaA08g12140D	1.33489e-16	-3.77478	AT4G32570	1.0575e-12
BnaA08g11940D	1.60124e-16	-6.28327	AT4G33040	1.16279e-12
BnaA08g12100D	3.83267e-16	8.5757	AT4G32680	2.56913e-12
BnaA08g11910D	5.43368e-16	6.79503	AT4G33090	3.38215e-12
BnaA08g12030D	6.84538e-16	-8.64908	AT4G32760	3.9768e-12
BnaA08g10230D	2.47455e-14	18.2784	AT4G12590	1.34773e-10
BnaA07g12180D	4.79853e-14	6.99654	AT5G67020	2.45973e-10
BnaA08g09980D	6.28183e-14	8.53354	AT4G20940	3.04117e-10
BnaA08g12250D	1.1346e-13	6.76975	AT4G32300	5.20375e-10
BnaA08g11040D	1.55758e-13	17.4047	AT4G34670	6.78652e-10
BnaA08g10220D	3.02936e-13	15.0526	AT4G22360	1.25707e-09
BnaA08g11650D	4.37418e-13	-7.33698	AT4G34030	1.73261e-09
BnaA08g11770D	9.16228e-13	-15.9741	AT4G33430	3.47139e-09
BnaA08g30590D	1.05799e-12	8.34541	AT4G02890	3.84149e-09
BnaC03g66650D	2.02702e-12	-8.82565	AT1G29880	7.06554e-09
BnaA08g08530D	2.65507e-12	11.0167	AT4G18040	8.89878e-09
BnaC01g01300D	4.28083e-12	5.41384	/	1.38163e-08
BnaA08g11060D	6.3667e-12	14.6172	AT4G34640	1.98145e-08
BnaA08g10050D	8.50123e-12	5.21123	AT4G21865	2.55453e-08
BnaA08g12110D	1.01632e-11	9.99172	AT4G32680	2.95212e-08
BnaA08g11360D	1.70151e-11	-5.97085	AT4G34150	4.783e-08
BnaA08g10000D	1.96208e-11	-5.34373	AT4G21710	5.3431e-08
BnaA08g09120D	3.00552e-11	9.88515	AT4G19185	7.93657e-08
BnaA08g08200D	9.50212e-11	5.99491	AT4G17070	2.43539e-07
BnaAnng08820D	1.28671e-10	-2.74783	AT4G13950	3.20362e-07
BnaA08g11590D	1.36264e-10	10.089	AT4G34120	3.29841e-07
BnaA08g10290D	1.49571e-10	3.21609	AT1G11580	3.52166e-07
BnaA08g11170D	1.53569e-10	15.5718	AT4G34450	3.52166e-07
BnaA08g30700D	1.73281e-10	4.84461	AT4G31610	3.8718e-07
BnaA08g08380D	2.5163e-10	8.08537	AT4G17650	5.48188e-07
BnaA08g12180D	2.88745e-10	-11.0263	AT4G32520	6.13703e-07
BnaUnng05100D	3.26045e-10	4.29044	/	6.76482e-07
BnaC03g29980D	3.4868e-10	4.24955	AT3G17900	7.0662e-07
BnaC03g66720D	6.99051e-10	8.072	AT4G33220	1.38447e-06
BnaC02g33150D	7.82347e-10	2.70952	AT3G01910	1.51501e-06
BnaA08g11680D	9.12716e-10	8.14579	AT4G33985	1.72904e-06
BnaC02g33280D	9.41044e-10	3.30399	AT5G47200	1.74478e-06
BnaA08g12120D	1.10793e-09	-10.1115	AT4G32610	2.01141e-06
BnaA08g11860D	1.3804e-09	6.57354	AT4G33220	2.45492e-06
BnaC03g66460D	1.67024e-09	10.6564	AT4G33630	2.91097e-06
BnaCnng77270D	1.78211e-09	-4.04635	/	3.04503e-06
BnaA08g12090D	1.95232e-09	-6.66259	AT3G26560	3.27172e-06
BnaA08g09790D	2.29515e-09	7.38536	AT4G21160	3.77365e-06
BnaC02g46620D	2.82228e-09	3.16082	AT1G80780	4.55443e-06
BnaC03g66730D	3.1595e-09	11.5387	AT4G33210	5.00591e-06
BnaC02g33360D	3.35846e-09	2.01978	AT5G47570	5.14881e-06
BnaA08g09990D	3.36786e-09	7.83215	AT4G20930	5.14881e-06
BnaA08g11640D	3.82161e-09	-10.6004	AT4G34050	5.74178e-06
BnaC02g33120D	6.83423e-09	3.48679	AT5G47100	9.92921e-06
BnaCnng57390D	6.83658e-09	4.64936	AT5G47770	9.92921e-06
BnaC03g64990D	8.06688e-09	6.08192	AT2G04305	1.1524e-05
BnaA08g12500D	1.01455e-08	-3.40411	AT4G31400	1.42597e-05
BnaA09g05380D	1.14879e-08	4.94403	AT5G23300	1.58901e-05
BnaA08g30290D	1.2235e-08	6.43526	AT4G17300	1.66591e-05
BnaC02g33290D	1.26612e-08	2.68486	AT5G47210	1.68134e-05
BnaC03g77030D	1.27342e-08	4.85127	AT4G34200	1.68134e-05
BnaC02g33660D	1.30318e-08	2.57505	AT2G01140	1.68359e-05
BnaC02g42050D	1.31377e-08	5.52721	AT5G61170	1.68359e-05
BnaC02g29130D	1.37742e-08	2.8422	AT4G10450	1.73415e-05
BnaAnng31110D	1.39302e-08	9.20377	AT4G18710	1.73415e-05
BnaC02g33510D	1.50651e-08	3.2122	AT4G15950	1.84901e-05
BnaCnng39430D	1.57492e-08	3.6015	AT2G02910	1.90614e-05
BnaA08g12080D	1.62721e-08	-6.55004	AT3G26560	1.94244e-05
BnaA03g18950D	1.87592e-08	4.15647	/	2.20908e-05
BnaC08g46770D	2.02941e-08	14.0306	AT4G13950	2.35796e-05
BnaC02g34220D	2.32399e-08	2.20112	AT2G01970	2.6647e-05
BnaC02g33860D	2.51302e-08	3.53105	AT2G01270	2.84402e-05
BnaC02g42150D	2.93875e-08	4.95621	/	3.28318e-05
BnaC02g33420D	3.08252e-08	3.37674	AT5G47660	3.40022e-05
BnaA08g09100D	4.52306e-08	7.56324	AT4G19160	4.92686e-05
BnaC03g66990D	4.58714e-08	1.62185	AT2G12480	4.93497e-05
BnaA08g08270D	4.87975e-08	11.874	AT4G17390	5.13595e-05
BnaC02g31010D	4.89183e-08	2.74367	AT1G10230	5.13595e-05
BnaC02g47720D	5.07621e-08	2.58546	AT2G01710	5.26609e-05
BnaC02g23080D	5.24693e-08	3.11597	AT5G51280	5.37759e-05
BnaC02g33460D	5.30712e-08	2.76858	AT5G47690	5.37759e-05
BnaC02g27270D	5.60861e-08	2.83555	AT4G02730	5.61776e-05
BnaC02g33110D	5.94814e-08	3.16751	AT5G47090	5.89014e-05
BnaC02g33900D	6.22648e-08	3.066	AT2G01320	6.07304e-05
BnaC02g33480D	6.27221e-08	3.722	AT5G47730	6.07304e-05
BnaA08g12150D	6.40191e-08	-8.9175	AT4G32551	6.13049e-05
BnaA08g10460D	6.49737e-08	11.9388	AT4G22740	6.15428e-05
BnaC02g32060D	6.83452e-08	2.67855	AT5G46020	6.40402e-05
BnaA09g05160D	6.91261e-08	3.7119	AT4G39160	6.40829e-05
BnaA08g09020D	7.61812e-08	7.954	AT4G19100	6.91656e-05
BnaC02g30680D	7.61963e-08	2.2893	AT5G43950	6.91656e-05
BnaC03g66660D	8.53806e-08	-9.53984	AT1G29880	7.62083e-05
BnaC02g29610D	8.5704e-08	1.84801	AT5G42650	7.62083e-05
BnaC02g29100D	9.10969e-08	2.35174	AT4G10730	8.01855e-05
BnaCnng08350D	9.28376e-08	3.22932	AT4G11440	8.09006e-05
BnaC02g28050D	9.43241e-08	5.05389	AT4G02130	8.13181e-05
BnaC02g33380D	9.51831e-08	3.00901	AT5G47620	8.13181e-05
BnaC02g32110D	1.01551e-07	3.74935	AT5G46170	8.59159e-05
BnaC02g31750D	1.03308e-07	2.68802	AT5G45750	8.60772e-05
BnaA08g12590D	1.0446e-07	-3.58347	AT3G48110	8.60772e-05
BnaC04g06110D	1.05693e-07	5.58264	AT2G39470	8.60772e-05
BnaC04g06020D	1.05693e-07	5.58264	AT2G39470	8.60772e-05
BnaC02g29720D	1.09692e-07	2.25048	AT1G43170	8.85075e-05
BnaC02g34760D	1.11949e-07	2.83075	AT2G02760	8.94996e-05
BnaC08g08950D	1.17379e-07	2.83911	AT5G47060	9.22251e-05
BnaC02g30730D	1.17475e-07	6.85952	AT5G43990	9.22251e-05
BnaC02g33760D	1.19038e-07	2.59352	AT2G01250	9.26177e-05
BnaC02g46900D	1.22908e-07	3.02429	AT5G47390	9.47826e-05
BnaC02g39530D	1.24317e-07	2.81431	AT5G27970	9.50283e-05
BnaC03g60130D	1.3025e-07	7.00088	AT4G38690	9.79906e-05
BnaA08g10920D	1.30525e-07	11.2151	AT4G35040	9.79906e-05
BnaC02g26300D	1.32677e-07	3.70152	AT4G12570	9.79906e-05
BnaA08g11740D	1.3269e-07	-7.97923	AT4G33920	9.79906e-05
BnaC02g35210D	1.43052e-07	2.68281	AT2G03800	0.000104755
BnaCnng65550D	1.44695e-07	2.72509	AT4G10120	0.000105075
BnaA08g08120D	1.48931e-07	9.16696	AT4G16800	0.000107258
BnaA09g05200D	1.55188e-07	5.19662	AT5G23630	0.000110848
BnaC02g28900D	1.67502e-07	2.87154	AT4G11100	0.00011867
BnaC02g41820D	1.70614e-07	4.7429	AT5G60850	0.0001199
BnaCnng61350D	1.74962e-07	2.16155	AT4G10080	0.000121007
BnaA08g08790D	1.74966e-07	9.47212	AT1G36280	0.000121007
BnaA08g08370D	1.79109e-07	5.62215	AT4G17570	0.000122897
BnaC02g46800D	1.8393e-07	2.71544	AT4G10330	0.000125219
BnaC02g29260D	1.8659e-07	3.25771	AT2G29550	0.000126045
BnaCnng51050D	2.35142e-07	2.20417	AT5G44290	0.000157621
BnaC02g33070D	2.38926e-07	3.63613	AT5G47070	0.000158935
BnaA08g08210D	2.42606e-07	9.97923	AT4G17080	0.00016016
BnaA08g09850D	2.45973e-07	9.55583	AT4G21090	0.000161162
BnaC05g16650D	2.53096e-07	-5.97179	AT1G21390	0.000164592
BnaC02g34690D	2.65457e-07	2.5457	AT2G02560	0.000170652
BnaA08g12450D	2.66331e-07	4.85145	AT4G31480	0.000170652
BnaC02g30770D	2.72048e-07	3.7349	AT5G44070	0.000173042
BnaA09g41970D	2.77367e-07	3.22737	AT2G23450	0.000175147
BnaC02g28720D	2.8136e-07	2.79622	AT5G42750	0.000176391
BnaC02g31570D	2.95567e-07	1.99487	AT5G45410	0.000183974
BnaC03g66230D	3.0395e-07	-4.21872	AT4G34290	0.00018785
BnaC02g42020D	3.06222e-07	3.96393	AT5G61140	0.000187921
BnaA08g07200D	3.09176e-07	-5.32234	AT5G35170	0.000188407
BnaA09g06240D	3.14549e-07	7.16557	AT5G62810	0.00019035
BnaC02g47740D	3.17074e-07	3.29618	AT2G01730	0.000190555
BnaC02g31030D	3.25094e-07	2.21204	AT5G44340	0.000194037
BnaA08g09130D	3.32898e-07	5.84598	AT4G19191	0.000196389
BnaC02g33830D	3.33542e-07	3.10987	AT2G01260	0.000196389
BnaC02g30440D	3.48435e-07	2.47265	AT5G43750	0.000203781
BnaC02g34800D	3.61877e-07	2.94703	AT2G02810	0.000210231
BnaC03g66430D	3.66479e-07	19.8808	AT4G33680	0.000211495
BnaC09g05320D	3.9919e-07	-4.21537	AT3G29410	0.000227581
BnaCnng30160D	3.99577e-07	2.58669	AT5G43320	0.000227581
BnaA09g05840D	4.04988e-07	5.45855	AT5G62000	0.000229166
BnaC02g30000D	4.20009e-07	3.46003	AT1G63610	0.000234711
BnaC02g34200D	4.21293e-07	3.24693	AT3G08650	0.000234711
BnaC02g29300D	4.22868e-07	2.7726	AT4G10120	0.000234711
BnaA08g30710D	4.301e-07	9.41363	AT4G31700	0.000237214
BnaC02g27940D	4.50164e-07	2.28844	AT4G01480	0.000246718
BnaA08g10700D	4.53874e-07	16.6737	AT4G35260	0.000247197
BnaAnng09900D	4.5915e-07	3.37563	/	0.000248517
BnaC02g30020D	4.82936e-07	2.25951	AT5G43010	0.000259778
BnaC02g31850D	4.87635e-07	2.35127	AT5G45775	0.000259867
BnaC02g30340D	4.89066e-07	4.3378	AT5G43720	0.000259867
BnaA08g09730D	5.06571e-07	10.0338	AT4G21450	0.000267537
BnaC02g47300D	5.47951e-07	3.03192	AT5G46030	0.000287648
BnaC02g34370D	5.61749e-07	2.14752	AT2G02160	0.000293125
BnaC02g28980D	5.75221e-07	1.87262	AT4G11010	0.000297687
BnaC02g33880D	5.77323e-07	4.35931	AT2G01290	0.000297687
BnaC02g33400D	5.83776e-07	2.06372	AT5G47640	0.000299244
BnaC02g30280D	5.94537e-07	2.62999	AT5G43500	0.000302978
BnaC02g42120D	6.31566e-07	2.66727	AT5G61220	0.000319976
BnaA08g09800D	6.50895e-07	4.299	/	0.000325713
BnaC02g29760D	6.54014e-07	2.43412	AT5G42150	0.000325713
BnaAnng35740D	6.54102e-07	1.78434	AT2G01850	0.000325713
BnaA02g15680D	6.6738e-07	3.82569	AT1G71950	0.000330073
BnaC02g30260D	6.70434e-07	2.23486	AT1G33140	0.000330073
BnaC02g47770D	6.75121e-07	2.10168	AT2G01820	0.000330513
BnaA02g16420D	7.42148e-07	4.05026	AT1G73380	0.000361297
BnaC02g33250D	7.56925e-07	3.10848	AT5G47150	0.000366444
BnaA08g08330D	7.83897e-07	8.65988	AT4G17520	0.000377405
BnaA08g07360D	7.88711e-07	4.61389	AT5G33370	0.000377637
BnaC02g29290D	8.09094e-07	3.31553	AT4G10140	0.00038323
BnaC02g33310D	8.0919e-07	3.73372	AT5G47520	0.00038323
BnaC02g41630D	8.25817e-07	4.36673	AT5G23440	0.000388991
BnaA09g34620D	8.62085e-07	-3.63311	AT5G62810	0.000403891
BnaC02g26020D	8.69938e-07	2.62719	AT1G80860	0.000405391
BnaCnng60070D	8.75364e-07	-3.23108	AT1G75160	0.00040575
BnaC02g33640D	8.95031e-07	2.72685	AT2G01110	0.000412087
BnaC02g34400D	8.98494e-07	2.36026	AT2G02180	0.000412087
BnaA08g03420D	9.10199e-07	7.45062	/	0.000414579
BnaC02g28890D	9.13442e-07	2.31766	AT4G20330	0.000414579
BnaCnng60970D	9.2071e-07	1.98258	AT5G42570	0.000415713
BnaA08g12550D	9.63859e-07	10.3782	AT4G31300	0.000432951
BnaA08g10030D	9.93779e-07	7.15934	AT4G21810	0.000444102
BnaA08g08940D	1.00766e-06	6.07664	AT4G18880	0.000448008
BnaC02g31730D	1.04661e-06	2.16005	AT5G45510	0.000462961
BnaC02g35410D	1.05417e-06	2.45877	AT3G25540	0.00046395
BnaC02g35270D	1.10728e-06	2.84177	AT2G03870	0.000484879
BnaCnng78760D	1.13099e-06	-3.84737	AT3G50710	0.000492782
BnaC02g28120D	1.14126e-06	2.04061	AT4G02290	0.000494783
BnaC02g33230D	1.1576e-06	1.97599	AT5G47120	0.000499383
BnaC02g29690D	1.16523e-06	2.37601	AT3G57790	0.000500198
BnaC03g77130D	1.22561e-06	1.35618	AT4G33985	0.000521035
BnaA08g08660D	1.22573e-06	10.2636	AT4G18240	0.000521035
BnaC07g02940D	1.2447e-06	-4.54764	/	0.000526531
BnaC02g28870D	1.25903e-06	4.50377	AT4G11160	0.000530022
BnaC02g32140D	1.31283e-06	3.09921	AT5G46210	0.000549313
BnaC02g23240D	1.31746e-06	3.34497	AT1G80260	0.000549313
BnaA02g12020D	1.33281e-06	4.43275	AT1G65260	0.000553066
BnaCnng30150D	1.39083e-06	2.6921	AT4G38680	0.000574343
BnaC02g28710D	1.39727e-06	2.23807	/	0.000574343
BnaC02g30980D	1.41062e-06	3.11718	AT3G20480	0.000577109
BnaA08g11150D	1.4242e-06	13.9148	AT4G34490	0.000579942
BnaC02g26940D	1.43545e-06	3.21735	AT1G65840	0.000581803
BnaA08g12680D	1.50927e-06	13.0254	AT4G31130	0.000608893
BnaC02g27710D	1.51721e-06	2.36655	AT4G01150	0.000609274
BnaA06g14020D	1.58177e-06	3.23186	AT5G57740	0.000632287
BnaC02g27520D	1.59204e-06	2.08457	AT4G00560	0.000633487
BnaAnng19130D	1.60815e-06	7.93544	AT4G17330	0.00063699
BnaA08g12640D	1.67667e-06	3.50001	AT4G31150	0.000661123
BnaAnng17280D	1.71088e-06	2.70526	AT5G42960	0.000671573
BnaC02g28880D	1.74922e-06	1.61105	AT4G11150	0.000683547
BnaC02g46860D	1.79873e-06	3.49747	AT5G47455	0.000699754
BnaC02g31920D	1.82837e-06	2.42902	AT5G45900	0.000706554
BnaC02g34490D	1.83243e-06	2.29106	AT2G02400	0.000706554
BnaC02g33100D	1.86389e-06	2.81352	AT5G47080	0.000715519
BnaC02g18560D	1.93518e-06	3.25162	AT1G53250	0.000739628
BnaC02g46600D	2.0344e-06	2.1617	AT1G80830	0.000774155
BnaC02g34840D	2.04925e-06	2.05257	AT2G02860	0.000776417
BnaC02g46780D	2.08168e-06	2.37628	AT3G57150	0.000785288
BnaA08g13640D	2.09119e-06	6.92505	AT4G28600	0.000785478
BnaC02g31540D	2.11462e-06	2.39363	AT5G45330	0.000790868
BnaCnng23830D	2.14013e-06	3.18897	AT4G11790	0.000792252
BnaC02g34780D	2.14164e-06	2.43831	AT2G02790	0.000792252
BnaC02g36340D	2.14559e-06	2.45037	AT3G26780	0.000792252
BnaC02g29330D	2.17928e-06	3.14736	AT2G07180	0.000800941
BnaA08g30760D	2.18751e-06	4.5064	AT4G28730	0.000800941
BnaC02g47660D	2.21406e-06	2.00833	AT2G01450	0.000807272
BnaAnng27600D	2.30242e-06	8.48267	AT4G16510	0.000833609
BnaCnng61340D	2.30543e-06	3.55913	AT2G07180	0.000833609
BnaC03g60140D	2.37943e-06	14.316	AT4G38710	0.00085556
BnaC02g28790D	2.38577e-06	2.709	AT5G42820	0.00085556
BnaC02g28040D	2.43158e-06	2.48268	AT4G02120	0.000868414
BnaC02g40780D	2.47723e-06	2.38179	AT5G25240	0.000881103
BnaCnng08330D	2.50559e-06	2.00681	AT4G11420	0.00088757
BnaA09g05940D	2.5331e-06	4.69222	AT5G62200	0.000893682
BnaCnng22210D	2.59864e-06	1.87479	AT2G01470	0.000913108
BnaC02g28640D	2.64478e-06	2.1828	AT4G11970	0.000925587
BnaA02g13350D	2.66619e-06	3.1901	AT1G67785	0.00092935
BnaC02g31300D	2.73119e-06	1.73412	AT5G45040	0.000947422
BnaA09g06260D	2.73978e-06	5.18536	AT3G48050	0.000947422
BnaC02g23260D	2.77909e-06	4.29768	AT1G80190	0.000957214
BnaA08g10510D	2.7977e-06	11.2089	AT4G22920	0.000959831
BnaC02g39890D	2.8118e-06	2.73101	AT5G27840	0.000960886
BnaC02g33270D	2.8241e-06	4.95384	AT5G47180	0.000961318
BnaA08g08360D	2.86862e-06	11.6162	AT4G17560	0.000972675
BnaA08g09060D	2.9893e-06	6.88546	AT4G19120	0.00100875
BnaA08g13660D	2.99817e-06	5.16478	AT4G28540	0.00100875
BnaC02g39800D	3.06327e-06	2.03436	AT5G27670	0.00102669
BnaC02g33260D	3.11573e-06	1.91895	AT5G47150	0.00104027
BnaC02g27370D	3.1417e-06	1.48819	AT4G02400	0.00104105
BnaA08g30220D	3.14194e-06	14.305	AT4G17170	0.00104105
BnaA08g11390D	3.19295e-06	3.71666	AT4G34135	0.00105394
BnaC02g42030D	3.23901e-06	3.86775	AT5G61140	0.0010629
BnaA02g12350D	3.24449e-06	2.31867	AT1G66080	0.0010629
BnaA08g06560D	3.25811e-06	-10.2113	AT1G33980	0.00106336
BnaA04g20070D	3.28694e-06	2.16653	AT2G34260	0.00106877
BnaAnng27210D	3.33559e-06	8.94383	AT4G19900	0.00108056
BnaA02g35640D	3.38195e-06	4.78674	AT1G68730	0.00109152
BnaC02g28130D	3.41338e-06	2.15665	AT4G02370	0.0010976
BnaC02g47890D	3.53751e-06	3.05655	AT1G79890	0.00113333
BnaA08g09340D	3.55467e-06	7.33234	AT4G19830	0.00113444
BnaC02g46570D	3.567e-06	2.35091	AT1G80600	0.00113444
BnaC02g47130D	3.66893e-06	5.66218	AT5G46110	0.00116261
BnaA08g12190D	3.761e-06	-13.5864	AT4G32470	0.00118747
BnaC02g41500D	3.81971e-06	2.608	AT5G24030	0.00120165
BnaC02g33580D	3.85364e-06	1.34793	AT2G01100	0.00120796
BnaA09g30040D	3.94481e-06	4.4523	AT1G23205	0.00123211
BnaCnng39420D	4.11317e-06	3.23798	AT2G02880	0.00128011
BnaAnng22940D	4.24978e-06	3.03064	AT3G25660	0.00131792
BnaC02g29270D	4.32343e-06	2.28027	AT4G10150	0.001336
BnaCnng39410D	4.36419e-06	2.39974	AT2G02870	0.00134383
BnaA02g14660D	4.42298e-06	4.18233	AT1G69250	0.00135714
BnaC02g26880D	4.62459e-06	2.1746	AT4G02820	0.00141402
BnaA02g15580D	4.66537e-06	1.13176	AT2G46960	0.00141662
BnaC02g32530D	4.66559e-06	2.48929	AT5G46620	0.00141662
BnaC02g34830D	4.93402e-06	2.15893	AT2G02850	0.0014911
BnaC02g34060D	4.94512e-06	1.6737	AT2G01620	0.0014911
BnaC03g64540D	5.14843e-06	4.89635	AT4G21710	0.00154705
BnaC02g33160D	5.28845e-06	2.16335	AT5G47110	0.00158366
BnaA08g10100D	5.40302e-06	5.50831	AT5G11250	0.00161243
BnaC02g27040D	5.60347e-06	1.98735	AT4G02590	0.00166654
BnaA08g09410D	5.65795e-06	4.81689	AT4G20380	0.00167703
BnaA08g30400D	5.79816e-06	3.76858	AT4G20150	0.00170911
BnaAnng17270D	5.80544e-06	1.24573	AT5G42970	0.00170911
BnaA08g08190D	5.87593e-06	8.70623	AT4G17060	0.0017215
BnaC02g39760D	5.88703e-06	4.01345	AT5G27540	0.0017215
BnaA08g12610D	6.15476e-06	-8.83562	AT4G31270	0.00178939
BnaA08g04960D	6.16027e-06	-2.64132	AT1G77230	0.00178939
BnaC02g23170D	6.49448e-06	2.36549	AT1G80350	0.00188021
BnaC02g34010D	6.52532e-06	1.55582	AT2G01600	0.00188288
BnaAnng25040D	6.56463e-06	1.0708	AT1G27370	0.00188797
BnaC02g32010D	6.65597e-06	3.40877	AT5G45960	0.00190794
BnaA08g12430D	6.97121e-06	-6.94411	AT4G31540	0.00198847
BnaC02g28800D	6.98255e-06	2.89607	AT5G42820	0.00198847
BnaA08g07170D	7.02398e-06	-9.88881	AT5G35100	0.00199376
BnaA08g30180D	7.15377e-06	5.10115	AT4G14570	0.00201823
BnaC02g35840D	7.1565e-06	2.66281	AT3G25970	0.00201823
BnaA02g14670D	7.38439e-06	1.76369	AT1G55750	0.00207577
BnaC02g32900D	7.41115e-06	3.24028	AT5G46910	0.0020766
BnaC03g65810D	7.4754e-06	12.3233	AT4G34710	0.00208789
BnaC02g30140D	7.55672e-06	1.84078	AT3G16290	0.00210386
BnaC02g23210D	7.61896e-06	2.08223	AT1G80290	0.00211443
BnaC02g26310D	7.76287e-06	2.9141	AT4G12570	0.00214753
BnaC02g33410D	7.81912e-06	2.76531	AT5G47650	0.00215343
BnaA02g14180D	7.83361e-06	4.37711	AT1G68920	0.00215343
BnaC02g38260D	8.10025e-06	2.31999	AT5G47830	0.00221972
BnaA08g08550D	8.12903e-06	10.4829	AT4G18100	0.00222063
BnaC05g11050D	8.1559e-06	3.02966	AT1G80040	0.002221
BnaC07g10310D	8.54515e-06	-19.0499	/	0.00231976
BnaC02g33540D	8.59163e-06	2.20687	AT2G01080	0.00232023
BnaC03g68360D	8.60014e-06	7.77105	AT1G49890	0.00232023
BnaA02g18940D	8.74915e-06	4.19879	AT1G78590	0.00234598
BnaCnng49530D	8.74944e-06	2.95566	AT5G48655	0.00234598
BnaC02g27480D	8.83308e-06	2.63175	AT4G00520	0.00236114
BnaA09g04730D	8.98385e-06	-11.6959	AT5G10740	0.0023941
BnaC02g39780D	9.11804e-06	3.58208	AT5G27620	0.00242245
BnaA08g29440D	9.18466e-06	9.25568	AT4G14720	0.00243273
BnaC02g28500D	9.22447e-06	2.32104	AT4G12250	0.00243587
BnaA09g06740D	9.52507e-06	3.97224	AT5G64180	0.00250765
BnaA08g06980D	9.5567e-06	-4.85828	AT1G76065	0.0025084
BnaC02g30940D	9.5927e-06	1.77138	AT5G44240	0.00250997
BnaC02g28020D	9.66556e-06	2.25178	AT4G01730	0.00250997
BnaCnng70910D	9.79444e-06	1.90421	AT4G11420	0.00250997
BnaC02g33390D	1.00505e-05	2.84208	AT5G47630	0.00250997
BnaC02g36060D	1.00571e-05	2.28078	AT3G26360	0.00250997
BnaC03g64530D	1.01026e-05	4.08485	AT4G21710	0.00250997
BnaA08g05690D	1.01315e-05	10.8784	AT4G15470	0.00250997
BnaC02g34790D	1.01545e-05	2.59464	AT2G02800	0.00250997
BnaC02g36250D	1.02122e-05	3.7994	AT3G26670	0.00250997
BnaA08g11480D	1.02154e-05	6.41141	AT4G33670	0.00250997
BnaA09g05850D	1.02986e-05	8.06865	AT5G02500	0.00250997
BnaC02g26540D	1.03403e-05	-22.7975	/	0.00250997
BnaC02g26550D	1.03403e-05	-22.7975	/	0.00250997
BnaC02g26560D	1.03403e-05	-22.7975	/	0.00250997
BnaC02g26570D	1.03403e-05	-22.7975	/	0.00250997
BnaC02g26580D	1.03403e-05	-22.7975	/	0.00250997
BnaC02g26590D	1.03403e-05	-22.7975	/	0.00250997
BnaC02g26600D	1.03403e-05	-22.7975	/	0.00250997
BnaC02g26610D	1.03403e-05	-22.7975	/	0.00250997
BnaC02g26620D	1.03403e-05	-22.7975	/	0.00250997
BnaC02g26630D	1.03403e-05	-22.7975	/	0.00250997
BnaC02g26640D	1.03403e-05	-22.7975	/	0.00250997
BnaC02g26650D	1.03403e-05	-22.7975	/	0.00250997
BnaC02g26660D	1.03403e-05	-22.7975	/	0.00250997
BnaC02g26670D	1.03403e-05	-22.7975	/	0.00250997
BnaC02g26680D	1.03403e-05	-22.7975	/	0.00250997
BnaC02g26690D	1.03403e-05	-22.7975	/	0.00250997
BnaA02g35840D	1.04244e-05	1.6323	AT1G70180	0.00252333
BnaCnng52820D	1.04792e-05	3.39566	AT4G01100	0.00252957
BnaA08g08350D	1.06759e-05	7.36573	AT4G17550	0.00256899
BnaC02g28000D	1.07014e-05	2.36896	AT4G01590	0.00256899
BnaA02g36270D	1.09572e-05	2.85343	AT1G80750	0.00261613
BnaA08g14490D	1.09578e-05	-5.8987	AT4G26080	0.00261613
BnaA08g30310D	1.11094e-05	4.35959	AT4G16610	0.00264506
BnaC02g15040D	1.13183e-05	2.34444	AT5G52520	0.00268747
BnaA09g33340D	1.15251e-05	1.90697	AT3G52990	0.00272913
BnaA08g03430D	1.1807e-05	13.17	/	0.00278832
BnaC02g30320D	1.18883e-05	3.60834	AT5G43710	0.00279992
BnaCnng54340D	1.2179e-05	3.99004	AT5G47920	0.00286066
BnaA02g06490D	1.2309e-05	7.77853	AT5G60120	0.00288341
BnaC02g39740D	1.25044e-05	3.42428	AT5G27470	0.00292135
BnaC02g33940D	1.27214e-05	2.70763	AT2G01350	0.00296408
BnaC02g27290D	1.27833e-05	2.60489	AT4G02460	0.00296533
BnaA08g11950D	1.27948e-05	-6.14483	AT4G33000	0.00296533
BnaAnng19250D	1.29198e-05	-7.44333	AT4G37790	0.00298359
BnaA07g14200D	1.29421e-05	1.67273	AT5G37830	0.00298359
BnaC03g62040D	1.30101e-05	12.8511	AT4G36130	0.00299137
BnaC02g28010D	1.3089e-05	2.48888	/	0.00299475
BnaCnng26060D	1.30936e-05	-4.53627	/	0.00299475
BnaA02g14760D	1.32437e-05	3.15821	AT1G70160	0.00302115
BnaC03g61250D	1.3279e-05	-6.5342	AT4G37810	0.0030213
BnaA02g20140D	1.34918e-05	1.87183	AT1G64970	0.0030551
BnaCnng54330D	1.34977e-05	1.94467	AT5G47930	0.0030551
BnaAnng21820D	1.35577e-05	3.12942	AT4G28360	0.00306075
BnaC02g34080D	1.38571e-05	2.99815	AT2G01640	0.00311691
BnaA08g09210D	1.3878e-05	3.49094	AT4G19500	0.00311691
BnaCnng22230D	1.4685e-05	1.76638	AT2G01490	0.00328966
BnaC02g37910D	1.48803e-05	1.80863	AT3G29320	0.00332487
BnaC03g60490D	1.50276e-05	7.45323	AT4G39260	0.00334919
BnaCnng22200D	1.53274e-05	1.94954	AT2G01460	0.00340729
BnaCnng23940D	1.57486e-05	1.89829	AT5G61020	0.00349202
BnaC02g22970D	1.60431e-05	3.06947	AT2G26000	0.0035483
BnaA02g16510D	1.62028e-05	3.4661	AT1G73650	0.00357455
BnaC02g32740D	1.6563e-05	3.79892	AT5G46800	0.00364478
BnaA09g37450D	1.72684e-05	5.56371	AT3G58500	0.00379043
BnaC03g77150D	1.7334e-05	4.84002	AT4G02570	0.00379528
BnaA08g06240D	1.77932e-05	-3.69274	/	0.00387635
BnaC05g19240D	1.77932e-05	-3.69274	/	0.00387635
BnaC02g26080D	1.84689e-05	0.703021	AT4G04620	0.00400888
BnaC02g32920D	1.84936e-05	2.5899	AT5G46940	0.00400888
BnaA08g11600D	1.85805e-05	13.2678	AT5G11760	0.00401772
BnaC02g33330D	1.89028e-05	3.15082	AT5G47540	0.0040773
BnaC02g29660D	1.89995e-05	4.21781	AT5G66750	0.00408804
BnaC02g29360D	1.91834e-05	4.66122	AT4G10030	0.00411743
BnaA08g06750D	1.99188e-05	4.19366	/	0.00426477
BnaC02g28060D	2.04731e-05	2.3626	AT4G02150	0.00437271
BnaC02g48350D	2.15655e-05	2.74796	AT5G18180	0.00459476
BnaA08g08750D	2.24408e-05	5.78136	/	0.00476959
BnaA02g14230D	2.25042e-05	0.294785	AT1G69030	0.00477145
BnaA09g06220D	2.29726e-05	4.35887	AT5G62770	0.00485193
BnaA06g16160D	2.29952e-05	-3.26824	AT3G49120	0.00485193
BnaAnng38470D	2.34715e-05	3.33636	/	0.00494046
BnaC02g47480D	2.38517e-05	2.73021	AT5G45190	0.00500841
BnaA02g15650D	2.40134e-05	0.634665	AT1G71920	0.00503023
BnaC02g41910D	2.42433e-05	2.60606	AT5G60980	0.00506622
BnaA08g07270D	2.45254e-05	-4.55811	AT5G34850	0.0051129
BnaA08g09030D	2.49676e-05	9.85302	AT4G19112	0.00518955
BnaCnng39450D	2.50122e-05	3.13034	AT2G02980	0.00518955
BnaC02g42040D	2.51698e-05	4.04158	AT5G61150	0.00520985
BnaC02g39980D	2.52824e-05	3.43426	AT5G27030	0.00522075
BnaA09g05660D	2.54059e-05	5.18148	AT5G61330	0.00523048
BnaC02g34300D	2.54495e-05	2.11321	AT2G02070	0.00523048
BnaA08g13980D	2.56409e-05	4.59939	AT4G27900	0.0052527
BnaC03g62010D	2.56782e-05	2.9006	AT4G36150	0.0052527
BnaA10g24140D	2.57618e-05	-5.2254	AT4G34710	0.00525745
BnaC02g35830D	2.61523e-05	2.18359	AT3G25930	0.00532469
BnaC02g48360D	2.63576e-05	2.15438	AT5G26860	0.00535396
BnaA07g31540D	2.6478e-05	1.79372	AT1G74430	0.00536593
BnaC03g64520D	2.71356e-05	9.68681	AT4G20930	0.0054835
BnaA03g49680D	2.71841e-05	-1.67283	AT1G14350	0.0054835
BnaC02g26000D	2.75119e-05	1.83963	AT1G80870	0.00553682
BnaC02g29900D	2.85699e-05	5.02234	/	0.0057365
BnaA08g08560D	2.87883e-05	3.93397	AT4G18150	0.00576706
BnaC03g68230D	2.91189e-05	-3.01911	AT5G63820	0.0058199
BnaA02g12820D	2.91899e-05	3.62883	AT1G67080	0.00582075
BnaA09g29800D	2.92662e-05	5.25049	AT1G24095	0.00582263
BnaCnng66340D	2.95261e-05	2.41155	AT2G21160	0.00586096
BnaC02g33980D	2.99068e-05	2.18216	AT2G01540	0.00592304
BnaC02g26490D	2.99899e-05	2.72397	AT4G03180	0.00592603
BnaA08g27160D	3.03009e-05	-2.82903	AT1G02520	0.00597394
BnaC02g31090D	3.04522e-05	4.21128	AT5G44635	0.00598377
BnaC02g33670D	3.04881e-05	1.88308	AT2G01150	0.00598377
BnaC02g32440D	3.06472e-05	4.43627	AT3G18295	0.00600149
BnaA08g29450D	3.10965e-05	7.29671	AT4G14660	0.00607581
BnaC02g37870D	3.19895e-05	2.40143	AT3G29280	0.00623631
BnaC02g33050D	3.27163e-05	2.21112	AT5G47030	0.00636375
BnaCnng60170D	3.28305e-05	3.64796	AT1G80230	0.00636531
BnaC02g33700D	3.29038e-05	1.4133	AT2G01170	0.00636531
BnaA06g13840D	3.29434e-05	3.06011	AT1G19690	0.00636531
BnaA02g15050D	3.30195e-05	2.42723	AT1G70620	0.00636589
BnaC02g41610D	3.41681e-05	2.15079	AT5G23480	0.00657279
BnaC02g35120D	3.43024e-05	2.60353	AT2G03730	0.0065841
BnaA08g09440D	3.46415e-05	4.96662	AT4G20420	0.00663458
BnaC03g65000D	3.50737e-05	5.67589	AT4G22550	0.00670262
BnaC02g22980D	3.52588e-05	1.61591	AT1G80560	0.00671601
BnaA02g15550D	3.52979e-05	2.77771	/	0.00671601
BnaCnng23900D	3.56339e-05	2.65986	AT1G64860	0.00676515
BnaC02g36140D	3.64568e-05	2.09995	/	0.00690634
BnaC02g41860D	3.67163e-05	3.68089	AT5G60890	0.00694042
BnaC02g27390D	3.69306e-05	2.42742	AT4G00300	0.00696581
BnaA02g15710D	3.71654e-05	1.24924	AT1G72010	0.00698454
BnaC02g30290D	3.71902e-05	2.15189	/	0.00698454
BnaA09g52390D	3.77449e-05	5.46597	AT5G63890	0.00707347
BnaC06g18480D	3.84412e-05	-5.61264	/	0.0071885
BnaC02g48430D	3.85657e-05	3.69488	AT5G26742	0.00719386
BnaC02g41800D	3.8635e-05	4.5623	AT5G08130	0.00719386
BnaC02g35850D	3.90894e-05	3.08196	AT3G25990	0.00726296
BnaC02g34580D	3.95604e-05	1.36918	AT2G02510	0.00733483
BnaC02g48480D	3.98227e-05	2.21607	AT5G26820	0.0073678
BnaC04g28540D	4.01729e-05	1.92005	AT1G65800	0.00741262
BnaC03g58350D	4.02351e-05	4.59076	AT1G28200	0.00741262
BnaA10g02710D	4.06216e-05	2.28944	AT1G04570	0.00745795
BnaC09g29520D	4.06523e-05	7.73983	AT3G07860	0.00745795
BnaC02g47610D	4.12234e-05	2.6227	AT2G01400	0.00754559
BnaC02g34380D	4.13033e-05	2.72433	AT2G02170	0.00754559
BnaC03g62030D	4.16573e-05	3.38239	AT4G36140	0.00759082
BnaC02g48760D	4.17251e-05	2.93088	AT5G24500	0.00759082
BnaA08g29910D	4.34086e-05	-5.27425	AT2G06520	0.00788065
BnaC02g39290D	4.37078e-05	4.44937	AT5G29000	0.00791847
BnaC02g39720D	4.39902e-05	3.31337	AT5G27450	0.00795309
BnaC02g40790D	4.47892e-05	2.11495	AT5G25220	0.00808078
BnaC03g49130D	4.54517e-05	3.15907	/	0.00818338
BnaC02g47990D	4.68835e-05	2.53537	AT2G03510	0.00842376
BnaA02g13120D	4.71158e-05	0.420033	AT1G67410	0.00844808
BnaC03g64570D	4.76589e-05	4.58633	AT4G04890	0.0085279
BnaA02g12140D	4.88612e-05	0.785993	AT1G65520	0.00872513
BnaA08g02680D	4.97274e-05	-7.55666	AT1G49450	0.00886164
BnaC02g38740D	4.9869e-05	2.2851	AT5G48760	0.00886873
BnaCnng48390D	5.05673e-05	-6.40568	/	0.00895714
BnaC02g39430D	5.06528e-05	2.34957	AT5G28590	0.00895714
BnaC02g40260D	5.06744e-05	3.58011	AT1G56070	0.00895714
BnaA09g54630D	5.08797e-05	3.13318	AT1G23980	0.00896716
BnaA02g15600D	5.09369e-05	4.23634	AT5G41690	0.00896716
BnaA08g02650D	5.11593e-05	12.483	AT1G49480	0.00898816
BnaA08g11900D	5.13598e-05	4.70815	AT4G33100	0.00899589
BnaC02g41600D	5.14098e-05	2.22077	AT5G23540	0.00899589
BnaA08g08510D	5.31558e-05	6.94669	AT4G17950	0.00928277
BnaA02g30860D	5.49811e-05	-2.83733	/	0.00958232
BnaC02g39840D	5.56067e-05	4.05654	AT5G27740	0.00967201
BnaC02g38760D	5.85759e-05	3.20558	AT5G48830	0.0101682
BnaC03g77140D	5.87447e-05	1.13486	AT1G43140	0.0101772
BnaC02g38790D	5.89053e-05	2.17142	AT5G48870	0.0101848
BnaC02g35690D	5.92686e-05	2.46607	AT3G25870	0.0102273
BnaAnng21330D	5.96466e-05	-4.94444	/	0.0102607
BnaA02g18790D	5.96975e-05	2.05278	AT1G78150	0.0102607
BnaA02g14800D	6.06132e-05	1.39097	AT1G56130	0.0103975
BnaC08g01470D	6.07689e-05	-4.30343	AT1G05700	0.0104038
BnaA08g11370D	6.10994e-05	-2.79731	AT4G34138	0.0104398
BnaCnng66620D	6.17082e-05	3.23493	AT1G11430	0.0105232
BnaC02g41560D	6.20717e-05	1.74739	AT5G23740	0.0105646
BnaA08g09870D	6.29275e-05	5.76388	/	0.0106893
BnaA03g40340D	6.30609e-05	3.5799	AT5G61570	0.0106912
BnaC03g76260D	6.33742e-05	5.84822	AT4G39730	0.0107234
BnaC02g36240D	6.36065e-05	2.48078	AT3G26650	0.0107419
BnaC02g36630D	6.45978e-05	2.26254	AT3G27060	0.0108882
BnaA08g29810D	6.52745e-05	-9.61736	AT1G43670	0.010981
BnaC03g67830D	6.566e-05	10.2664	AT4G30935	0.0110246
BnaA08g07320D	6.65781e-05	-10.6433	AT5G33320	0.0111572
BnaC02g27280D	6.71354e-05	3.08879	AT4G02480	0.011229
BnaA08g30360D	6.75291e-05	6.60946	AT4G16690	0.0112732
BnaA08g26940D	6.80616e-05	1.58876	AT1G08450	0.0113404
BnaA08g11420D	6.83841e-05	2.12017	AT4G33860	0.0113724
BnaC08g48260D	6.92362e-05	12.7733	AT4G16800	0.0114922
BnaAnng06990D	7.01169e-05	-4.80934	AT5G51860	0.0116162
BnaAnng28440D	7.11506e-05	2.64152	AT5G66920	0.0117651
BnaC02g13370D	7.25593e-05	2.25058	AT5G55070	0.0119753
BnaA09g28970D	7.30031e-05	4.90278	AT1G26520	0.0120258
BnaA08g07870D	7.41887e-05	-11.1479	AT1G31440	0.012198
BnaC02g40060D	7.46213e-05	2.56532	AT5G26760	0.012246
BnaA02g16450D	7.48313e-05	3.14202	AT1G73470	0.0122574
BnaA01g23280D	7.50819e-05	-3.8055	AT1G07430	0.0122754
BnaC02g39790D	7.5423e-05	4.40965	AT5G27630	0.0123081
BnaA02g36050D	7.57451e-05	3.01661	AT1G77740	0.0123375
BnaA08g29940D	7.7226e-05	-10.4963	AT5G35620	0.0125553
BnaC02g40200D	7.772e-05	2.11841	AT5G26210	0.012594
BnaCnng42110D	7.77534e-05	2.40234	AT4G11260	0.012594
BnaA08g08290D	7.8046e-05	3.71038	AT4G17486	0.012618
BnaC02g38230D	7.83921e-05	1.9759	AT3G30775	0.0126505
BnaA02g13510D	7.90428e-05	1.0867	AT1G68000	0.0127319
BnaC02g46520D	7.99814e-05	4.41049	AT1G80670	0.0128593
BnaC02g28700D	8.07281e-05	1.73621	/	0.0129554
BnaAnng29860D	8.19408e-05	8.5883	AT4G15410	0.013113
BnaC02g39900D	8.20107e-05	2.35302	AT5G27850	0.013113
BnaA08g09970D	8.34043e-05	13.5127	AT4G20960	0.0133114
BnaC02g28660D	8.42203e-05	1.6331	AT5G42655	0.0134154
BnaC02g31470D	8.43636e-05	3.3735	AT5G45275	0.0134154
BnaA08g29720D	8.46156e-05	-7.68093	AT1G42540	0.0134309
BnaCnng52550D	8.50205e-05	3.63702	/	0.0134509
BnaC04g13940D	8.50499e-05	-17.1554	/	0.0134509
BnaC02g28070D	8.56358e-05	2.14128	AT4G02210	0.013519
BnaC02g41080D	8.66364e-05	2.62396	AT5G24750	0.0136522
BnaC02g46730D	8.73173e-05	1.95529	AT4G12400	0.0137347
BnaAnng20100D	8.74858e-05	1.99251	AT1G73230	0.0137364
BnaC09g04590D	8.87458e-05	-2.36936	AT3G22290	0.0138897
BnaCnng39460D	8.87808e-05	1.64897	AT2G02990	0.0138897
BnaA08g30650D	9.0775e-05	-5.84	AT4G32250	0.0141762
BnaC02g44130D	9.27895e-05	1.79846	AT5G17520	0.0144649
BnaA06g14670D	9.77802e-05	5.87235	AT1G20830	0.0152078
BnaC02g35890D	9.79042e-05	3.66249	AT3G26100	0.0152078
BnaC08g22240D	9.82367e-05	3.7541	AT3G50850	0.0152323
BnaA05g05850D	9.8893e-05	-3.47973	AT2G39720	0.0153068
BnaC03g66180D	9.91597e-05	-2.24315	AT4G34360	0.0153209
BnaC07g31180D	0.000100118	-5.71002	AT5G61340	0.0154416
BnaC03g78040D	0.000101748	4.78311	AT1G51350	0.0156653
BnaA02g15950D	0.000103586	3.17993	AT1G72340	0.0159201
BnaC02g35630D	0.000104594	3.32143	AT3G25700	0.0160348
BnaC09g30250D	0.0001047	-2.09891	AT5G53890	0.0160348
BnaA08g09760D	0.000105252	3.92059	AT4G21215	0.0160724
BnaA09g07020D	0.000105315	5.89717	AT5G64813	0.0160724
BnaC02g35980D	0.000105623	2.04153	AT3G26210	0.0160821
BnaA02g35650D	0.000105747	0.0949457	AT1G68720	0.0160821
BnaC02g45060D	0.000107222	0.930862	AT5G66100	0.0162434
BnaA02g13720D	0.000107314	2.5966	AT1G68310	0.0162434
BnaC04g34800D	0.000107367	4.66617	AT4G12750	0.0162434
BnaAnng21370D	0.000108695	3.92374	AT1G76010	0.0164158
BnaA08g09630D	0.000110482	13.6125	AT4G21660	0.0166568
BnaA09g06810D	0.000111304	-2.83614	AT5G64350	0.0167518
BnaC02g40470D	0.00011166	3.89491	AT5G25800	0.0167764
BnaA03g23510D	0.000111912	-4.34637	AT5G50750	0.0167853
BnaCnng19500D	0.00011226	-3.05249	/	0.0168085
BnaA05g20080D	0.000112723	2.29763	AT3G20830	0.0168489
BnaA08g11970D	0.00011303	-6.39626	AT4G32915	0.0168653
BnaC02g39060D	0.00011322	2.22049	AT5G49400	0.0168653
BnaC02g35470D	0.000114494	2.68255	AT3G25545	0.017026
BnaCnng45890D	0.000115088	1.52529	AT3G26330	0.0170852
BnaCnng39980D	0.000115676	3.75496	AT4G37080	0.0171433
BnaA02g12760D	0.000116008	1.3025	AT1G67040	0.0171633
BnaC03g07370D	0.000117007	-1.63819	AT1G28200	0.0172618
BnaC08g37350D	0.000117178	5.44385	AT3G17900	0.0172618
BnaC02g34420D	0.000117269	2.60461	AT2G02230	0.0172618
BnaC02g36650D	0.00011985	1.47323	AT3G27090	0.0176079
BnaC02g12740D	0.000120024	2.12224	AT5G55920	0.0176079
BnaC02g42360D	0.000121266	2.47998	AT5G62910	0.0177603
BnaA06g13890D	0.00012297	3.27045	AT1G19720	0.0179797
BnaCnng65700D	0.00012393	2.19231	AT5G19290	0.0180798
BnaA02g17850D	0.00012407	1.98101	AT1G76900	0.0180798
BnaC02g47790D	0.000125799	2.46134	AT2G02240	0.0183011
BnaAnng08880D	0.00012799	8.17828	AT4G13850	0.0185732
BnaA04g05930D	0.000128096	4.79522	AT4G36070	0.0185732
BnaA08g02960D	0.000129051	-8.41417	AT1G48880	0.0186806
BnaUnng04840D	0.000130328	2.41567	/	0.0188343
BnaAnng31890D	0.000131879	2.66449	AT2G36530	0.0190268
BnaC08g14730D	0.000133951	-1.9467	AT1G11170	0.0192938
BnaC09g20500D	0.000134588	-10.3009	AT2G01340	0.0193535
BnaA02g12910D	0.000136012	-0.181094	AT1G67170	0.0195262
BnaC02g42330D	0.000137762	2.19008	AT5G62865	0.0197449
BnaC09g37010D	0.000139359	3.42255	AT5G20885	0.0199338
BnaC01g38400D	0.000139839	-5.03935	/	0.0199338
BnaA08g10410D	0.000139962	11.6343	AT4G22670	0.0199338
BnaA09g06140D	0.000139995	-3.82036	AT5G62580	0.0199338
BnaC09g53330D	0.000140488	1.96728	AT5G57190	0.0199714
BnaAnng23110D	0.000140733	-2.25333	AT1G17030	0.0199736
BnaA08g13480D	0.000141082	1.86634	AT4G29260	0.0199905
BnaA08g05340D	0.000142129	-8.03767	AT4G14500	0.0201062
BnaCnng49520D	0.000142631	2.79383	AT5G48660	0.0201445
BnaA02g35550D	0.00014336	1.52377	AT1G71130	0.0202054
BnaC02g41640D	0.000143526	1.47429	AT5G23420	0.0202054
BnaA02g14250D	0.000143945	1.59605	AT1G69340	0.0202317
BnaC02g48120D	0.000144289	1.90563	AT3G26890	0.0202474
BnaC07g41080D	0.000145509	3.45238	AT4G27890	0.0203858
BnaA08g09530D	0.000147352	4.61242	AT4G20880	0.0205889
BnaA02g18780D	0.000147432	2.07013	AT1G78140	0.0205889
BnaC02g28490D	0.000147673	6.82716	AT4G25150	0.0205896
BnaCnng61390D	0.000149324	-3.85273	AT5G63580	0.0207866
BnaC02g26350D	0.000149694	2.40699	AT4G04720	0.0207999
BnaC02g40190D	0.000149897	1.9603	AT5G26180	0.0207999
BnaC03g69300D	0.000151988	5.28425	AT1G52310	0.0210565
BnaA08g16800D	0.000152418	2.79736	AT4G34660	0.0210826
BnaA10g08040D	0.000152746	4.11457	AT5G51400	0.0210945
BnaA08g14500D	0.000155103	2.29636	AT4G25300	0.0213616
BnaA02g33520D	0.000155651	-4.7877	AT5G62670	0.0213616
BnaC02g21290D	0.000155833	1.95035	/	0.0213616
BnaC02g33350D	0.000155852	1.86127	AT5G47560	0.0213616
BnaC02g12940D	0.000156163	2.44394	AT1G60700	0.0213616
BnaC03g77290D	0.000156235	10.3756	AT4G31600	0.0213616
BnaA03g11920D	0.000156396	-1.7838	AT5G54300	0.0213616
BnaA08g30240D	0.000157362	9.3751	AT4G17230	0.0214598
BnaA02g12080D	0.0001581	2.60883	AT1G65410	0.0215268
BnaA03g08050D	0.000158554	1.46119	AT5G20270	0.0215549
BnaA03g09950D	0.000161204	1.65181	AT5G58030	0.0218809
BnaA08g30740D	0.000161454	3.06111	AT4G29010	0.0218809
BnaC02g48030D	0.000162393	2.60529	AT5G47590	0.021943
BnaA08g30480D	0.000162416	7.40222	AT4G20360	0.021943
BnaC02g32930D	0.000163484	3.13311	AT5G47600	0.0220531
BnaA08g10190D	0.000166207	7.08721	AT1G53360	0.0223858
BnaC02g37830D	0.000168025	1.47998	AT3G29270	0.0225957
BnaA03g30030D	0.000169134	1.15595	AT3G07460	0.0227099
BnaA04g12710D	0.000173547	2.85127	AT2G22230	0.0232666
BnaC03g37650D	0.000178589	2.97472	AT3G12520	0.0239057
BnaA08g02470D	0.00018105	-7.56454	AT1G49670	0.0241979
BnaC08g28640D	0.00018262	3.44054	AT3G57630	0.0243571
BnaA03g56380D	0.0001828	-3.33721	AT2G36450	0.0243571
BnaC07g08600D	0.000185108	-2.58064	AT2G30060	0.024627
BnaA02g15800D	0.0001874	0.462925	AT1G72130	0.0248939
BnaA07g30270D	0.000189228	2.48727	AT1G72530	0.0250985
BnaA08g08570D	0.000190639	-5.86675	/	0.0252472
BnaC02g42500D	0.000191895	2.36815	AT5G63370	0.0253749
BnaA02g18710D	0.000192737	1.52003	AT1G78050	0.0254477
BnaA02g15110D	0.000193804	1.8795	AT1G70690	0.0255499
BnaA03g23240D	0.000197109	-3.01409	AT5G49700	0.0259464
BnaC02g33470D	0.000197955	3.30195	AT5G47710	0.0260184
BnaC08g50030D	0.000199099	1.91866	AT1G09340	0.026092
BnaA09g38200D	0.000199114	1.24726	AT3G59950	0.026092
BnaC04g13320D	0.000200787	1.97721	/	0.0262345
BnaC03g62020D	0.000200803	3.82137	AT5G11250	0.0262345
BnaA02g15380D	0.000204932	2.11133	AT1G71696	0.0267338
BnaA08g10440D	0.000208122	-3.07141	AT1G20960	0.0270666
BnaA09g06770D	0.000208367	5.34126	AT5G64270	0.0270666
BnaC03g57170D	0.000208415	-2.97195	AT3G47710	0.0270666
BnaA08g01730D	0.000209969	-7.36009	/	0.0272278
BnaA02g15970D	0.000213579	1.24952	AT1G72390	0.0276548
BnaA08g05000D	0.000214834	4.52397	AT5G40450	0.0277761
BnaAnng11250D	0.000215327	8.69194	AT1G30890	0.0277985
BnaA02g12340D	0.000215749	2.49741	AT1G66070	0.0278118
BnaC02g42260D	0.000216716	-2.92998	AT5G62680	0.0278952
BnaC09g05260D	0.000217163	-6.44535	AT5G61390	0.0279115
BnaC02g05200D	0.0002187	1.81319	AT5G14240	0.0280676
BnaA05g09790D	0.000219387	2.16571	AT2G33860	0.0281145
BnaC02g34100D	0.000221516	2.35639	AT2G01690	0.0283456
BnaC02g39880D	0.000222476	1.97408	AT5G27820	0.0284266
BnaA08g10640D	0.000223744	4.95068	AT4G23530	0.0285469
BnaA02g15640D	0.000225056	1.25445	AT1G71900	0.0286723
BnaA04g29080D	0.000225571	2.30716	AT2G35040	0.028696
BnaA10g07130D	0.000228778	-2.0911	AT5G53890	0.0290614
BnaC02g38680D	0.00023053	1.79535	AT5G48580	0.0292414
BnaA03g19410D	0.000231055	1.14635	AT2G41310	0.0292458
BnaC05g11020D	0.000231236	2.26359	AT1G79960	0.0292458
BnaA05g25270D	0.000231725	1.3049	AT3G14200	0.0292652
BnaC02g41700D	0.000236572	1.35308	AT5G23230	0.0298341
BnaCnng10890D	0.000237474	1.42322	AT3G20330	0.0299046
BnaC02g41690D	0.000242852	1.29191	AT5G23260	0.0304995
BnaC02g12760D	0.000242898	1.7514	AT5G55910	0.0304995
BnaA08g14300D	0.000243304	5.23448	AT4G26780	0.0305065
BnaCnng78750D	0.000244671	7.0107	AT5G35790	0.0305655
BnaA08g08180D	0.000244699	6.49716	AT4G17060	0.0305655
BnaA08g11050D	0.000244827	11.4027	AT4G34660	0.0305655
BnaA05g02720D	0.000246859	1.51768	AT2G42280	0.0307751
BnaC02g40860D	0.000249013	2.42112	AT5G25150	0.0309993
BnaCnng58960D	0.000252679	2.15969	AT3G27830	0.0314107
BnaA08g03940D	0.000254071	-4.43785	AT5G38820	0.0315388
BnaC02g39070D	0.000255639	3.17251	AT5G49430	0.0316637
BnaC02g12680D	0.000255803	1.6607	AT5G56000	0.0316637
BnaA08g08110D	0.000256972	4.01318	AT4G16790	0.031757
BnaC02g41110D	0.000257286	2.61221	AT5G24620	0.031757
BnaA09g48280D	0.000266112	4.03841	AT1G10150	0.0327999
BnaA02g15150D	0.000267844	0.399086	AT1G70770	0.0329667
BnaC02g24960D	0.000270011	1.67804	AT1G78310	0.0331706
BnaA03g08070D	0.000270262	1.7411	AT5G20290	0.0331706
BnaA08g10430D	0.000270718	5.68003	AT4G22690	0.0331799
BnaA04g15910D	0.000271717	-2.63933	AT1G08310	0.0332239
BnaA07g37530D	0.00027184	-1.42955	AT2G28315	0.0332239
BnaA10g16310D	0.000273218	2.48535	AT5G18660	0.0333247
BnaC02g23160D	0.000273429	2.25008	AT1G80360	0.0333247
BnaA08g04270D	0.000273905	3.46132	AT4G36070	0.0333361
BnaC02g37270D	0.000274522	3.4151	AT5G13930	0.0333646
BnaC02g36680D	0.000276164	2.1461	AT3G27160	0.0335174
BnaA07g15570D	0.000279093	3.1142	AT5G41940	0.0338258
BnaC05g11110D	0.000279535	1.79791	AT1G80130	0.0338322
BnaC08g48850D	0.000280698	5.52895	AT3G59360	0.0339259
BnaC02g26910D	0.000281287	0.786247	AT2G29940	0.03395
BnaA02g15730D	0.000284279	1.29031	AT1G72040	0.0342636
BnaC08g33950D	0.000285789	-3.73383	AT2G24520	0.0343882
BnaC02g35860D	0.000286424	2.78648	AT3G26000	0.0343882
BnaAnng28450D	0.000286496	-2.34297	AT2G34180	0.0343882
BnaC02g27420D	0.000290228	1.87282	AT4G00300	0.0347625
BnaCnng40930D	0.000290528	2.34452	AT4G10360	0.0347625
BnaC02g25920D	0.000290811	1.49019	AT1G79670	0.0347625
BnaA04g29090D	0.00029153	1.84556	AT2G35040	0.0348007
BnaC05g42100D	0.000292552	1.62869	AT2G46730	0.034875
BnaA08g08980D	0.000296032	9.24864	AT4G19006	0.0352281
BnaA05g25410D	0.000296323	-8.31319	AT3G14050	0.0352281
BnaC09g05240D	0.000296881	-8.78656	AT5G61350	0.0352463
BnaA07g12050D	0.000298157	2.00464	AT5G67180	0.0353496
BnaC02g11140D	0.000299203	2.37466	AT5G57880	0.0354254
BnaA08g12600D	0.000303392	-3.41306	AT4G31290	0.0358727
BnaC02g12750D	0.000310882	1.97393	AT5G56010	0.0367085
BnaCnng08500D	0.000312877	2.59816	AT4G11740	0.0368392
BnaC03g77230D	0.000313144	3.03979	AT4G34100	0.0368392
BnaA09g05670D	0.000313461	-4.68922	AT5G61340	0.0368392
BnaC02g28670D	0.00031391	1.88675	AT5G42700	0.0368392
BnaC02g31960D	0.000314102	2.46056	AT5G51180	0.0368392
BnaC03g66980D	0.000315347	0.96062	AT1G15757	0.0369354
BnaA02g14000D	0.000317393	-0.467462	AT1G68790	0.0370875
BnaA06g16600D	0.000317496	-4.17066	AT3G48360	0.0370875
BnaA02g13050D	0.000318067	0.944041	AT1G67310	0.0371044
BnaC06g19940D	0.000323048	-2.65492	AT1G79270	0.0376351
BnaC03g76830D	0.000324833	-3.29096	AT1G36280	0.0377925
BnaCnng65660D	0.000328045	2.18054	AT1G60010	0.0381153
BnaC02g15890D	0.000329171	1.12542	AT2G20208	0.0381953
BnaC02g32570D	0.000330581	4.40122	AT5G46630	0.0382703
BnaA08g12700D	0.000330696	9.9288	AT4G31080	0.0382703
BnaC03g66450D	0.000332655	8.56804	AT4G33650	0.0384459
BnaC05g51020D	0.00033511	1.35618	AT1G07830	0.0386783
BnaA02g14460D	0.0003379	0.21915	AT1G69640	0.0389488
BnaA02g20120D	0.000338884	3.09467	AT1G64790	0.0390106
BnaA08g13580D	0.000340275	2.27829	/	0.0391191
BnaAnng27550D	0.0003432	1.44363	AT1G05210	0.0393395
BnaC02g38900D	0.000343239	3.05499	AT5G49020	0.0393395
BnaC03g60080D	0.000343547	-3.59652	AT4G38620	0.0393395
BnaA02g15130D	0.000344571	1.7462	AT1G70740	0.039405
BnaC02g48410D	0.00034555	2.23631	AT5G26667	0.0394652
BnaC02g06860D	0.000349481	2.23067	AT5G58412	0.0398619
BnaA06g06100D	0.000353133	-0.880026	AT3G16895	0.0402258
BnaA03g31390D	0.000353906	1.24608	AT4G30660	0.0402612
BnaC02g14930D	0.00035717	1.15634	AT5G52840	0.0405474
BnaC02g10930D	0.000357352	3.49506	AT5G58130	0.0405474
BnaA08g07290D	0.000358982	-4.95665	AT5G33290	0.0405684
BnaA08g07370D	0.000359091	-9.58138	AT5G32470	0.0405684
BnaA08g10150D	0.000359273	8.99587	AT4G22130	0.0405684
BnaA09g04190D	0.00035977	-6.86772	AT5G26742	0.0405684
BnaC06g23190D	0.000359865	0.36886	AT1G74210	0.0405684
BnaC02g46880D	0.000360333	2.08364	AT4G34880	0.0405686
BnaC02g23070D	0.00036235	5.6117	AT1G80480	0.0407169
BnaC02g36280D	0.000362584	1.43495	AT3G26730	0.0407169
BnaC02g41040D	0.000364747	4.93084	AT5G24810	0.0408847
BnaC02g23300D	0.000365017	2.14296	AT1G80150	0.0408847
BnaC02g39810D	0.000365501	3.19377	AT5G27690	0.0408863
BnaA05g20120D	0.000367027	3.87953	AT3G20790	0.0410045
BnaC04g28190D	0.000367758	3.67712	AT3G52470	0.0410335
BnaA10g04620D	0.000368464	6.65977	AT1G07170	0.0410372
BnaC02g23310D	0.000368733	3.29017	AT1G80140	0.0410372
BnaCnng11060D	0.000371218	-3.01938	AT1G30900	0.041261
BnaC02g37730D	0.000375317	1.67424	AT3G29160	0.0416635
BnaC06g19890D	0.000376402	4.37663	AT1G79380	0.0417308
BnaC02g34070D	0.000377191	1.58325	AT2G01630	0.0417652
BnaA02g15720D	0.000377762	1.8221	AT1G72020	0.0417753
BnaC06g01690D	0.000378332	-20.7486	/	0.0417853
BnaA08g07730D	0.000379249	3.32804	AT1G31710	0.0418335
BnaA02g12330D	0.000381067	-0.540988	AT1G65970	0.0419809
BnaC05g27230D	0.000382271	3.76896	AT1G38131	0.0420604
BnaA02g15740D	0.000384415	2.21012	AT1G72050	0.0422162
BnaA02g15930D	0.000385079	1.71979	AT1G72300	0.0422162
BnaA02g12050D	0.00038539	0.670264	AT1G65290	0.0422162
BnaC02g15620D	0.000385624	1.77673	AT5G51590	0.0422162
BnaC05g38350D	0.00038659	-3.90286	AT3G15270	0.0422688
BnaC02g39300D	0.000387298	2.17665	AT5G28840	0.0422932
BnaC07g42790D	0.000388093	2.75107	AT4G30640	0.0423269
BnaC06g24330D	0.000389278	2.31784	AT1G72460	0.042403
BnaA08g25430D	0.00039114	-1.67748	AT1G11170	0.0425527
BnaC02g34430D	0.000392627	2.55087	AT2G02370	0.0426313
BnaC02g14660D	0.00039284	1.50687	AT5G53060	0.0426313
BnaCnng22220D	0.000394137	2.04593	AT2G01480	0.0427188
BnaC04g42810D	0.000396885	2.55494	AT2G31470	0.0429555
BnaCnng70140D	0.000397307	2.15958	AT5G49210	0.0429555
BnaC02g31740D	0.000403157	1.58316	AT5G45590	0.0434275
BnaC02g41190D	0.000403362	2.19187	AT5G24570	0.0434275
BnaC03g62120D	0.000403997	3.64012	AT3G14130	0.0434275
BnaA09g05220D	0.000404054	3.98164	AT5G23580	0.0434275
BnaCnng21330D	0.000404165	1.35593	AT1G53330	0.0434275
BnaCnng08470D	0.000405518	2.16125	AT2G18510	0.0434723
BnaC02g33920D	0.000405579	1.97836	AT5G36290	0.0434723
BnaA02g18630D	0.000406379	2.02747	AT1G77770	0.0435045
BnaA02g24790D	0.000409851	2.01921	AT5G46920	0.0438084
BnaCnng60400D	0.000410223	-4.1746	AT5G61560	0.0438084
BnaC02g08840D	0.000414708	1.5569	AT5G19570	0.0442246
BnaC08g13260D	0.000415136	1.61868	AT4G29000	0.0442246
BnaC02g48770D	0.000416104	3.62408	AT5G23630	0.0442737
BnaA10g07140D	0.000420826	1.91701	AT5G53900	0.0447215
BnaC02g16730D	0.000421756	-3.38696	AT5G67450	0.0447657
BnaC01g35510D	0.000423606	-7.89908	AT3G16130	0.0448117
BnaCnng16230D	0.000423817	1.67415	AT3G27390	0.0448117
BnaC02g10240D	0.000424207	1.62271	AT5G59180	0.0448117
BnaA02g29870D	0.000424246	-7.17712	/	0.0448117
BnaA09g39610D	0.00042609	5.69422	AT3G62030	0.0449519
BnaC02g16110D	0.000427079	1.53906	AT5G50410	0.0449662
BnaC02g07020D	0.000427256	0.583605	AT5G17160	0.0449662
BnaC07g07870D	0.000429039	-3.45447	AT3G23630	0.0450676
BnaC02g41760D	0.000429601	2.40339	AT5G23150	0.0450676
BnaA09g52720D	0.000429772	5.19026	AT2G15290	0.0450676
BnaA04g10740D	0.00043124	1.71551	AT5G40980	0.0451203
BnaA03g34250D	0.00043131	6.65891	AT3G16640	0.0451203
BnaC03g61880D	0.000432015	11.1378	AT4G36690	0.0451399
BnaC03g66790D	0.000433246	-4.03393	AT4G33040	0.0452143
BnaC08g13950D	0.000433953	5.19958	AT1G10040	0.0452339
BnaA08g13730D	0.000436053	-2.9137	AT4G28390	0.0453985
BnaC07g15300D	0.000439674	3.96773	AT1G20580	0.0457208
BnaC09g28170D	0.000441257	-4.67109	AT5G51950	0.0457765
BnaC01g44110D	0.000441405	0.521733	AT3G16970	0.0457765
BnaC03g73690D	0.000441785	-2.14087	AT3G13030	0.0457765
BnaC08g32110D	0.000443352	-1.43201	AT3G62300	0.0458629
BnaC08g36110D	0.000444255	3.58372	AT2G20920	0.0458629
BnaA06g33260D	0.000444838	2.80026	AT3G25900	0.0458629
BnaC02g37970D	0.000445145	2.03849	AT3G29400	0.0458629
BnaC02g15560D	0.00044525	1.32734	AT5G51690	0.0458629
BnaA02g33110D	0.000450185	6.32749	AT5G61980	0.0463165
BnaC02g33040D	0.000451339	2.97487	AT5G47010	0.0463264
BnaC08g24870D	0.000451345	5.85673	AT3G53890	0.0463264
BnaC02g39500D	0.000454362	2.92867	AT3G04920	0.0465812
BnaA08g12160D	0.000457342	-4.44049	AT4G32540	0.0468257
BnaC03g78100D	0.000458039	3.54973	AT1G53040	0.0468257
BnaC02g47680D	0.000458359	2.11172	AT2G02100	0.0468257
BnaA08g15430D	0.000462386	1.06321	AT5G05690	0.0471492
BnaA04g21180D	0.000463104	-6.23319	AT2G36960	0.0471492
BnaC09g23540D	0.000463149	-2.64143	AT4G12030	0.0471492
BnaA08g08580D	0.000465951	-3.59785	AT4G18160	0.0473792
BnaA02g15830D	0.000467911	2.68362	AT1G72160	0.047523
BnaC02g36830D	0.000469222	1.73838	AT3G27420	0.0475736
BnaC08g46560D	0.000469502	4.52187	/	0.0475736
BnaA02g17780D	0.000470358	1.1956	AT1G76860	0.047605
BnaA06g35570D	0.000471577	2.20775	AT5G47140	0.047673
BnaA03g08500D	0.00047399	2.27036	AT5G22360	0.0478354
BnaA08g09640D	0.000474281	8.16739	AT4G21620	0.0478354
BnaC02g28190D	0.000475764	1.93667	AT4G12420	0.0479295
BnaA10g04540D	0.000476508	6.6195	AT1G07090	0.047949
BnaC07g15290D	0.000477152	-1.24283	AT1G76340	0.0479584
BnaC01g00390D	0.000479834	4.19743	AT4G39500	0.0481285
BnaA09g52750D	0.000479949	1.50565	AT2G14910	0.0481285
BnaCnng21480D	0.000485362	9.51988	/	0.0485255
BnaCnng68040D	0.000485913	-2.98859	AT3G14420	0.0485255
BnaC06g38860D	0.000485913	-2.98859	AT3G14420	0.0485255
BnaA03g09820D	0.000486135	5.13794	AT5G58300	0.0485255
BnaA03g03980D	0.000487627	-2.92781	AT5G12420	0.0486187
BnaC08g13270D	0.000494521	1.58292	AT4G29010	0.0491477
BnaA09g05390D	0.000494582	5.46804	AT5G23290	0.0491477
BnaAnng15350D	0.000494624	5.86203	AT4G34910	0.0491477
BnaA08g07860D	0.000497495	-8.87019	AT1G31480	0.0493767
BnaC02g16340D	0.000498782	1.34869	AT1G65040	0.0494481
BnaC02g08760D	0.000500565	0.870972	AT5G19510	0.0495684
BnaA02g18530D	0.000501551	1.87243	AT1G77140	0.0496098

## Sheet: ST5
Table S5. Summary of TWAS-significant genes for oleic acid at 40 DAF
Gene	Lmm_p	Lr_beta	Tair	FDR
BnaA08g10900D	2.52379e-38	6.70587	/	2.02098e-33
BnaA08g11870D	1.48473e-28	-5.5322	AT4G33210	5.94464e-24
BnaA08g11190D	1.87493e-26	11.5674	AT4G34430	5.00463e-22
BnaC03g77050D	5.16561e-26	6.65673	AT2G27960	1.03412e-21
BnaC03g77060D	1.16215e-23	-6.2391	AT3G42050	1.86124e-19
BnaA08g10170D	2.76202e-22	7.26361	AT4G22220	3.68624e-18
BnaA08g10050D	1.19979e-21	5.276	AT4G21865	1.37251e-17
BnaA08g11590D	7.01388e-20	11.5482	AT4G34120	7.02063e-16
BnaA08g12100D	1.01716e-18	9.82918	AT4G32680	9.0501e-15
BnaA08g11470D	1.03639e-17	-8.55665	AT4G33680	8.29909e-14
BnaAnng08820D	1.40055e-17	-3.36262	AT4G13950	1.01957e-13
BnaA08g12340D	2.74577e-17	-3.89056	AT4G31830	1.83227e-13
BnaA08g10220D	7.29648e-17	15.6953	AT4G22360	4.49446e-13
BnaA08g12360D	1.42833e-16	10.0942	AT4G31770	8.16976e-13
BnaA08g10160D	1.62774e-16	14.1086	AT4G22140	8.68963e-13
BnaA08g11640D	1.79583e-16	-11.5223	AT4G34050	8.98781e-13
BnaA08g30680D	6.07628e-16	-6.75247	AT4G32272	2.86218e-12
BnaC03g66730D	6.83897e-16	14.5176	AT4G33210	3.04247e-12
BnaA08g08530D	1.83254e-15	9.35546	AT4G18040	7.72337e-12
BnaA08g11580D	2.60756e-15	-10.4921	AT4G33520	1.04403e-11
BnaA08g11050D	9.45054e-15	12.477	AT4G34660	3.60367e-11
BnaA08g10230D	3.7397e-14	12.5104	AT4G12590	1.3612e-10
BnaA08g30310D	5.25067e-14	5.49346	AT4G16610	1.82808e-10
BnaA08g11040D	5.62014e-14	12.3337	AT4G34670	1.87518e-10
BnaA08g09790D	1.25894e-13	7.44766	AT4G21160	4.03248e-10
BnaA08g12110D	1.51932e-13	9.88451	AT4G32680	4.67932e-10
BnaA08g10000D	2.26717e-13	-6.1039	AT4G21710	6.72401e-10
BnaCnng77270D	3.77277e-13	-3.99771	/	1.07897e-09
BnaC03g60490D	5.36726e-13	6.76894	AT4G39260	1.48205e-09
BnaA08g11600D	7.83257e-13	13.1013	AT5G11760	2.0907e-09
BnaA08g12030D	1.24011e-12	-7.58387	AT4G32760	3.20336e-09
BnaC08g46770D	1.31403e-12	14.8786	AT4G13950	3.28825e-09
BnaC03g29980D	1.39153e-12	4.13242	AT3G17900	3.37666e-09
BnaA08g11770D	1.81724e-12	-16.1917	AT4G33430	4.27997e-09
BnaA08g11910D	2.73131e-12	6.19011	AT4G33090	6.249e-09
BnaA08g30590D	3.16108e-12	8.41373	AT4G02890	7.03139e-09
BnaA08g09980D	3.6501e-12	9.3389	AT4G20940	7.8997e-09
BnaA08g30180D	4.30088e-12	4.89215	AT4G14570	9.0632e-09
BnaA08g09150D	5.42623e-12	11.0322	AT4G19210	1.11415e-08
BnaA08g04960D	7.61335e-12	-3.0386	AT1G77230	1.52413e-08
BnaA08g08170D	1.01079e-11	4.43027	AT4G16980	1.97416e-08
BnaA08g05840D	1.0894e-11	4.79432	AT4G15765	2.07705e-08
BnaA08g11930D	1.2839e-11	10.1669	AT4G33050	2.39095e-08
BnaA08g08860D	1.40181e-11	7.31438	AT4G18570	2.55119e-08
BnaC01g01300D	2.24248e-11	4.57709	/	3.99046e-08
BnaA08g10150D	2.4569e-11	9.65759	AT4G22130	4.27697e-08
BnaA08g11320D	2.6954e-11	16.1447	AT4G34200	4.59233e-08
BnaC03g66460D	2.99474e-11	14.8446	AT4G33630	4.99604e-08
BnaAnng19130D	4.96827e-11	7.3075	AT4G17330	8.11928e-08
BnaC03g66650D	5.11016e-11	-11.5223	AT1G29880	8.18412e-08
BnaA08g07020D	6.09817e-11	8.99998	AT1G31970	9.57496e-08
BnaC06g01690D	6.65448e-11	-14.6333	/	1.02475e-07
BnaC07g02940D	7.30889e-11	-5.86114	/	1.10429e-07
BnaA08g07200D	1.07858e-10	-9.4397	AT5G35170	1.59943e-07
BnaC03g66780D	1.14633e-10	8.34355	AT4G33050	1.66899e-07
BnaAnng27210D	1.26904e-10	11.7507	AT4G19900	1.81467e-07
BnaCnng78760D	1.49691e-10	-4.98894	AT3G50710	2.10295e-07
BnaA08g09800D	1.61108e-10	4.42413	/	2.22431e-07
BnaA08g11340D	1.71397e-10	8.34726	AT3G42050	2.32626e-07
BnaA08g12140D	1.75799e-10	-4.64778	AT4G32570	2.34624e-07
BnaA08g07210D	1.8092e-10	13.0068	AT5G35180	2.37501e-07
BnaA08g06980D	2.18513e-10	-5.5333	AT1G76065	2.82223e-07
BnaA08g08510D	2.50025e-10	11.1506	AT4G17950	3.17797e-07
BnaA08g08350D	2.59999e-10	9.53179	AT4G17550	3.25312e-07
BnaA08g30210D	2.87409e-10	11.7572	AT4G17150	3.54075e-07
BnaA08g08550D	3.54498e-10	10.4776	AT4G18100	4.30108e-07
BnaA08g02730D	3.62625e-10	13.5816	AT1G49380	4.33402e-07
BnaA08g10130D	4.84111e-10	-6.04659	AT1G60260	5.70091e-07
BnaA08g12330D	7.79768e-10	5.0499	AT4G31840	9.04949e-07
BnaA08g08570D	8.84047e-10	-6.00706	/	1.01131e-06
BnaC09g01300D	9.6486e-10	4.06255	AT3G27010	1.08821e-06
BnaA08g10860D	1.12114e-09	10.308	AT4G35100	1.24691e-06
BnaA08g07050D	1.37294e-09	7.14242	AT1G31880	1.50605e-06
BnaA08g10700D	1.83604e-09	16.1225	AT4G35260	1.98682e-06
BnaC03g64530D	1.8929e-09	4.69256	AT4G21710	2.02104e-06
BnaA08g29910D	2.23477e-09	-5.23442	AT2G06520	2.35466e-06
BnaA08g09630D	2.27893e-09	16.9149	AT4G21660	2.37e-06
BnaA08g30290D	2.35241e-09	7.01768	AT4G17300	2.41505e-06
BnaAnng31110D	2.38817e-09	10.6135	AT4G18710	2.42072e-06
BnaA08g11170D	3.01611e-09	12.9899	AT4G34450	3.01901e-06
BnaA08g08200D	3.22787e-09	6.28543	AT4G17070	3.19109e-06
BnaCnng62920D	3.49315e-09	14.7075	AT4G39680	3.37235e-06
BnaA08g09060D	3.49545e-09	6.65302	AT4G19120	3.37235e-06
BnaA08g11740D	4.20759e-09	-7.78958	AT4G33920	4.01108e-06
BnaC03g76260D	4.81125e-09	5.91534	AT4G39730	4.53259e-06
BnaA08g10410D	5.46872e-09	13.7985	AT4G22670	5.01232e-06
BnaC03g77130D	5.49939e-09	1.69503	AT4G33985	5.01232e-06
BnaC03g76980D	5.50825e-09	-4.96447	AT4G19870	5.01232e-06
BnaC03g66990D	5.65595e-09	2.13031	AT2G12480	5.08889e-06
BnaC03g61240D	5.76425e-09	12.896	AT4G37820	5.12871e-06
BnaA09g05650D	6.18698e-09	4.92665	AT5G61240	5.44434e-06
BnaA08g03630D	6.89387e-09	-4.44334	AT1G47860	6.00044e-06
BnaA08g11650D	7.03578e-09	-6.18656	AT4G34030	6.05811e-06
BnaA08g09100D	7.14294e-09	8.23059	AT4G19160	6.08495e-06
BnaA08g09970D	1.08331e-08	11.1604	AT4G20960	9.1149e-06
BnaAnng33750D	1.09274e-08	6.04776	AT2G30290	9.1149e-06
BnaC03g65020D	1.23917e-08	5.96172	AT4G22560	1.02298e-05
BnaC03g64990D	1.28054e-08	5.78938	AT2G04305	1.04635e-05
BnaC03g64540D	1.4882e-08	5.63634	AT4G21710	1.20374e-05
BnaAnng41100D	1.52251e-08	-1.92428	AT1G36160	1.21651e-05
BnaA10g13430D	1.53437e-08	8.32802	AT4G34588	1.21651e-05
BnaA08g02780D	1.57901e-08	8.51283	AT1G49320	1.23963e-05
BnaA08g10430D	1.6879e-08	5.60829	AT4G22690	1.31225e-05
BnaC02g42050D	1.95462e-08	6.03585	AT5G61170	1.49603e-05
BnaC03g76330D	1.96166e-08	15.169	AT4G39690	1.49603e-05
BnaA08g01130D	2.55618e-08	2.78534	AT1G53380	1.93105e-05
BnaCnng54330D	2.5981e-08	2.15887	AT5G47930	1.94437e-05
BnaA08g12250D	2.64543e-08	7.303	AT4G32300	1.96146e-05
BnaA08g12450D	3.05894e-08	7.10818	AT4G31480	2.24726e-05
BnaA08g11840D	3.11605e-08	-8.95411	AT4G33300	2.2684e-05
BnaA08g12090D	3.17119e-08	-9.60835	AT3G26560	2.28774e-05
BnaA08g10510D	3.23255e-08	12.9863	AT4G22920	2.31118e-05
BnaC03g66660D	3.26334e-08	-9.76823	AT1G29880	2.31255e-05
BnaA08g30710D	3.39804e-08	7.95142	AT4G31700	2.38689e-05
BnaCnng76650D	3.59153e-08	2.4299	/	2.50086e-05
BnaA08g30700D	4.09321e-08	4.05842	AT4G31610	2.82562e-05
BnaC03g66190D	4.34055e-08	10.3395	AT4G34350	2.97075e-05
BnaA08g08330D	4.54304e-08	9.40128	AT4G17520	3.08299e-05
BnaC03g60140D	4.66893e-08	9.68063	AT4G38710	3.1418e-05
BnaC03g77030D	4.91351e-08	10.9987	AT4G34200	3.25911e-05
BnaC02g41820D	4.92467e-08	4.25285	AT5G60850	3.25911e-05
BnaA08g11150D	5.00655e-08	11.4714	AT4G34490	3.28614e-05
BnaA08g08750D	5.07069e-08	6.50723	/	3.30118e-05
BnaA08g08370D	5.15897e-08	5.16809	AT4G17570	3.33157e-05
BnaA08g08500D	5.30319e-08	8.63392	AT4G17940	3.39731e-05
BnaUnng05100D	5.42573e-08	4.16224	/	3.44822e-05
BnaC03g64580D	5.54703e-08	9.83901	AT4G21800	3.49756e-05
BnaA08g08760D	6.30937e-08	-6.40443	AT4G18425	3.94715e-05
BnaC03g63310D	6.45002e-08	8.78632	AT4G19540	4.00386e-05
BnaA02g30860D	6.92994e-08	-3.65565	/	4.26868e-05
BnaC03g65810D	7.03825e-08	14.6872	AT4G34710	4.3023e-05
BnaA08g11480D	7.64399e-08	8.25041	AT4G33670	4.63718e-05
BnaA08g09730D	9.58415e-08	9.88743	AT4G21450	5.77045e-05
BnaA08g30400D	1.04826e-07	5.85408	AT4G20150	6.26428e-05
BnaAnng21820D	1.07904e-07	6.4986	AT4G28360	6.40048e-05
BnaC08g07860D	1.11824e-07	5.75729	AT1G32050	6.58419e-05
BnaA09g05160D	1.25819e-07	3.75393	AT4G39160	7.35416e-05
BnaA08g30000D	1.44586e-07	-4.93714	AT5G35790	8.38985e-05
BnaC02g33660D	1.45785e-07	3.65091	AT2G01140	8.39859e-05
BnaA08g30460D	1.48944e-07	8.95894	AT4G20270	8.51929e-05
BnaAnng26540D	1.57286e-07	4.91595	/	8.93263e-05
BnaA08g30220D	1.70828e-07	8.90112	AT4G17170	9.6334e-05
BnaC03g63270D	1.76074e-07	5.54548	AT1G43270	9.8598e-05
BnaC03g65070D	1.86603e-07	5.28955	/	0.000102714
BnaC02g33900D	1.86984e-07	3.38882	AT2G01320	0.000102714
BnaA08g08270D	1.87273e-07	9.48249	AT4G17390	0.000102714
BnaCnng22210D	2.15308e-07	2.07158	AT2G01470	0.000117287
BnaA05g12830D	2.34332e-07	3.36487	AT4G19645	0.000126788
BnaC03g60120D	2.57258e-07	9.13203	AT4G38660	0.000138258
BnaC04g13940D	2.85396e-07	-16.5584	/	0.000152358
BnaA08g12680D	2.91954e-07	9.90659	AT4G31130	0.000154827
BnaC03g64570D	2.94471e-07	7.93652	AT4G04890	0.000155134
BnaA08g11130D	3.06682e-07	15.978	AT4G34520	0.000160511
BnaC03g77140D	3.11203e-07	1.22915	AT1G43140	0.000161819
BnaA09g30170D	3.14153e-07	9.89732	AT1G23010	0.000162299
BnaA08g03940D	3.20809e-07	-4.86951	AT5G38820	0.000164676
BnaA08g08360D	3.30316e-07	7.66895	AT4G17560	0.000168476
BnaA08g29450D	3.34568e-07	6.81403	AT4G14660	0.000169565
BnaA06g04740D	3.409e-07	3.67347	AT1G08300	0.000171687
BnaA08g05340D	3.57745e-07	-8.61162	AT4G14500	0.000178396
BnaA08g04310D	3.58676e-07	3.75215	AT5G66970	0.000178396
BnaCnng19500D	3.66376e-07	-5.67292	/	0.000181101
BnaA08g08120D	3.72446e-07	11.903	AT4G16800	0.000182971
BnaA08g12120D	4.02734e-07	-8.57216	AT4G32610	0.000196645
BnaA08g09340D	4.14236e-07	8.58651	AT4G19830	0.000201035
BnaC07g48920D	4.31289e-07	-2.81313	AT5G35912	0.00020805
BnaA08g12590D	4.4659e-07	-3.36508	AT3G48110	0.000213021
BnaA08g08210D	4.46913e-07	11.503	AT4G17080	0.000213021
BnaA08g04190D	4.5162e-07	-3.67251	AT1G45474	0.00021399
BnaA08g10980D	4.87311e-07	5.64289	AT3G18000	0.000229544
BnaA08g07860D	5.57169e-07	-10.9058	AT1G31480	0.000260915
BnaA02g12020D	5.64445e-07	4.33626	AT1G65260	0.000262785
BnaA08g08380D	5.82427e-07	6.90894	AT4G17650	0.00026959
BnaA08g12480D	5.99707e-07	-6.90667	AT4G31430	0.000274227
BnaC07g48930D	6.02092e-07	-3.81547	AT3G26790	0.000274227
BnaC02g33980D	6.02718e-07	2.66829	AT2G01540	0.000274227
BnaA03g12740D	6.12104e-07	8.05813	AT5G52190	0.000276923
BnaC07g30180D	6.31013e-07	6.11724	AT5G24280	0.000282392
BnaA08g30670D	6.32973e-07	6.2619	AT4G32270	0.000282392
BnaA08g30480D	6.34771e-07	10.4355	AT4G20360	0.000282392
BnaC08g13280D	6.56443e-07	4.65152	AT4G29020	0.00029042
BnaAnng15350D	6.72428e-07	6.72376	AT4G34910	0.000295857
BnaC05g04620D	6.81287e-07	9.87304	AT1G06710	0.000298117
BnaA08g09030D	7.31562e-07	14.2388	AT4G19112	0.000317182
BnaA08g11370D	7.32779e-07	-3.6155	AT4G34138	0.000317182
BnaCnng41700D	7.46663e-07	3.70303	AT5G47820	0.000321455
BnaC09g01260D	7.59491e-07	4.35534	AT3G26990	0.000325229
BnaA02g15600D	7.77645e-07	3.74888	AT5G41690	0.000331231
BnaC04g13680D	7.96304e-07	7.23983	AT3G59820	0.000337384
BnaA08g06960D	8.12435e-07	-12.5591	AT1G32200	0.000342407
BnaA08g08880D	8.36781e-07	6.61301	AT4G18593	0.000350822
BnaC05g51210D	8.76176e-07	7.47553	AT1G50480	0.000365425
BnaA08g06490D	8.96321e-07	-3.96713	AT1G34190	0.00037189
BnaA08g04600D	9.17947e-07	-8.7743	AT1G42960	0.000378899
BnaCnng22200D	9.23801e-07	2.4546	AT2G01460	0.00037936
BnaA08g09210D	9.29994e-07	3.96517	AT4G19500	0.000379955
BnaA02g15650D	9.70116e-07	3.80929	AT1G71920	0.000394335
BnaA09g37450D	9.8887e-07	5.40225	AT3G58500	0.000399928
BnaC03g38380D	1.00679e-06	8.70719	AT3G14225	0.000405129
BnaA08g06750D	1.05082e-06	4.39112	/	0.000420734
BnaA08g12020D	1.09205e-06	11.6087	AT4G32790	0.000435065
BnaC02g47660D	1.1138e-06	2.56652	AT2G01450	0.000441532
BnaAnng31880D	1.14828e-06	11.2414	AT4G18700	0.00045296
BnaA08g09510D	1.16041e-06	4.62443	AT4G20830	0.000455502
BnaC08g29630D	1.16758e-06	5.38295	AT3G59140	0.000456078
BnaC02g33150D	1.19576e-06	3.57426	AT3G01910	0.000464819
BnaA08g03420D	1.27476e-06	7.88386	/	0.000493134
BnaCnng52550D	1.32135e-06	4.49874	/	0.000508701
BnaA10g24140D	1.34023e-06	-7.40083	AT4G34710	0.000513499
BnaAnng07020D	1.42671e-06	14.9825	AT5G61780	0.000544033
BnaAnng22940D	1.44991e-06	2.87114	AT3G25660	0.000550256
BnaA08g12500D	1.46511e-06	-4.39284	AT4G31400	0.000553405
BnaC02g33510D	1.53453e-06	4.01155	AT4G15950	0.000576903
BnaCnng28630D	1.56148e-06	-2.38086	AT3G22640	0.000584291
BnaA08g08660D	1.62215e-06	10.9025	AT4G18240	0.000604172
BnaCnng74960D	1.73702e-06	-2.36153	AT5G61820	0.000643959
BnaA08g10100D	1.76968e-06	8.67934	AT5G11250	0.000653043
BnaC02g44060D	1.79786e-06	11.477	AT4G39460	0.000660399
BnaA09g05200D	1.82639e-06	5.97687	AT5G23630	0.000667816
BnaC09g06050D	1.86681e-06	3.20066	AT5G63680	0.000679495
BnaC05g30220D	1.97527e-06	7.93466	AT3G22310	0.000715718
BnaA04g05580D	2.02641e-06	4.4458	AT3G52240	0.000730942
BnaC02g33310D	2.04039e-06	5.53341	AT5G47520	0.000732681
BnaC03g66700D	2.12355e-06	5.08754	AT4G33260	0.000759139
BnaA08g05690D	2.16227e-06	9.5441	AT4G15470	0.000769546
BnaA08g10920D	2.31779e-06	13.7362	AT4G35040	0.000821248
BnaA08g10490D	2.35748e-06	4.94369	AT4G22860	0.000829424
BnaA08g07290D	2.36159e-06	-3.71142	AT5G33290	0.000829424
BnaC06g13790D	2.38724e-06	4.15565	/	0.00083322
BnaC02g42020D	2.3932e-06	3.96453	AT5G61140	0.00083322
BnaC02g33460D	2.41717e-06	3.41684	AT5G47690	0.000837921
BnaC03g49130D	2.50612e-06	2.84789	/	0.000865011
BnaA08g01100D	2.59291e-06	3.44488	AT1G53460	0.000891125
BnaA08g04210D	2.62652e-06	-7.72964	AT1G45230	0.00089882
BnaC03g64670D	2.68083e-06	4.71145	AT4G21870	0.0009135
BnaC06g13360D	2.75526e-06	-6.60153	/	0.000934885
BnaC02g34070D	2.83361e-06	1.92205	AT2G01630	0.000954195
BnaA08g08650D	2.836e-06	4.49542	AT4G18210	0.000954195
BnaA06g24720D	2.85713e-06	-2.50335	/	0.000957283
BnaAnng41140D	2.87871e-06	8.47697	AT5G61960	0.000960492
BnaA08g09710D	2.91583e-06	5.26162	AT4G21534	0.000965994
BnaA02g14660D	2.91932e-06	5.19246	AT1G69250	0.000965994
BnaC08g47830D	2.95935e-06	3.60041	/	0.000975208
BnaA02g15050D	3.01977e-06	4.5936	AT1G70620	0.000989805
BnaC02g32060D	3.02836e-06	3.92195	AT5G46020	0.000989805
BnaA09g06140D	3.05788e-06	-3.66792	AT5G62580	0.00099539
BnaA08g11360D	3.28846e-06	-6.37672	AT4G34150	0.00106611
BnaC03g66490D	3.31457e-06	4.14034	AT4G33600	0.00107025
BnaA02g15830D	3.37678e-06	3.69997	AT1G72160	0.00108595
BnaC03g64900D	3.44408e-06	12.8523	AT4G12590	0.00110316
BnaA02g15950D	3.51033e-06	4.69772	AT1G72340	0.00111991
BnaA06g16480D	3.57129e-06	4.15029	/	0.00113483
BnaA08g06540D	3.61375e-06	-6.37185	AT1G33990	0.00114379
BnaC02g33280D	3.65356e-06	3.36065	AT5G47200	0.00115183
BnaC03g56240D	3.67499e-06	10.5645	AT3G46970	0.00115405
BnaA08g10040D	3.79254e-06	-3.97315	AT4G21850	0.00118489
BnaA06g03380D	3.81202e-06	-2.4196	AT5G56630	0.00118489
BnaC09g06060D	3.81759e-06	3.40331	AT5G63680	0.00118489
BnaA08g02800D	3.90936e-06	-8.16356	AT1G49300	0.00120869
BnaA07g20970D	3.92699e-06	6.28542	AT1G77470	0.00120947
BnaA08g03660D	4.0331e-06	-5.14322	AT1G47740	0.00123739
BnaC03g76410D	4.05944e-06	15.3303	AT2G21390	0.00124072
BnaC03g59840D	4.12203e-06	9.4906	AT4G14300	0.00125505
BnaC03g64840D	4.17933e-06	9.78953	AT4G22130	0.00126484
BnaA02g16420D	4.18576e-06	4.01005	AT1G73380	0.00126484
BnaA02g21400D	4.25453e-06	2.38896	AT1G50440	0.00128079
BnaC04g00550D	4.32948e-06	6.12011	AT2G46915	0.00129392
BnaC03g59130D	4.33047e-06	16.9558	AT1G30120	0.00129392
BnaC01g27380D	4.3823e-06	-2.99949	AT1G55340	0.00130206
BnaA04g18680D	4.39022e-06	2.77444	AT2G32300	0.00130206
BnaC02g34010D	4.44074e-06	1.83009	AT2G01600	0.00131218
BnaA08g06090D	4.52805e-06	9.93689	AT4G16143	0.00133306
BnaA08g06420D	4.66366e-06	-3.56943	AT1G34355	0.00136795
BnaC08g08360D	4.71287e-06	10.8373	AT4G14110	0.00137734
BnaC03g67840D	4.80941e-06	7.02264	AT4G30930	0.00140045
BnaAnng09380D	4.92363e-06	5.63265	AT3G11940	0.00142607
BnaA08g29920D	4.93303e-06	-3.92217	AT2G06520	0.00142607
BnaCnng70380D	4.95635e-06	3.97492	AT2G02060	0.00142766
BnaA08g12600D	5.2404e-06	-3.66438	AT4G31290	0.0015014
BnaA08g08850D	5.24983e-06	5.55152	AT4G18550	0.0015014
BnaCnng30710D	5.27156e-06	4.10663	AT4G10790	0.00150225
BnaA08g02910D	5.36159e-06	-4.44082	AT1G48960	0.00152248
BnaA02g16850D	5.41626e-06	4.94146	AT1G74250	0.00152683
BnaC08g29370D	5.41741e-06	10.396	AT3G58660	0.00152683
BnaA08g09450D	5.4341e-06	12.8715	AT4G20440	0.00152683
BnaA08g10190D	5.62308e-06	4.86813	AT1G53360	0.0015744
BnaA08g13830D	5.77908e-06	9.3222	AT4G28260	0.0016107
BnaA08g30330D	5.84156e-06	8.96707	AT4G16630	0.0016107
BnaA08g02770D	5.84565e-06	3.81654	AT1G49330	0.0016107
BnaC09g10310D	5.85327e-06	3.38362	AT2G20250	0.0016107
BnaC02g15270D	5.85328e-06	3.12737	AT5G52300	0.0016107
BnaA05g20120D	5.88312e-06	4.95972	AT3G20790	0.00161337
BnaC05g15980D	5.96952e-06	3.94164	AT5G07740	0.0016303
BnaA08g29720D	5.9856e-06	-8.08452	AT1G42540	0.0016303
BnaC09g21750D	6.17181e-06	7.30651	AT4G05410	0.00167532
BnaA08g07730D	6.19284e-06	3.11654	AT1G31710	0.00167535
BnaCnng40030D	6.22223e-06	5.70651	AT4G37020	0.00167763
BnaC05g24100D	6.24918e-06	3.44479	AT1G31880	0.00167925
BnaC03g66430D	6.31287e-06	12.9234	AT4G33680	0.00169069
BnaA07g11090D	6.33844e-06	2.58388	AT1G21090	0.00169188
BnaA02g18540D	6.51423e-06	-4.29861	AT4G08596	0.00173302
BnaC02g32010D	6.55234e-06	2.00514	AT5G45960	0.00173739
BnaC04g22450D	6.57934e-06	4.07869	AT1G10120	0.00173879
BnaC03g62020D	6.7414e-06	3.77008	AT5G11250	0.00177576
BnaC04g31760D	6.79763e-06	7.78963	AT5G39710	0.0017847
BnaA08g10890D	6.92621e-06	8.61513	AT4G35070	0.00181252
BnaC09g02630D	7.07582e-06	6.52	AT5G49230	0.00184564
BnaC09g04160D	7.3813e-06	3.08075	AT5G25090	0.00191907
BnaA08g06560D	7.67275e-06	-10.5748	AT1G33980	0.00198595
BnaCnng71920D	7.68817e-06	4.44069	AT4G34160	0.00198595
BnaC09g16100D	7.71624e-06	3.58258	AT5G11020	0.00198679
BnaC02g39100D	7.82468e-06	1.43637	/	0.00200806
BnaCnng43330D	7.849e-06	9.83237	AT3G63090	0.00200806
BnaC02g33480D	7.94595e-06	4.47497	AT5G47730	0.0020264
BnaC03g64590D	7.98737e-06	9.34668	AT4G21810	0.00202908
BnaA02g17730D	8.00716e-06	5.94933	AT1G76810	0.00202908
BnaA04g04780D	8.08591e-06	7.16782	AT3G53430	0.00204257
BnaC06g19090D	8.35868e-06	7.57285	AT1G80300	0.00210484
BnaC03g61760D	8.39774e-06	10.0606	AT4G36870	0.00210804
BnaA03g28800D	8.45395e-06	5.989	AT3G04820	0.00211552
BnaA03g35750D	8.77407e-06	2.86723	AT3G20370	0.00218879
BnaA09g05840D	8.86244e-06	3.8489	AT5G62000	0.00220288
BnaAnng17780D	8.90941e-06	3.19348	AT5G62620	0.00220288
BnaC05g02730D	8.91308e-06	14.7846	AT1G04690	0.00220288
BnaC01g13560D	9.05871e-06	3.68772	AT4G19670	0.00222663
BnaA08g10030D	9.09475e-06	6.63533	AT4G21810	0.00222663
BnaC06g42920D	9.09987e-06	8.31089	AT3G61560	0.00222663
BnaA01g18420D	9.1204e-06	7.31455	/	0.00222663
BnaA04g04700D	9.18191e-06	6.74429	AT3G53520	0.00223483
BnaC03g67000D	9.32165e-06	8.0554	AT4G32700	0.00226197
BnaA08g22510D	9.52998e-06	10.6782	AT1G18640	0.0023043
BnaCnng54350D	9.55364e-06	2.0671	AT5G47890	0.0023043
BnaA02g36030D	9.66234e-06	4.29126	AT1G76180	0.00231847
BnaC03g65910D	9.67032e-06	14.6138	AT4G34640	0.00231847
BnaAnng39720D	9.83147e-06	2.02031	AT3G07890	0.00235007
BnaCnng41680D	1.01841e-05	4.49201	/	0.0024227
BnaC03g76360D	1.01958e-05	7.10332	AT4G39660	0.0024227
BnaA08g12640D	1.05397e-05	3.91441	AT4G31150	0.00249701
BnaC04g32790D	1.0682e-05	4.41857	AT5G40660	0.00252325
BnaC08g29640D	1.10101e-05	4.78901	AT3G59140	0.0025931
BnaA10g04280D	1.105e-05	7.23232	AT1G06530	0.00259488
BnaC02g39790D	1.11286e-05	4.75029	AT5G27630	0.00260569
BnaA03g46830D	1.12562e-05	4.2043	AT4G24620	0.00262789
BnaC09g02680D	1.13013e-05	3.17361	AT5G49360	0.00263074
BnaC08g03540D	1.14832e-05	2.45467	AT1G48480	0.00266533
BnaA03g28220D	1.15414e-05	-5.31552	AT3G03150	0.00266701
BnaC02g39570D	1.1557e-05	2.40908	AT5G27120	0.00266701
BnaA07g25010D	1.16541e-05	2.90592	AT1G67430	0.00268169
BnaC03g68360D	1.17441e-05	9.01045	AT1G49890	0.00269464
BnaA08g04180D	1.17795e-05	-4.27954	AT1G45545	0.00269506
BnaC02g34380D	1.20703e-05	3.99392	AT2G02170	0.00275371
BnaAnng27600D	1.2456e-05	11.5114	AT4G16510	0.00283363
BnaC02g33290D	1.25554e-05	3.3144	AT5G47210	0.00284815
BnaC08g26240D	1.26968e-05	7.71812	AT3G55430	0.00287208
BnaA03g22870D	1.29247e-05	7.11518	AT2G25790	0.00291542
BnaC02g34060D	1.30715e-05	2.00179	AT2G01620	0.00294024
BnaA10g07730D	1.34145e-05	6.28186	AT5G51820	0.00300894
BnaA09g05920D	1.34913e-05	8.74035	AT5G62180	0.00301773
BnaC05g10550D	1.35308e-05	12.2893	AT1G14320	0.00301812
BnaC03g71930D	1.36812e-05	3.9164	AT2G32280	0.00304319
BnaC09g03700D	1.39487e-05	4.606	AT5G26260	0.0030941
BnaC09g03720D	1.43616e-05	4.37761	AT5G26230	0.00317688
BnaC02g33420D	1.44379e-05	3.70265	AT5G47660	0.00318498
BnaC06g41970D	1.46893e-05	5.37879	AT5G42480	0.00321925
BnaA09g28480D	1.47056e-05	8.42035	AT1G25375	0.00321925
BnaA09g05940D	1.47304e-05	3.85656	AT5G62200	0.00321925
BnaA08g05550D	1.47711e-05	-5.08317	AT4G14965	0.00321925
BnaA09g36350D	1.47943e-05	5.21041	AT3G57000	0.00321925
BnaC02g29360D	1.48831e-05	6.26934	AT4G10030	0.00322265
BnaA03g49680D	1.48904e-05	-1.28177	AT1G14350	0.00322265
BnaA06g24270D	1.50811e-05	4.24386	AT5G65380	0.00325511
BnaC09g03480D	1.51957e-05	3.83777	AT5G26751	0.00327103
BnaA09g05930D	1.53346e-05	6.65909	AT5G62190	0.00328994
BnaC02g32140D	1.53657e-05	4.38641	AT5G46210	0.00328994
BnaC07g23820D	1.55251e-05	10.5897	AT3G26750	0.0033152
BnaC09g37590D	1.56998e-05	8.20793	AT5G20190	0.00334272
BnaC03g65980D	1.57531e-05	14.026	AT4G34520	0.00334272
BnaA08g12610D	1.57792e-05	-6.7404	AT4G31270	0.00334272
BnaC03g04570D	1.58918e-05	5.43446	AT5G10940	0.00335771
BnaA08g04270D	1.627e-05	4.56781	AT4G36070	0.00341656
BnaA07g25020D	1.62715e-05	2.55408	AT1G67420	0.00341656
BnaC08g07800D	1.62984e-05	3.084	AT1G32150	0.00341656
BnaC05g08460D	1.64605e-05	5.72691	AT1G11070	0.00344153
BnaC03g62400D	1.66404e-05	7.05094	AT4G35630	0.00346312
BnaA08g09850D	1.6688e-05	10.1459	AT4G21090	0.00346312
BnaC02g36310D	1.66935e-05	10.3467	AT3G26744	0.00346312
BnaA08g08790D	1.67564e-05	8.452	AT1G36280	0.00346364
BnaC02g13190D	1.67825e-05	2.2992	AT5G55280	0.00346364
BnaC03g32930D	1.69504e-05	4.43258	AT3G02468	0.00348929
BnaA08g09860D	1.71592e-05	6.1261	AT4G21070	0.00352322
BnaC04g15110D	1.77288e-05	-2.50754	AT4G05510	0.00363086
BnaA08g12410D	1.79251e-05	2.32958	AT1G77520	0.00366171
BnaCnng61650D	1.82979e-05	2.97324	AT5G47500	0.00372181
BnaC02g42120D	1.83123e-05	3.21756	AT5G61220	0.00372181
BnaA08g01150D	1.83886e-05	-5.46279	AT1G53345	0.00372786
BnaA08g07100D	1.87304e-05	-9.17434	AT5G35930	0.00378757
BnaAnng21080D	1.90089e-05	9.82331	AT4G36760	0.00382604
BnaC05g21950D	1.90163e-05	6.38708	AT1G28580	0.00382604
BnaC02g39000D	1.93454e-05	-5.66602	AT5G49320	0.0038825
BnaC03g44910D	1.96497e-05	3.56788	AT3G21540	0.00393373
BnaA08g08980D	1.98954e-05	10.5697	AT4G19006	0.00397299
BnaA06g14500D	2.01756e-05	7.1078	AT1G20610	0.00401891
BnaA06g26790D	2.02553e-05	6.98327	AT5G24280	0.00402477
BnaC07g30500D	2.0638e-05	11.1657	AT5G23890	0.00409066
BnaC09g02310D	2.08726e-05	3.23948	AT5G48240	0.00412696
BnaA07g21640D	2.09818e-05	-3.25426	AT1G75540	0.00413833
BnaC02g29900D	2.115e-05	5.75075	/	0.00416126
BnaC03g61870D	2.19637e-05	7.64025	AT4G36700	0.00431076
BnaC09g03410D	2.21158e-05	4.59792	AT5G26910	0.00433
BnaA08g13660D	2.31558e-05	5.83448	AT4G28540	0.00452254
BnaC02g26450D	2.32247e-05	5.31126	AT5G24590	0.00452498
BnaA03g28700D	2.33036e-05	3.9956	AT3G04630	0.00452933
BnaA02g15970D	2.34065e-05	1.92272	AT1G72390	0.0045383
BnaA02g17360D	2.36598e-05	4.28236	AT1G75670	0.00456712
BnaC02g31030D	2.36691e-05	2.68464	AT5G44340	0.00456712
BnaC02g34370D	2.38778e-05	2.62037	AT2G02160	0.00459631
BnaA02g14230D	2.41578e-05	2.68494	AT1G69030	0.00463905
BnaC03g68780D	2.44737e-05	3.4079	AT1G51405	0.00468846
BnaA09g52530D	2.45853e-05	2.55224	AT5G66840	0.0046986
BnaC04g04230D	2.47487e-05	7.64265	AT2G45470	0.00471858
BnaA08g06760D	2.4939e-05	-7.17127	AT1G32700	0.00474004
BnaA09g06120D	2.49797e-05	3.82452	AT5G62560	0.00474004
BnaC07g27800D	2.52698e-05	4.31965	AT5G27330	0.00478376
BnaA08g05570D	2.56028e-05	9.33373	AT4G15000	0.00482471
BnaA07g05960D	2.56066e-05	4.03865	AT3G24110	0.00482471
BnaC02g23220D	2.58344e-05	7.71137	AT1G80280	0.0048562
BnaA08g09140D	2.59367e-05	10.8548	AT4G19200	0.00486401
BnaA02g14400D	2.60656e-05	3.83586	AT3G27740	0.00487676
BnaC03g64270D	2.62722e-05	4.26592	/	0.00490395
BnaA08g04810D	2.65993e-05	-6.39155	AT4G12760	0.00495347
BnaC02g29260D	2.71092e-05	4.59079	AT2G29550	0.00503671
BnaUnng04840D	2.72199e-05	2.05094	/	0.00504558
BnaC02g39190D	2.75565e-05	2.76187	AT5G49580	0.00509616
BnaC03g63540D	2.76366e-05	1.73841	AT4G20200	0.00509921
BnaCnng22230D	2.80125e-05	2.3835	AT2G01490	0.00513727
BnaA02g12050D	2.80398e-05	3.33627	AT1G65290	0.00513727
BnaA02g15680D	2.8135e-05	2.84798	AT1G71950	0.00513727
BnaC06g22310D	2.81486e-05	-4.04828	AT1G75540	0.00513727
BnaC02g33760D	2.81636e-05	2.64615	AT2G01250	0.00513727
BnaC03g63790D	2.85154e-05	10.4123	AT4G20270	0.00518961
BnaA09g06810D	2.86142e-05	-3.68664	AT5G64350	0.00519578
BnaA08g03990D	2.86864e-05	-8.01065	AT1G47250	0.0051971
BnaCnng07040D	2.87576e-05	-1.17984	AT3G21710	0.00519825
BnaA02g30710D	2.88835e-05	-3.04445	AT5G49320	0.00520925
BnaA02g17550D	2.89904e-05	4.1968	AT1G75840	0.00521677
BnaC08g35050D	2.94222e-05	10.4521	AT2G22475	0.00528261
BnaC03g66680D	2.96223e-05	4.51966	AT4G33330	0.00530175
BnaC04g34800D	2.96612e-05	5.10986	AT4G12750	0.00530175
BnaC03g51830D	2.99668e-05	9.51792	AT5G62230	0.00534443
BnaA08g03800D	3.01151e-05	9.83443	AT1G47420	0.00535895
BnaA08g23810D	3.05361e-05	7.81627	AT1G15500	0.00541901
BnaA04g06560D	3.06613e-05	9.14471	AT4G13840	0.00541901
BnaC04g10230D	3.06793e-05	12.4823	AT2G35120	0.00541901
BnaC03g08470D	3.08684e-05	9.43478	AT5G17440	0.00541901
BnaAnng29860D	3.08794e-05	8.42588	AT4G15410	0.00541901
BnaC02g39840D	3.09261e-05	3.80185	AT5G27740	0.00541901
BnaC02g23080D	3.09263e-05	3.13307	AT5G51280	0.00541901
BnaA08g10910D	3.10626e-05	2.73687	AT4G35060	0.005431
BnaC03g64660D	3.13233e-05	5.66304	AT4G21865	0.00546156
BnaA02g15820D	3.13737e-05	3.29256	AT1G72150	0.00546156
BnaA02g14900D	3.21888e-05	3.54107	AT1G70490	0.0055885
BnaC05g26530D	3.22562e-05	-5.05542	/	0.0055885
BnaA07g14200D	3.23124e-05	2.21874	AT5G37830	0.0055885
BnaC07g26500D	3.25575e-05	6.30753	AT5G48480	0.00560736
BnaA08g08580D	3.25614e-05	-4.29383	AT4G18160	0.00560736
BnaA03g16710D	3.34168e-05	3.36236	AT2G36410	0.00574231
BnaA08g05700D	3.35586e-05	4.2374	AT4G15510	0.00575433
BnaC02g27290D	3.36995e-05	3.30201	AT4G02460	0.00576121
BnaA08g02520D	3.37426e-05	-8.21103	AT1G49740	0.00576121
BnaA09g05660D	3.45638e-05	4.01764	AT5G61330	0.00587927
BnaC09g49440D	3.45879e-05	-2.47659	AT5G05965	0.00587927
BnaC02g42030D	3.47238e-05	4.09259	AT5G61140	0.00587927
BnaC01g04400D	3.47278e-05	3.84649	AT4G33925	0.00587927
BnaC09g03440D	3.4809e-05	2.80151	AT5G26850	0.00588059
BnaC08g10840D	3.52004e-05	2.72306	AT4G17000	0.0059342
BnaC08g46530D	3.53548e-05	3.33102	AT1G44800	0.00594771
BnaAnng34180D	3.55183e-05	9.14112	AT4G32720	0.00596268
BnaC03g61880D	3.57741e-05	9.9638	AT4G36690	0.00599306
BnaA06g19860D	3.60363e-05	6.33309	AT3G45780	0.00602438
BnaC05g31580D	3.62959e-05	14.2511	AT5G07440	0.00605514
BnaA02g12340D	3.65005e-05	4.1277	AT1G66070	0.00607573
BnaC01g29930D	3.65711e-05	2.73714	AT1G61800	0.00607573
BnaC02g47130D	3.76322e-05	3.50266	AT5G46110	0.00623521
BnaC03g75860D	3.76868e-05	10.6424	AT1G24510	0.00623521
BnaCnng35910D	3.81549e-05	-2.68486	AT1G32170	0.00629965
BnaC02g18560D	3.93894e-05	2.54985	AT1G53250	0.0064801
BnaA09g14240D	3.94097e-05	3.16301	AT1G60390	0.0064801
BnaA03g57280D	3.97624e-05	-2.98892	AT1G56220	0.00651521
BnaA09g06260D	3.97859e-05	3.06421	AT3G48050	0.00651521
BnaC08g08150D	4.12236e-05	16.8948	AT5G33320	0.00673685
BnaC03g66230D	4.13177e-05	-4.57007	AT4G34290	0.00673848
BnaC02g13200D	4.15116e-05	2.99343	AT5G55230	0.00675635
BnaC02g08160D	4.20978e-05	1.77564	AT5G18550	0.00683786
BnaA02g28060D	4.24432e-05	6.54426	AT3G26420	0.00686264
BnaC03g63960D	4.24579e-05	2.56629	AT4G20890	0.00686264
BnaA08g01030D	4.2538e-05	8.97509	AT1G53710	0.00686264
BnaC05g10580D	4.25932e-05	3.78979	AT1G14350	0.00686264
BnaCnng75420D	4.28905e-05	2.0187	AT2G21410	0.00689668
BnaC08g32240D	4.34924e-05	7.86304	AT3G62450	0.00697945
BnaC02g47650D	4.35961e-05	2.12306	AT2G01430	0.00698209
BnaA02g33320D	4.37546e-05	-6.86686	AT5G62260	0.00698432
BnaA09g05380D	4.38679e-05	4.28086	AT5G23300	0.00698432
BnaA03g29230D	4.38717e-05	6.42199	AT3G05910	0.00698432
BnaC01g30120D	4.42514e-05	4.66651	AT1G79540	0.0070308
BnaA02g33080D	4.44512e-05	7.09717	AT5G61960	0.00704856
BnaA08g09020D	4.47742e-05	10.351	AT4G19100	0.00708574
BnaA09g17440D	4.49415e-05	-3.53491	AT4G31700	0.00709818
BnaC03g76140D	4.56882e-05	11.5863	AT1G56070	0.00720191
BnaA02g33200D	4.59773e-05	5.82526	AT5G62150	0.00723325
BnaA08g03050D	4.60736e-05	-3.58755	AT1G48750	0.00723419
BnaC03g76270D	4.63088e-05	5.90746	AT4G39740	0.00724894
BnaA10g04660D	4.63888e-05	4.2741	AT1G07210	0.00724894
BnaC02g30770D	4.64391e-05	4.48333	AT5G44070	0.00724894
BnaC08g49240D	4.69135e-05	13.7471	AT4G39280	0.00729972
BnaA08g30350D	4.70023e-05	12.112	AT4G16650	0.00729972
BnaC02g32200D	4.70379e-05	3.29993	AT5G46280	0.00729972
BnaC08g05480D	4.71894e-05	9.73188	AT4G12760	0.00730211
BnaC05g02750D	4.73235e-05	9.27158	AT1G50920	0.00730211
BnaC08g36170D	4.73742e-05	10.2796	AT2G20860	0.00730211
BnaC02g47770D	4.74234e-05	2.41922	AT2G01820	0.00730211
BnaA08g11570D	4.75092e-05	2.31281	AT4G03430	0.00730211
BnaA08g09410D	4.78844e-05	4.61813	AT4G20380	0.00734567
BnaA05g35660D	4.81406e-05	3.84656	AT1G52740	0.00737085
BnaA09g08160D	4.82555e-05	-4.30857	AT5G65980	0.00737435
BnaA08g05240D	4.83998e-05	-6.42516	AT1G30810	0.00738231
BnaA08g03160D	4.87636e-05	-2.22308	/	0.00742366
BnaA07g30190D	4.90836e-05	6.0638	AT1G72440	0.00744516
BnaA09g06030D	4.90908e-05	2.79318	AT5G62360	0.00744516
BnaC03g68820D	4.9586e-05	5.99632	AT1G51380	0.00750604
BnaCnng21330D	5.16097e-05	2.74531	AT1G53330	0.00779511
BnaC02g39200D	5.16903e-05	3.71996	AT5G49580	0.00779511
BnaC04g19280D	5.20278e-05	4.75419	AT1G62085	0.00782152
BnaC08g36190D	5.20608e-05	12.5649	AT2G20830	0.00782152
BnaA02g13350D	5.22156e-05	3.26009	AT1G67785	0.00783009
BnaC06g21270D	5.23815e-05	9.72472	AT4G01090	0.00784028
BnaA08g11440D	5.25327e-05	5.70409	AT4G33790	0.00784775
BnaA10g29620D	5.26273e-05	2.86471	AT5G59980	0.00784775
BnaC03g65000D	5.2794e-05	6.51427	AT4G22550	0.00785797
BnaA03g31570D	5.3025e-05	-2.49122	AT1G72260	0.0078777
BnaC02g47720D	5.3247e-05	2.22698	AT2G01710	0.00789603
BnaCnng15760D	5.35195e-05	10.4167	AT5G63220	0.00792068
BnaC05g02100D	5.3611e-05	3.20177	AT1G03820	0.00792068
BnaA08g30760D	5.42963e-05	6.34365	AT4G28730	0.00800715
BnaC04g32410D	5.44086e-05	3.59384	AT3G09120	0.00800897
BnaC07g23560D	5.45383e-05	6.68117	AT3G26410	0.00801111
BnaA08g11020D	5.46232e-05	12.892	AT4G34700	0.00801111
BnaA04g05750D	5.4897e-05	4.06793	AT3G52105	0.00803655
BnaA04g20330D	5.55233e-05	11.0351	AT2G34750	0.00811339
BnaA03g08470D	5.59107e-05	2.45169	AT5G22310	0.00814061
BnaC04g25710D	5.59129e-05	12.5523	AT3G55140	0.00814061
BnaC07g41690D	5.63885e-05	2.6228	AT4G29020	0.00819496
BnaA02g15340D	5.65326e-05	3.39068	AT1G71070	0.00820102
BnaC05g35500D	5.74767e-05	6.29508	AT3G18000	0.0083229
BnaA02g09070D	5.80641e-05	-2.91056	AT5G55370	0.00836068
BnaC02g29130D	5.81083e-05	2.82033	AT4G10450	0.00836068
BnaA08g10930D	5.81363e-05	10.5082	AT4G34960	0.00836068
BnaAnng09900D	5.81552e-05	3.42435	/	0.00836068
BnaA08g13580D	5.83364e-05	2.6402	/	0.00836421
BnaA10g13540D	5.84699e-05	6.62378	AT5G60710	0.00836421
BnaA07g26180D	5.85493e-05	-6.69598	AT5G09730	0.00836421
BnaC09g14020D	5.89031e-05	-7.32842	AT1G61770	0.00836421
BnaC05g35160D	5.89456e-05	9.92412	AT3G18190	0.00836421
BnaAnng19860D	5.89836e-05	5.57927	/	0.00836421
BnaC05g49730D	5.90133e-05	4.90884	AT1G14340	0.00836421
BnaA03g27790D	5.90154e-05	6.29422	AT3G02200	0.00836421
BnaC09g04130D	5.92781e-05	4.3401	AT5G25150	0.00836968
BnaC08g44500D	5.92937e-05	-3.7746	AT1G05950	0.00836968
BnaC02g08260D	5.93676e-05	4.60261	AT5G18620	0.00836968
BnaA07g24990D	5.95612e-05	8.60895	AT1G67490	0.00838222
BnaA06g40110D	5.98135e-05	11.4975	AT5G47360	0.00840295
BnaC02g40890D	5.99793e-05	4.09756	AT5G25050	0.00841149
BnaC02g34690D	6.01245e-05	2.22872	AT2G02560	0.00841254
BnaA02g17480D	6.01969e-05	2.38507	AT1G75800	0.00841254
BnaA03g35240D	6.12432e-05	4.56526	AT3G19360	0.00854386
BnaC02g39140D	6.14982e-05	2.2172	AT5G01445	0.00856178
BnaA09g04510D	6.15855e-05	4.00591	AT5G25620	0.00856178
BnaCnng72890D	6.21123e-05	13.8423	AT4G22670	0.00862005
BnaC09g13180D	6.23636e-05	-6.30829	AT1G63350	0.00863995
BnaA08g15870D	6.25637e-05	7.48449	AT4G37910	0.0086527
BnaA06g23870D	6.32006e-05	7.65539	AT5G64940	0.00871675
BnaC02g31540D	6.32851e-05	2.80685	AT5G45330	0.00871675
BnaCnng50660D	6.33534e-05	4.53149	AT3G17465	0.00871675
BnaA02g15730D	6.35255e-05	3.07642	AT1G72040	0.00872349
BnaC02g33470D	6.36202e-05	4.42027	AT5G47710	0.00872349
BnaA05g09980D	6.40867e-05	4.10774	AT2G33700	0.00877243
BnaA02g33450D	6.48702e-05	3.20727	AT5G62520	0.00885427
BnaA03g06930D	6.49057e-05	4.02458	AT5G18180	0.00885427
BnaA02g32760D	6.52144e-05	-3.8797	AT1G45100	0.00888125
BnaC05g02690D	6.5392e-05	8.12592	AT1G04570	0.00889031
BnaC08g37350D	6.55668e-05	5.28386	AT3G17900	0.00889897
BnaC09g01370D	6.61242e-05	3.18192	AT3G27240	0.00895944
BnaAnng29160D	6.65393e-05	6.42398	AT3G59630	0.00898565
BnaA07g03050D	6.65421e-05	4.64403	AT2G17820	0.00898565
BnaA01g05180D	6.73368e-05	3.36441	AT3G44980	0.00907765
BnaA02g18660D	6.74539e-05	2.66605	AT1G77800	0.00907817
BnaC09g02660D	6.78969e-05	4.1326	AT5G49330	0.00911445
BnaA06g26740D	6.79881e-05	6.8116	AT5G24170	0.00911445
BnaC03g76990D	6.82296e-05	-7.05214	AT4G19870	0.00911445
BnaA02g14180D	6.82673e-05	3.94375	AT1G68920	0.00911445
BnaA07g24970D	6.84034e-05	3.82889	AT1G57820	0.00911445
BnaC04g23460D	6.84064e-05	6.15884	AT3G58660	0.00911445
BnaA09g16350D	6.85927e-05	11.2445	AT5G43280	0.00912408
BnaC02g33700D	6.89296e-05	2.64219	AT2G01170	0.00915369
BnaC04g55460D	6.9247e-05	7.79243	AT3G57560	0.00918061
BnaC04g13440D	6.94228e-05	2.47152	/	0.00918871
BnaC02g28870D	7.0209e-05	3.58037	AT4G11160	0.00926145
BnaA07g24500D	7.02252e-05	6.13674	AT1G68680	0.00926145
BnaC07g30190D	7.03194e-05	-3.53781	AT5G24270	0.00926145
BnaC07g48910D	7.07477e-05	4.82407	AT1G12810	0.00930256
BnaA09g05560D	7.11405e-05	3.27503	AT5G61000	0.00933888
BnaA08g04050D	7.14988e-05	-6.25131	AT1G47200	0.00937055
BnaC02g32570D	7.18703e-05	4.18549	AT5G46630	0.00940386
BnaC02g31570D	7.19984e-05	2.74829	AT5G45410	0.00940525
BnaC08g13010D	7.26243e-05	7.2987	AT4G28350	0.00947156
BnaA09g23090D	7.34137e-05	6.61364	AT4G09650	0.00955894
BnaCnng45920D	7.38833e-05	7.02352	AT1G48920	0.00960447
BnaA07g28490D	7.44134e-05	5.35885	AT1G69950	0.0096577
BnaC03g68230D	7.57387e-05	-3.95909	AT5G63820	0.00981379
BnaA08g07270D	7.6273e-05	-8.7563	AT5G34850	0.00985287
BnaC03g66920D	7.62863e-05	10.6526	AT4G32760	0.00985287
BnaC02g33250D	7.66097e-05	3.98301	AT5G47150	0.00987871
BnaC09g42220D	7.7147e-05	9.39742	AT5G15650	0.00992114
BnaCnng02730D	7.71866e-05	5.02999	AT5G03540	0.00992114
BnaA08g00930D	7.76865e-05	-4.57258	AT1G54080	0.00996939
BnaC04g40710D	7.81297e-05	3.95004	AT2G29670	0.0100102
BnaA09g06200D	7.8929e-05	4.20213	AT5G62710	0.0100965
BnaAnng31540D	7.91744e-05	-2.39002	AT4G29305	0.0101117
BnaA08g15320D	7.9371e-05	5.92988	AT1G63810	0.0101207
BnaC05g37790D	7.97907e-05	6.92545	AT5G11200	0.010158
BnaC08g31190D	7.99332e-05	5.01645	AT3G61250	0.01016
BnaC02g07160D	8.10601e-05	2.03058	AT1G44110	0.0102869
BnaC02g34200D	8.12562e-05	4.56992	AT3G08650	0.0102955
BnaA03g04300D	8.1774e-05	3.79196	AT5G13360	0.0103447
BnaC02g25730D	8.19229e-05	2.54185	/	0.0103472
BnaCnng13940D	8.23323e-05	4.90346	AT5G56300	0.0103826
BnaA09g31800D	8.29759e-05	-3.89756	AT5G62160	0.0104473
BnaC03g25340D	8.45385e-05	4.90496	AT1G10270	0.0106273
BnaC02g39110D	8.50079e-05	1.29554	/	0.0106696
BnaC08g47550D	8.55267e-05	2.22124	AT1G72730	0.0107179
BnaC05g51730D	8.60225e-05	5.82465	AT3G22550	0.0107632
BnaC03g60570D	8.61661e-05	5.26925	AT4G39380	0.0107643
BnaA03g49250D	8.65647e-05	1.24444	AT4G28410	0.0107973
BnaA03g39300D	8.67873e-05	11.6257	AT2G16770	0.0108082
BnaC07g42220D	8.75532e-05	3.90098	AT4G29905	0.0108817
BnaA09g34840D	8.76491e-05	10.0381	AT3G55120	0.0108817
BnaC06g43050D	8.84546e-05	5.43383	AT1G80080	0.0109628
BnaA08g30740D	8.85765e-05	4.51133	AT4G29010	0.0109628
BnaC09g02330D	8.88918e-05	2.20034	AT5G03780	0.0109849
BnaAnng23050D	8.93336e-05	-2.34074	AT4G30270	0.0110224
BnaA09g05620D	8.9502e-05	2.5421	AT5G61170	0.0110257
BnaA08g07370D	8.96355e-05	-8.19075	AT5G32470	0.0110257
BnaA02g17270D	8.98256e-05	3.30476	AT1G75510	0.0110322
BnaA06g24920D	9.06904e-05	9.15605	AT5G67610	0.0111213
BnaA08g14640D	9.12327e-05	8.55367	AT4G24770	0.0111707
BnaA08g13960D	9.19115e-05	3.61806	AT4G27940	0.0112366
BnaC08g20950D	9.24231e-05	2.45062	AT3G49260	0.0112679
BnaC02g48770D	9.24864e-05	5.32695	AT5G23630	0.0112679
BnaA08g02390D	9.25896e-05	-5.8625	AT1G49600	0.0112679
BnaA02g17350D	9.27304e-05	2.50438	AT1G75660	0.0112679
BnaAnng20850D	9.38125e-05	-3.74845	AT5G65610	0.0113679
BnaA10g17100D	9.38373e-05	5.9776	AT5G17630	0.0113679
BnaC03g58150D	9.44272e-05	8.84634	AT1G27850	0.0114177
BnaC03g61260D	9.46276e-05	9.58151	AT4G38550	0.0114177
BnaA02g11570D	9.46757e-05	-2.03461	AT5G50700	0.0114177
BnaC08g31440D	9.52203e-05	4.73715	AT3G61580	0.0114661
BnaA09g24740D	9.62442e-05	6.26084	AT1G31860	0.011572
BnaA08g13850D	9.65902e-05	8.6685	AT4G28200	0.0115962
BnaA09g52720D	9.67743e-05	4.03302	AT2G15290	0.0116009
BnaA02g35620D	9.6921e-05	2.22476	AT1G72220	0.0116011
BnaC09g04380D	9.79843e-05	4.61234	AT5G24470	0.0116864
BnaC03g77250D	9.81852e-05	-6.0881	/	0.0116864
BnaC02g12740D	9.82387e-05	2.16193	AT5G55920	0.0116864
BnaC02g34810D	9.83306e-05	3.51829	AT2G02820	0.0116864
BnaA08g09620D	9.84905e-05	11.1338	AT4G21670	0.0116864
BnaC02g33330D	9.86355e-05	3.17833	AT5G47540	0.0116864
BnaA08g15450D	9.86549e-05	5.17179	AT4G36870	0.0116864
BnaA02g16100D	9.93356e-05	6.40629	AT1G72730	0.0117478
BnaA02g13970D	9.94668e-05	1.43245	AT3G45940	0.0117478
BnaC02g41630D	9.97667e-05	4.73369	AT5G23440	0.0117579
BnaC03g74310D	0.00010002	13.2209	AT2G05320	0.0117579
BnaC03g66950D	0.000100221	2.6134	/	0.0117579
BnaC01g19120D	0.000100403	3.39432	AT5G62370	0.0117579
BnaA08g05660D	0.000100464	4.34966	AT4G15210	0.0117579
BnaA09g06240D	0.000100609	3.72504	AT5G62810	0.0117579
BnaA09g54560D	0.000100663	8.70613	AT1G23820	0.0117579
BnaC05g52090D	0.000100727	2.17141	AT3G14130	0.0117579
BnaA04g04690D	0.000101503	2.31038	AT3G53540	0.0118172
BnaC08g22580D	0.00010153	9.25754	AT3G51160	0.0118172
BnaC06g05490D	0.00010299	-3.95674	AT4G19540	0.0119697
BnaA03g07880D	0.000103289	7.00361	AT5G20070	0.0119871
BnaCnng06460D	0.000103494	10.2159	AT1G08880	0.0119935
BnaC09g30760D	0.00010394	7.54593	AT5G54390	0.0120278
BnaC02g34080D	0.000104721	3.90751	AT2G01640	0.0121006
BnaA02g33120D	0.000104927	-9.31782	AT5G62050	0.0121069
BnaC05g28330D	0.000106297	6.05001	AT1G32900	0.0122475
BnaC02g12850D	0.000108429	2.67845	AT5G55680	0.0124587
BnaC08g34820D	0.000108442	4.11825	AT3G07860	0.0124587
BnaC07g48130D	0.000108601	8.97723	AT2G18000	0.0124591
BnaC03g23120D	0.000108806	-2.15416	AT2G41080	0.0124648
BnaCnng39420D	0.000109859	3.78497	AT2G02880	0.012563
BnaA10g28370D	0.000109977	7.89645	AT5G52540	0.012563
BnaA09g05810D	0.000110891	2.88591	AT5G61790	0.0126493
BnaA02g08110D	0.000111138	-2.1092	AT5G57400	0.0126531
BnaA04g20940D	0.00011124	12.1977	AT1G56070	0.0126531
BnaC07g23850D	0.000111769	4.16058	AT5G16830	0.0126952
BnaA09g22460D	0.000112433	6.35089	AT4G10620	0.0127526
BnaA02g14020D	0.000112719	3.92619	AT1G68820	0.0127563
BnaA01g10880D	0.000112878	-2.28724	AT4G21020	0.0127563
BnaC07g43750D	0.000113064	-11.1885	AT4G32295	0.0127563
BnaAnng37740D	0.000113103	6.96479	AT3G54390	0.0127563
BnaA08g08940D	0.000113603	5.17933	AT4G18880	0.0127679
BnaC08g35690D	0.000113684	5.80113	AT2G21440	0.0127679
BnaA08g08340D	0.000113685	10.5748	AT4G17530	0.0127679
BnaCnng59700D	0.000114067	7.70232	AT3G15030	0.0127924
BnaC08g23490D	0.000114222	7.59834	AT3G52180	0.0127924
BnaC02g07020D	0.000114654	1.55648	AT5G17160	0.01281
BnaC02g33860D	0.000114699	3.77015	AT2G01270	0.01281
BnaC07g16080D	0.00011508	5.91899	AT5G67260	0.0128346
BnaA08g06940D	0.000115819	5.41974	AT1G32230	0.0128991
BnaC02g36390D	0.00011643	3.98353	AT5G14030	0.0129336
BnaC03g62010D	0.000116452	3.13317	AT4G36150	0.0129336
BnaUnng02990D	0.000116818	12.7416	AT1G24050	0.0129563
BnaCnng22770D	0.000117506	6.77096	AT2G17265	0.0130145
BnaA02g12280D	0.000118578	2.87268	AT1G65840	0.0131037
BnaA09g39150D	0.000118638	3.31109	AT3G61410	0.0131037
BnaA02g14310D	0.000119415	2.67719	AT1G69420	0.0131339
BnaA02g36050D	0.000119446	3.63761	AT1G77740	0.0131339
BnaC03g63590D	0.000119541	15.237	AT4G19600	0.0131339
BnaC02g33320D	0.000119567	3.51799	AT5G47530	0.0131339
BnaA08g29500D	0.000119912	6.65044	AT4G12750	0.0131536
BnaC07g40300D	0.000120572	-4.6626	/	0.013208
BnaA10g23250D	0.000121827	4.3849	AT5G08110	0.0133196
BnaC03g30930D	0.000122348	2.55471	AT4G08500	0.0133196
BnaA02g03550D	0.000122349	-4.22118	AT5G17350	0.0133196
BnaA07g13810D	0.000122505	2.31292	AT2G28330	0.0133196
BnaA07g02490D	0.000122523	5.8521	AT2G17230	0.0133196
BnaC05g12520D	0.000122636	-2.41908	AT1G16410	0.0133196
BnaA05g17360D	0.000122756	2.40254	AT3G05650	0.0133196
BnaA08g07170D	0.000123348	-7.94236	AT5G35100	0.0133658
BnaC09g04330D	0.000123666	5.31046	AT5G24590	0.0133822
BnaC02g33830D	0.00012395	2.94691	AT2G01260	0.0133948
BnaA02g17410D	0.000124258	1.793	AT1G75710	0.01341
BnaC08g12780D	0.000125229	3.66008	/	0.0134828
BnaC09g02550D	0.000125269	4.19897	AT5G48760	0.0134828
BnaC09g16120D	0.000125485	3.20018	AT3G62150	0.0134878
BnaC06g00420D	0.000125995	-6.93652	AT1G45249	0.0135245
BnaC06g16630D	0.000126379	-3.49436	AT3G58550	0.0135476
BnaA08g01330D	0.000127297	6.63297	AT1G53040	0.0136278
BnaA08g17640D	0.000128068	3.35599	AT1G29952	0.0136919
BnaC07g28600D	0.000128551	8.96835	AT5G26600	0.0137253
BnaC04g32860D	0.000129738	6.99621	AT5G40770	0.0138336
BnaA03g58190D	0.000130525	3.60924	AT4G18570	0.013899
BnaCnng08470D	0.000132213	4.07586	AT2G18510	0.0140601
BnaC02g05200D	0.000133062	2.16017	AT5G14240	0.0141316
BnaA07g04390D	0.000134739	6.43717	AT2G05920	0.0142907
BnaC08g36200D	0.000136328	11.222	AT2G20820	0.0144241
BnaC03g67830D	0.000136357	11.2782	AT4G30935	0.0144241
BnaA08g22790D	0.000136638	4.11586	AT1G18080	0.0144348
BnaA10g02860D	0.000137487	2.91164	AT1G04700	0.0145054
BnaA06g14300D	0.000138008	4.15934	AT1G20220	0.0145411
BnaA03g54190D	0.000138377	6.2732	AT4G37670	0.0145608
BnaC03g44800D	0.000138861	8.58129	AT3G24660	0.0145926
BnaA08g17670D	0.000139106	9.46793	AT1G29850	0.0145992
BnaC09g02280D	0.000139791	2.66965	AT5G48160	0.0146426
BnaC09g03760D	0.000139885	4.88267	AT5G26210	0.0146426
BnaA08g04950D	0.000141316	-4.59197	AT4G13070	0.0147731
BnaAnng08650D	0.000142008	-7.29004	AT4G29960	0.0148084
BnaC03g46450D	0.000142024	-4.50987	AT2G16580	0.0148084
BnaA05g30500D	0.00014307	7.17963	AT3G07050	0.0148981
BnaA02g17110D	0.000143393	3.49171	AT1G75060	0.0149066
BnaA09g47170D	0.000143597	4.23618	AT1G12380	0.0149066
BnaA05g03710D	0.00014371	1.79666	AT2G44065	0.0149066
BnaC01g19570D	0.000143946	3.50787	AT5G51820	0.0149086
BnaC05g23500D	0.000144102	3.01074	AT1G30515	0.0149086
BnaC02g47560D	0.000144834	3.96357	AT5G47050	0.0149534
BnaA03g58880D	0.000144958	8.85382	AT4G29040	0.0149534
BnaC09g12140D	0.000145095	-3.40764	/	0.0149534
BnaC01g28560D	0.000145334	4.09801	AT5G62190	0.0149588
BnaC02g41920D	0.000146392	4.9869	AT5G60990	0.0150311
BnaCnng04620D	0.000146412	6.22788	AT1G25510	0.0150311
BnaC03g60110D	0.000146855	7.28409	AT4G38650	0.0150572
BnaAnng08880D	0.000147423	8.2758	AT4G13850	0.0150962
BnaC02g44260D	0.000147804	3.21089	AT5G19400	0.0151158
BnaAnng06380D	0.00014845	-1.5016	AT5G07680	0.0151626
BnaC08g03190D	0.00014914	11.5518	AT1G48920	0.0152041
BnaC02g33640D	0.000149311	2.94499	AT2G01110	0.0152041
BnaA06g04970D	0.000149481	3.56333	AT1G08580	0.0152041
BnaA03g47600D	0.000149906	6.21331	AT4G25730	0.0152041
BnaCnng55280D	0.000149967	-9.19498	/	0.0152041
BnaC07g11130D	0.000149996	7.39336	AT3G15395	0.0152041
BnaAnng40540D	0.000150459	8.68761	AT5G61790	0.0152318
BnaA03g51370D	0.000150932	5.12831	AT4G31210	0.0152603
BnaC05g32510D	0.000151153	7.05802	AT3G20015	0.0152621
BnaA06g21690D	0.00015133	7.4538	AT5G62230	0.0152621
BnaC09g51960D	0.000152539	4.64631	AT5G38360	0.0153646
BnaC05g10820D	0.00015441	8.7457	AT1G14610	0.0155138
BnaA09g55440D	0.000154458	4.64978	AT3G59650	0.0155138
BnaC03g66830D	0.000154602	-6.61445	AT4G32950	0.0155138
BnaC03g64790D	0.000155325	-3.20664	AT4G22100	0.015549
BnaC02g42150D	0.000155513	3.61107	/	0.015549
BnaC05g15140D	0.000155534	4.41792	/	0.015549
BnaC09g27760D	0.000157673	-3.0767	AT5G40570	0.0157431
BnaA08g09760D	0.000158589	3.8765	AT4G21215	0.0158148
BnaC03g70280D	0.000159344	3.98309	AT1G55200	0.0158535
BnaC02g28900D	0.000159372	3.17576	AT4G11100	0.0158535
BnaA02g09320D	0.000159617	-1.7058	AT5G55050	0.0158582
BnaCnng38830D	0.000160453	10.8766	AT1G61730	0.0159063
BnaC09g37880D	0.000160667	8.06761	AT5G19780	0.0159063
BnaA07g10750D	0.000160698	9.09708	AT1G02090	0.0159063
BnaA02g15640D	0.000161779	2.19367	AT1G71900	0.0159936
BnaC02g33260D	0.000162489	3.3335	AT5G47150	0.0160322
BnaA06g37890D	0.000162675	3.16001	AT1G09470	0.0160322
BnaAnng15370D	0.000162771	2.65159	AT4G34850	0.0160322
BnaCnng12820D	0.000163825	4.0792	ATMG00516	0.0161162
BnaC05g28320D	0.000164403	5.93722	AT1G32900	0.0161366
BnaC03g66090D	0.000164435	11.686	AT4G34450	0.0161366
BnaC02g34300D	0.000165549	2.50699	AT2G02070	0.0162028
BnaA07g25060D	0.000165718	4.81678	AT1G67340	0.0162028
BnaA07g30080D	0.000165796	6.4392	AT1G72320	0.0162028
BnaC03g62580D	0.000166003	15.6518	AT4G35830	0.0162028
BnaA08g29820D	0.000166183	7.63523	AT4G13350	0.0162028
BnaA08g14310D	0.000166324	7.5509	AT4G26760	0.0162028
BnaA02g12790D	0.000167371	2.64234	AT1G67070	0.0162815
BnaA04g09740D	0.000167538	6.60428	AT5G39940	0.0162815
BnaCnng17640D	0.000167835	7.65582	AT2G18900	0.0162906
BnaA09g28970D	0.000168479	4.25484	AT1G26520	0.0163332
BnaA09g08500D	0.000168852	2.87348	AT4G34110	0.0163496
BnaC02g15470D	0.000169461	2.3706	AT5G51920	0.0163782
BnaA03g29120D	0.000169567	9.5721	AT3G05670	0.0163782
BnaA09g33760D	0.000169954	3.37226	AT3G53460	0.0163782
BnaAnng08080D	0.000169965	-1.97812	AT5G51700	0.0163782
BnaA02g12440D	0.000170628	2.48365	AT1G66250	0.0164043
BnaC08g11660D	0.000170704	13.0673	AT4G24440	0.0164043
BnaA02g12550D	0.000170972	4.36917	AT1G66740	0.0164043
BnaA08g04590D	0.000171055	-6.24411	AT1G42550	0.0164043
BnaC08g10440D	0.000171366	3.91356	AT4G15802	0.0164144
BnaCnng03750D	0.000171801	-3.59193	/	0.0164205
BnaC03g66290D	0.000171839	4.94248	AT3G44010	0.0164205
BnaC03g57650D	0.000172235	10.245	AT4G38680	0.0164343
BnaC02g29660D	0.000172445	5.11247	AT5G66750	0.0164343
BnaC03g61560D	0.0001726	-2.44543	AT5G31412	0.0164343
BnaC08g07690D	0.000173004	2.78544	AT1G32920	0.0164532
BnaC09g50930D	0.000173473	5.3066	AT5G62790	0.0164783
BnaA02g09490D	0.000175237	-2.61152	AT5G54690	0.0166044
BnaA02g26930D	0.000175752	-2.15081	AT2G01430	0.0166044
BnaC07g21960D	0.000175778	4.25779	AT2G02820	0.0166044
BnaA02g36270D	0.000175781	2.6443	AT1G80750	0.0166044
BnaC02g42130D	0.000175837	-4.26154	AT5G61240	0.0166044
BnaA06g14670D	0.00017796	8.06768	AT1G20830	0.0167785
BnaA07g03650D	0.0001781	5.60646	AT2G16570	0.0167785
BnaA03g09360D	0.000178729	-1.6977	AT5G60180	0.016814
BnaA10g02710D	0.000178941	3.09762	AT1G04570	0.016814
BnaC02g31730D	0.000179107	2.83818	AT5G45510	0.016814
BnaA08g12180D	0.000179944	-4.62934	AT4G32520	0.0168728
BnaC04g23500D	0.000180679	9.19666	AT3G58610	0.0169219
BnaC06g05990D	0.000181031	-1.84669	AT3G15450	0.016935
BnaC01g06580D	0.000182307	3.73605	AT4G31850	0.0170345
BnaC08g15580D	0.000182618	4.94191	AT1G12380	0.0170437
BnaC09g37000D	0.000182869	14.3586	AT5G20890	0.0170447
BnaA08g02960D	0.000183054	-9.21626	AT1G48880	0.0170447
BnaA09g49840D	0.000183494	5.3986	AT1G06590	0.0170451
BnaC03g65890D	0.000183656	7.37504	AT4G34670	0.0170451
BnaC05g50780D	0.000183697	6.69206	AT1G24100	0.0170451
BnaAnng08400D	0.000184077	4.16542	AT4G36070	0.0170605
BnaA06g36160D	0.000185106	9.49826	AT5G46160	0.0171304
BnaC03g61350D	0.000185259	6.0341	AT4G37590	0.0171304
BnaC07g40800D	0.000185663	7.69979	AT4G27250	0.017148
BnaC09g17360D	0.000186132	2.56036	AT1G23310	0.0171715
BnaAnng35740D	0.000186386	2.40895	AT2G01850	0.0171752
BnaC02g09010D	0.000186726	1.23325	AT5G19770	0.0171782
BnaC07g49960D	0.000186958	-6.47682	/	0.0171782
BnaC08g28300D	0.000187353	4.79596	AT3G57360	0.0171782
BnaC05g49370D	0.000187362	5.76557	AT1G13630	0.0171782
BnaC09g08360D	0.000187492	-6.29873	AT5G65980	0.0171782
BnaA08g05680D	0.000188092	6.5368	AT4G15430	0.0172135
BnaA07g24550D	0.000189165	7.40739	AT1G68580	0.0172919
BnaC02g26020D	0.000191341	3.26744	AT1G80860	0.0174631
BnaC08g24760D	0.000191474	12.9577	AT3G53750	0.0174631
BnaC02g30020D	0.000191846	2.73707	AT5G43010	0.0174772
BnaC05g48970D	0.00019292	3.63214	AT1G04680	0.0175551
BnaC04g52240D	0.000193562	-3.63066	AT2G40970	0.0175935
BnaC08g47150D	0.000193916	-1.81532	AT5G35110	0.0176039
BnaC04g01600D	0.000194389	7.92874	AT2G40840	0.0176039
BnaC07g46180D	0.000194463	13.4226	AT4G36700	0.0176039
BnaA07g25080D	0.000194556	5.27784	AT1G67325	0.0176039
BnaC03g20560D	0.000194922	-4.43143	AT4G03580	0.0176171
BnaA09g44590D	0.000195515	-4.47275	AT1G18390	0.0176508
BnaA06g36740D	0.00019593	2.83668	AT5G43360	0.0176683
BnaC02g29720D	0.000196252	2.28419	AT1G43170	0.0176775
BnaA06g03040D	0.000197471	5.17159	AT1G49720	0.0177673
BnaC07g15500D	0.000198832	9.01423	AT1G20220	0.0178697
BnaAnng20100D	0.000199163	4.21935	AT1G73230	0.0178793
BnaC07g08670D	0.000199752	7.51337	AT1G30880	0.0179121
BnaA08g00370D	0.000202053	-1.38323	AT1G55680	0.0180689
BnaC09g04760D	0.000202176	-1.92837	AT5G23660	0.0180689
BnaA05g11650D	0.000202177	2.87096	AT2G31070	0.0180689
BnaA02g35320D	0.000202501	-3.09318	AT4G25810	0.0180706
BnaA08g25120D	0.000202827	3.35511	AT1G11820	0.0180706
BnaA03g28670D	0.000202873	9.82185	AT3G04610	0.0180706
BnaA08g17360D	0.000203263	-5.47255	AT3G28980	0.0180791
BnaC03g37790D	0.000203601	2.46953	AT3G12700	0.0180791
BnaC02g13210D	0.000203646	1.90581	AT5G55220	0.0180791
BnaA07g05030D	0.000205387	10.512	AT3G25150	0.0181799
BnaC02g47640D	0.00020561	2.31835	AT2G01420	0.0181799
BnaCnng54360D	0.000205641	3.51693	AT1G65520	0.0181799
BnaC07g33060D	0.000205813	-2.48057	AT4G15530	0.0181799
BnaA03g28710D	0.000205917	2.82337	AT3G04650	0.0181799
BnaCnng25390D	0.000206613	7.27865	AT2G02955	0.0182126
BnaC09g03040D	0.00020714	1.58581	AT5G27220	0.0182126
BnaC03g77620D	0.000207524	5.64238	AT2G25160	0.0182126
BnaC04g20730D	0.000207628	8.17801	AT3G63300	0.0182126
BnaA09g13630D	0.000207936	6.44703	AT1G61730	0.0182126
BnaA07g36280D	0.000208061	8.09577	AT2G17265	0.0182126
BnaAnng31420D	0.000208283	-0.850544	AT3G03470	0.0182126
BnaC09g11930D	0.000208292	8.71923	AT1G64190	0.0182126
BnaC05g40790D	0.000208334	3.72002	AT3G12270	0.0182126
BnaA06g04460D	0.00020936	-3.01366	AT1G07985	0.0182639
BnaCnng26200D	0.00020942	4.62923	AT1G69295	0.0182639
BnaC02g33390D	0.000209605	3.48752	AT5G47630	0.0182639
BnaC02g13370D	0.000210535	2.03712	AT5G55070	0.0183029
BnaCnng65700D	0.000210555	2.14003	AT5G19290	0.0183029
BnaC04g19870D	0.000210761	8.2289	AT2G39130	0.0183029
BnaC02g24390D	0.000210976	-1.58078	AT1G75490	0.0183029
BnaC02g40260D	0.000211195	6.46078	AT1G56070	0.0183029
BnaC06g41800D	0.000211466	0.382682	AT4G14220	0.0183052
BnaC03g60480D	0.000211791	7.93576	AT4G39230	0.0183052
BnaC03g58240D	0.000211907	7.83342	AT1G28060	0.0183052
BnaC02g46860D	0.000212228	4.22933	AT5G47455	0.0183132
BnaA08g11560D	0.000212785	-2.87641	AT4G33560	0.0183414
BnaA05g20080D	0.000213087	4.45789	AT3G20830	0.0183477
BnaC03g49430D	0.000214585	11.1425	AT5G64830	0.0184336
BnaC02g28350D	0.000214643	4.22575	/	0.0184336
BnaC08g12580D	0.000215136	2.94867	AT4G27652	0.0184336
BnaC04g08780D	0.000215235	3.53031	AT2G36530	0.0184336
BnaUnng01990D	0.000215357	5.1581	/	0.0184336
BnaA09g06770D	0.000215466	3.63851	AT5G64270	0.0184336
BnaC05g01160D	0.000217136	4.82698	AT1G02370	0.0185567
BnaA02g12760D	0.000217446	2.75229	AT1G67040	0.0185633
BnaA04g03470D	0.000217754	4.2127	AT3G55605	0.0185698
BnaC05g18370D	0.000218097	13.9806	AT1G22970	0.0185793
BnaC02g33400D	0.000219337	2.79765	AT5G47640	0.0186651
BnaA08g03510D	0.000220537	-6.26829	AT1G48140	0.0187473
BnaCnng35560D	0.00022135	13.7322	AT5G35400	0.0187811
BnaA07g00390D	0.000221404	-4.27802	AT5G48930	0.0187811
BnaA09g21890D	0.000222795	3.87834	AT4G11240	0.0188587
BnaC07g10580D	0.000223	4.8168	AT1G28290	0.0188587
BnaC08g11120D	0.000223423	11.1396	AT4G17950	0.0188587
BnaA05g36400D	0.000223837	6.15515	AT1G48920	0.0188587
BnaA04g28480D	0.000224095	3.74939	AT2G29670	0.0188587
BnaA09g54860D	0.000224118	10.7548	AT3G55050	0.0188587
BnaA09g06740D	0.000224177	2.58494	AT5G64180	0.0188587
BnaC02g09210D	0.000224203	1.01086	AT5G19900	0.0188587
BnaA08g03140D	0.000224626	4.86237	AT1G48610	0.0188745
BnaA09g30410D	0.000225087	10.2513	AT1G22730	0.018889
BnaA08g01230D	0.000225421	-4.27413	AT1G53270	0.018889
BnaA03g34420D	0.000225507	6.37549	AT3G17120	0.018889
BnaA02g16510D	0.000226227	4.30734	AT1G73650	0.0189295
BnaA06g13880D	0.000228092	7.07266	AT1G19715	0.0190657
BnaCnng25220D	0.000229598	3.6527	AT4G10710	0.0191705
BnaA05g09790D	0.000230012	3.95628	AT2G33860	0.0191705
BnaA02g15960D	0.000230114	1.23517	AT1G72370	0.0191705
BnaC05g34570D	0.000230304	5.47624	AT3G18600	0.0191705
BnaA09g33880D	0.000230598	5.84746	AT3G53630	0.0191751
BnaC03g60460D	0.000231107	5.19711	AT4G39200	0.0191975
BnaC03g39500D	0.000231559	3.66886	AT3G29635	0.019215
BnaC07g23810D	0.000232227	-6.56563	AT3G26720	0.0192364
BnaC09g22750D	0.00023248	5.37503	AT4G04614	0.0192364
BnaC02g31920D	0.000232726	2.65356	AT5G45900	0.0192364
BnaA04g10410D	0.000232777	2.45431	AT5G40530	0.0192364
BnaAnng36070D	0.000234422	4.60556	AT3G21690	0.0193524
BnaCnng71380D	0.000234867	12.6932	AT3G51950	0.0193692
BnaC06g19030D	0.000235262	7.35699	AT1G79990	0.019372
BnaC08g48860D	0.000235441	3.90637	AT3G59350	0.019372
BnaC03g45040D	0.000235628	8.54656	AT2G05990	0.019372
BnaA09g24150D	0.000236762	5.86855	AT1G32860	0.0194453
BnaC02g12830D	0.000237238	1.25405	AT5G55700	0.0194598
BnaA02g14340D	0.000237492	2.20205	AT1G69530	0.0194598
BnaA05g29440D	0.000237768	4.82001	AT2G03460	0.0194598
BnaA02g18530D	0.00023791	4.40913	AT1G77140	0.0194598
BnaC03g52550D	0.000238812	4.79872	AT3G49240	0.0194953
BnaC03g58120D	0.000238831	6.95536	AT1G27752	0.0194953
BnaC06g19080D	0.000239552	7.69785	AT1G80270	0.0195342
BnaC01g39210D	0.000239813	5.16249	AT3G09070	0.0195356
BnaCnng22220D	0.000241766	2.464	AT2G01480	0.0196665
BnaA08g14490D	0.000242247	-4.35511	AT4G26080	0.0196665
BnaA08g02920D	0.000242357	-8.50929	AT1G48950	0.0196665
BnaA09g34480D	0.000242403	8.58598	AT3G54650	0.0196665
BnaC02g41800D	0.000243163	3.21005	AT5G08130	0.0197083
BnaA08g29770D	0.000243683	15.753	AT1G42430	0.0197193
BnaC08g47190D	0.000243792	12.9959	AT5G35180	0.0197193
BnaC02g31820D	0.00024409	3.35609	AT3G07860	0.0197235
BnaC05g02760D	0.000245016	6.78188	AT1G04730	0.0197784
BnaC02g28880D	0.000245903	2.29665	AT4G11150	0.01983
BnaC02g28920D	0.000246702	3.12208	AT4G11030	0.0198744
BnaC03g37500D	0.000247869	9.02644	AT3G12290	0.0199307
BnaA06g13730D	0.000248144	5.81677	AT1G19520	0.0199307
BnaC02g42350D	0.000248147	2.73791	AT5G62890	0.0199307
BnaA02g05230D	0.000249269	1.84567	AT5G21100	0.0200007
BnaC03g45290D	0.000251438	4.5471	AT2G13790	0.0201546
BnaA04g07120D	0.000252121	8.31938	AT4G13050	0.0201782
BnaC02g06990D	0.000252661	1.58168	AT5G17050	0.0201782
BnaC05g16650D	0.000252923	-4.43412	AT1G21390	0.0201782
BnaAnng35340D	0.000253085	4.10473	AT1G17147	0.0201782
BnaA03g51030D	0.000253145	5.49092	AT4G34250	0.0201782
BnaC07g21860D	0.000253245	8.15341	AT2G02740	0.0201782
BnaA09g06220D	0.000254016	3.76605	AT5G62770	0.0202196
BnaA09g19860D	0.000254668	2.85103	AT4G05190	0.0202342
BnaA05g11320D	0.000254705	2.23724	AT1G07920	0.0202342
BnaA09g25340D	0.000255809	4.79996	AT3G02120	0.0203017
BnaCnng35810D	0.00025627	10.4044	AT2G42910	0.0203182
BnaA02g14990D	0.000256675	1.81656	AT1G70560	0.0203302
BnaC04g32770D	0.000257359	2.02595	AT5G40640	0.020351
BnaC03g62120D	0.000257447	4.07521	AT3G14130	0.020351
BnaA02g04680D	0.000258363	7.76579	AT5G20070	0.0203853
BnaC02g34760D	0.000258572	2.29919	AT2G02760	0.0203853
BnaA06g04200D	0.000258874	2.17575	AT1G07770	0.0203853
BnaC08g24170D	0.000259045	1.85964	AT3G52960	0.0203853
BnaA06g05050D	0.000259154	0.965476	AT1G08700	0.0203853
BnaA05g19420D	0.000260382	10.6217	AT3G21820	0.0204513
BnaA04g06220D	0.000260503	5.1407	AT3G23660	0.0204513
BnaC08g09320D	0.000260925	7.51757	AT1G31070	0.0204644
BnaC07g11440D	0.000261658	9.07899	AT4G38680	0.020499
BnaC03g61570D	0.000261879	-2.27757	AT2G11950	0.020499
BnaC01g36680D	0.000262489	4.77672	AT3G14660	0.0205267
BnaC05g47700D	0.000262956	-1.94402	AT3G03890	0.0205431
BnaA04g16160D	0.000264054	3.11454	AT2G27970	0.0206089
BnaC08g31410D	0.000264666	3.22872	AT3G61530	0.0206365
BnaCnng23290D	0.000264926	1.33896	AT4G02230	0.0206366
BnaA02g27910D	0.000265329	-2.73613	/	0.020648
BnaA07g19990D	0.000265784	9.63784	AT1G80680	0.0206633
BnaA02g35710D	0.000266659	2.70342	AT1G69840	0.0207112
BnaC05g40560D	0.000267477	3.33182	AT3G12670	0.0207297
BnaA04g05680D	0.000267592	8.01884	AT3G52140	0.0207297
BnaC08g20790D	0.000267674	9.35985	AT3G49100	0.0207297
BnaC04g18920D	0.000269013	1.84567	AT1G61667	0.0208133
BnaA09g28880D	0.000269694	6.67907	AT1G26370	0.0208458
BnaC02g34780D	0.000271185	2.69229	AT2G02790	0.0209376
BnaA04g29080D	0.000271428	1.99632	AT2G35040	0.0209376
BnaC02g09300D	0.000271666	1.11205	AT5G19990	0.0209376
BnaCnng12780D	0.000271972	4.63737	ATMG00160	0.0209411
BnaA02g03060D	0.000272514	-2.85908	AT5G16460	0.0209627
BnaC04g36290D	0.00027313	6.13404	AT2G24580	0.0209898
BnaA02g33250D	0.000273533	3.03161	AT3G59820	0.0210007
BnaA03g17710D	0.000273829	3.43115	/	0.0210033
BnaA08g11160D	0.000275067	-4.45487	AT4G34460	0.0210781
BnaAnng04510D	0.000275608	3.47024	AT1G35780	0.0210993
BnaA02g14600D	0.000276161	2.7594	AT1G69210	0.0211215
BnaA06g09980D	0.000276656	10.8675	AT1G15300	0.0211391
BnaC02g42040D	0.000279154	4.05435	AT5G61150	0.0212985
BnaC02g12710D	0.000279476	2.00677	AT5G55990	0.0212985
BnaC09g49130D	0.00027954	3.31331	AT3G11710	0.0212985
BnaC02g13450D	0.000280713	-4.76338	AT3G02020	0.0213308
BnaC07g50460D	0.000280753	2.91226	AT4G27657	0.0213308
BnaCnng77290D	0.000280764	4.90808	AT3G29780	0.0213308
BnaA02g13720D	0.000281388	2.67023	AT1G68310	0.0213581
BnaA02g12890D	0.000282209	3.89337	AT5G40480	0.0214001
BnaAnng05360D	0.000284838	9.83573	AT5G44860	0.0215789
BnaC04g04050D	0.000285945	8.89575	AT2G40360	0.0216231
BnaC05g07760D	0.00028596	7.17879	AT1G10010	0.0216231
BnaA07g30100D	0.000286716	3.76924	AT1G72340	0.0216598
BnaC04g08700D	0.00028749	3.36044	AT2G36620	0.0216978
BnaA08g08180D	0.000288252	7.24911	AT4G17060	0.0217347
BnaC03g04410D	0.000288522	9.4817	AT5G10550	0.0217347
BnaA02g33110D	0.00028883	5.83027	AT5G61980	0.0217374
BnaC05g15900D	0.000290014	1.66796	AT1G20610	0.021806
BnaC03g68240D	0.000292246	-3.00211	AT5G63820	0.0219466
BnaA04g29210D	0.000292432	4.57549	AT2G37220	0.0219466
BnaCnng16950D	0.000293493	4.49784	AT1G23490	0.0220056
BnaC05g32550D	0.000294558	11.5544	AT3G20000	0.0220649
BnaC03g35200D	0.000296	7.26756	AT3G07330	0.0221522
BnaA09g24780D	0.000296405	5.25329	AT1G31850	0.0221618
BnaAnng40650D	0.000296856	-3.57992	AT5G05440	0.0221748
BnaA09g28600D	0.000297371	5.77497	AT1G25520	0.0221851
BnaAnng37880D	0.000297549	-0.626025	AT5G38710	0.0221851
BnaC08g34250D	0.000298374	2.16158	AT2G24100	0.022226
BnaC09g21130D	0.000298715	5.89224	AT1G65840	0.0222307
BnaA09g17540D	0.000299233	-3.37626	AT5G45310	0.0222413
BnaA05g20990D	0.000299413	5.92052	AT3G19210	0.0222413
BnaA03g47440D	0.000304226	7.33931	AT3G48380	0.0225779
BnaC03g39240D	0.000304786	7.37794	AT3G15680	0.0225985
BnaCnng10140D	0.000305439	5.44659	/	0.022626
BnaA09g36160D	0.000305833	5.02383	AT3G56860	0.0226342
BnaA09g17250D	0.000306863	7.12453	AT1G80500	0.0226488
BnaC02g28890D	0.000306972	2.51424	AT4G20330	0.0226488
BnaA02g20220D	0.000307088	9.95068	AT1G64750	0.0226488
BnaC02g33100D	0.000307161	3.09735	AT5G47080	0.0226488
BnaA08g03880D	0.000308139	-4.68966	AT1G47280	0.022687
BnaA05g14610D	0.000308247	9.19564	AT1G53200	0.022687
BnaA06g22480D	0.000308891	6.85905	AT5G63010	0.0227136
BnaA09g05550D	0.000310167	3.28572	AT5G60980	0.0227865
BnaA04g04210D	0.000310459	8.84542	AT3G54250	0.022787
BnaA08g07440D	0.000311976	-4.16742	AT5G37340	0.0228592
BnaC05g50330D	0.000312041	4.13019	AT1G21050	0.0228592
BnaA05g35000D	0.000312299	5.13377	AT1G56200	0.0228592
BnaC02g39130D	0.000314777	4.52698	AT3G06670	0.0230083
BnaC03g33870D	0.000315065	10.7669	AT3G04710	0.0230083
BnaA07g12270D	0.000315198	-2.18473	AT5G66900	0.0230083
BnaC07g50630D	0.000315826	7.00253	AT4G28190	0.0230331
BnaC07g43040D	0.000316664	5.74856	AT4G30960	0.0230732
BnaA02g14110D	0.000317514	1.36929	AT1G68890	0.0231141
BnaA03g25610D	0.000321407	5.58394	AT4G04940	0.0233763
BnaC05g23000D	0.000321877	-2.19628	AT1G30040	0.0233886
BnaC08g30550D	0.00032216	8.74501	AT3G61090	0.0233886
BnaC02g37270D	0.00032314	3.81103	AT5G13930	0.0234385
BnaC09g19910D	0.000323679	9.55423	AT5G47020	0.0234456
BnaC04g20760D	0.000323824	9.57112	AT3G63250	0.0234456
BnaC03g62030D	0.000324599	3.02099	AT4G36140	0.0234805
BnaC02g34540D	0.000324943	3.92957	AT2G02450	0.0234841
BnaC02g30730D	0.000326044	6.83341	AT5G43990	0.0235191
BnaA06g37110D	0.00032644	13.6805	AT5G42540	0.0235191
BnaC02g38610D	0.000326764	5.39412	AT5G48450	0.0235191
BnaA07g26010D	0.000326931	3.77668	AT1G66780	0.0235191
BnaA05g10070D	0.000326978	3.46279	AT2G33510	0.0235191
BnaA06g14260D	0.000327189	7.34524	AT2G25700	0.0235191
BnaC02g08020D	0.000328308	2.06296	AT3G25510	0.0235784
BnaC08g08070D	0.000329065	5.19322	AT5G34940	0.0235962
BnaC07g15670D	0.000329145	-2.76801	AT3G10180	0.0235962
BnaA03g47570D	0.000330143	1.72355	AT4G25630	0.0236466
BnaA09g52750D	0.000331621	1.55339	AT2G14910	0.0237312
BnaC01g03230D	0.000334088	2.53225	AT4G35320	0.0238864
BnaC02g31850D	0.000334987	2.05442	AT5G45775	0.0239202
BnaC04g17230D	0.000335438	6.37498	AT2G26730	0.0239202
BnaC06g31320D	0.000335654	2.43015	AT1G70230	0.0239202
BnaC09g33410D	0.000335756	6.53633	AT5G56890	0.0239202
BnaA10g10830D	0.000337102	8.15552	AT5G56680	0.0239948
BnaA06g16290D	0.000338834	5.05067	AT3G48980	0.0240966
BnaC03g48340D	0.000341983	7.98785	AT2G18330	0.0242951
BnaC02g44250D	0.000342231	1.35872	AT5G19390	0.0242951
BnaA03g08070D	0.000342571	1.92313	AT5G20290	0.0242977
BnaA03g34250D	0.000343922	11.3762	AT3G16640	0.0243719
BnaC09g43820D	0.000346507	7.49548	AT5G13260	0.0245334
BnaC05g09480D	0.000347675	7.76565	AT1G12330	0.0245943
BnaA07g11960D	0.000348178	6.42229	AT5G67280	0.0246082
BnaC03g60720D	0.000348797	13.6345	AT4G39850	0.0246302
BnaCnng39430D	0.000349435	2.83235	AT2G02910	0.0246535
BnaA03g40010D	0.000350676	5.04037	AT3G62200	0.0246899
BnaC01g04810D	0.000350815	2.80135	AT4G33400	0.0246899
BnaC02g10380D	0.000351017	3.60111	AT5G59010	0.0246899
BnaC06g09640D	0.00035151	-4.35814	AT1G52342	0.0246899
BnaC05g18490D	0.00035154	7.74741	AT1G23190	0.0246899
BnaA08g15810D	0.000351801	7.5416	AT4G37830	0.0246899
BnaA09g24880D	0.000353019	2.82776	AT4G08685	0.0247537
BnaC05g14530D	0.000356488	6.74697	AT1G18850	0.024975
BnaA08g10140D	0.000358287	9.85389	AT4G22120	0.0250532
BnaA02g33340D	0.00035845	4.82282	AT5G62290	0.0250532
BnaA09g21320D	0.000358543	4.31933	AT4G11850	0.0250532
BnaA02g12820D	0.000359376	3.31285	AT1G67080	0.0250699
BnaC03g76830D	0.000359406	-3.10988	AT1G36280	0.0250699
BnaA06g14330D	0.00036094	5.0239	AT1G20260	0.0251549
BnaC08g10600D	0.00036392	6.62657	AT4G16265	0.0253405
BnaCnng55860D	0.000365219	1.39736	AT5G38430	0.0254089
BnaC05g18200D	0.00036688	10.5388	AT1G22910	0.0254896
BnaA09g22120D	0.000367016	3.13644	AT4G11080	0.0254896
BnaC01g03250D	0.000368801	5.1653	AT4G35300	0.0255914
BnaA08g03870D	0.00037026	13.7258	AT1G80460	0.0256704
BnaA09g31060D	0.000370782	3.8764	AT1G23410	0.0256844
BnaA09g54630D	0.000371483	7.14248	AT1G23980	0.0257107
BnaCnng57390D	0.000374083	4.80374	AT5G47770	0.0258327
BnaC05g14280D	0.000374715	8.28366	AT1G18600	0.0258327
BnaA08g31010D	0.000374745	5.37296	AT4G25630	0.0258327
BnaC08g16920D	0.000374943	2.47956	AT1G16330	0.0258327
BnaA09g43150D	0.000375049	-1.46484	AT2G21490	0.0258327
BnaA08g13480D	0.000375182	2.73822	AT4G29260	0.0258327
BnaA09g30060D	0.000375603	7.62572	AT1G23190	0.0258395
BnaC08g23660D	0.000376453	6.52922	AT3G52430	0.0258757
BnaC02g39080D	0.000376878	1.62206	AT5G49460	0.0258827
BnaA08g07580D	0.000377253	8.43293	AT4G14040	0.0258863
BnaC04g55250D	0.000379451	11.5098	AT3G60880	0.0260044
BnaC03g48030D	0.000379623	-4.25033	AT2G17760	0.0260044
BnaC04g31470D	0.000380095	9.92594	AT4G26900	0.0260144
BnaC02g08820D	0.000381295	1.45051	AT5G19550	0.0260678
BnaC07g43740D	0.000381526	-6.62575	AT4G32290	0.0260678
BnaC02g33120D	0.000382766	3.27836	AT5G47100	0.0261302
BnaA09g30240D	0.000384462	6.90523	AT1G22950	0.0262071
BnaA08g05860D	0.000384546	5.13226	AT4G15770	0.0262071
BnaC02g25390D	0.000385371	-4.86837	AT1G78995	0.0262409
BnaCnng44950D	0.000386077	3.36738	AT4G13840	0.0262667
BnaC02g39120D	0.000387459	4.61277	AT3G06670	0.0263383
BnaA06g22980D	0.000388268	8.01314	AT5G63860	0.0263501
BnaC03g30050D	0.000388455	3.92783	AT4G04940	0.0263501
BnaC08g48080D	0.00038862	5.72352	AT4G16140	0.0263501
BnaC02g34220D	0.000389109	2.23234	AT2G01970	0.026361
BnaC07g32120D	0.000389689	2.62067	AT3G51190	0.0263779
BnaA04g29260D	0.000390157	8.72072	AT2G39280	0.0263874
BnaA07g13860D	0.00039243	2.5756	AT2G28390	0.0265187
BnaA10g01080D	0.00039422	3.24858	/	0.0265924
BnaC01g37010D	0.000394628	-2.22939	AT3G14310	0.0265924
BnaA08g08630D	0.000395087	2.68796	AT4G18210	0.0265924
BnaA06g15490D	0.000395101	4.62895	AT1G21740	0.0265924
BnaA10g09210D	0.000395182	8.54097	AT5G54910	0.0265924
BnaA08g05870D	0.000396424	-9.62609	AT4G15780	0.0266536
BnaA08g14050D	0.000396869	3.87438	AT4G27595	0.0266612
BnaA05g20100D	0.000398038	3.54334	AT3G20810	0.0267173
BnaA06g16180D	0.000399344	2.49974	AT3G49080	0.0267705
BnaA06g12390D	0.0003995	5.28834	AT1G18250	0.0267705
BnaC03g59440D	0.000400087	8.28045	AT1G29750	0.0267874
BnaA10g19210D	0.000400517	7.09323	AT5G14600	0.0267938
BnaAnng17950D	0.000402139	8.08247	AT4G38210	0.0268413
BnaA07g13390D	0.000402337	6.36007	AT5G27300	0.0268413
BnaC06g38980D	0.000402508	5.86561	AT1G78560	0.0268413
BnaC03g38840D	0.000402871	7.2977	AT3G15000	0.0268413
BnaC08g27430D	0.000402903	10.292	AT3G56510	0.0268413
BnaC02g33880D	0.000403791	4.09158	AT2G01290	0.0268781
BnaC01g10190D	0.000405021	2.33655	AT2G07170	0.0269132
BnaCnng39410D	0.000405165	2.48324	AT2G02870	0.0269132
BnaC07g24140D	0.000405327	7.89513	AT3G27280	0.0269132
BnaA03g09210D	0.000407195	2.40777	AT5G59850	0.0270149
BnaC02g34990D	0.000408843	4.62626	AT2G03340	0.0271017
BnaC06g11500D	0.000409265	7.85559	AT4G15000	0.0271073
BnaA08g08140D	0.000410461	2.45361	AT4G16830	0.027164
BnaA04g16110D	0.000411844	3.19103	AT2G27920	0.027217
BnaC08g06850D	0.000412212	0.937477	AT1G34580	0.027217
BnaA03g49260D	0.000412281	6.99662	AT4G28440	0.027217
BnaCnng72860D	0.000412893	2.05273	AT1G72730	0.027235
BnaCnng60790D	0.000413385	9.96045	AT4G33380	0.0272378
BnaC01g14980D	0.000413617	4.01431	AT4G23410	0.0272378
BnaC05g01880D	0.000414593	8.96582	AT1G03310	0.0272797
BnaC03g77120D	0.000415196	2.94962	AT4G33980	0.0272851
BnaC02g30260D	0.000415356	2.36203	AT1G33140	0.0272851
BnaA08g30430D	0.000418096	3.90718	AT5G40840	0.0274295
BnaAnng15460D	0.000418426	6.00584	AT1G07920	0.0274295
BnaC08g16730D	0.000418583	6.1806	AT1G15690	0.0274295
BnaC06g42440D	0.000419055	1.73991	AT5G41370	0.027438
BnaC05g28630D	0.000420148	12.2814	AT1G32440	0.0274701
BnaA02g28590D	0.000420231	7.54744	AT3G27080	0.0274701
BnaA03g17990D	0.000422129	4.87762	AT2G38660	0.0275716
BnaC08g11770D	0.000423185	8.65677	AT4G24770	0.0276181
BnaA01g16870D	0.000425166	2.65057	AT4G28070	0.0277174
BnaCnng61170D	0.000425735	-3.28298	AT5G61370	0.0277174
BnaCnng29620D	0.000425817	11.3624	AT1G26110	0.0277174
BnaC08g44860D	0.000426092	-3.41535	AT1G06650	0.0277174
BnaC02g07110D	0.000428113	2.05323	AT5G17220	0.0278207
BnaC09g37120D	0.000428444	2.52754	AT5G20740	0.0278207
BnaC02g12450D	0.000428722	1.51876	AT5G56150	0.0278207
BnaC03g61060D	0.000429808	10.5733	AT4G38100	0.0278686
BnaA05g19700D	0.000430376	6.93762	AT3G21465	0.0278829
BnaA08g00920D	0.00043245	-5.80265	AT1G54090	0.0279845
BnaC07g31620D	0.000432784	5.61149	AT3G49990	0.0279845
BnaCnng41730D	0.000432994	2.11552	AT5G47870	0.0279845
BnaA06g23560D	0.000435194	1.29897	AT5G64570	0.0281041
BnaA07g38350D	0.000436436	4.25746	AT1G80270	0.0281616
BnaA08g30820D	0.000437406	5.20278	AT4G25740	0.0282014
BnaAnng08950D	0.000438337	11.1518	AT4G13750	0.0282249
BnaC09g03560D	0.000438475	4.54583	AT5G26710	0.0282249
BnaC07g46320D	0.000438967	6.33444	AT4G36830	0.0282339
BnaC02g23070D	0.000439561	8.46051	AT1G80480	0.0282472
BnaC03g60150D	0.000439954	3.07535	AT4G38730	0.0282472
BnaCnng48800D	0.000440233	5.3139	AT1G74240	0.0282472
BnaA07g30140D	0.000440707	5.92174	AT1G72370	0.0282544
BnaA10g20660D	0.000441095	2.27897	AT5G11950	0.0282544
BnaA02g13510D	0.000441744	2.5077	AT1G68000	0.0282544
BnaC09g04440D	0.000441756	2.91497	AT5G24400	0.0282544
BnaA06g14770D	0.000442709	8.38827	AT1G20910	0.0282927
BnaC05g25190D	0.000443527	7.73006	AT1G31300	0.0283224
BnaA02g19040D	0.000444056	2.89129	AT1G78810	0.0283336
BnaA03g52920D	0.00044484	6.58153	AT4G34588	0.0283594
BnaA10g00450D	0.000445169	7.64212	AT1G01500	0.0283594
BnaA04g29090D	0.000448349	1.63403	AT2G35040	0.0284125
BnaC05g36520D	0.000448356	7.71618	AT3G16810	0.0284125
BnaC02g39850D	0.000448359	4.07422	AT5G27760	0.0284125
BnaCnng16640D	0.000448434	2.17163	AT5G54400	0.0284125
BnaA08g09200D	0.000448867	6.796	AT4G19500	0.0284125
BnaA09g54510D	0.000449014	2.08258	AT1G25422	0.0284125
BnaC03g62180D	0.000449082	13.9867	AT4G23630	0.0284125
BnaC04g08320D	0.00044932	9.38538	AT2G36930	0.0284125
BnaA05g16570D	0.000449354	2.58153	/	0.0284125
BnaA09g12550D	0.000449621	3.55082	AT1G63250	0.0284125
BnaCnng23940D	0.000450157	2.00125	AT5G61020	0.0284125
BnaC01g07710D	0.00045026	4.11835	AT4G30650	0.0284125
BnaC03g59530D	0.000451213	5.98054	AT1G29952	0.0284342
BnaA05g19630D	0.000451313	5.95505	AT3G21560	0.0284342
BnaC02g33380D	0.000453369	2.61784	AT5G47620	0.0285222
BnaC08g22800D	0.000453423	14.9623	AT3G51390	0.0285222
BnaCnng10840D	0.000455605	2.08605	AT3G20390	0.0286369
BnaA09g32650D	0.000456321	2.5897	AT3G52180	0.0286391
BnaCnng63980D	0.000456355	3.68599	AT1G52190	0.0286391
BnaA03g25240D	0.000456731	6.10418	AT4G12600	0.0286403
BnaA03g31390D	0.000457212	1.66021	AT4G30660	0.028648
BnaC08g07950D	0.000458081	11.7848	AT5G35620	0.0286733
BnaAnng39000D	0.000458331	-4.79348	AT3G01300	0.0286733
BnaAnng09830D	0.000460988	-7.15047	/	0.028812
BnaC02g26490D	0.000461268	2.67423	AT4G03180	0.028812
BnaA03g08500D	0.000461965	2.73047	AT5G22360	0.028833
BnaA02g05990D	0.000462558	3.8945	AT5G22860	0.0288402
BnaC05g25600D	0.000462801	1.86625	AT2G47800	0.0288402
BnaC08g35880D	0.000463868	5.27796	AT2G21270	0.0288842
BnaA07g26450D	0.00046459	4.09464	AT1G65030	0.0289067
BnaC04g38420D	0.000465586	7.70853	AT2G27190	0.0289453
BnaA05g02440D	0.000465933	-5.25373	AT2G41810	0.0289453
BnaC02g10240D	0.000467124	2.42212	AT5G59180	0.0289968
BnaA08g12080D	0.000468076	-2.83888	AT3G26560	0.0290065
BnaA09g54810D	0.000468358	4.86272	AT3G55010	0.0290065
BnaC04g29970D	0.000468516	8.37377	AT5G36290	0.0290065
BnaA06g29520D	0.00046873	7.72177	AT5G49400	0.0290065
BnaA05g20090D	0.000470294	4.3422	AT3G20820	0.0290809
BnaAnng26830D	0.000470804	-3.78197	/	0.0290899
BnaA06g40930D	0.000472725	6.86478	AT4G38270	0.0291861
BnaCnng17380D	0.000473507	3.42775	AT4G39740	0.0292119
BnaAnng03100D	0.000473976	9.3174	AT3G06180	0.0292183
BnaC09g03170D	0.000475438	2.94364	AT5G27460	0.0292859
BnaC03g58280D	0.000476899	10.8335	AT1G28110	0.0293379
BnaCnng41360D	0.000477015	11.5729	AT1G31817	0.0293379
BnaCnng78040D	0.000478632	2.68443	AT4G01883	0.0294147
BnaC01g01990D	0.000479609	3.28474	AT4G37240	0.0294522
BnaA05g14980D	0.000480028	6.33795	AT1G52300	0.0294553
BnaA09g22840D	0.000481048	3.76036	AT4G09680	0.0294953
BnaA06g14020D	0.000481416	1.66322	AT5G57740	0.0294953
BnaA04g16130D	0.00048237	2.91278	AT2G27920	0.0295312
BnaC02g33360D	0.000483651	2.14686	AT5G47570	0.0295734
BnaC07g39880D	0.000483945	4.00273	AT4G25730	0.0295734
BnaC04g54470D	0.000484168	5.1918	AT2G29540	0.0295734
BnaC08g13450D	0.000484946	14.9823	AT1G08410	0.0295842
BnaC02g47300D	0.000485084	2.65745	AT5G46030	0.0295842
BnaC01g24590D	0.000486943	3.48278	/	0.029675
BnaA07g25180D	0.000488362	5.31187	AT1G64980	0.0297388
BnaA08g08130D	0.000489608	13.5785	AT4G16845	0.0297812
BnaA06g13840D	0.000489801	5.18086	AT1G19690	0.0297812
BnaA07g20330D	0.00049233	4.37161	AT1G79490	0.0299122
BnaC02g33440D	0.000494291	2.55701	AT5G47670	0.0300056
BnaC02g14910D	0.000494616	3.24264	/	0.0300056
BnaC04g20870D	0.000498119	7.09416	AT3G63170	0.0301842
BnaA03g30440D	0.000498314	-2.92527	AT3G10020	0.0301842
BnaA02g13330D	0.000501124	8.49737	AT1G43580	0.0303107
BnaA07g07170D	0.00050116	3.85915	AT1G53380	0.0303107
BnaC03g63420D	0.000502076	8.25134	AT4G19830	0.0303432
BnaC01g02520D	0.000502781	5.70778	AT2G18020	0.0303629
BnaC07g07890D	0.000504121	8.17682	AT3G23620	0.0304209
BnaC03g51290D	0.000505218	5.54528	AT5G62960	0.0304641
BnaA02g36490D	0.000506525	3.2395	AT4G00750	0.03052
BnaC07g30530D	0.000508252	-2.10539	AT5G23870	0.030601
BnaC02g34790D	0.000510833	2.5553	AT2G02800	0.0307332
BnaC08g13260D	0.000511758	2.44548	AT4G29000	0.0307658
BnaA08g16530D	0.000515964	6.38923	AT4G39390	0.0309729
BnaAnng05780D	0.000515977	7.85989	AT5G45775	0.0309729
BnaA08g08720D	0.00051941	-9.12911	AT4G18340	0.0311464
BnaA06g32910D	0.000519736	3.96857	AT3G26420	0.0311464
BnaC06g10400D	0.000520034	1.52995	AT1G54010	0.0311464
BnaAnng37030D	0.000522098	2.6478	AT1G76490	0.0312467
BnaC07g46660D	0.000522653	6.83853	AT4G37640	0.0312565
BnaC07g47330D	0.000523657	3.92717	AT4G39210	0.0312932
BnaC05g37780D	0.0005242	3.51035	AT3G15460	0.0313023
BnaA06g14490D	0.000526675	10.4903	AT1G20580	0.031387
BnaA03g40370D	0.000526698	-1.16287	AT5G61590	0.031387
BnaC07g31420D	0.000526794	6.53984	AT5G61660	0.031387
BnaC04g17710D	0.000527227	5.02711	AT5G43020	0.0313894
BnaC02g47480D	0.000530245	3.53892	AT5G45190	0.0315267
BnaC02g04920D	0.00053032	1.03962	AT5G13650	0.0315267
BnaC05g10830D	0.00053326	2.42674	AT1G14630	0.0316765
BnaC01g12080D	0.000533632	7.68493	AT4G20360	0.0316765
BnaA03g23430D	0.000536309	7.7124	AT5G50320	0.031792
BnaA04g05740D	0.00053711	7.64885	AT3G52110	0.031792
BnaC08g26140D	0.000537204	7.62766	AT3G55360	0.031792
BnaC07g00480D	0.000537286	6.00778	AT2G20420	0.031792
BnaC08g28200D	0.000537617	6.76794	AT3G57280	0.031792
BnaC03g16770D	0.000537959	-1.14025	AT2G30270	0.031792
BnaC02g13580D	0.000539719	3.00861	AT5G54660	0.0318725
BnaC07g41300D	0.000542815	9.81614	AT4G28450	0.0320317
BnaA10g17210D	0.000543401	2.42048	AT5G17520	0.0320427
BnaC07g00830D	0.000543981	5.59337	AT2G20060	0.0320533
BnaC03g64930D	0.000545004	-2.87735	AT4G12560	0.0320899
BnaCnng26360D	0.000550103	1.53338	/	0.0323336
BnaC07g38450D	0.000550128	1.82768	AT5G17970	0.0323336
BnaC02g07010D	0.000550385	1.52219	AT5G17070	0.0323336
BnaA04g19980D	0.000550758	-4.12803	AT2G34140	0.0323336
BnaC02g29270D	0.000551696	1.98406	AT4G10150	0.0323649
BnaA02g14930D	0.000552479	1.71354	AT1G70505	0.0323871
BnaA09g22500D	0.000553628	6.3001	AT4G10480	0.0324308
BnaA06g25440D	0.000554751	6.22461	AT2G17980	0.0324728
BnaC05g29540D	0.000555907	3.76116	AT3G22930	0.0325167
BnaC02g32440D	0.00055759	6.10297	AT3G18295	0.0325913
BnaC02g41560D	0.000559632	2.88869	AT5G23740	0.0326869
BnaC06g37940D	0.000560919	-2.29663	AT1G77210	0.0327233
BnaA06g13890D	0.000561074	5.8594	AT1G19720	0.0327233
BnaA08g02370D	0.000562346	-4.94888	AT1G49840	0.0327736
BnaA10g24550D	0.000563038	-2.73447	AT5G05965	0.0327901
BnaC05g16820D	0.000563477	-1.77417	AT1G21540	0.0327918
BnaC09g01400D	0.000565311	2.00351	AT3G27280	0.0328339
BnaC08g26280D	0.000565374	5.08555	AT2G22050	0.0328339
BnaC05g16340D	0.000565431	6.35274	AT1G21090	0.0328339
BnaA05g20110D	0.000566378	7.70724	AT3G20800	0.0328479
BnaC09g43800D	0.000566491	6.15739	AT5G13280	0.0328479
BnaA07g10390D	0.000566967	3.41978	AT1G22550	0.0328517
BnaA07g00410D	0.000568661	2.05823	AT2G20570	0.032899
BnaA02g35900D	0.000568931	2.63232	AT1G75180	0.032899
BnaA06g04690D	0.000569016	9.2012	AT1G08260	0.032899
BnaA06g40660D	0.000571063	2.58041	AT4G39330	0.0329935
BnaA02g13310D	0.000571869	2.07317	AT1G67730	0.0330163
BnaC01g05800D	0.000574889	4.61139	AT4G32660	0.0331574
BnaC01g04160D	0.000575334	3.29476	AT4G34230	0.0331574
BnaCnng61940D	0.000575556	4.95404	AT4G31805	0.0331574
BnaA06g23070D	0.000576168	2.33046	AT5G63940	0.0331688
BnaCnng18860D	0.000577773	-5.78681	AT4G17330	0.0332373
BnaCnng60070D	0.000579012	-2.34775	AT1G75160	0.0332847
BnaC02g07090D	0.000579935	1.5295	AT5G17220	0.0333138
BnaA07g24980D	0.000580354	3.66107	AT1G67500	0.033314
BnaUnng00270D	0.000582544	11.1851	AT4G10320	0.0334065
BnaCnng36390D	0.000583365	2.79774	AT5G07580	0.0334065
BnaA08g08220D	0.000583404	-2.25116	AT4G17085	0.0334065
BnaA02g14490D	0.000583895	2.78957	AT1G69700	0.0334065
BnaC05g35250D	0.000584052	7.17909	AT1G60180	0.0334065
BnaA06g28870D	0.00058503	4.12678	AT5G27330	0.0334211
BnaA09g08870D	0.000585142	3.8811	AT2G16770	0.0334211
BnaC05g13900D	0.000586289	9.58531	AT5G35130	0.0334628
BnaA07g24600D	0.000587681	6.26084	AT1G68530	0.0334993
BnaA04g11280D	0.000588148	5.24558	AT5G41670	0.0334993
BnaC02g11430D	0.000588825	2.63325	AT5G57580	0.0334993
BnaA09g29910D	0.000589277	5.20224	AT1G23750	0.0334993
BnaC01g04670D	0.000589298	5.35228	AT4G33520	0.0334993
BnaA09g23220D	0.000589679	1.4938	AT3G27060	0.0334993
BnaC08g30530D	0.000589858	5.99931	AT3G60320	0.0334993
BnaC02g26210D	0.000593349	-2.21335	AT3G47090	0.0336501
BnaC05g12890D	0.000593372	2.53561	AT1G16880	0.0336501
BnaC09g04310D	0.000593912	5.29069	AT5G24710	0.0336501
BnaC03g74690D	0.000594348	11.9517	AT3G45090	0.0336501
BnaA09g06270D	0.000594613	3.31532	AT5G62890	0.0336501
BnaA04g18010D	0.000595884	4.73939	AT2G31060	0.0336982
BnaC07g46510D	0.000597134	5.78877	AT4G37450	0.0337309
BnaA08g11760D	0.00059781	5.47563	AT4G33865	0.0337309
BnaA08g12750D	0.000598268	-2.27417	AT4G30993	0.0337309
BnaCnng56330D	0.000598873	-8.301	AT3G24610	0.0337309
BnaC02g29760D	0.000598992	2.73383	AT5G42150	0.0337309
BnaC02g13740D	0.000598994	3.0265	AT1G65440	0.0337309
BnaC09g17460D	0.000599411	-3.09033	AT5G43300	0.0337309
BnaA04g08210D	0.000601017	-1.77708	AT5G37690	0.033754
BnaC02g09040D	0.000601189	1.02052	AT5G19820	0.033754
BnaC09g33690D	0.000601213	10.441	AT5G58240	0.033754
BnaC04g04680D	0.000601508	12.6393	AT2G45980	0.033754
BnaA06g14430D	0.000602702	2.81418	AT1G20480	0.0337973
BnaCnng67600D	0.00060346	8.96507	AT1G52300	0.0338162
BnaA02g15550D	0.000604388	2.97198	/	0.0338314
BnaA03g15190D	0.000604578	5.71036	AT2G32930	0.0338314
BnaA09g20150D	0.000605953	6.45202	AT4G04910	0.0338847
BnaC03g59980D	0.000608906	10.2059	AT4G38380	0.0340261
BnaA08g08070D	0.000611121	4.66072	AT1G31070	0.0341238
BnaC08g02620D	0.000611508	3.71404	AT1G49600	0.0341238
BnaC02g40840D	0.000616918	3.41756	AT5G25170	0.0344018
BnaA07g31190D	0.000617812	8.52468	AT1G74030	0.0344276
BnaC03g61270D	0.000621286	5.1106	AT4G37750	0.0345972
BnaCnng48150D	0.000622012	9.74149	AT1G56350	0.0346007
BnaC03g66470D	0.000622603	2.65309	AT4G33610	0.0346007
BnaA06g14990D	0.000622788	6.02507	AT1G21200	0.0346007
BnaA06g25400D	0.000623078	2.88973	AT2G18020	0.0346007
BnaA05g19300D	0.000625989	-1.91469	AT5G50960	0.0347383
BnaA02g25820D	0.000626451	-3.4138	AT2G01620	0.0347399
BnaA02g13630D	0.000630189	3.34271	AT2G25710	0.034923
BnaAnng11330D	0.000631365	0.967389	AT1G30470	0.0349639
BnaC08g02650D	0.000633175	2.54418	AT1G19880	0.0350399
BnaC03g36250D	0.000636333	6.14261	AT3G09190	0.0351904
BnaA03g28810D	0.000637434	2.18092	AT3G04830	0.0352269
BnaC02g48760D	0.000640288	2.96871	AT5G24500	0.0353563
BnaC08g20190D	0.000640658	2.77863	AT1G27420	0.0353563
BnaC05g48990D	0.000641336	3.57431	AT1G04660	0.0353694
BnaC07g30840D	0.000643274	5.64078	AT5G23395	0.0354443
BnaA08g11060D	0.00064358	9.65089	AT4G34640	0.0354443
BnaA08g13650D	0.000644746	3.98197	AT4G28550	0.035484
BnaC07g46670D	0.000646604	9.92994	AT4G37650	0.0355384
BnaC01g17530D	0.000646807	3.23098	/	0.0355384
BnaC01g22670D	0.000647064	1.51972	AT2G45550	0.0355384
BnaC02g06710D	0.000648057	1.15051	AT5G60790	0.0355464
BnaC03g66690D	0.000648097	4.15417	AT4G33270	0.0355464
BnaA09g30270D	0.000648656	12.9254	AT1G22920	0.0355526
BnaA09g36860D	0.000650351	6.25065	AT3G57550	0.0356212
BnaC01g27610D	0.000650856	-3.64587	AT1G57990	0.0356245
BnaAnng14700D	0.000652264	-4.05219	AT1G14350	0.0356639
BnaCnng14430D	0.000652467	-6.20266	AT1G08650	0.0356639
BnaC04g28370D	0.00065478	9.68143	AT3G52180	0.0357659
BnaC07g23920D	0.000655537	1.44065	AT3G26820	0.0357829
BnaC05g04630D	0.000656609	7.47996	AT1G06720	0.0357941
BnaC08g15900D	0.000656637	15.419	AT3G04120	0.0357941
BnaA09g30000D	0.000657261	6.30088	AT1G23260	0.0358037
BnaCnng21480D	0.000658766	13.8285	/	0.0358613
BnaC07g01890D	0.000660448	3.75668	AT2G19410	0.0359064
BnaA01g04510D	0.000660612	5.81005	AT4G32530	0.0359064
BnaC08g36020D	0.00066094	7.82402	AT2G21120	0.0359064
BnaA05g29430D	0.000661615	1.30007	AT3G08770	0.0359145
BnaC07g07670D	0.000662118	-3.39058	/	0.0359145
BnaA10g25150D	0.000662732	4.52139	AT5G05240	0.0359145
BnaC02g26300D	0.000662923	2.81912	AT4G12570	0.0359145
BnaC08g10420D	0.00066333	5.83178	AT4G15770	0.0359145
BnaC05g35550D	0.000665541	7.59052	AT3G17920	0.0360098
BnaA02g33430D	0.000666778	8.02558	AT5G62500	0.0360237
BnaC03g61730D	0.000666959	13.0903	AT4G37210	0.0360237
BnaC03g76570D	0.000667147	4.96991	AT4G37770	0.0360237
BnaC08g16790D	0.000667838	4.856	AT1G15820	0.0360367
BnaA09g34620D	0.000668465	-2.95009	AT5G62810	0.0360463
BnaA03g46140D	0.000669499	3.78925	AT4G23650	0.0360777
BnaC03g27860D	0.000670148	-1.56634	AT5G50700	0.0360786
BnaC09g04020D	0.000670417	3.33271	AT5G25380	0.0360786
BnaA03g29630D	0.000673045	3.2927	AT5G27905	0.0361957
BnaA02g17380D	0.00067425	3.22751	/	0.0362343
BnaC02g32740D	0.000674698	3.61938	AT5G46800	0.0362343
BnaC04g17820D	0.000675121	4.28467	AT5G42720	0.0362343
BnaC05g09110D	0.000681552	11.7161	AT1G13060	0.036555
BnaC02g34330D	0.000683225	7.98107	AT2G02080	0.0366202
BnaC03g67370D	0.000685357	12.5218	AT4G31810	0.0366846
BnaCnng46900D	0.000685479	12.8364	AT3G54250	0.0366846
BnaC04g22010D	0.0006858	9.66327	AT3G60750	0.0366846
BnaC09g13710D	0.000687119	-3.8609	AT5G05680	0.0367306
BnaC03g62880D	0.000688854	-3.71065	AT4G18830	0.0367988
BnaA02g16070D	0.000689854	2.37311	AT1G72700	0.0368276
BnaC07g16060D	0.000690585	6.87516	AT5G67280	0.0368421
BnaA02g33310D	0.000692663	-13.4494	AT5G62200	0.0369283
BnaC05g35340D	0.000694293	8.33441	AT3G18140	0.0369821
BnaA03g44500D	0.000694596	4.89775	AT4G20270	0.0369821
BnaC05g16210D	0.00069557	13.8501	AT1G20910	0.0370094
BnaA07g26200D	0.000696158	3.97254	AT1G67040	0.0370161
BnaC02g08720D	0.000696669	1.43864	AT5G19450	0.0370162
BnaC08g28260D	0.000697084	4.17282	AT3G57340	0.0370162
BnaC05g38930D	0.000698879	2.72405	AT3G15220	0.0370869
BnaC05g18000D	0.000699351	13.2422	AT1G22730	0.0370874
BnaUnng03450D	0.000700654	1.77016	AT3G30460	0.0371147
BnaC01g26310D	0.000701177	8.58899	AT3G49850	0.0371147
BnaA07g29860D	0.000701342	5.85308	AT1G72090	0.0371147
BnaA08g20710D	0.000701721	8.1123	AT1G22950	0.0371147
BnaA02g17120D	0.000702577	3.29357	AT1G75080	0.0371205
BnaC05g18740D	0.000703195	7.20721	AT1G23410	0.0371205
BnaC03g68260D	0.000703441	-4.07349	AT4G29830	0.0371205
BnaC02g31930D	0.000703683	1.68702	AT5G45930	0.0371205
BnaA07g29760D	0.000705583	3.36983	AT1G71960	0.0371962
BnaA09g21660D	0.000706245	4.09948	AT4G11420	0.0372066
BnaA07g25850D	0.0007072	3.74256	AT1G66430	0.0372324
BnaA10g14200D	0.000708024	5.27452	AT5G22140	0.0372513
BnaAnng09940D	0.000710658	8.49414	AT5G44320	0.0373653
BnaC04g45770D	0.000711638	-2.98652	AT2G38240	0.0373733
BnaA06g40600D	0.000711743	3.13873	AT4G39480	0.0373733
BnaCnng12330D	0.000716048	-2.19516	AT2G30600	0.0375747
BnaA09g06780D	0.000717767	2.8046	AT5G64290	0.0376402
BnaA02g19260D	0.000718772	2.80796	AT1G79550	0.0376682
BnaA05g28940D	0.000721132	-4.5948	AT3G09520	0.0377672
BnaA07g36420D	0.000721837	2.75468	AT3G23670	0.037773
BnaC02g06160D	0.000722185	1.17661	AT5G15650	0.037773
BnaC02g29100D	0.000724599	2.19267	AT4G10730	0.0378745
BnaC05g00800D	0.000728291	9.77883	AT1G01100	0.0380426
BnaA09g22410D	0.000729422	4.73348	AT4G10710	0.0380769
BnaA06g37370D	0.00073098	3.99207	AT4G38630	0.0381179
BnaC02g12970D	0.000731161	2.09402	AT5G55560	0.0381179
BnaA06g13640D	0.000733843	7.359	AT1G19370	0.0382329
BnaCnng49290D	0.000734616	5.95866	AT4G25450	0.0382483
BnaC06g06210D	0.000735448	-4.90222	AT1G53210	0.0382667
BnaA07g37140D	0.000736217	3.65859	AT1G25510	0.0382818
BnaA02g26030D	0.000736919	3.61153	AT2G05080	0.0382935
BnaC07g23370D	0.000737481	-3.38896	AT3G26165	0.0382978
BnaC03g63650D	0.000739034	7.08575	AT4G20040	0.0383536
BnaAnng26580D	0.000740933	3.10479	AT5G61510	0.0383957
BnaC08g35040D	0.000741505	6.97266	AT2G22480	0.0383957
BnaC02g37280D	0.00074164	4.49946	AT5G13930	0.0383957
BnaA09g16540D	0.000741763	4.32112	AT5G43460	0.0383957
BnaA07g18350D	0.000743168	2.04574	AT3G59400	0.0384352
BnaA08g13280D	0.000743487	5.58547	AT4G29920	0.0384352
BnaC05g11110D	0.000744706	2.55088	AT1G80130	0.0384537
BnaC07g40700D	0.00074533	1.95353	AT4G26590	0.0384537
BnaCnng43190D	0.00074534	9.6708	AT1G03530	0.0384537
BnaC04g05640D	0.000745764	-1.40674	AT2G39770	0.0384537
BnaA06g36570D	0.000746554	-4.07797	AT5G43770	0.0384696
BnaC02g47010D	0.000748326	4.49086	/	0.0385361
BnaC08g32230D	0.000755702	-1.41851	AT5G03970	0.0388817
BnaA06g26860D	0.00075625	10.9684	AT5G24320	0.0388817
BnaCnng17780D	0.000756494	5.57679	AT1G30240	0.0388817
BnaC05g30130D	0.000757932	4.31642	AT1G74060	0.0389087
BnaA01g13220D	0.000758211	5.1389	AT4G23540	0.0389087
BnaC03g55780D	0.000758477	3.10936	AT3G46160	0.0389087
BnaC02g33110D	0.000760118	4.50901	AT5G47090	0.038955
BnaC04g04870D	0.000760352	9.63474	AT2G40290	0.038955
BnaA06g03080D	0.000763292	7.58566	AT1G49760	0.0390807
BnaA02g14000D	0.000763786	0.717319	AT1G68790	0.039081
BnaC05g14090D	0.000767706	2.47869	AT1G18370	0.0392525
BnaA03g15900D	0.000768119	4.85334	AT2G34570	0.0392525
BnaC07g48250D	0.000770824	-3.25666	AT2G27670	0.039343
BnaA02g35840D	0.00077162	2.3276	AT1G70180	0.039343
BnaC08g49060D	0.000771783	6.83667	AT2G25320	0.039343
BnaA07g24130D	0.000772228	7.76117	AT1G66580	0.039343
BnaC08g21470D	0.000772346	4.65278	AT3G49900	0.039343
BnaA03g49870D	0.000773219	5.69959	AT4G29905	0.0393624
BnaAnng36740D	0.000773745	2.37407	AT1G21720	0.0393642
BnaA03g27800D	0.000776722	3.00594	AT3G02230	0.0394835
BnaC07g01780D	0.000777078	8.82369	AT2G19480	0.0394835
BnaC02g12720D	0.000778031	1.8679	AT5G55940	0.0395069
BnaA08g14500D	0.000780059	1.3693	AT4G25300	0.0395848
BnaA02g17850D	0.000781169	1.80096	AT1G76900	0.0395955
BnaC05g36910D	0.000781259	9.97287	AT5G17530	0.0395955
BnaC04g25190D	0.000782362	10.6048	AT1G79920	0.0396263
BnaC03g21400D	0.000783424	5.83744	AT2G38560	0.0396398
BnaA02g16170D	0.000783618	2.53954	AT1G72810	0.0396398
BnaC08g39730D	0.000784401	3.40167	AT1G14260	0.0396484
BnaC09g47740D	0.000784779	4.72482	AT5G08180	0.0396484
BnaA09g03850D	0.000785498	2.58029	AT3G05490	0.039659
BnaA05g36600D	0.00078606	1.84182	AT3G21230	0.039659
BnaA10g15270D	0.000786475	3.67388	AT5G19930	0.039659
BnaC08g05950D	0.000789785	11.5985	AT1G78300	0.0398009
BnaA09g52920D	0.000791861	2.05236	AT2G19170	0.0398673
BnaC07g26130D	0.000792098	9.47136	AT3G30841	0.0398673
BnaCnng34700D	0.0007937	8.11694	AT5G45670	0.0399228
BnaCnng47330D	0.00079641	-2.2921	AT4G34131	0.040034
BnaA07g26100D	0.000798003	3.4975	AT5G46450	0.0400846
BnaA02g19070D	0.000798417	2.30401	AT1G78870	0.0400846
BnaC03g35870D	0.000800248	14.3583	AT3G09680	0.040143
BnaA08g04440D	0.00080091	-11.8265	AT1G44100	0.040143
BnaC06g41920D	0.000801086	3.2433	AT1G53645	0.040143
BnaC05g34300D	0.000804054	4.72838	AT3G18780	0.0402549
BnaA09g08900D	0.000804325	3.46292	AT2G16800	0.0402549
BnaC03g21050D	0.000807017	1.90025	AT2G38090	0.0403645
BnaA05g35030D	0.000810329	2.44076	AT2G32920	0.0405048
BnaC02g39500D	0.000811755	2.83913	AT3G04920	0.0405508
BnaC02g13590D	0.000814998	1.78374	AT5G54630	0.0406874
BnaA09g27540D	0.000816121	3.98218	AT1G28110	0.0407181
BnaC08g09980D	0.000818294	9.74582	AT4G15000	0.0408011
BnaA07g20960D	0.000819773	1.35893	AT1G77530	0.0408397
BnaC05g32480D	0.000820089	11.7786	AT3G20050	0.0408397
BnaC08g26070D	0.000823111	-1.84688	AT3G55240	0.0409116
BnaC02g06200D	0.000823157	1.2986	AT5G15700	0.0409116
BnaC08g06650D	0.000823475	13.2262	AT1G36050	0.0409116
BnaA02g18710D	0.000823575	3.41405	AT1G78050	0.0409116
BnaC02g41810D	0.00082511	3.04679	AT5G60830	0.0409624
BnaC08g09090D	0.000826903	13.5012	AT1G31360	0.041026
BnaC05g14180D	0.000828579	12.8519	AT1G18500	0.0410836
BnaC03g67300D	0.000832171	9.7534	AT4G32440	0.0412362
BnaA05g29600D	0.000833404	4.91121	AT3G08630	0.0412718
BnaC09g02170D	0.000833958	3.53433	AT3G30180	0.0412737
BnaA01g32380D	0.000837926	8.45683	AT3G07290	0.0414445
BnaA08g09560D	0.000839444	5.19473	AT4G20890	0.041448
BnaA06g32880D	0.000839532	1.72615	AT3G26490	0.041448
BnaAnng26160D	0.00083955	2.46985	AT4G25760	0.041448
BnaC04g29520D	0.000840133	10.1137	AT4G12790	0.0414512
BnaCnng44010D	0.000840913	5.97979	AT5G41970	0.0414642
BnaA01g09520D	0.00084404	4.52059	AT4G18700	0.0415927
BnaC07g47040D	0.000845781	11.0259	AT1G62020	0.0416405
BnaC04g29990D	0.00084605	8.42551	AT5G36740	0.0416405
BnaC01g44580D	0.000849577	2.55604	AT3G16240	0.0417884
BnaA09g34880D	0.000851725	-2.38078	AT3G55240	0.0418684
BnaA02g13000D	0.000853509	2.81327	AT1G67250	0.0418987
BnaA06g40730D	0.000853786	3.33225	AT4G39210	0.0418987
BnaC09g01310D	0.000853912	2.49334	AT3G27020	0.0418987
BnaA09g50370D	0.000856736	10.3228	AT1G05205	0.0419869
BnaA04g03250D	0.000856757	2.34831	AT3G56100	0.0419869
BnaC01g22810D	0.000858258	5.74147	AT4G14770	0.0420328
BnaA01g21390D	0.000858744	-5.96093	AT1G54840	0.0420328
BnaA05g23860D	0.000861546	-1.58532	AT3G15670	0.0421442
BnaA02g14630D	0.0008623	2.12786	AT1G69230	0.042152
BnaC07g00780D	0.000862758	-2.81382	AT2G20180	0.042152
BnaC02g04470D	0.000865057	4.11245	AT5G13020	0.0422385
BnaC02g12070D	0.000865897	3.74574	AT5G56710	0.0422538
BnaCnng56720D	0.000867672	3.87423	AT5G26950	0.042311
BnaC05g15960D	0.000868127	4.35218	/	0.042311
BnaA04g07280D	0.000868956	3.52654	AT4G12740	0.0423257
BnaAnng15090D	0.00087091	7.36618	AT5G64420	0.0423772
BnaCnng65550D	0.000871149	2.53218	AT4G10120	0.0423772
BnaC07g08020D	0.000871601	9.69866	AT2G07050	0.0423772
BnaA05g22110D	0.000872356	-3.47239	AT3G18110	0.0423843
BnaC02g27730D	0.000872806	3.44112	AT4G01100	0.0423843
BnaA01g15350D	0.000874808	3.631	AT4G26150	0.042442
BnaC02g41520D	0.000875054	4.12586	AT5G23940	0.042442
BnaA06g04320D	0.000877284	1.4569	AT1G07660	0.0425194
BnaA06g23980D	0.000878105	1.21511	/	0.0425194
BnaC03g56270D	0.000878342	3.66523	AT3G46990	0.0425194
BnaC04g34870D	0.000878774	5.87197	AT2G36380	0.0425194
BnaA06g07580D	0.000880212	7.62415	AT1G13170	0.0425633
BnaC04g31750D	0.000882077	4.73032	AT3G29020	0.0426195
BnaA03g31520D	0.00088292	1.13856	AT2G24700	0.0426195
BnaC07g02170D	0.000882973	6.92634	AT2G19260	0.0426195
BnaC08g36210D	0.000884738	7.19591	AT2G20760	0.042679
BnaA09g38240D	0.000885703	3.29245	AT3G59990	0.0426998
BnaA07g28660D	0.000886521	2.63211	AT1G70140	0.0427136
BnaA03g56170D	0.000891894	7.27274	AT5G20360	0.04294
BnaCnng38520D	0.000893042	2.52702	AT5G43300	0.04294
BnaA10g24180D	0.000893345	-1.58568	AT5G06760	0.04294
BnaC03g63240D	0.000893365	14.4034	AT4G19500	0.04294
BnaC08g03490D	0.000894845	5.45759	AT1G48610	0.0429512
BnaC03g20240D	0.000894887	4.25084	AT2G36570	0.0429512
BnaC05g24540D	0.000895207	5.41492	AT1G32400	0.0429512
BnaA09g39160D	0.000895893	4.33155	AT3G61415	0.0429583
BnaC05g22120D	0.000896963	10.8736	AT1G29150	0.0429839
BnaC09g01350D	0.000898473	2.39156	AT3G27160	0.0430166
BnaA08g04920D	0.000898719	15.7856	AT4G13010	0.0430166
BnaC03g32470D	0.000899462	12.283	AT3G01510	0.0430264
BnaC03g69380D	0.000900805	-3.22882	AT1G53100	0.0430502
BnaA09g53990D	0.000901034	3.20196	AT1G32100	0.0430502
BnaC03g55640D	0.000902504	2.87923	AT5G59910	0.0430779
BnaA09g09520D	0.000902689	4.57833	AT2G18170	0.0430779
BnaA05g19950D	0.000904938	1.97001	AT3G21100	0.0431594
BnaA02g12250D	0.000906097	0.855152	AT1G65720	0.043189
BnaCnng27350D	0.000906708	9.29697	AT1G10950	0.0431924
BnaC04g55530D	0.00091161	8.91198	AT3G56150	0.043355
BnaC02g34490D	0.000911883	2.47841	AT2G02400	0.043355
BnaC05g15750D	0.000912084	11.2814	AT1G20410	0.043355
BnaC06g34220D	0.000912391	2.11306	/	0.043355
BnaA09g34030D	0.00091333	9.14128	AT3G54110	0.043355
BnaCnng36400D	0.000913369	7.82555	AT5G07590	0.043355
BnaC03g41250D	0.000916269	-3.13189	AT3G19930	0.0434669
BnaC08g16270D	0.000917264	7.65418	AT1G14670	0.0434685
BnaCnng42440D	0.00091739	-3.71343	AT5G54330	0.0434685
BnaC07g49510D	0.000918611	9.74163	AT5G26110	0.0434768
BnaA07g03150D	0.000918649	7.67142	AT2G17130	0.0434768
BnaC03g31480D	0.000919805	6.84857	AT4G01575	0.0434998
BnaC07g07610D	0.000920505	5.38614	AT1G31660	0.0434998
BnaA08g17680D	0.000920766	5.12874	AT1G29820	0.0434998
BnaA09g29800D	0.000922285	4.30213	AT1G24095	0.0435459
BnaC03g67150D	0.000923779	14.753	AT4G32272	0.0435674
BnaC05g36500D	0.00092397	7.64703	AT3G16850	0.0435674
BnaC03g33480D	0.000924742	4.72455	AT3G03600	0.0435674
BnaC01g04470D	0.000924916	4.34594	AT4G33780	0.0435674
BnaA06g24900D	0.000925478	7.91505	AT5G67630	0.0435682
BnaA09g39610D	0.000926585	3.76528	AT3G62030	0.0435947
BnaA10g01280D	0.00092764	1.50397	AT1G02640	0.0436187
BnaC05g31540D	0.000929537	2.47025	AT3G59020	0.0436822
BnaC08g24540D	0.000932757	-1.46573	AT3G53510	0.0438072
BnaC04g22270D	0.000933289	3.12697	/	0.0438072
BnaCnng31330D	0.000934014	0.829704	AT5G28937	0.0438155
BnaC04g39470D	0.000935769	2.49772	/	0.0438366
BnaC01g18160D	0.000936187	8.24959	/	0.0438366
BnaC09g02350D	0.000938006	7.38932	AT5G48385	0.0438366
BnaC07g03810D	0.00093805	8.71233	AT2G18020	0.0438366
BnaC02g12860D	0.000938168	1.73363	AT5G55670	0.0438366
BnaA09g27070D	0.000938255	4.83073	AT1G29050	0.0438366
BnaA08g14220D	0.000938297	4.85787	AT4G26970	0.0438366
BnaA10g03200D	0.000939751	5.14182	AT1G05170	0.0438783
BnaCnng05430D	0.000940285	3.62346	AT2G33560	0.0438783
BnaA08g28260D	0.000942111	7.19717	AT1G05470	0.0439379
BnaCnng31210D	0.000942912	4.2061	/	0.0439497
BnaC01g03050D	0.000944117	3.2272	AT4G35550	0.0439802
BnaC02g05460D	0.000945752	1.05221	AT4G17700	0.0440268
BnaC05g15350D	0.000946217	4.14434	AT1G19770	0.0440268
BnaAnng33110D	0.000946817	-6.06607	AT1G78940	0.0440292
BnaA06g36500D	0.000948103	4.7581	AT5G43870	0.0440634
BnaA10g17720D	0.000950643	5.435	AT5G16750	0.0441409
BnaC05g40710D	0.000951249	3.35118	AT3G12390	0.0441409
BnaA03g06870D	0.000951635	4.59938	AT5G18070	0.0441409
BnaC05g17340D	0.000951975	3.1044	AT1G22030	0.0441409
BnaAnng21500D	0.000954924	2.36959	AT5G27990	0.044252
BnaC04g52660D	0.000956016	8.1494	AT3G58840	0.044277
BnaC08g35120D	0.000957814	4.15078	AT2G22425	0.0443065
BnaC02g13520D	0.000958246	1.72214	AT5G54830	0.0443065
BnaA03g14220D	0.000958314	6.64346	AT2G31010	0.0443065
BnaA06g28940D	0.000962201	12.0584	AT3G05040	0.0444358
BnaA08g26790D	0.000962219	9.33604	AT1G08780	0.0444358
BnaCnng37180D	0.000962886	4.60967	/	0.0444409
BnaC08g46920D	0.000963551	1.45181	AT4G13340	0.044446
BnaA09g55010D	0.00096535	8.82659	AT3G54960	0.0445034
BnaC07g42560D	0.000966926	5.6017	AT4G30350	0.0445504
BnaC03g20610D	0.000968107	4.59737	AT2G37230	0.0445791
BnaA01g08390D	0.000970295	3.13778	AT4G28490	0.0446542
BnaA09g36340D	0.000973253	5.48643	AT3G56990	0.0447286
BnaC03g36380D	0.000973937	10.0656	AT3G08840	0.0447286
BnaC09g09390D	0.000974714	3.38295	AT2G17500	0.0447286
BnaA10g15220D	0.000975074	2.13749	AT5G20190	0.0447286
BnaA03g53010D	0.000975138	5.25709	AT4G34710	0.0447286
BnaA02g18590D	0.000975264	1.7189	/	0.0447286
BnaA03g32100D	0.000980617	-2.29523	AT3G12012	0.0449131
BnaA02g14760D	0.000981341	1.70508	AT1G70160	0.0449131
BnaC02g12760D	0.000981432	1.77989	AT5G55910	0.0449131
BnaC09g14150D	0.000981771	-1.71629	AT3G26160	0.0449131
BnaC02g34430D	0.000982238	2.96916	AT2G02370	0.0449131
BnaA05g36110D	0.000982651	7.14263	AT3G20430	0.0449131
BnaC05g29840D	0.000988127	11.1847	AT3G22660	0.0451266
BnaCnng14700D	0.000988449	8.70272	AT4G13150	0.0451266
BnaA10g01360D	0.000991227	3.1909	AT1G02730	0.0452108
BnaC05g36120D	0.000991423	4.23704	AT3G17260	0.0452108
BnaA02g20120D	0.000992464	3.75783	AT1G64790	0.0452325
BnaA09g33670D	0.000994574	1.31443	AT3G53370	0.0452374
BnaA09g28490D	0.00099473	5.74213	AT1G25380	0.0452374
BnaA09g09480D	0.000995215	4.06585	AT2G18090	0.0452374
BnaA06g39820D	0.000995744	3.49811	AT2G03690	0.0452374
BnaC08g46780D	0.000996587	10.1825	AT4G13940	0.0452374
BnaA09g32360D	0.000997275	3.54915	AT3G51800	0.0452374
BnaA05g21350D	0.000997543	5.3352	AT3G18780	0.0452374
BnaC02g09000D	0.000997619	0.91048	AT5G19770	0.0452374
BnaC02g12200D	0.000998984	1.83756	AT5G56510	0.0452374
BnaC09g47630D	0.000999181	3.07559	AT5G08280	0.0452374
BnaA02g32040D	0.000999427	8.95805	/	0.0452374
BnaCnng39770D	0.00100013	12.1778	AT5G58020	0.0452374
BnaA08g13190D	0.00100119	7.09039	AT4G30160	0.0452374
BnaA10g14650D	0.00100127	9.85378	AT5G20920	0.0452374
BnaC05g15840D	0.00100155	2.83566	AT1G20530	0.0452374
BnaC02g08730D	0.00100161	1.95154	AT5G19485	0.0452374
BnaC09g27800D	0.00100366	-2.81147	AT1G65481	0.0452754
BnaC02g07120D	0.00100416	1.39555	AT5G17230	0.0452754
BnaC07g10310D	0.00100486	-15.5771	/	0.0452754
BnaA10g18080D	0.00100609	8.22478	AT5G16240	0.0452754
BnaA02g15720D	0.00100622	1.69067	AT1G72020	0.0452754
BnaC01g04190D	0.00100639	3.25562	AT4G34200	0.0452754
BnaC04g12470D	0.00100641	4.30662	AT2G32300	0.0452754
BnaC02g48640D	0.00100852	5.61115	AT5G25490	0.0453449
BnaC02g06970D	0.00101141	1.72828	AT5G17010	0.045441
BnaA07g37280D	0.00101228	6.45645	AT1G21380	0.045441
BnaA05g14720D	0.00101236	6.81156	AT1G53050	0.045441
BnaA07g19350D	0.00101407	8.16533	AT3G62630	0.0454921
BnaC04g15760D	0.00101478	11.3492	AT2G28450	0.0454986
BnaA09g30390D	0.00101567	6.03846	AT1G22770	0.045513
BnaC09g01160D	0.0010172	1.08546	AT3G26740	0.045549
BnaA02g17230D	0.00101761	2.42455	AT1G75460	0.045549
BnaC02g26880D	0.00101844	2.52913	AT4G02820	0.0455605
BnaC07g09110D	0.00102031	9.83088	AT1G05540	0.0455654
BnaA02g02830D	0.00102073	-2.59979	AT5G15830	0.0455654
BnaC02g06700D	0.00102074	1.44115	AT5G16590	0.0455654
BnaA08g31650D	0.00102082	3.04832	AT1G11680	0.0455654
BnaC02g34840D	0.00102293	2.53001	AT2G02860	0.0456257
BnaA02g27990D	0.00102331	2.00575	AT5G54780	0.0456257
BnaC09g01250D	0.00102477	2.3163	AT3G26935	0.0456652
BnaCnng46630D	0.00102858	4.95799	AT3G14000	0.0457839
BnaC02g04870D	0.00102909	1.15729	AT5G13590	0.0457839
BnaA08g02000D	0.00102915	7.95432	AT1G51060	0.0457839
BnaA05g33260D	0.00102989	3.33134	AT3G02870	0.0457912
BnaA08g06000D	0.00103046	12.6126	AT4G16360	0.0457912
BnaA01g18480D	0.00103276	4.72579	AT3G21540	0.0458443
BnaC02g04960D	0.00103292	1.45979	AT5G13720	0.0458443
BnaC02g46900D	0.00103351	2.93852	AT5G47390	0.0458443
BnaA03g08790D	0.00103437	3.24995	AT5G60800	0.0458443
BnaC02g10060D	0.00103483	1.47137	AT5G59310	0.0458443
BnaCnng12060D	0.00103511	4.90648	AT3G48150	0.0458443
BnaA08g05670D	0.00103566	14.0847	AT4G15420	0.0458443
BnaA09g12650D	0.00103749	3.97851	AT1G63140	0.0458873
BnaC08g47920D	0.00103777	9.29538	AT4G16630	0.0458873
BnaC02g23210D	0.00104136	1.92034	AT1G80290	0.0460204
BnaCnng10940D	0.00104264	8.21402	AT1G31070	0.0460241
BnaA08g06970D	0.00104357	-2.17083	AT1G32170	0.0460241
BnaC02g13260D	0.0010438	9.28948	AT5G55160	0.0460241
BnaC07g20630D	0.00104417	6.0695	AT2G01220	0.0460241
BnaCnng48170D	0.00104432	10.0362	AT5G35930	0.0460241
BnaC04g32400D	0.001045	7.2432	AT5G40880	0.046029
BnaA07g01450D	0.00104761	6.92032	AT2G19385	0.0460963
BnaC01g05670D	0.00104836	5.16599	AT4G32720	0.0460963
BnaA06g23850D	0.00104905	7.25929	AT5G64930	0.0460963
BnaA08g14900D	0.00105014	2.95579	AT4G35720	0.0460963
BnaC02g42330D	0.00105086	3.17088	AT5G62865	0.0460963
BnaA10g02770D	0.00105116	12.227	AT1G04630	0.0460963
BnaC07g07750D	0.00105122	-1.09532	/	0.0460963
BnaC05g15710D	0.00105203	2.90594	AT5G03250	0.0460963
BnaC02g47680D	0.00105226	2.34861	AT2G02100	0.0460963
BnaC02g34400D	0.00105229	1.90589	AT2G02180	0.0460963
BnaC03g75530D	0.00105305	-1.74149	AT1G14610	0.0461046
BnaA08g05370D	0.00105692	-3.6904	AT1G70530	0.0462487
BnaA02g30790D	0.00105885	3.27437	/	0.0462559
BnaA08g28900D	0.00105924	-0.975215	AT1G07180	0.0462559
BnaA02g35820D	0.00105958	7.71852	AT1G69070	0.0462559
BnaC07g19710D	0.00105977	4.40652	AT5G46930	0.0462559
BnaC08g18200D	0.00105998	6.29932	AT1G18670	0.0462559
BnaA09g06250D	0.00106208	2.97411	AT5G62850	0.0463227
BnaC08g05850D	0.00106357	3.71697	/	0.0463621
BnaA09g22530D	0.00107282	3.90456	AT4G10450	0.0467402
BnaCnng39980D	0.00107516	2.66756	AT4G37080	0.0467932
BnaCnng71750D	0.0010756	1.09872	AT5G13660	0.0467932
BnaC02g47740D	0.00107579	3.13954	AT2G01730	0.0467932
BnaA01g29170D	0.00107829	13.0805	AT3G14800	0.0468764
BnaA07g00320D	0.00107904	6.98692	AT2G20470	0.0468836
BnaC09g36340D	0.00108348	10.4906	AT5G22740	0.047051
BnaC09g43560D	0.00108518	5.4511	AT5G13520	0.0470993
BnaC04g03930D	0.00108695	9.20916	AT2G45030	0.0471251
BnaC03g58020D	0.00108696	12.7289	AT1G27630	0.0471251
BnaA04g01140D	0.00108755	3.30454	AT3G60720	0.0471256
BnaC05g09550D	0.00108907	4.37182	AT1G72860	0.0471607
BnaC09g41570D	0.00108954	2.32371	AT5G16250	0.0471607
BnaA03g02910D	0.00109183	4.74164	AT5G44050	0.0472231
BnaCnng09280D	0.00109216	2.24653	/	0.0472231
BnaC04g17720D	0.00109449	5.1868	AT5G43020	0.0472983
BnaC05g35580D	0.0010953	7.11584	AT3G17910	0.0473075
BnaC08g02120D	0.00109686	13.3583	AT1G07360	0.0473389
BnaA06g24010D	0.00109721	1.682	AT5G64980	0.0473389
BnaA08g01510D	0.00109878	-10.6678	AT1G52310	0.0473811
BnaCnng26910D	0.00110088	14.5441	AT1G20260	0.0474462
BnaC09g25430D	0.00110211	11.4225	AT4G08790	0.0474736
BnaC03g33200D	0.00110361	1.43814	AT4G16080	0.0475033
BnaC04g45880D	0.00110398	5.57594	AT2G38720	0.0475033
BnaA08g19190D	0.00110535	-6.30571	AT1G24620	0.0475366
BnaA05g10140D	0.00110665	2.85915	AT2G33430	0.047567
BnaC05g04930D	0.00110768	6.09238	AT1G07140	0.0475803
BnaC06g05980D	0.00110824	2.30973	AT5G66750	0.0475803
BnaC08g01350D	0.00110874	8.07228	AT1G05620	0.0475803
BnaA08g02650D	0.00111002	12.1519	AT1G49480	0.0476095
BnaA10g03070D	0.00111066	4.77736	AT1G04930	0.0476115
BnaC07g31130D	0.00111252	-4.44972	AT5G61260	0.0476656
BnaA04g17650D	0.00111527	-2.56009	AT3G09160	0.0477548
BnaC02g06950D	0.00111579	1.86637	AT5G16930	0.0477548
BnaC02g42300D	0.00111782	6.07108	AT5G62820	0.047816
BnaA08g01240D	0.00111903	-3.25878	AT1G53250	0.0478424
BnaCnng19590D	0.00112173	5.52506	AT5G57800	0.047932
BnaA07g25380D	0.00112244	3.40908	AT1G65700	0.0479368
BnaC08g35620D	0.00112422	5.13197	AT2G21510	0.0479871
BnaA03g47930D	0.00112651	-2.37802	AT4G26300	0.0480593
BnaC06g16790D	0.00112773	6.31587	AT3G58660	0.0480604
BnaA06g20160D	0.00112773	8.62275	AT3G43590	0.0480604
BnaA07g38270D	0.00113104	6.22328	AT1G80080	0.0481758
BnaCnng30540D	0.00113284	-3.08603	AT2G18960	0.0482268
BnaC07g27700D	0.00113509	7.00111	AT5G27120	0.0482762
BnaA06g07180D	0.00113521	3.30224	AT1G11545	0.0482762
BnaA02g22060D	0.00113599	-0.98128	AT4G28300	0.0482822
BnaC07g32490D	0.00113656	-2.68335	AT3G51750	0.0482822
BnaC03g61750D	0.00113804	4.06201	AT4G37240	0.0483195
BnaC08g31510D	0.00113881	12.0858	AT3G61650	0.0483266
BnaA10g29810D	0.00113951	2.31996	AT5G13750	0.0483307
BnaC02g27520D	0.00114078	1.88316	AT4G00560	0.0483591
BnaCnng36080D	0.00114187	3.0178	AT5G65560	0.0483692
BnaC02g23170D	0.00114223	2.01735	AT1G80350	0.0483692
BnaC09g48270D	0.00114332	1.643	/	0.0483901
BnaAnng21690D	0.00114398	7.52253	AT1G27430	0.0483923
BnaC03g62910D	0.00114832	-5.71488	AT4G18900	0.0485132
BnaC03g26110D	0.00114922	6.60511	AT2G47710	0.0485132
BnaC03g63410D	0.00115031	3.90611	AT4G19840	0.0485132
BnaA09g07020D	0.00115077	3.20673	AT5G64813	0.0485132
BnaC08g05020D	0.0011509	1.87109	/	0.0485132
BnaA03g49270D	0.00115107	6.81891	AT4G28450	0.0485132
BnaA08g17010D	0.00115157	7.93703	AT4G38600	0.0485132
BnaCnng61350D	0.00115222	1.86175	AT4G10080	0.0485132
BnaA09g32860D	0.00115229	2.55153	AT3G52430	0.0485132
BnaA08g16010D	0.00115545	5.68573	AT4G38100	0.0486101
BnaA04g07300D	0.00115581	6.35007	AT4G12650	0.0486101
BnaA09g53660D	0.00115752	8.89486	AT2G03120	0.0486565
BnaA03g33160D	0.0011588	7.80936	AT3G13920	0.0486848
BnaC08g21790D	0.00115956	7.14525	AT5G62520	0.0486913
BnaC06g15260D	0.00116172	9.9861	AT3G54470	0.0487445
BnaCnng21450D	0.00116205	-6.90868	AT3G63180	0.0487445
BnaA08g02470D	0.00116361	-7.02299	AT1G49670	0.0487845
BnaC03g07630D	0.00116575	3.09003	AT5G08580	0.0488441
BnaC08g11360D	0.00116625	2.53611	/	0.0488441
BnaC02g06410D	0.00116727	1.13436	AT5G16120	0.0488612
BnaC02g39780D	0.00117001	3.38134	AT5G27620	0.0489505
BnaA06g33300D	0.00117258	2.68869	AT3G25860	0.0489661
BnaC03g71510D	0.00117271	2.12365	AT1G71720	0.0489661
BnaC03g63340D	0.00117332	6.92109	AT4G19870	0.0489661
BnaC05g35870D	0.00117378	3.7724	AT3G17680	0.0489661
BnaC03g26800D	0.00117398	4.14847	AT3G22260	0.0489661
BnaC02g35210D	0.00117499	2.46781	AT2G03800	0.0489661
BnaC08g16710D	0.00117503	6.29952	AT1G15500	0.0489661
BnaC08g13270D	0.00117538	3.32099	AT4G29010	0.0489661
BnaCnng50050D	0.00117602	1.72593	AT3G13180	0.0489661
BnaA09g32350D	0.0011765	5.04694	AT3G51790	0.0489661
BnaC09g00910D	0.00117802	1.2304	AT4G03210	0.0489959
BnaA09g53240D	0.00117854	7.98972	AT1G60850	0.0489959
BnaC03g19860D	0.00117937	-0.415205	AT2G36000	0.0489959
BnaC09g54360D	0.00117967	8.20119	AT5G60710	0.0489959
BnaC09g20880D	0.00118028	4.15181	AT2G01913	0.0489959
BnaA09g32430D	0.00118242	7.06406	AT3G51940	0.0490593
BnaAnng33520D	0.00118509	3.46912	AT1G50240	0.0491448
BnaA07g14570D	0.00118582	6.24218	AT5G38830	0.0491495
BnaC03g36260D	0.00119034	7.26374	AT3G09010	0.0493114
BnaC08g35890D	0.00119624	5.27329	AT2G21250	0.0495065
BnaC02g08470D	0.00119629	1.18458	AT5G19110	0.0495065
BnaA06g11340D	0.00119695	2.95768	AT1G16870	0.0495083
BnaC09g02300D	0.00120213	3.80241	AT5G48230	0.0496969
BnaC04g33060D	0.00120308	9.16899	AT5G41190	0.0497106
BnaC02g46570D	0.00120564	2.33608	AT1G80600	0.0497906

## Sheet: ST6
Table S6. Summary of TWAS-significant genes for erucic acid at 20 DAF
Gene	Lmm_p	Lr_beta	Tair	FDR
BnaA08g11870D	7.28624e-28	4.40717	AT4G33210	5.55472e-23
BnaA08g10900D	1.27487e-27	-6.008	/	5.55472e-23
BnaC03g77060D	4.9851e-27	5.04805	AT3G42050	1.44804e-22
BnaA08g11190D	6.71656e-26	-9.89071	AT4G34430	1.46324e-21
BnaC03g77050D	1.66345e-22	-6.68082	AT2G27960	2.89913e-18
BnaA08g10170D	9.04353e-22	-5.7895	AT4G22220	1.31345e-17
BnaA08g11470D	1.11865e-20	10.2933	AT4G33680	1.39259e-16
BnaA08g30680D	5.08915e-20	6.07096	AT4G32272	5.54349e-16
BnaA08g10160D	3.38026e-19	-11.8707	AT4G22140	3.22198e-15
BnaA08g12140D	3.69739e-19	3.32263	AT4G32570	3.22198e-15
BnaA08g12360D	7.22725e-19	-7.28905	AT4G31770	5.72542e-15
BnaA08g12100D	1.17243e-17	-7.45926	AT4G32680	8.51397e-14
BnaA08g11940D	2.61911e-17	5.40916	AT4G33040	1.75565e-13
BnaA08g12030D	3.26133e-17	7.54167	AT4G32760	2.02999e-13
BnaA08g11910D	9.07583e-17	-5.9657	AT4G33090	5.27257e-13
BnaA07g12180D	4.67104e-16	-6.14774	AT5G67020	2.54402e-12
BnaA08g11770D	4.44793e-15	14.087	AT4G33430	2.28001e-11
BnaA08g11040D	3.57336e-14	-15.0078	AT4G34670	1.72994e-10
BnaA08g10220D	4.27021e-14	-12.5988	AT4G22360	1.9585e-10
BnaA08g30590D	8.72117e-14	-7.27192	AT4G02890	3.7999e-10
BnaA08g10230D	1.21443e-13	-15.0971	AT4G12590	4.90517e-10
BnaA08g09980D	1.23837e-13	-7.07966	AT4G20940	4.90517e-10
BnaA08g11650D	1.93182e-13	6.22255	AT4G34030	7.31925e-10
BnaA08g12250D	3.63255e-13	-5.72058	AT4G32300	1.31895e-09
BnaC03g66650D	1.20376e-12	7.58739	AT1G29880	4.19592e-09
BnaA08g10000D	1.91301e-12	4.68615	AT4G21710	6.41168e-09
BnaA08g10050D	3.10929e-12	-4.46339	AT4G21865	1.00352e-08
BnaA08g12180D	4.69741e-12	9.66031	AT4G32520	1.46193e-08
BnaC01g01300D	6.43621e-12	-4.5783	/	1.93401e-08
BnaA08g08530D	7.32088e-12	-9.27542	AT4G18040	2.12652e-08
BnaA08g10290D	1.01424e-11	-2.79311	AT1G11580	2.85108e-08
BnaA08g12110D	1.133e-11	-8.61722	AT4G32680	3.08537e-08
BnaA08g11360D	1.97726e-11	5.09978	AT4G34150	5.22129e-08
BnaA08g12120D	2.39668e-11	9.03442	AT4G32610	6.1427e-08
BnaAnng08820D	4.01091e-11	2.32823	AT4G13950	9.98625e-08
BnaA08g11060D	4.26668e-11	-11.9924	AT4G34640	1.0328e-07
BnaA08g09120D	5.21036e-11	-8.44207	AT4G19185	1.22714e-07
BnaA08g30700D	7.52365e-11	-4.14894	AT4G31610	1.72533e-07
BnaA08g11590D	9.211e-11	-8.60163	AT4G34120	2.05812e-07
BnaA08g11680D	9.57207e-11	-7.0981	AT4G33985	2.08532e-07
BnaC03g29980D	1.1708e-10	-3.77371	AT3G17900	2.48843e-07
BnaA08g08200D	2.03671e-10	-4.91975	AT4G17070	4.22578e-07
BnaUnng05100D	2.98727e-10	-3.62112	/	6.05387e-07
BnaA08g11170D	3.94914e-10	-13.0348	AT4G34450	7.82128e-07
BnaCnng77270D	5.00348e-10	3.4767	/	9.68918e-07
BnaA08g11860D	8.17099e-10	-5.66438	AT4G33220	1.5479e-06
BnaC03g66460D	8.43493e-10	-9.25559	AT4G33630	1.56391e-06
BnaA08g09790D	9.25368e-10	-6.27933	AT4G21160	1.67997e-06
BnaC03g77030D	1.04925e-09	-4.48899	AT4G34200	1.86599e-06
BnaA08g08380D	1.21272e-09	-6.63911	AT4G17650	2.11357e-06
BnaA08g12090D	1.2896e-09	5.6205	AT3G26560	2.2035e-06
BnaC03g66720D	2.02763e-09	-6.84258	AT4G33220	3.39791e-06
BnaC02g33150D	2.35074e-09	-1.88203	AT3G01910	3.86507e-06
BnaA08g12500D	2.64616e-09	3.04398	AT4G31400	4.27022e-06
BnaC02g33280D	4.01683e-09	-2.54439	AT5G47200	6.36426e-06
BnaA09g05380D	4.28083e-09	-4.26051	AT5G23300	6.66143e-06
BnaA08g30290D	4.89698e-09	-5.53955	AT4G17300	7.48654e-06
BnaA08g12080D	5.29153e-09	5.55546	AT3G26560	7.95025e-06
BnaC02g42050D	5.52716e-09	-4.63316	AT5G61170	8.04736e-06
BnaC03g66990D	5.54086e-09	-1.48066	AT2G12480	8.04736e-06
BnaC03g64990D	7.23248e-09	-5.10668	AT2G04305	1.0332e-05
BnaA08g09990D	7.49514e-09	-6.44723	AT4G20930	1.05345e-05
BnaA08g11640D	7.6248e-09	8.90703	AT4G34050	1.05467e-05
BnaC03g66730D	9.097e-09	-9.74155	AT4G33210	1.23864e-05
BnaA08g12150D	9.7008e-09	7.74201	AT4G32551	1.30053e-05
BnaC02g42150D	1.44018e-08	-4.29276	/	1.90152e-05
BnaA03g18950D	1.68632e-08	-3.4936	/	2.19327e-05
BnaC02g46620D	1.75568e-08	-2.30555	AT1G80780	2.2499e-05
BnaC08g46770D	2.15617e-08	-11.7259	AT4G13950	2.72309e-05
BnaA08g12590D	2.22418e-08	3.12059	AT3G48110	2.76885e-05
BnaC03g66230D	2.69278e-08	3.87103	AT4G34290	3.30499e-05
BnaC02g33510D	2.73453e-08	-2.49892	AT4G15950	3.30962e-05
BnaA08g10920D	3.15586e-08	-9.80583	AT4G35040	3.76723e-05
BnaCnng57390D	3.40773e-08	-3.52642	AT5G47770	4.01293e-05
BnaA08g08270D	3.46668e-08	-10.0284	AT4G17390	4.02792e-05
BnaC02g33660D	3.60229e-08	-2.00275	AT2G01140	4.13041e-05
BnaC03g66660D	4.07104e-08	8.27005	AT1G29880	4.60725e-05
BnaC02g33120D	4.38301e-08	-2.57897	AT5G47100	4.89672e-05
BnaC02g29130D	4.95103e-08	-2.1729	AT4G10450	5.4033e-05
BnaC02g33360D	4.96045e-08	-1.48724	AT5G47570	5.4033e-05
BnaC02g33290D	5.2974e-08	-2.02714	AT5G47210	5.68985e-05
BnaC05g16650D	5.3541e-08	5.17489	AT1G21390	5.68985e-05
BnaC02g33900D	6.013e-08	-2.57265	AT2G01320	6.31307e-05
BnaA08g09800D	6.35136e-08	-3.8565	/	6.58893e-05
BnaC02g32060D	6.89208e-08	-2.12947	AT5G46020	7.06576e-05
BnaC02g33460D	7.91978e-08	-2.26463	AT5G47690	8.02495e-05
BnaA08g10460D	9.11224e-08	-9.9757	AT4G22740	9.12711e-05
BnaC02g33860D	9.33239e-08	-2.74662	AT2G01270	9.2414e-05
BnaC02g23080D	9.72831e-08	-2.33584	AT5G51280	9.52522e-05
BnaA02g16420D	9.84986e-08	-3.84012	AT1G73380	9.53707e-05
BnaC02g33420D	1.00069e-07	-2.61985	AT5G47660	9.58267e-05
BnaA09g05200D	1.02299e-07	-4.44466	AT5G23630	9.68969e-05
BnaA08g30710D	1.12427e-07	-8.3331	AT4G31700	0.000105345
BnaA08g08120D	1.17608e-07	-7.73222	AT4G16800	0.000109027
BnaCnng39430D	1.32385e-07	-2.6344	AT2G02910	0.000120767
BnaAnng31110D	1.33043e-07	-7.53747	AT4G18710	0.000120767
BnaA08g11740D	1.52384e-07	6.64568	AT4G33920	0.000136898
BnaC02g41820D	1.65235e-07	-3.97427	AT5G60850	0.000146928
BnaC02g27270D	1.80429e-07	-2.11993	AT4G02730	0.000158817
BnaC02g33480D	1.85509e-07	-2.89537	AT5G47730	0.000161656
BnaA08g09020D	2.01972e-07	-6.61809	AT4G19100	0.00017426
BnaA09g34620D	2.12983e-07	3.09937	AT5G62810	0.000181959
BnaC09g05320D	2.16799e-07	3.60265	AT3G29410	0.000183421
BnaC02g34220D	2.21287e-07	-1.61845	AT2G01970	0.000185417
BnaA08g08370D	2.24673e-07	-4.87066	AT4G17570	0.000186462
BnaC03g77130D	2.3318e-07	-1.24184	AT4G33985	0.000191696
BnaA09g05840D	2.40345e-07	-4.57865	AT5G62000	0.00019574
BnaCnng08350D	2.45574e-07	-2.55509	AT4G11440	0.000198147
BnaC03g60130D	2.60373e-07	-5.84568	AT4G38690	0.00020816
BnaA09g04730D	2.9622e-07	10.9739	AT5G10740	0.000234666
BnaC02g33110D	3.32682e-07	-2.37836	AT5G47090	0.000259027
BnaC02g33760D	3.32917e-07	-2.02144	AT2G01250	0.000259027
BnaA08g09100D	3.38263e-07	-6.20504	AT4G19160	0.000260858
BnaA08g07200D	3.48845e-07	4.47057	AT5G35170	0.000266659
BnaA08g12450D	3.5624e-07	-4.23432	AT4G31480	0.000269943
BnaCnng60070D	3.74636e-07	2.66935	AT1G75160	0.000281436
BnaC02g29610D	3.83382e-07	-1.34645	AT5G42650	0.000285544
BnaA02g15680D	3.93212e-07	-3.37599	AT1G71950	0.000290384
BnaA08g12550D	3.97401e-07	-9.16226	AT4G31300	0.000291011
BnaC02g31570D	4.16599e-07	-1.5518	AT5G45410	0.000302527
BnaC02g31010D	4.40802e-07	-2.04792	AT1G10230	0.000317458
BnaC02g33380D	4.76017e-07	-2.18006	AT5G47620	0.000336602
BnaA08g10700D	4.76322e-07	-13.9593	AT4G35260	0.000336602
BnaC02g46800D	4.78972e-07	-2.10391	AT4G10330	0.000336602
BnaA02g12020D	4.91594e-07	-3.85974	AT1G65260	0.000341426
BnaA08g11390D	4.93673e-07	-3.31572	AT4G34135	0.000341426
BnaAnng09900D	5.03825e-07	-2.828	/	0.000344336
BnaC04g06110D	5.09735e-07	-4.73602	AT2G39470	0.000344336
BnaC04g06020D	5.09735e-07	-4.73602	AT2G39470	0.000344336
BnaA09g06240D	5.152e-07	-6.04998	AT5G62810	0.000344846
BnaC02g39530D	5.18404e-07	-1.97149	AT5G27970	0.000344846
BnaA08g03420D	5.33464e-07	-6.36042	/	0.000352175
BnaC02g47720D	5.39851e-07	-1.90575	AT2G01710	0.000353712
BnaC02g31750D	5.51085e-07	-2.02211	AT5G45750	0.000356065
BnaC02g35210D	5.51614e-07	-1.97041	AT2G03800	0.000356065
BnaC02g28050D	5.64543e-07	-3.81038	AT4G02130	0.000361731
BnaA08g09130D	6.02862e-07	-4.98408	AT4G19191	0.000383464
BnaA08g08210D	6.8066e-07	-8.14561	AT4G17080	0.000429812
BnaA02g12350D	6.89325e-07	-2.12556	AT1G66080	0.000432152
BnaC02g46900D	7.18098e-07	-2.31449	AT5G47390	0.000446975
BnaC02g29720D	7.50773e-07	-1.66517	AT1G43170	0.000463999
BnaC02g26300D	7.98203e-07	-2.78413	AT4G12570	0.000489838
BnaA02g35840D	8.43743e-07	-1.56924	AT1G70180	0.000514164
BnaC02g30680D	8.79279e-07	-1.62491	AT5G43950	0.000532098
BnaA08g08790D	8.86969e-07	-7.75448	AT1G36280	0.00053305
BnaA06g14020D	8.99979e-07	-2.56397	AT5G57740	0.000533888
BnaA08g08330D	9.00616e-07	-7.33814	AT4G17520	0.000533888
BnaC02g29100D	9.48066e-07	-1.63018	AT4G10730	0.000558219
BnaA08g12680D	9.5496e-07	-11.5404	AT4G31130	0.000558504
BnaC02g29260D	9.86455e-07	-2.41643	AT2G29550	0.000568922
BnaC03g60140D	9.94851e-07	-12.2409	AT4G38710	0.000568922
BnaC02g32110D	9.96206e-07	-2.7751	AT5G46170	0.000568922
BnaC02g29290D	9.98887e-07	-2.60154	AT4G10140	0.000568922
BnaA08g09060D	1.00899e-06	-5.87869	AT4G19120	0.000570947
BnaA08g09850D	1.07079e-06	-7.90296	AT4G21090	0.000602003
BnaA08g12610D	1.07932e-06	7.95823	AT4G31270	0.000602909
BnaC02g34200D	1.1136e-06	-2.40654	AT3G08650	0.0006181
BnaC03g61250D	1.14241e-06	5.69269	AT4G37810	0.000630074
BnaC02g33070D	1.18517e-06	-2.67445	AT5G47070	0.00064955
BnaC02g34800D	1.22967e-06	-2.16932	AT2G02810	0.000669089
BnaA08g07170D	1.24003e-06	8.47573	AT5G35100	0.000669089
BnaC08g08950D	1.24386e-06	-2.06036	AT5G47060	0.000669089
BnaA08g10030D	1.26806e-06	-5.87051	AT4G21810	0.00067792
BnaA09g06260D	1.28281e-06	-4.50753	AT3G48050	0.000681623
BnaA08g09730D	1.33679e-06	-8.42228	AT4G21450	0.000706004
BnaCnng61350D	1.34985e-06	-1.58979	AT4G10080	0.000708605
BnaCnng30160D	1.40301e-06	-1.97357	AT5G43320	0.000730431
BnaC02g30000D	1.40819e-06	-2.66919	AT1G63610	0.000730431
BnaC02g47300D	1.41916e-06	-2.33509	AT5G46030	0.000731767
BnaA02g14660D	1.42922e-06	-3.89727	AT1G69250	0.000732616
BnaC02g30730D	1.46046e-06	-4.93465	AT5G43990	0.000743344
BnaC02g30770D	1.46721e-06	-2.8015	AT5G44070	0.000743344
BnaC03g65810D	1.516e-06	-10.8009	AT4G34710	0.000762005
BnaC02g34760D	1.52153e-06	-2.01754	AT2G02760	0.000762005
BnaC02g33830D	1.53764e-06	-2.35403	AT2G01260	0.000765673
BnaC02g30020D	1.56294e-06	-1.67722	AT5G43010	0.000773852
BnaC02g42020D	1.61378e-06	-3.14192	AT5G61140	0.000794507
BnaA09g05160D	1.64354e-06	-3.05418	AT4G39160	0.000804615
BnaCnng65550D	1.66156e-06	-1.99239	AT4G10120	0.000808892
BnaA02g15580D	1.70362e-06	-1.00052	AT2G46960	0.000824759
BnaA09g41970D	1.77542e-06	-2.47248	AT2G23450	0.00085351
BnaA08g12430D	1.7826e-06	6.14338	AT4G31540	0.00085351
BnaC03g66430D	1.82067e-06	-16.4252	AT4G33680	0.000862858
BnaC02g26020D	1.82192e-06	-1.98132	AT1G80860	0.000862858
BnaC02g28900D	1.9543e-06	-2.11176	AT4G11100	0.000920551
BnaC02g42120D	1.98388e-06	-2.12203	AT5G61220	0.000929458
BnaC02g29330D	2.12434e-06	-2.56593	AT2G07180	0.000989944
BnaC02g30280D	2.16316e-06	-1.96016	AT5G43500	0.00100267
BnaC02g32140D	2.28375e-06	-2.42366	AT5G46210	0.00104897
BnaA09g05660D	2.28712e-06	-4.57356	AT5G61330	0.00104897
BnaCnng51050D	2.31554e-06	-1.56504	AT5G44290	0.00105644
BnaC02g18560D	2.39195e-06	-2.66153	AT1G53250	0.00108562
BnaA09g33340D	2.41744e-06	-1.78903	AT3G52990	0.00109076
BnaC02g28720D	2.42831e-06	-2.00217	AT5G42750	0.00109076
BnaC02g27940D	2.45251e-06	-1.69198	AT4G01480	0.00109598
BnaC02g34690D	2.51751e-06	-1.89263	AT2G02560	0.00111929
BnaAnng27600D	2.55374e-06	-6.89914	AT4G16510	0.00112963
BnaA09g05940D	2.57444e-06	-3.99723	AT5G62200	0.00113304
BnaC02g23260D	2.61011e-06	-3.53797	AT1G80190	0.00113966
BnaC02g30440D	2.61564e-06	-1.78683	AT5G43750	0.00113966
BnaA08g04960D	2.66239e-06	2.22627	AT1G77230	0.00115426
BnaC02g31850D	2.69884e-06	-1.74738	AT5G45775	0.00116427
BnaC02g29300D	2.8055e-06	-2.08939	AT4G10120	0.00120432
BnaA08g12640D	2.84162e-06	-3.01229	AT4G31150	0.00121385
BnaC02g33310D	2.86204e-06	-2.90089	AT5G47520	0.00121661
BnaA08g11480D	2.93079e-06	-5.53278	AT4G33670	0.00123978
BnaA08g06560D	3.00083e-06	8.62536	AT1G33980	0.00126328
BnaA02g15650D	3.06985e-06	-0.86486	AT1G71920	0.00128612
BnaA08g09410D	3.10315e-06	-4.11761	AT4G20380	0.00129385
BnaA08g02680D	3.12159e-06	6.67913	AT1G49450	0.00129534
BnaAnng17280D	3.19427e-06	-2.12499	AT5G42960	0.00131922
BnaA08g30400D	3.21407e-06	-3.27479	AT4G20150	0.00132113
BnaC03g60490D	3.24574e-06	-6.5077	AT4G39260	0.00132789
BnaA02g35640D	3.31324e-06	-3.86253	AT1G68730	0.00134917
BnaC02g35270D	3.33906e-06	-2.16298	AT2G03870	0.00135336
BnaCnng78760D	3.36064e-06	3.20013	AT3G50710	0.0013558
BnaC02g30340D	3.47955e-06	-3.08988	AT5G43720	0.0013973
BnaC02g31030D	3.50952e-06	-1.59327	AT5G44340	0.00140287
BnaA08g08360D	3.56784e-06	-9.56599	AT4G17560	0.00141879
BnaAnng27210D	3.5819e-06	-7.70309	AT4G19900	0.00141879
BnaC02g30260D	3.637e-06	-1.65923	AT1G33140	0.00142955
BnaC02g29690D	3.64187e-06	-1.82697	AT3G57790	0.00142955
BnaA02g13350D	3.71348e-06	-2.62855	AT1G67785	0.00145112
BnaCnng26060D	3.75486e-06	4.02896	/	0.00145656
BnaA08g12190D	3.76825e-06	11.6125	AT4G32470	0.00145656
BnaA08g08660D	3.77753e-06	-8.50263	AT4G18240	0.00145656
BnaC03g64530D	3.8237e-06	-3.53341	AT4G21710	0.00146228
BnaA09g06740D	3.82593e-06	-3.48338	AT5G64180	0.00146228
BnaC02g33880D	3.93832e-06	-3.43162	AT2G01290	0.00149866
BnaC02g40780D	3.9657e-06	-1.81361	AT5G25240	0.00150252
BnaA08g14490D	4.21987e-06	5.18475	AT4G26080	0.0015919
BnaC02g35410D	4.30133e-06	-1.78122	AT3G25540	0.00161412
BnaC02g28980D	4.31582e-06	-1.22892	AT4G11010	0.00161412
BnaC07g10310D	4.3868e-06	16.3785	/	0.00163365
BnaC02g39890D	4.5169e-06	-2.06711	AT5G27840	0.00167414
BnaC03g62040D	4.53395e-06	-10.9408	AT4G36130	0.00167414
BnaA02g14760D	4.55617e-06	-2.75594	AT1G70160	0.00167525
BnaAnng22940D	4.69363e-06	-2.50051	AT3G25660	0.00171241
BnaA08g11150D	4.69654e-06	-11.488	AT4G34490	0.00171241
BnaC02g28790D	4.90597e-06	-2.11672	AT5G42820	0.00178132
BnaA08g13660D	4.93012e-06	-4.41739	AT4G28540	0.00178266
BnaC02g47740D	5.06804e-06	-2.40335	AT2G01730	0.00182457
BnaC02g34370D	5.0879e-06	-1.53729	AT2G02160	0.00182457
BnaC02g33250D	5.27904e-06	-2.1748	AT5G47150	0.00187089
BnaA07g14200D	5.29168e-06	-1.533	AT5G37830	0.00187089
BnaC03g77140D	5.31867e-06	-1.1134	AT1G43140	0.00187089
BnaC02g27710D	5.32958e-06	-1.79314	AT4G01150	0.00187089
BnaC02g31730D	5.33705e-06	-1.58681	AT5G45510	0.00187089
BnaA08g10510D	5.3459e-06	-9.34069	AT4G22920	0.00187089
BnaA10g24140D	5.43394e-06	4.57629	AT4G34710	0.0018941
BnaC02g28120D	5.60428e-06	-1.48539	AT4G02290	0.00194456
BnaA08g08550D	5.62334e-06	-8.79226	AT4G18100	0.00194456
BnaC02g41630D	5.66482e-06	-3.48052	AT5G23440	0.00195116
BnaC02g33400D	5.71765e-06	-1.50372	AT5G47640	0.0019616
BnaC03g64540D	5.75254e-06	-4.19788	AT4G21710	0.00196584
BnaA08g30760D	5.85402e-06	-3.82831	AT4G28730	0.00199031
BnaC02g27370D	5.8719e-06	-1.03119	AT4G02400	0.00199031
BnaC02g33270D	5.89268e-06	-3.68054	AT5G47180	0.00199031
BnaC02g33260D	5.97532e-06	-1.52253	AT5G47150	0.00201043
BnaC06g18480D	6.08154e-06	5.40191	/	0.0020383
BnaC02g34840D	6.13828e-06	-1.49187	AT2G02860	0.00204943
BnaA08g07360D	6.19311e-06	-3.70891	AT5G33370	0.00205985
BnaC02g47770D	6.22618e-06	-1.48145	AT2G01820	0.00206297
BnaC02g36340D	6.28628e-06	-1.83103	AT3G26780	0.0020724
BnaC02g29760D	6.3022e-06	-1.7802	AT5G42150	0.0020724
BnaA08g13980D	6.51269e-06	-4.04663	AT4G27900	0.00212824
BnaA09g06220D	6.52085e-06	-3.74195	AT5G62770	0.00212824
BnaC02g34400D	6.9002e-06	-1.68243	AT2G02180	0.00224365
BnaA02g14670D	7.11763e-06	-1.47171	AT1G55750	0.00230574
BnaAnng35740D	7.19543e-06	-1.20092	AT2G01850	0.00232231
BnaCnng54340D	7.34358e-06	-3.5966	AT5G47920	0.00236138
BnaC02g23240D	7.55493e-06	-2.52401	AT1G80260	0.00242041
BnaC02g33640D	7.66392e-06	-1.95258	AT2G01110	0.00244633
BnaAnng19130D	7.74003e-06	-6.6988	AT4G17330	0.00246161
BnaA02g15710D	8.03674e-06	-1.2232	AT1G72010	0.00254668
BnaA09g30040D	8.11017e-06	-3.71513	AT1G23205	0.00256064
BnaA03g49680D	8.23709e-06	1.40238	AT1G14350	0.00259132
BnaA08g11600D	8.34453e-06	-11.513	AT5G11760	0.00261568
BnaAnng19250D	8.42719e-06	6.33138	AT4G37790	0.00263212
BnaC02g26940D	8.56402e-06	-2.42721	AT1G65840	0.00266531
BnaC02g30980D	8.61581e-06	-2.20171	AT3G20480	0.00267188
BnaC03g68360D	8.65809e-06	-6.52653	AT1G49890	0.00267547
BnaCnng22210D	8.80098e-06	-1.54243	AT2G01470	0.00271002
BnaC02g28040D	8.9607e-06	-1.87584	AT4G02120	0.00274948
BnaC02g28870D	9.05239e-06	-3.13028	AT4G11160	0.00276787
BnaCnng60970D	9.13972e-06	-1.36559	AT5G42570	0.0027848
BnaA02g12820D	9.18991e-06	-3.22921	AT1G67080	0.00279034
BnaA02g18940D	9.22334e-06	-3.44713	AT1G78590	0.00279076
BnaA08g11950D	9.25972e-06	5.40052	AT4G33000	0.00279208
BnaC02g31920D	9.45708e-06	-1.80876	AT5G45900	0.00284175
BnaA08g03430D	9.6265e-06	-10.8352	/	0.00288272
BnaC02g27520D	9.93284e-06	-1.50238	AT4G00560	0.00296427
BnaA04g20070D	1.0266e-05	-1.73383	AT2G34260	0.00305324
BnaA08g30220D	1.03102e-05	-11.8251	AT4G17170	0.00305597
BnaA08g08940D	1.03994e-05	-4.97622	AT4G18880	0.00307194
BnaC02g47130D	1.08286e-05	-4.44701	AT5G46110	0.00318793
BnaC02g42030D	1.11827e-05	-3.01597	AT5G61140	0.00328107
BnaC07g02940D	1.12448e-05	3.69047	/	0.00328825
BnaA08g13640D	1.13944e-05	-5.84135	AT4G28600	0.00332083
BnaCnng30150D	1.17136e-05	-1.9	AT4G38680	0.00339972
BnaC02g46860D	1.17692e-05	-2.66758	AT5G47455	0.00339972
BnaC02g28130D	1.17821e-05	-1.62971	AT4G02370	0.00339972
BnaAnng21820D	1.18628e-05	-2.4382	AT4G28360	0.00341171
BnaA09g37450D	1.21104e-05	-4.64749	AT3G58500	0.00347147
BnaC02g26310D	1.2435e-05	-2.30948	AT4G12570	0.00355281
BnaC02g46780D	1.27132e-05	-1.76926	AT3G57150	0.00362043
BnaA08g06750D	1.28226e-05	-3.56011	/	0.0036397
BnaC02g31540D	1.29276e-05	-1.84306	AT5G45330	0.00364599
BnaA08g30180D	1.29284e-05	-4.28657	AT4G14570	0.00364599
BnaC02g28890D	1.3053e-05	-1.62927	AT4G20330	0.00366925
BnaCnng23830D	1.32486e-05	-2.38989	AT4G11790	0.00371225
BnaC02g41860D	1.33467e-05	-3.1539	AT5G60890	0.00372774
BnaCnng39420D	1.39126e-05	-2.46475	AT2G02880	0.0038683
BnaC03g77150D	1.39387e-05	-4.48447	AT4G02570	0.0038683
BnaC02g34060D	1.40047e-05	-1.35394	AT2G01620	0.0038723
BnaC02g33230D	1.40513e-05	-1.26361	AT5G47120	0.0038723
BnaCnng08330D	1.40864e-05	-1.48322	AT4G11420	0.0038723
BnaCnng39410D	1.42932e-05	-1.84339	AT2G02870	0.0039168
BnaC02g34490D	1.43501e-05	-1.65625	AT2G02400	0.00392005
BnaA08g06240D	1.47347e-05	3.23977	/	0.00400003
BnaC05g19240D	1.47347e-05	3.23977	/	0.00400003
BnaC02g47660D	1.48665e-05	-1.61171	AT2G01450	0.00402327
BnaC02g28800D	1.53182e-05	-2.29728	AT5G42820	0.00413269
BnaA02g36270D	1.55667e-05	-1.98183	AT1G80750	0.00418677
BnaA08g11420D	1.57028e-05	-1.96068	AT4G33860	0.004207
BnaC02g29270D	1.57385e-05	-1.78916	AT4G10150	0.004207
BnaA09g05850D	1.58709e-05	-6.52487	AT5G02500	0.00422291
BnaC03g64520D	1.59346e-05	-8.25262	AT4G20930	0.00422291
BnaA08g08350D	1.59434e-05	-6.19395	AT4G17550	0.00422291
BnaC02g23170D	1.60788e-05	-1.79581	AT1G80350	0.00423921
BnaA02g30860D	1.61022e-05	2.45144	/	0.00423921
BnaA06g13840D	1.65667e-05	-2.48664	AT1G19690	0.00434837
BnaC02g39780D	1.6703e-05	-2.78558	AT5G27620	0.00437096
BnaC02g28880D	1.68557e-05	-1.05042	AT4G11150	0.00439773
BnaC02g33100D	1.69739e-05	-2.00722	AT5G47080	0.00440296
BnaA02g14230D	1.70214e-05	-0.250392	AT1G69030	0.00440296
BnaA08g30650D	1.70273e-05	5.04748	AT4G32250	0.00440296
BnaA02g16510D	1.72272e-05	-3.00002	AT1G73650	0.00442417
BnaC07g31180D	1.7275e-05	5.03948	AT5G61340	0.00442417
BnaA02g15550D	1.73105e-05	-2.48719	/	0.00442417
BnaC03g64570D	1.73125e-05	-3.95361	AT4G04890	0.00442417
BnaA02g15050D	1.73811e-05	-2.06651	AT1G70620	0.00442873
BnaC02g46570D	1.74826e-05	-1.71905	AT1G80600	0.00444161
BnaC02g28710D	1.77033e-05	-1.55923	/	0.00447949
BnaA02g13120D	1.77346e-05	-0.374581	AT1G67410	0.00447949
BnaC02g34830D	1.78339e-05	-1.67898	AT2G02850	0.00449156
BnaA08g09340D	1.83502e-05	-6.07749	AT4G19830	0.00460555
BnaCnng54330D	1.83922e-05	-1.6711	AT5G47930	0.00460555
BnaA06g16160D	1.84502e-05	2.89932	AT3G49120	0.00460683
BnaC02g41500D	1.86745e-05	-2.1219	AT5G24030	0.00464952
BnaA08g16800D	1.90568e-05	-2.58958	AT4G34660	0.00472832
BnaC02g36060D	1.90995e-05	-1.69212	AT3G26360	0.00472832
BnaA02g14180D	1.94055e-05	-3.50561	AT1G68920	0.00479047
BnaCnng61340D	1.97235e-05	-2.60772	AT2G07180	0.00483607
BnaA08g30310D	1.97483e-05	-3.67415	AT4G16610	0.00483607
BnaC02g46600D	1.97567e-05	-1.5515	AT1G80830	0.00483607
BnaC02g27290D	2.02239e-05	-2.10017	AT4G02460	0.00493657
BnaC02g39760D	2.04868e-05	-3.04464	AT5G27540	0.00498677
BnaA08g08190D	2.06265e-05	-7.0472	AT4G17060	0.00500679
BnaC08g01470D	2.11537e-05	3.60533	AT1G05700	0.0051205
BnaA08g29440D	2.1709e-05	-7.52714	AT4G14720	0.00523915
BnaC02g32530D	2.17642e-05	-1.88097	AT5G46620	0.00523915
BnaA02g12760D	2.18758e-05	-1.49273	AT1G67040	0.00525151
BnaA08g07270D	2.19864e-05	3.78047	AT5G34850	0.00526357
BnaC02g26880D	2.21654e-05	-1.57684	AT4G02820	0.00529189
BnaC02g28020D	2.25091e-05	-1.75459	AT4G01730	0.00535927
BnaAnng38470D	2.33721e-05	-2.83308	/	0.00554957
BnaCnng52820D	2.34519e-05	-2.58533	AT4G01100	0.00555339
BnaA08g09210D	2.38587e-05	-2.96285	AT4G19500	0.00561922
BnaC02g31300D	2.38589e-05	-1.17594	AT5G45040	0.00561922
BnaA09g06810D	2.43707e-05	2.42895	AT5G64350	0.00572428
BnaA02g12140D	2.55718e-05	-0.756511	AT1G65520	0.00597509
BnaA08g11900D	2.56013e-05	-4.1865	AT4G33100	0.00597509
BnaC02g32900D	2.56442e-05	-2.55364	AT5G46910	0.00597509
BnaC02g33160D	2.63688e-05	-1.49645	AT5G47110	0.00612754
BnaC02g34780D	2.64849e-05	-1.79184	AT2G02790	0.00613816
BnaAnng25040D	2.72466e-05	-0.718006	AT1G27370	0.00624954
BnaC02g27040D	2.73697e-05	-1.39907	AT4G02590	0.00624954
BnaC02g28640D	2.74542e-05	-1.43269	AT4G11970	0.00624954
BnaC09g04590D	2.74967e-05	2.1883	AT3G22290	0.00624954
BnaC02g26540D	2.83998e-05	18.5192	/	0.00624954
BnaC02g26550D	2.83998e-05	18.5192	/	0.00624954
BnaC02g26560D	2.83998e-05	18.5192	/	0.00624954
BnaC02g26570D	2.83998e-05	18.5192	/	0.00624954
BnaC02g26580D	2.83998e-05	18.5192	/	0.00624954
BnaC02g26590D	2.83998e-05	18.5192	/	0.00624954
BnaC02g26600D	2.83998e-05	18.5192	/	0.00624954
BnaC02g26610D	2.83998e-05	18.5192	/	0.00624954
BnaC02g26620D	2.83998e-05	18.5192	/	0.00624954
BnaC02g26630D	2.83998e-05	18.5192	/	0.00624954
BnaC02g26640D	2.83998e-05	18.5192	/	0.00624954
BnaC02g26650D	2.83998e-05	18.5192	/	0.00624954
BnaC02g26660D	2.83998e-05	18.5192	/	0.00624954
BnaC02g26670D	2.83998e-05	18.5192	/	0.00624954
BnaC02g26680D	2.83998e-05	18.5192	/	0.00624954
BnaC02g26690D	2.83998e-05	18.5192	/	0.00624954
BnaA08g13580D	2.96526e-05	-2.146	/	0.00650879
BnaC03g77230D	2.99974e-05	-2.87752	AT4G34100	0.0065591
BnaC02g39800D	3.00502e-05	-1.42402	AT5G27670	0.0065591
BnaC02g33410D	3.01076e-05	-2.08108	AT5G47650	0.0065591
BnaC03g68230D	3.09334e-05	2.55893	AT5G63820	0.00672219
BnaC02g38260D	3.13592e-05	-1.62378	AT5G47830	0.00679778
BnaC04g28540D	3.23704e-05	-1.69013	AT1G65800	0.00699955
BnaC05g11050D	3.24924e-05	-2.19929	AT1G80040	0.00700854
BnaA03g23510D	3.26709e-05	3.85441	AT5G50750	0.00702964
BnaC02g33580D	3.28824e-05	-0.86903	AT2G01100	0.00704817
BnaA04g29080D	3.29187e-05	-2.05356	AT2G35040	0.00704817
BnaA02g12340D	3.30716e-05	-2.51053	AT1G66070	0.00706354
BnaA08g08750D	3.33863e-05	-4.86625	/	0.00711333
BnaC02g27390D	3.36157e-05	-1.91259	AT4G00300	0.00714474
BnaA08g08570D	3.41501e-05	5.12218	/	0.00724065
BnaA02g16450D	3.54544e-05	-2.66378	AT1G73470	0.00749896
BnaC03g66180D	3.62758e-05	2.08472	AT4G34360	0.00765411
BnaC02g39740D	3.74707e-05	-2.63495	AT5G27470	0.00788712
BnaA02g13510D	3.79139e-05	-1.01682	AT1G68000	0.00796118
BnaCnng23940D	3.8128e-05	-1.40669	AT5G61020	0.0079869
BnaCnng52550D	3.93566e-05	-3.0209	/	0.00819884
BnaC02g23210D	3.93667e-05	-1.52305	AT1G80290	0.00819884
BnaA02g33520D	3.9422e-05	3.93082	AT5G62670	0.00819884
BnaC03g65000D	4.05312e-05	-4.87006	AT4G22550	0.00840945
BnaC02g22970D	4.09249e-05	-2.26639	AT2G26000	0.00847097
BnaC02g42360D	4.33926e-05	-2.10979	AT5G62910	0.00896047
BnaC02g35830D	4.34955e-05	-1.62741	AT3G25930	0.00896049
BnaC02g30290D	4.36395e-05	-1.79511	/	0.00896894
BnaA02g36050D	4.41772e-05	-2.59727	AT1G77740	0.0090581
BnaC02g37910D	4.44119e-05	-1.32834	AT3G29320	0.00907161
BnaA08g26940D	4.44976e-05	-1.44753	AT1G08450	0.00907161
BnaA08g09870D	4.45554e-05	-4.88774	/	0.00907161
BnaC07g35670D	4.52283e-05	1.56847	AT4G18990	0.00918714
BnaC02g36250D	4.55393e-05	-2.93539	AT3G26670	0.00922881
BnaC03g07370D	4.68219e-05	1.50453	AT1G28200	0.00946672
BnaA08g02650D	4.80599e-05	-10.4156	AT1G49480	0.00969452
BnaAnng21370D	4.81974e-05	-3.29231	AT1G76010	0.0096998
BnaCnng70910D	4.85796e-05	-1.38458	AT4G11420	0.0097519
BnaA01g23280D	4.87477e-05	3.30153	AT1G07430	0.0097519
BnaA09g06140D	4.8792e-05	3.38453	AT5G62580	0.0097519
BnaC02g28500D	4.91851e-05	-1.67935	AT4G12250	0.00980799
BnaA08g09440D	4.93617e-05	-4.31185	AT4G20420	0.00981975
BnaC02g40790D	4.94695e-05	-1.61565	AT5G25220	0.00981975
BnaC02g36630D	4.9685e-05	-1.81463	AT3G27060	0.00984011
BnaA08g08560D	5.01911e-05	-3.41426	AT4G18150	0.00991638
BnaA08g06980D	5.02977e-05	4.05051	AT1G76065	0.00991638
BnaA07g31540D	5.1457e-05	-1.60378	AT1G74430	0.010122
BnaC08g37350D	5.17133e-05	-4.81007	AT3G17900	0.0101496
BnaC02g30140D	5.2014e-05	-1.30495	AT3G16290	0.0101856
BnaA06g13890D	5.21938e-05	-2.6692	AT1G19720	0.0101925
BnaC02g34010D	5.22829e-05	-1.21385	AT2G01600	0.0101925
BnaA03g31390D	5.2806e-05	-1.28051	AT4G30660	0.0102715
BnaA08g10100D	5.33623e-05	-4.30324	AT5G11250	0.0103566
BnaA02g17850D	5.38608e-05	-1.86961	AT1G76900	0.0104301
BnaA09g29800D	5.44177e-05	-4.46301	AT1G24095	0.0104925
BnaC02g33540D	5.44239e-05	-1.5385	AT2G01080	0.0104925
BnaC02g15040D	5.492e-05	-1.72999	AT5G52520	0.0105437
BnaA02g06490D	5.49314e-05	-6.1542	AT5G60120	0.0105437
BnaA08g08510D	5.52919e-05	-5.78868	AT4G17950	0.0105895
BnaA08g13480D	5.59361e-05	-1.59509	AT4G29260	0.0106894
BnaA08g29910D	5.70552e-05	4.39189	AT2G06520	0.0108794
BnaA02g15150D	5.74433e-05	-0.506614	AT1G70770	0.0109295
BnaC02g30320D	5.77044e-05	-2.36807	AT5G43710	0.0109553
BnaAnng29860D	5.79745e-05	-7.2644	AT4G15410	0.0109826
BnaA02g12050D	5.82158e-05	-0.664096	AT1G65290	0.0110044
BnaC02g42260D	5.89791e-05	2.54113	AT5G62680	0.0111246
BnaC02g27480D	5.95748e-05	-1.84513	AT4G00520	0.0112127
BnaAnng28440D	5.97309e-05	-2.28116	AT5G66920	0.0112178
BnaC02g35840D	5.99216e-05	-1.79244	AT3G25970	0.0112294
BnaCnng49530D	6.08024e-05	-2.26253	AT5G48655	0.0113549
BnaC02g28000D	6.08516e-05	-1.74835	AT4G01590	0.0113549
BnaA02g14000D	6.20744e-05	0.306785	AT1G68790	0.0115536
BnaC02g34080D	6.21818e-05	-2.22196	AT2G01640	0.0115536
BnaC02g12740D	6.26081e-05	-1.7658	AT5G55920	0.0116081
BnaA08g05690D	6.33005e-05	-8.86522	AT4G15470	0.0116661
BnaC03g76260D	6.34475e-05	-5.04762	AT4G39730	0.0116661
BnaA08g12600D	6.34524e-05	3.03544	AT4G31290	0.0116661
BnaC02g39840D	6.34563e-05	-3.27347	AT5G27740	0.0116661
BnaC02g28010D	6.37829e-05	-1.78479	/	0.0117014
BnaC03g49130D	6.40787e-05	-2.80084	/	0.0117282
BnaA09g07020D	6.41981e-05	-5.09493	AT5G64813	0.0117282
BnaC02g47790D	6.43928e-05	-2.21329	AT2G02240	0.0117392
BnaC03g58350D	6.46845e-05	-3.71486	AT1G28200	0.0117677
BnaA09g28970D	6.52625e-05	-4.30253	AT1G26520	0.0118481
BnaAnng08880D	6.59933e-05	-6.98695	AT4G13850	0.0119559
BnaC03g37650D	6.64058e-05	-2.63919	AT3G12520	0.0120057
BnaC02g13370D	6.68063e-05	-1.84241	AT5G55070	0.0120294
BnaA09g54630D	6.68715e-05	-2.42772	AT1G23980	0.0120294
BnaA02g14800D	6.69514e-05	-1.23231	AT1G56130	0.0120294
BnaA02g14250D	6.79504e-05	-1.34046	AT1G69340	0.0121838
BnaA02g15600D	6.83946e-05	-3.5529	AT5G41690	0.0122383
BnaC02g36140D	6.90053e-05	-1.61385	/	0.0123223
BnaC09g05260D	7.09891e-05	5.60611	AT5G61390	0.0126506
BnaA08g02800D	7.13295e-05	9.53654	AT1G49300	0.0126853
BnaC09g23540D	7.1694e-05	2.36773	AT4G12030	0.0127242
BnaA02g22060D	7.20544e-05	1.32227	AT4G28300	0.0127621
BnaAnng17270D	7.31888e-05	-0.796686	AT5G42970	0.0129367
BnaAnng26580D	7.36149e-05	-3.38353	AT5G61510	0.0129495
BnaC03g62010D	7.3713e-05	-2.41475	AT4G36150	0.0129495
BnaA02g35550D	7.37679e-05	-1.27405	AT1G71130	0.0129495
BnaC02g26000D	7.38555e-05	-1.33926	AT1G80870	0.0129495
BnaA02g15380D	7.41831e-05	-1.84756	AT1G71696	0.0129809
BnaC07g07870D	7.4384e-05	3.22572	AT3G23630	0.0129899
BnaA08g11370D	7.50071e-05	2.29853	AT4G34138	0.0130725
BnaA08g07870D	7.56386e-05	9.45453	AT1G31440	0.0131563
BnaA02g15950D	7.63682e-05	-2.787	AT1G72340	0.0132567
BnaA02g15640D	7.66936e-05	-1.376	AT1G71900	0.0132625
BnaC02g35850D	7.67059e-05	-2.3516	AT3G25990	0.0132625
BnaA09g52390D	7.69056e-05	-4.45571	AT5G63890	0.0132707
BnaA04g29090D	7.82311e-05	-1.62888	AT2G35040	0.0134728
BnaAnng20100D	7.90311e-05	-1.60529	AT1G73230	0.0135837
BnaC02g32440D	7.99097e-05	-3.19316	AT3G18295	0.0136882
BnaC02g31090D	7.99533e-05	-3.38436	AT5G44635	0.0136882
BnaCnng22200D	8.14787e-05	-1.57834	AT2G01460	0.0139026
BnaA08g27160D	8.1572e-05	2.19634	AT1G02520	0.0139026
BnaC02g35630D	8.17108e-05	-2.77546	AT3G25700	0.0139026
BnaA02g20140D	8.18435e-05	-1.31159	AT1G64970	0.0139026
BnaC03g76830D	8.21568e-05	2.8384	AT1G36280	0.0139286
BnaA08g29450D	8.38935e-05	-5.96668	AT4G14660	0.0141954
BnaC02g35120D	8.50524e-05	-1.93464	AT2G03730	0.0143636
BnaCnng48390D	8.67598e-05	5.28251	/	0.0145995
BnaA08g02910D	8.67843e-05	3.63323	AT1G48960	0.0145995
BnaAnng06990D	8.76242e-05	3.95438	AT5G51860	0.0146967
BnaA08g09030D	8.76994e-05	-8.0722	AT4G19112	0.0146967
BnaCnng60170D	8.82576e-05	-2.80059	AT1G80230	0.014733
BnaC02g40260D	8.85845e-05	-2.77842	AT1G56070	0.014733
BnaC02g42330D	8.87537e-05	-1.87584	AT5G62865	0.014733
BnaA02g15720D	8.87578e-05	-1.82044	AT1G72020	0.014733
BnaC02g47890D	8.87613e-05	-2.14135	AT1G79890	0.014733
BnaC02g30940D	8.91551e-05	-1.14331	AT5G44240	0.0147703
BnaA09g05390D	8.96488e-05	-4.78028	AT5G23290	0.0148239
BnaC02g48480D	9.08211e-05	-1.68369	AT5G26820	0.0149893
BnaA08g30740D	9.11529e-05	-2.68543	AT4G29010	0.0149909
BnaC02g48430D	9.11752e-05	-2.90939	AT5G26742	0.0149909
BnaC02g32920D	9.20017e-05	-1.97359	AT5G46940	0.0150983
BnaCnng22230D	9.31711e-05	-1.39636	AT2G01490	0.0152445
BnaC02g42040D	9.32422e-05	-3.19171	AT5G61150	0.0152445
BnaA08g09760D	9.45164e-05	-3.42708	AT4G21215	0.0154239
BnaA09g48280D	9.49331e-05	-4.05146	AT1G10150	0.0154595
BnaC02g34790D	9.52477e-05	-1.89974	AT2G02800	0.0154595
BnaA02g18790D	9.52668e-05	-1.79999	AT1G78150	0.0154595
BnaC02g38740D	9.54831e-05	-1.79135	AT5G48760	0.0154608
BnaA08g07320D	9.56301e-05	8.84361	AT5G33320	0.0154608
BnaC02g22980D	9.58434e-05	-1.18888	AT1G80560	0.0154666
BnaA03g23240D	9.66924e-05	2.80968	AT5G49700	0.015573
BnaCnng19500D	9.68597e-05	2.25069	/	0.015573
BnaCnng61390D	9.73599e-05	3.43844	AT5G63580	0.0156246
BnaC02g33390D	9.7902e-05	-2.0216	AT5G47630	0.0156601
BnaC02g31470D	9.79406e-05	-2.8254	AT5G45275	0.0156601
BnaC04g29320D	9.83343e-05	1.16313	AT4G13770	0.0156942
BnaA02g12080D	9.85146e-05	-2.03575	AT1G65410	0.0156943
BnaC02g29360D	9.97602e-05	-3.45401	AT4G10030	0.0158275
BnaCnng39450D	9.98128e-05	-2.34114	AT2G02980	0.0158275
BnaC02g47990D	9.9896e-05	-1.88988	AT2G03510	0.0158275
BnaA08g30480D	0.000100649	-6.40045	AT4G20360	0.0159179
BnaA04g15910D	0.000103406	2.24276	AT1G08310	0.0163243
BnaA02g18780D	0.000104017	-1.84925	AT1G78140	0.0163883
BnaC02g39980D	0.000104187	-2.53103	AT5G27030	0.0163883
BnaA07g37530D	0.000104568	1.28294	AT2G28315	0.0164185
BnaA05g05850D	0.000106501	2.89053	AT2G39720	0.0166919
BnaA02g12330D	0.000106829	0.259543	AT1G65970	0.01671
BnaC02g48760D	0.000107	-2.24312	AT5G24500	0.01671
BnaA08g09970D	0.000107523	-11.2174	AT4G20960	0.0167616
BnaA02g13720D	0.000108564	-2.20509	AT1G68310	0.0168937
BnaC04g42810D	0.000108762	-2.43771	AT2G31470	0.0168943
BnaA08g02470D	0.000110867	6.4818	AT1G49670	0.0171906
BnaCnng45890D	0.000111223	-1.2703	AT3G26330	0.0172153
BnaC02g37870D	0.000111576	-1.77916	AT3G29280	0.0172393
BnaC02g26080D	0.00011178	-0.354742	AT4G04620	0.0172403
BnaC04g34800D	0.000112638	-3.99314	AT4G12750	0.0173419
BnaC02g29660D	0.000113081	-3.14674	AT5G66750	0.0173681
BnaA08g08180D	0.000113207	-5.83795	AT4G17060	0.0173681
BnaC02g26490D	0.000114155	-2.20706	AT4G03180	0.0174828
BnaC02g41610D	0.000115041	-1.61641	AT5G23480	0.0175876
BnaA08g12470D	0.000115931	3.45338	AT4G31440	0.0176925
BnaA08g09630D	0.000116642	-11.5488	AT4G21660	0.0177699
BnaA02g15730D	0.000116886	-1.21472	AT1G72040	0.017776
BnaA08g08580D	0.000123653	3.08474	AT4G18160	0.0187724
BnaA06g16600D	0.000124571	3.73943	AT3G48360	0.0188789
BnaA02g35650D	0.000124856	0.0215702	AT1G68720	0.0188893
BnaA02g15970D	0.000125862	-1.26876	AT1G72390	0.0190085
BnaA08g30360D	0.000127236	-5.43246	AT4G16690	0.0191826
BnaA04g16030D	0.000129581	-2.86151	AT2G27775	0.0195025
BnaA05g20080D	0.000129928	-1.89975	AT3G20830	0.019521
BnaC09g30250D	0.000130606	1.73059	AT5G53890	0.0195891
BnaA10g16310D	0.000131328	-2.10523	AT5G18660	0.0196636
BnaA08g02960D	0.000131985	7.1522	AT1G48880	0.019728
BnaC02g39720D	0.000133073	-2.54099	AT5G27450	0.0198321
BnaCnng66340D	0.000133137	-2.03586	AT2G21160	0.0198321
BnaC09g39990D	0.000133693	-2.46396	AT4G16500	0.019881
BnaC02g33330D	0.000134287	-2.36019	AT5G47540	0.019929
BnaC02g40200D	0.000134594	-1.63611	AT5G26210	0.019929
BnaC03g62030D	0.000134702	-2.81916	AT4G36140	0.019929
BnaC04g13940D	0.000136338	14.6569	/	0.0201369
BnaC02g28060D	0.000138392	-1.4576	AT4G02150	0.0204057
BnaA07g30270D	0.000139204	-2.12144	AT1G72530	0.0204908
BnaC02g12750D	0.00014399	-1.63079	AT5G56010	0.0211595
BnaC02g34580D	0.000144737	-1.00178	AT2G02510	0.0212059
BnaC02g39290D	0.000144792	-3.58397	AT5G29000	0.0212059
BnaC06g05490D	0.000146076	3.38857	AT4G19540	0.021358
BnaC02g32740D	0.000146819	-2.93054	AT5G46800	0.0214306
BnaA08g07730D	0.000147428	-2.93782	AT1G31710	0.0214836
BnaA08g10440D	0.000150843	2.63056	AT1G20960	0.0219162
BnaA03g09950D	0.0001509	-1.41895	AT5G58030	0.0219162
BnaC02g48360D	0.000151783	-1.53898	AT5G26860	0.0220077
BnaC02g34300D	0.0001523	-1.4807	AT2G02070	0.022046
BnaA04g21180D	0.000153093	5.55421	AT2G36960	0.0221241
BnaCnng23900D	0.00015402	-1.98683	AT1G64860	0.0222213
BnaC02g12680D	0.000155403	-1.34238	AT5G56000	0.0223836
BnaA08g08110D	0.000157816	-3.35416	AT4G16790	0.0226465
BnaA09g05670D	0.000157971	4.08628	AT5G61340	0.0226465
BnaC02g39430D	0.000158008	-1.68483	AT5G28590	0.0226465
BnaC02g33700D	0.00015972	-0.911844	AT2G01170	0.0228134
BnaC02g33940D	0.000159911	-1.98453	AT2G01350	0.0228134
BnaA09g06770D	0.000159957	-4.65591	AT5G64270	0.0228134
BnaA08g09920D	0.000160573	-1.54177	AT4G21050	0.0228638
BnaA08g29880D	0.000160958	-1.82337	AT1G44090	0.0228813
BnaA02g12910D	0.000162097	0.305064	AT1G67170	0.0229817
BnaA08g29940D	0.000162467	8.67394	AT5G35620	0.0229817
BnaC08g48260D	0.000162627	-10.6537	AT4G16800	0.0229817
BnaA03g30030D	0.00016272	-1.10714	AT3G07460	0.0229817
BnaC02g47480D	0.000164704	-1.81635	AT5G45190	0.0232243
BnaA08g08220D	0.000165698	4.17568	AT4G17085	0.0232963
BnaC04g13320D	0.00016588	-1.69156	/	0.0232963
BnaA08g16620D	0.000166017	3.12442	AT4G39230	0.0232963
BnaC03g74990D	0.000167726	-2.56759	AT1G55860	0.0234366
BnaC02g42500D	0.000167827	-1.97466	AT5G63370	0.0234366
BnaA08g08290D	0.000168089	-3.00155	AT4G17486	0.0234366
BnaA04g05930D	0.000168092	-3.98643	AT4G36070	0.0234366
BnaA02g12150D	0.00016841	1.25096	AT1G65560	0.0234435
BnaC02g41800D	0.000169115	-3.60833	AT5G08130	0.0235023
BnaCnng39980D	0.000169372	-3.22431	AT4G37080	0.0235023
BnaA02g14460D	0.000169779	-0.0899908	AT1G69640	0.0235121
BnaC02g27280D	0.000169982	-2.44918	AT4G02480	0.0235121
BnaAnng31890D	0.000170371	-2.2314	AT2G36530	0.0235284
BnaA08g29720D	0.000174395	6.3298	AT1G42540	0.024046
BnaC02g41080D	0.000175008	-1.98613	AT5G24750	0.0240925
BnaAnng11250D	0.00017581	-7.31602	AT1G30890	0.0241647
BnaC02g35980D	0.000179588	-1.60395	AT3G26210	0.0246377
BnaAnng23110D	0.000179816	1.80342	AT1G17030	0.0246377
BnaC02g38230D	0.000180151	-1.49984	AT3G30775	0.0246448
BnaA05g35940D	0.000181234	4.84106	AT1G64563	0.0247313
BnaC02g36240D	0.000181351	-1.87628	AT3G26650	0.0247313
BnaA08g10190D	0.000182603	-6.0848	AT1G53360	0.0248631
BnaA02g13050D	0.000184459	-0.997414	AT1G67310	0.0250766
BnaC02g12760D	0.000184875	-1.43609	AT5G55910	0.0250941
BnaC02g32010D	0.000186433	-2.32034	AT5G45960	0.0252662
BnaA05g25270D	0.000186755	-0.993876	AT3G14200	0.0252705
BnaC02g46520D	0.000187832	-3.29571	AT1G80670	0.0253768
BnaA03g56380D	0.000188199	2.6721	AT2G36450	0.0253871
BnaC05g14840D	0.000192418	-3.74517	AT4G35840	0.0258773
BnaC02g41910D	0.000192427	-1.7903	AT5G60980	0.0258773
BnaA08g07370D	0.00019498	8.04813	AT5G32470	0.0261802
BnaA09g07160D	0.000197562	-3.40563	AT5G65670	0.0264861
BnaC02g40060D	0.000198217	-1.89317	AT5G26760	0.0265331
BnaC07g42790D	0.000198747	-2.49987	AT4G30640	0.0265632
BnaAnng27550D	0.000199767	-1.31123	AT1G05210	0.0266586
BnaC03g66980D	0.000203354	-0.900956	AT1G15757	0.0270958
BnaA05g09790D	0.000204968	-1.8537	AT2G33860	0.0272692
BnaC02g48120D	0.000207836	-1.38858	AT3G26890	0.0276086
BnaA08g11970D	0.000209103	5.62058	AT4G32915	0.0277347
BnaA08g12060D	0.000210789	4.40617	AT5G42240	0.0279158
BnaC03g60080D	0.000211435	3.02376	AT4G38620	0.0279589
BnaC02g40470D	0.000212082	-3.07126	AT5G25800	0.0280019
BnaC03g57170D	0.00021694	2.48666	AT3G47710	0.0285378
BnaA10g02710D	0.000217199	-1.68409	AT1G04570	0.0285378
BnaA08g04270D	0.00021734	-2.96059	AT4G36070	0.0285378
BnaA02g35670D	0.000217451	-4.08302	AT1G68660	0.0285378
BnaA10g07140D	0.000219826	-1.68956	AT5G53900	0.0288061
BnaC02g46880D	0.000221623	-1.82338	AT4G34880	0.0289836
BnaC08g48850D	0.000221846	-5.03461	AT3G59360	0.0289836
BnaC02g39790D	0.000225267	-3.47649	AT5G27630	0.0293695
BnaC04g32790D	0.000225474	-1.947	AT5G40660	0.0293695
BnaC03g63310D	0.000226993	-7.83682	AT4G19540	0.0295175
BnaC02g34380D	0.000227287	-2.03586	AT2G02170	0.0295175
BnaA10g04620D	0.000229917	-5.67395	AT1G07170	0.0298147
BnaC08g33950D	0.00023044	2.98326	AT2G24520	0.0298381
BnaA09g05620D	0.000231187	-3.15302	AT5G61170	0.0298903
BnaC06g23190D	0.000231871	-0.367691	AT1G74210	0.0299192
BnaA02g15800D	0.000232097	-0.251796	AT1G72130	0.0299192
BnaC02g38790D	0.000233436	-1.60483	AT5G48870	0.0300068
BnaC02g38760D	0.000233757	-2.4295	AT5G48830	0.0300068
BnaA08g26910D	0.000233809	-0.633362	AT1G08480	0.0300068
BnaA02g14110D	0.000234909	-0.343473	AT1G68890	0.0301036
BnaA09g39610D	0.000235291	-4.95544	AT3G62030	0.0301082
BnaC02g48350D	0.000236345	-1.78621	AT5G18180	0.0301988
BnaC02g34420D	0.000237818	-1.99493	AT2G02230	0.0303425
BnaA08g09640D	0.000238187	-7.0955	AT4G21620	0.0303452
BnaA09g05550D	0.000238579	-3.33782	AT5G60980	0.0303507
BnaA08g29810D	0.000240917	7.87314	AT1G43670	0.0306035
BnaA08g29710D	0.000244781	6.87746	AT1G34580	0.031049
BnaA02g13140D	0.000246442	0.512687	AT1G67430	0.0311856
BnaA08g10410D	0.000246573	-9.73086	AT4G22670	0.0311856
BnaA08g03940D	0.000248125	3.78301	AT5G38820	0.0313363
BnaC02g28670D	0.00025014	-1.5102	AT5G42700	0.0315451
BnaC02g40860D	0.000253577	-1.86114	AT5G25150	0.0319251
BnaAnng33680D	0.000253957	0.0185509	AT1G68760	0.0319251
BnaC02g28660D	0.000254252	-1.27649	AT5G42655	0.0319251
BnaC07g47200D	0.000255291	0.967781	AT5G52320	0.0319954
BnaC02g39060D	0.000255546	-1.64432	AT5G49400	0.0319954
BnaUnng04840D	0.000256716	-2.1392	/	0.0320585
BnaCnng68040D	0.000257154	2.7054	AT3G14420	0.0320585
BnaC06g38860D	0.000257154	2.7054	AT3G14420	0.0320585
BnaC02g39900D	0.000260105	-1.71964	AT5G27850	0.0323802
BnaA09g38200D	0.000261508	-1.07466	AT3G59950	0.0325083
BnaCnng39460D	0.000266331	-1.2035	AT2G02990	0.0330607
BnaC02g33980D	0.000268177	-1.70999	AT2G01540	0.0332425
BnaC02g35690D	0.000268982	-1.67452	AT3G25870	0.0332949
BnaA02g18530D	0.000273447	-1.84881	AT1G77140	0.0337996
BnaC02g41600D	0.000273874	-1.6388	AT5G23540	0.0338044
BnaA02g15110D	0.000276716	-1.5843	AT1G70690	0.034107
BnaA08g09530D	0.000277342	-3.78249	AT4G20880	0.0341357
BnaC05g27230D	0.000279685	-3.21444	AT1G38131	0.0343295
BnaA08g01730D	0.000279737	5.94412	/	0.0343295
BnaC02g33670D	0.000280098	-1.26599	AT2G01150	0.0343295
BnaA02g17780D	0.000281505	-1.13665	AT1G76860	0.0344535
BnaC02g47610D	0.000282355	-1.96569	AT2G01400	0.0345091
BnaA08g05340D	0.000284781	6.70607	AT4G14500	0.0347568
BnaCnng42110D	0.000287543	-1.95095	AT4G11260	0.0350449
BnaA02g15830D	0.000288173	-2.33121	AT1G72160	0.0350726
BnaC02g28070D	0.0002899	-1.4151	AT4G02210	0.0352335
BnaA02g13310D	0.00029468	-1.55684	AT1G67730	0.0357646
BnaC08g14730D	0.000295159	1.49587	AT1G11170	0.0357729
BnaC09g37590D	0.000297446	-5.26633	AT5G20190	0.035964
BnaC06g19940D	0.00029773	2.14991	AT1G79270	0.035964
BnaC02g46730D	0.000297974	-1.45797	AT4G12400	0.035964
BnaC03g61380D	0.000302261	-8.67917	AT4G37480	0.036431
BnaCnng20550D	0.000303739	-0.772919	AT5G04330	0.0365586
BnaA09g06200D	0.000304548	-4.29193	AT5G62710	0.0366054
BnaC09g26970D	0.000306408	-2.35522	AT5G50820	0.0367783
BnaA03g40340D	0.000307409	-2.69492	AT5G61570	0.0367853
BnaC02g10240D	0.000307716	-1.36557	AT5G59180	0.0367853
BnaA07g17280D	0.000307733	3.23933	AT3G57390	0.0367853
BnaCnng21330D	0.000309619	-1.11802	AT1G53330	0.0369601
BnaC03g69380D	0.000312711	2.95596	AT1G53100	0.037278
BnaC06g12000D	0.000314614	-1.61156	/	0.0374537
BnaC09g47140D	0.000316176	-4.067	AT5G09380	0.0375843
BnaC02g33050D	0.000316641	-1.55017	AT5G47030	0.0375843
BnaA08g14300D	0.000317005	-4.35225	AT4G26780	0.0375843
BnaC05g11020D	0.000318229	-1.89628	AT1G79960	0.0376781
BnaC02g41560D	0.000318952	-1.20715	AT5G23740	0.0377125
BnaCnng58960D	0.000320634	-1.67911	AT3G27830	0.0378454
BnaC02g35890D	0.000321212	-2.70661	AT3G26100	0.0378454
BnaC08g36110D	0.000321379	-3.08802	AT2G20920	0.0378454
BnaA02g16850D	0.000322738	-2.27479	AT1G74250	0.0379542
BnaC03g63720D	0.000326741	-9.97026	AT4G20130	0.0383731
BnaA02g15740D	0.00032865	-1.88466	AT1G72050	0.0385454
BnaA02g30390D	0.000329726	0.953749	AT5G48720	0.0386196
BnaA06g14340D	0.000331584	-2.7492	AT1G20270	0.0387851
BnaA08g11050D	0.000332155	-9.77592	AT4G34660	0.0387998
BnaA08g03020D	0.000334049	10.4787	AT1G48790	0.0389193
BnaA08g13960D	0.000334072	-3.05826	AT4G27940	0.0389193
BnaCnng65700D	0.000336034	-1.7134	AT5G19290	0.0390957
BnaA02g18710D	0.000336916	-1.24278	AT1G78050	0.039146
BnaC02g23300D	0.00033863	-1.67952	AT1G80150	0.0392929
BnaA08g11520D	0.000341193	1.20941	AT4G33600	0.0395376
BnaA08g15850D	0.000342462	-3.26436	AT4G37880	0.0396319
BnaA02g15780D	0.000344687	-1.17884	AT1G72125	0.0398365
BnaA02g13280D	0.000350251	-2.13737	AT1G67630	0.0404259
BnaC05g17680D	0.000352225	-2.83141	/	0.0405782
BnaC05g42100D	0.000352502	-1.3441	AT2G46730	0.0405782
BnaAnng15350D	0.000356009	-5.25062	AT4G34910	0.040882
BnaC08g03080D	0.000356079	-1.54448	AT1G49190	0.040882
BnaC02g41640D	0.000358322	-1.0794	AT5G23420	0.0410854
BnaA02g10330D	0.000359856	2.40614	AT5G53300	0.0411571
BnaC02g38680D	0.000359892	-1.39227	AT5G48580	0.0411571
BnaC09g28170D	0.000361136	3.80575	AT5G51950	0.0412452
BnaA08g21650D	0.000362892	-0.643154	AT1G20790	0.0413787
BnaA08g04080D	0.000363254	-4.52871	AT1G47128	0.0413787
BnaC02g33520D	0.000364035	-0.987514	AT5G59810	0.0414135
BnaA02g15340D	0.000365441	-0.208097	AT1G71070	0.0415192
BnaC08g32110D	0.000365929	1.13655	AT3G62300	0.0415206
BnaC07g15300D	0.000367732	-3.31428	AT1G20580	0.0416709
BnaC02g12720D	0.000371558	-1.6722	AT5G55940	0.0420497
BnaC02g06860D	0.000378494	-1.94106	AT5G58412	0.0427792
BnaA10g04660D	0.000379858	-2.78387	AT1G07210	0.0428265
BnaAnng27450D	0.000379896	-2.12839	AT4G32870	0.0428265
BnaC02g33920D	0.000380591	-1.64157	AT5G36290	0.0428495
BnaCnng66620D	0.000385146	-2.35143	AT1G11430	0.0433063
BnaA02g12250D	0.000385999	1.0725	AT1G65720	0.0433281
BnaC02g12940D	0.000386369	-1.81568	AT1G60700	0.0433281
BnaC03g77290D	0.000386831	-8.53569	AT4G31600	0.0433281
BnaA08g15810D	0.000389774	-5.26871	AT4G37830	0.0436017
BnaA03g59890D	0.000394181	-2.4657	/	0.0440382
BnaC02g05200D	0.000398331	-1.40732	AT5G14240	0.0444448
BnaA08g09180D	0.000399548	4.95149	AT4G19410	0.0445235
BnaA09g04870D	0.000401288	2.89261	AT5G24440	0.0446603
BnaC02g32930D	0.000405592	-2.66207	AT5G47600	0.0450818
BnaA05g25410D	0.00040829	6.95516	AT3G14050	0.0452807
BnaC08g46560D	0.000408421	-3.87035	/	0.0452807
BnaA02g15130D	0.000409641	-1.5692	AT1G70740	0.0453117
BnaA05g20120D	0.000410203	-3.19036	AT3G20790	0.0453117
BnaA08g00770D	0.000410261	-4.00979	AT1G54260	0.0453117
BnaC07g41080D	0.000411035	-2.63341	AT4G27890	0.0453145
BnaA08g10430D	0.000411326	-4.89473	AT4G22690	0.0453145
BnaA02g14100D	0.000415065	-3.12869	AT1G68880	0.0456687
BnaCnng60400D	0.00041578	3.55749	AT5G61560	0.0456896
BnaC03g76340D	0.000420033	-1.68886	AT4G39680	0.0460119
BnaC05g15980D	0.000420185	-2.54665	AT5G07740	0.0460119
BnaA03g11920D	0.000420296	1.40787	AT5G54300	0.0460119
BnaAnng15380D	0.000425222	-7.36732	AT4G34840	0.0464927
BnaA03g03980D	0.000426638	2.38454	AT5G12420	0.0465891
BnaC05g20190D	0.00042751	-5.45619	AT1G26640	0.0466259
BnaC02g28700D	0.000428866	-1.14872	/	0.0466733
BnaC02g36650D	0.000429016	-1.00157	AT3G27090	0.0466733
BnaC03g78040D	0.000431285	-3.68598	AT1G51350	0.0468617
BnaC02g37830D	0.0004435	-1.02691	AT3G29270	0.0480991
BnaC02g39880D	0.000444073	-1.4608	AT5G27820	0.0480991
BnaC01g33720D	0.000444329	2.71297	AT3G18900	0.0480991
BnaA08g10640D	0.000447609	-4.142	AT4G23530	0.048394
BnaC08g13590D	0.000450156	0.864775	AT1G08500	0.048609
BnaC02g26350D	0.000452593	-1.91404	AT4G04720	0.0488117
BnaA02g18660D	0.000454805	-0.891067	AT1G77800	0.0489896
BnaC06g19890D	0.000460723	-3.68007	AT1G79380	0.0495217
BnaA08g12130D	0.000460881	9.26676	AT4G32600	0.0495217
BnaA08g14500D	0.000461474	-1.9244	AT4G25300	0.0495244
BnaA08g08980D	0.000463172	-7.62171	AT4G19006	0.0496246
BnaC02g33470D	0.000463547	-2.40249	AT5G47710	0.0496246
BnaA03g29600D	0.000466228	-1.56743	AT3G06750	0.0497892
BnaA04g09250D	0.000466228	-1.56743	AT3G06750	0.0497892

## Sheet: ST7
Table S7. Summary of TWAS-significant genes for erucic acid at 40 DAF
Gene	Lmm_p	Lr_beta	Tair	FDR
BnaA08g10900D	3.56132e-38	-5.71475	/	2.8518e-33
BnaA08g11870D	1.06861e-30	4.79934	AT4G33210	4.27857e-26
BnaA08g11190D	1.23127e-27	-10.0764	AT4G34430	3.28654e-23
BnaC03g77050D	8.66523e-27	-5.73631	AT2G27960	1.73471e-22
BnaC03g77060D	5.77815e-25	5.40426	AT3G42050	9.25394e-21
BnaA08g10050D	2.79817e-22	-4.53113	AT4G21865	3.43919e-18
BnaA08g10170D	3.00639e-22	-6.19435	AT4G22220	3.43919e-18
BnaA08g11590D	1.92755e-21	-10.1184	AT4G34120	1.92941e-17
BnaA08g12100D	6.72891e-20	-8.52881	AT4G32680	5.98701e-16
BnaA08g11470D	1.98592e-19	7.49049	AT4G33680	1.59026e-15
BnaA08g12340D	8.11253e-19	3.45138	AT4G31830	5.9057e-15
BnaA08g11640D	1.82348e-18	10.1	AT4G34050	1.21683e-14
BnaA08g30680D	1.5711e-17	5.93427	AT4G32272	9.67761e-14
BnaA08g12360D	2.41874e-17	-8.74397	AT4G31770	1.38347e-13
BnaA08g10220D	3.59898e-17	-13.4836	AT4G22360	1.9213e-13
BnaA08g11580D	4.03371e-17	9.31329	AT4G33520	2.01879e-13
BnaAnng08820D	4.91686e-17	2.83127	AT4G13950	2.31604e-13
BnaA08g10160D	1.90388e-16	-12.0618	AT4G22140	8.46982e-13
BnaC03g66730D	2.17766e-15	-12.3893	AT4G33210	9.17791e-12
BnaA08g11050D	1.93193e-14	-10.6843	AT4G34660	7.73516e-11
BnaA08g10230D	3.71112e-14	-10.6192	AT4G12590	1.3655e-10
BnaA08g08530D	3.7515e-14	-7.84527	AT4G18040	1.3655e-10
BnaA08g12110D	4.41482e-14	-8.56024	AT4G32680	1.53707e-10
BnaA08g11770D	4.87801e-14	14.3553	AT4G33430	1.61166e-10
BnaA08g11600D	5.18391e-14	-11.5373	AT5G11760	1.61166e-10
BnaA08g10000D	5.23287e-14	5.34724	AT4G21710	1.61166e-10
BnaA08g30590D	5.68523e-14	-7.44094	AT4G02890	1.68613e-10
BnaA08g11910D	7.04688e-14	-5.54087	AT4G33090	2.01533e-10
BnaC03g60490D	1.04501e-13	-5.84489	AT4G39260	2.88557e-10
BnaCnng77270D	1.56127e-13	3.43228	/	4.1674e-10
BnaA08g09790D	2.70642e-13	-6.27031	AT4G21160	6.99102e-10
BnaA08g12030D	3.6037e-13	6.59666	AT4G32760	9.01792e-10
BnaC03g29980D	4.18673e-13	-3.66502	AT3G17900	1.01594e-09
BnaA08g11040D	5.56962e-13	-10.4678	AT4G34670	1.31176e-09
BnaA08g30310D	6.91958e-13	-4.57421	AT4G16610	1.58314e-09
BnaA08g09980D	8.80091e-13	-8.01116	AT4G20940	1.95764e-09
BnaA08g12140D	2.34335e-12	4.14232	AT4G32570	5.07158e-09
BnaA08g05840D	3.33095e-12	-4.10991	AT4G15765	7.01928e-09
BnaA08g09800D	3.44051e-12	-3.93298	/	7.06424e-09
BnaA08g11320D	3.64511e-12	-14.1866	AT4G34200	7.29724e-09
BnaA08g09150D	1.12795e-11	-9.42491	AT4G19210	2.203e-08
BnaC01g01300D	1.18486e-11	-3.92092	/	2.22008e-08
BnaC03g66780D	1.19215e-11	-7.27089	AT4G33050	2.22008e-08
BnaC06g01690D	1.28601e-11	12.7327	/	2.34046e-08
BnaA08g08170D	1.52276e-11	-3.80421	AT4G16980	2.70973e-08
BnaC08g46770D	1.66391e-11	-12.4923	AT4G13950	2.89654e-08
BnaA08g11930D	2.55985e-11	-8.57513	AT4G33050	4.36139e-08
BnaA08g30180D	3.11506e-11	-4.10241	AT4G14570	5.19676e-08
BnaA08g08860D	6.19648e-11	-6.12915	AT4G18570	1.01264e-07
BnaC03g66460D	6.44925e-11	-12.6508	AT4G33630	1.03287e-07
BnaA08g10150D	8.11594e-11	-8.26716	AT4G22130	1.27431e-07
BnaC03g66650D	9.81248e-11	9.83171	AT1G29880	1.51107e-07
BnaA08g11340D	1.15569e-10	-7.19815	AT3G42050	1.74611e-07
BnaA08g04960D	1.64602e-10	2.52216	AT1G77230	2.44089e-07
BnaAnng27210D	2.10488e-10	-10.097	AT4G19900	3.06459e-07
BnaA08g02730D	2.43748e-10	-11.6995	AT1G49380	3.48547e-07
BnaA08g10130D	3.33566e-10	5.2461	AT1G60260	4.68613e-07
BnaAnng19130D	3.68359e-10	-6.21892	AT4G17330	5.0857e-07
BnaA08g12330D	5.02825e-10	-4.41737	AT4G31840	6.82453e-07
BnaC03g76980D	6.42058e-10	4.30172	AT4G19870	8.56901e-07
BnaA08g09060D	6.88617e-10	-5.65121	AT4G19120	9.03974e-07
BnaA08g11740D	7.98454e-10	6.84507	AT4G33920	1.03126e-06
BnaA08g10860D	8.71663e-10	-8.84317	AT4G35100	1.10794e-06
BnaA08g06980D	9.30994e-10	4.62688	AT1G76065	1.16486e-06
BnaA08g07020D	1.2542e-09	-7.46502	AT1G31970	1.54512e-06
BnaA08g07210D	1.29859e-09	-10.9083	AT5G35180	1.57557e-06
BnaCnng78760D	1.41211e-09	4.13257	AT3G50710	1.68773e-06
BnaA08g30290D	1.43599e-09	-6.05084	AT4G17300	1.69103e-06
BnaA08g09100D	1.48964e-09	-7.28445	AT4G19160	1.72878e-06
BnaA08g07200D	1.54138e-09	7.79426	AT5G35170	1.76328e-06
BnaA08g08570D	1.67149e-09	5.03206	/	1.88518e-06
BnaA08g08510D	1.72584e-09	-9.26852	AT4G17950	1.91944e-06
BnaA08g08350D	1.93969e-09	-8.06391	AT4G17550	2.12773e-06
BnaA08g08550D	2.09686e-09	-8.73434	AT4G18100	2.26905e-06
BnaC03g61240D	2.46386e-09	-11.1453	AT4G37820	2.63065e-06
BnaC03g64530D	2.53013e-09	-3.99398	AT4G21710	2.66586e-06
BnaC03g77130D	3.07534e-09	-1.53861	AT4G33985	3.17534e-06
BnaA08g11650D	3.09298e-09	5.23976	AT4G34030	3.17534e-06
BnaA08g29910D	3.22658e-09	4.38231	AT2G06520	3.27057e-06
BnaC07g02940D	3.54355e-09	4.7719	/	3.54696e-06
BnaCnng62920D	4.2333e-09	-12.7881	AT4G39680	4.18506e-06
BnaA10g13430D	4.86791e-09	-7.31193	AT4G34588	4.75376e-06
BnaA08g02780D	5.19338e-09	-7.34198	AT1G49320	5.01048e-06
BnaA08g09630D	5.36506e-09	-14.4234	AT4G21660	5.06257e-06
BnaC03g66990D	5.37381e-09	-1.89301	AT2G12480	5.06257e-06
BnaA08g12090D	5.50741e-09	8.46437	AT3G26560	5.1281e-06
BnaA08g30210D	6.30416e-09	-9.69503	AT4G17150	5.80251e-06
BnaA02g30860D	7.25055e-09	3.2694	/	6.57414e-06
BnaC03g66190D	7.3067e-09	-9.5707	AT4G34350	6.57414e-06
BnaAnng31110D	8.03447e-09	-8.87065	AT4G18710	7.02463e-06
BnaA08g10700D	8.03595e-09	-13.4812	AT4G35260	7.02463e-06
BnaC03g64990D	8.07056e-09	-4.89541	AT2G04305	7.02463e-06
BnaC09g01300D	8.89592e-09	-3.42435	AT3G27010	7.65977e-06
BnaC03g76260D	9.45086e-09	-5.0733	AT4G39730	8.05102e-06
BnaA08g08200D	1.08495e-08	-5.27614	AT4G17070	9.14522e-06
BnaAnng33750D	1.12799e-08	-5.23146	AT2G30290	9.40893e-06
BnaC03g65810D	1.34781e-08	-12.7946	AT4G34710	1.11266e-05
BnaA08g11170D	1.4337e-08	-10.8584	AT4G34450	1.16205e-05
BnaA08g11840D	1.43666e-08	7.73243	AT4G33300	1.16205e-05
BnaA08g03630D	1.45236e-08	3.73145	AT1G47860	1.16301e-05
BnaA08g11480D	1.51111e-08	-7.25945	AT4G33670	1.19807e-05
BnaA09g05650D	1.58563e-08	-4.11845	AT5G61240	1.24483e-05
BnaA08g10410D	1.63504e-08	-11.6791	AT4G22670	1.27116e-05
BnaA08g12450D	1.82188e-08	-6.24709	AT4G31480	1.4028e-05
BnaC03g60140D	1.9181e-08	-8.39449	AT4G38710	1.45225e-05
BnaA08g09970D	1.93894e-08	-9.48523	AT4G20960	1.45225e-05
BnaC03g65020D	1.94052e-08	-5.04968	AT4G22560	1.45225e-05
BnaA08g01130D	2.24339e-08	-2.38839	AT1G53380	1.66337e-05
BnaA08g30710D	2.31976e-08	-6.86471	AT4G31700	1.70421e-05
BnaA08g07050D	2.40257e-08	-5.93798	AT1G31880	1.74901e-05
BnaA08g08750D	2.60733e-08	-5.58781	/	1.87839e-05
BnaAnng21820D	2.62721e-08	-5.60778	AT4G28360	1.87839e-05
BnaA08g10430D	2.84027e-08	-4.71969	AT4G22690	2.01274e-05
BnaA08g30700D	2.96313e-08	-3.53481	AT4G31610	2.08139e-05
BnaUnng05100D	3.22045e-08	-3.5202	/	2.24247e-05
BnaA08g10510D	3.60621e-08	-11.0464	AT4G22920	2.48943e-05
BnaCnng76650D	4.00165e-08	-2.11978	/	2.7388e-05
BnaC03g63310D	4.52323e-08	-7.66221	AT4G19540	3.06955e-05
BnaC03g60120D	4.59696e-08	-7.99966	AT4G38660	3.09251e-05
BnaC03g76330D	4.63431e-08	-13.1727	AT4G39690	3.09251e-05
BnaA05g12830D	4.83052e-08	-2.90229	AT4G19645	3.19681e-05
BnaA08g12250D	4.95226e-08	-6.21679	AT4G32300	3.25051e-05
BnaA08g30460D	5.42803e-08	-7.75914	AT4G20270	3.53382e-05
BnaC03g77030D	5.49883e-08	-9.60797	AT4G34200	3.54772e-05
BnaA08g04310D	5.53798e-08	-3.24603	AT5G66970	3.54772e-05
BnaC03g66660D	6.02232e-08	8.28084	AT1G29880	3.82738e-05
BnaA08g12120D	6.47353e-08	7.40249	AT4G32610	4.05404e-05
BnaC03g64540D	6.48022e-08	-4.7313	AT4G21710	4.05404e-05
BnaA08g08330D	6.59721e-08	-8.02782	AT4G17520	4.09523e-05
BnaC03g63270D	7.52465e-08	-4.86598	AT1G43270	4.63501e-05
BnaA08g08370D	8.76153e-08	-4.37134	AT4G17570	5.3557e-05
BnaCnng54330D	9.30208e-08	-1.81546	AT5G47930	5.64305e-05
BnaA08g11150D	1.04088e-07	-9.76078	AT4G34490	6.19769e-05
BnaC03g77140D	1.04258e-07	-1.16699	AT1G43140	6.19769e-05
BnaA08g08500D	1.04485e-07	-7.18836	AT4G17940	6.19769e-05
BnaAnng41100D	1.1184e-07	1.58433	AT1G36160	6.58515e-05
BnaA08g10980D	1.13203e-07	-5.00953	AT3G18000	6.61676e-05
BnaA09g30170D	1.25908e-07	-8.77923	AT1G23010	7.30603e-05
BnaC02g42050D	1.28178e-07	-4.93784	AT5G61170	7.36988e-05
BnaA08g08760D	1.29281e-07	5.31048	AT4G18425	7.36988e-05
BnaA08g30480D	1.29769e-07	-9.18563	AT4G20360	7.36988e-05
BnaA08g30400D	1.40431e-07	-5.02144	AT4G20150	7.91921e-05
BnaC03g64580D	1.52416e-07	-8.20372	AT4G21800	8.53498e-05
BnaA08g08360D	1.56689e-07	-6.65048	AT4G17560	8.71331e-05
BnaA02g12020D	1.6576e-07	-3.9398	AT1G65260	9.15418e-05
BnaC08g07860D	1.83743e-07	-4.80455	AT1G32050	0.000100778
BnaA08g12680D	2.09958e-07	-8.65029	AT4G31130	0.000114373
BnaA08g12480D	2.11747e-07	5.92689	AT4G31430	0.000114568
BnaA08g09210D	2.38803e-07	-3.48913	AT4G19500	0.00012834
BnaCnng19500D	2.56304e-07	4.68317	/	0.000135997
BnaA08g09730D	2.56447e-07	-8.30387	AT4G21450	0.000135997
BnaA06g04740D	2.717e-07	-3.2999	AT1G08300	0.000142582
BnaA08g12590D	2.72426e-07	2.92253	AT3G48110	0.000142582
BnaC02g41820D	2.77715e-07	-3.44889	AT5G60850	0.000144407
BnaC08g13280D	2.91435e-07	-4.04943	AT4G29020	0.000150563
BnaA08g03940D	3.35641e-07	4.12538	AT5G38820	0.000172289
BnaC02g33900D	3.74289e-07	-2.84573	AT2G01320	0.00019089
BnaA08g08210D	3.76646e-07	-9.77084	AT4G17080	0.00019089
BnaC02g33660D	4.16196e-07	-3.02357	AT2G01140	0.000209608
BnaA10g24140D	4.32215e-07	6.39062	AT4G34710	0.000215025
BnaA08g30670D	4.32321e-07	-5.41997	AT4G32270	0.000215025
BnaA08g09340D	4.37271e-07	-7.47129	AT4G19830	0.000216144
BnaC07g48920D	4.67816e-07	2.38776	AT5G35912	0.000229824
BnaA08g12500D	4.97073e-07	3.90768	AT4G31400	0.000242708
BnaA09g05160D	5.25548e-07	-3.16149	AT4G39160	0.000255056
BnaA09g37450D	5.63036e-07	-4.67712	AT3G58500	0.000269351
BnaC07g30180D	5.64827e-07	-5.29361	AT5G24280	0.000269351
BnaA08g08380D	5.65094e-07	-5.90366	AT4G17650	0.000269351
BnaC03g64570D	5.73947e-07	-6.71862	AT4G04890	0.000271953
BnaA09g05200D	6.45526e-07	-5.27098	AT5G23630	0.000304069
BnaA08g11130D	6.94707e-07	-13.1944	AT4G34520	0.000325322
BnaC03g65070D	7.1391e-07	-4.53242	/	0.000332371
BnaA08g04190D	7.23996e-07	3.04583	AT1G45474	0.00033376
BnaC04g13680D	7.25229e-07	-6.22043	AT3G59820	0.00033376
BnaA08g09030D	7.6462e-07	-12.1156	AT4G19112	0.000349877
BnaAnng15350D	8.0934e-07	-5.7559	AT4G34910	0.000368236
BnaC04g13940D	8.16223e-07	13.9623	/	0.000369269
BnaA08g30220D	8.55076e-07	-7.45921	AT4G17170	0.000384674
BnaA09g06140D	9.14439e-07	3.22272	AT5G62580	0.000409081
BnaC05g24100D	9.49241e-07	-3.11023	AT1G31880	0.000422291
BnaA02g15050D	9.73917e-07	-4.13646	AT1G70620	0.000429435
BnaA08g01100D	9.76025e-07	-3.00925	AT1G53460	0.000429435
BnaC03g49130D	9.88694e-07	-2.56533	/	0.000430755
BnaA08g10190D	9.89785e-07	-4.23176	AT1G53360	0.000430755
BnaA08g08120D	1.0302e-06	-10.0363	AT4G16800	0.00044592
BnaC06g13790D	1.03695e-06	-3.58963	/	0.000446431
BnaA02g15650D	1.04711e-06	-3.17864	AT1G71920	0.000448391
BnaA08g08660D	1.05978e-06	-9.44014	AT4G18240	0.000451403
BnaA08g07730D	1.08795e-06	-2.83781	AT1G31710	0.000460949
BnaA06g03380D	1.12098e-06	2.15997	AT5G56630	0.000472447
BnaC02g33150D	1.18696e-06	-2.92433	AT3G01910	0.000497633
BnaC02g33310D	1.2352e-06	-4.69309	AT5G47520	0.00051516
BnaC07g48930D	1.2806e-06	3.10787	AT3G26790	0.00053133
BnaCnng74960D	1.29512e-06	2.0018	AT5G61820	0.000532808
BnaCnng22210D	1.29747e-06	-1.71042	AT2G01470	0.000532808
BnaA04g05580D	1.31422e-06	-3.83427	AT3G52240	0.000536932
BnaA02g15830D	1.34761e-06	-3.34038	AT1G72160	0.000547778
BnaCnng41700D	1.36027e-06	-3.19383	AT5G47820	0.000548111
BnaAnng26540D	1.36212e-06	-4.1354	/	0.000548111
BnaA02g15600D	1.45396e-06	-3.14859	AT5G41690	0.000581317
BnaCnng28630D	1.45915e-06	2.0052	AT3G22640	0.000581317
BnaA08g12020D	1.50851e-06	-9.92188	AT4G32790	0.000598004
BnaA08g29450D	1.52271e-06	-5.60298	AT4G14660	0.000600661
BnaAnng22940D	1.54241e-06	-2.38194	AT3G25660	0.000605447
BnaC02g33460D	1.599e-06	-3.01288	AT5G47690	0.0006246
BnaA03g12740D	1.60815e-06	-6.70111	AT5G52190	0.000625124
BnaA08g07860D	1.66264e-06	8.90497	AT1G31480	0.000643186
BnaA08g08270D	1.71429e-06	-7.9049	AT4G17390	0.000656834
BnaA08g02800D	1.71433e-06	6.94372	AT1G49300	0.000656834
BnaC05g51210D	1.72769e-06	-6.29186	AT1G50480	0.000658803
BnaC04g32790D	1.74036e-06	-3.91561	AT5G40660	0.000660489
BnaC01g13560D	1.90352e-06	-3.33794	AT4G19670	0.000718244
BnaC05g04620D	1.91139e-06	-8.29151	AT1G06710	0.000718244
BnaCnng41680D	1.91946e-06	-3.90615	/	0.000718244
BnaA03g22870D	2.10985e-06	-6.20946	AT2G25790	0.00078421
BnaA08g30000D	2.11533e-06	4.01177	AT5G35790	0.00078421
BnaAnng07020D	2.13922e-06	-12.8501	AT5G61780	0.000788811
BnaA08g13580D	2.15629e-06	-2.47524	/	0.000788811
BnaC03g66490D	2.15729e-06	-3.55676	AT4G33600	0.000788811
BnaA08g09710D	2.22603e-06	-4.4645	AT4G21534	0.000810243
BnaCnng52550D	2.26655e-06	-3.66078	/	0.000821261
BnaA06g24720D	2.29004e-06	2.12262	/	0.000826032
BnaC06g13360D	2.3056e-06	5.53169	/	0.000827916
BnaA08g12410D	2.32559e-06	-2.13447	AT1G77520	0.000831366
BnaA08g05340D	2.37738e-06	7.10028	AT4G14500	0.000846106
BnaA08g10920D	2.40938e-06	-11.913	AT4G35040	0.000853699
BnaA08g03050D	2.48088e-06	3.29008	AT1G48750	0.000875161
BnaA07g11090D	2.53156e-06	-2.35795	AT1G21090	0.000889121
BnaC02g33510D	2.59234e-06	-3.24302	AT4G15950	0.000906494
BnaA01g18420D	2.61522e-06	-6.3585	/	0.000910516
BnaA08g03420D	2.69796e-06	-6.74199	/	0.000933634
BnaA08g08650D	2.70493e-06	-3.81693	AT4G18210	0.000933634
BnaC03g59130D	2.7508e-06	-14.8179	AT1G30120	0.000944576
BnaC03g66230D	2.76023e-06	4.41904	AT4G34290	0.000944576
BnaAnng31880D	2.83483e-06	-9.5133	AT4G18700	0.000965979
BnaA08g08880D	2.91664e-06	-5.47101	AT4G18593	0.000989643
BnaA02g18540D	3.0507e-06	3.5721	AT4G08596	0.00103076
BnaA02g16420D	3.09532e-06	-3.44543	AT1G73380	0.00104145
BnaA08g04600D	3.22447e-06	7.23334	AT1G42960	0.00107676
BnaC03g38380D	3.22718e-06	-7.50557	AT3G14225	0.00107676
BnaC02g32060D	3.36597e-06	-3.24996	AT5G46020	0.00111841
BnaA02g16850D	3.4135e-06	-4.54181	AT1G74250	0.00112951
BnaC05g30220D	3.47465e-06	-6.66025	AT3G22310	0.00114502
BnaC03g56240D	3.52556e-06	-8.9592	AT3G46970	0.00115703
BnaCnng22200D	3.57497e-06	-2.03408	AT2G01460	0.00116846
BnaA08g10100D	3.63144e-06	-7.40687	AT5G11250	0.00118209
BnaA08g12600D	3.70345e-06	3.12885	AT4G31290	0.00119832
BnaA08g09510D	3.71123e-06	-3.92067	AT4G20830	0.00119832
BnaA02g21400D	3.72893e-06	-2.06879	AT1G50440	0.0011992
BnaA08g12640D	3.75106e-06	-3.52656	AT4G31150	0.00120149
BnaA07g20970D	3.84468e-06	-5.39988	AT1G77470	0.00122658
BnaAnng09380D	3.86075e-06	-4.93476	AT3G11940	0.00122681
BnaC09g01260D	3.93289e-06	-3.6613	AT3G26990	0.00124193
BnaA06g16480D	3.93935e-06	-3.51715	/	0.00124193
BnaA08g06750D	3.99298e-06	-3.66975	/	0.00125062
BnaC09g06050D	4.00187e-06	-2.77362	AT5G63680	0.00125062
BnaC03g66700D	4.01377e-06	-4.27992	AT4G33260	0.00125062
BnaA08g06420D	4.13404e-06	3.01388	AT1G34355	0.00128311
BnaA03g49680D	4.18999e-06	1.09856	AT1G14350	0.00129545
BnaA08g06540D	4.21973e-06	5.30694	AT1G33990	0.00129963
BnaC03g67840D	4.24535e-06	-6.07105	AT4G30930	0.00130251
BnaA03g28220D	4.33806e-06	4.95888	AT3G03150	0.00132587
BnaCnng30710D	4.49819e-06	-3.79713	AT4G10790	0.00136959
BnaA08g12610D	4.58424e-06	5.95734	AT4G31270	0.0013905
BnaC03g68360D	4.64664e-06	-7.79706	AT1G49890	0.00140411
BnaC01g27380D	4.70077e-06	2.57356	AT1G55340	0.00141513
BnaA08g09860D	4.92688e-06	-5.45893	AT4G21070	0.00147764
BnaCnng40030D	4.99716e-06	-4.88692	AT4G37020	0.00149313
BnaA08g09450D	5.11334e-06	-11.3005	AT4G20440	0.00152216
BnaA04g04700D	5.19187e-06	-5.77588	AT3G53520	0.00153981
BnaC03g64840D	5.23231e-06	-8.53535	AT4G22130	0.00154285
BnaA08g13830D	5.24063e-06	-8.00809	AT4G28260	0.00154285
BnaCnng71920D	5.36916e-06	-3.89287	AT4G34160	0.00157489
BnaC02g33980D	5.62547e-06	-2.139	AT2G01540	0.00164405
BnaCnng43330D	5.7224e-06	-8.46864	AT3G63090	0.0016663
BnaA08g10490D	5.75637e-06	-4.18297	AT4G22860	0.00166836
BnaC03g66430D	5.77116e-06	-11.2004	AT4G33680	0.00166836
BnaA08g11370D	5.81422e-06	2.86406	AT4G34138	0.00167112
BnaC02g42020D	5.8297e-06	-3.30708	AT5G61140	0.00167112
BnaA08g04210D	5.8433e-06	6.44936	AT1G45230	0.00167112
BnaC02g47660D	5.88091e-06	-2.08555	AT2G01450	0.00167318
BnaA08g10890D	5.89228e-06	-7.41162	AT4G35070	0.00167318
BnaAnng41140D	6.05947e-06	-7.2099	AT5G61960	0.00171457
BnaC09g02630D	6.26825e-06	-5.71719	AT5G49230	0.0017674
BnaA07g14200D	6.29668e-06	-2.15646	AT5G37830	0.00176919
BnaC03g44910D	6.32583e-06	-3.138	AT3G21540	0.00177107
BnaA02g14660D	6.3476e-06	-4.38029	AT1G69250	0.00177107
BnaA08g06490D	6.4418e-06	3.24084	AT1G34190	0.00179111
BnaC03g63540D	6.51307e-06	-1.49683	AT4G20200	0.00180466
BnaC03g67000D	6.71272e-06	-7.14471	AT4G32700	0.00185357
BnaA08g10040D	6.90986e-06	3.31352	AT4G21850	0.00190145
BnaC03g76360D	6.97755e-06	-6.07252	AT4G39660	0.00190588
BnaA07g24990D	6.98581e-06	-8.09963	AT1G67490	0.00190588
BnaA08g02910D	6.99738e-06	3.80665	AT1G48960	0.00190588
BnaC02g44060D	7.22471e-06	-9.42389	AT4G39460	0.0019565
BnaC08g29630D	7.23209e-06	-4.4841	AT3G59140	0.0019565
BnaA08g07290D	7.52646e-06	3.06323	AT5G33290	0.00202928
BnaC04g15110D	7.72243e-06	2.16244	AT4G05510	0.00207513
BnaA02g15950D	7.88168e-06	-4.00155	AT1G72340	0.00210305
BnaC08g29370D	7.88845e-06	-8.88104	AT3G58660	0.00210305
BnaC08g08360D	7.9108e-06	-9.17148	AT4G14110	0.00210305
BnaC08g47830D	7.93139e-06	-3.14628	/	0.00210305
BnaC05g15980D	8.09217e-06	-3.31845	AT5G07740	0.0021386
BnaC02g33280D	8.40289e-06	-2.71827	AT5G47200	0.00221329
BnaC07g27800D	8.43005e-06	-3.81251	AT5G27330	0.00221329
BnaC09g21750D	8.5544e-06	-6.31788	AT4G05410	0.0022386
BnaA08g11360D	8.67477e-06	5.20399	AT4G34150	0.0022627
BnaC03g58150D	8.80238e-06	-8.07257	AT1G27850	0.00228853
BnaC03g04570D	9.44547e-06	-4.60502	AT5G10940	0.00244495
BnaC06g41970D	9.46508e-06	-4.64855	AT5G42480	0.00244495
BnaA04g20330D	9.71447e-06	-10.1382	AT2G34750	0.00249394
BnaAnng27600D	9.74108e-06	-9.87959	AT4G16510	0.00249394
BnaA08g30330D	9.74816e-06	-7.71122	AT4G16630	0.00249394
BnaC03g62020D	1.01192e-05	-3.20623	AT5G11250	0.00257454
BnaC09g04160D	1.01275e-05	-2.61493	AT5G25090	0.00257454
BnaA09g05660D	1.01601e-05	-3.47447	AT5G61330	0.00257466
BnaA08g03160D	1.02364e-05	1.93048	/	0.00258581
BnaA09g05840D	1.0319e-05	-3.24549	AT5G62000	0.00259848
BnaC03g64900D	1.04267e-05	-11.0158	AT4G12590	0.00261735
BnaC03g59840D	1.07476e-05	-8.09863	AT4G14300	0.00268948
BnaA08g03660D	1.08039e-05	4.27343	AT1G47740	0.00269516
BnaA08g02770D	1.08651e-05	-3.21601	AT1G49330	0.00270199
BnaC04g22450D	1.11237e-05	-3.44462	AT1G10120	0.00275774
BnaC03g61760D	1.20316e-05	-8.53138	AT4G36870	0.00297362
BnaC03g65910D	1.21055e-05	-12.4766	AT4G34640	0.00298267
BnaA08g03800D	1.22857e-05	-8.5967	AT1G47420	0.00301779
BnaA03g35750D	1.25437e-05	-2.4933	AT3G20370	0.00307046
BnaA08g05690D	1.25824e-05	-7.95364	AT4G15470	0.00307046
BnaA08g01150D	1.26151e-05	4.5641	AT1G53345	0.00307046
BnaA07g25020D	1.27414e-05	-2.21927	AT1G67420	0.0030918
BnaC09g06060D	1.27983e-05	-2.91736	AT5G63680	0.00309623
BnaA08g29920D	1.29192e-05	3.24905	AT2G06520	0.00311606
BnaAnng21080D	1.30408e-05	-8.47462	AT4G36760	0.00313593
BnaA02g33450D	1.30843e-05	-2.80423	AT5G62520	0.00313697
BnaA08g08850D	1.31799e-05	-4.69243	AT4G18550	0.00315047
BnaC03g76990D	1.33972e-05	6.14684	AT4G19870	0.00319287
BnaA05g20120D	1.35328e-05	-4.17382	AT3G20790	0.00321563
BnaC02g34070D	1.37522e-05	-1.54711	AT2G01630	0.00324891
BnaA08g11570D	1.3754e-05	-2.26488	AT4G03430	0.00324891
BnaC08g03540D	1.3824e-05	-2.28355	AT1G48480	0.00325121
BnaA08g06960D	1.38449e-05	10.0753	AT1G32200	0.00325121
BnaC04g31760D	1.40468e-05	-6.60785	AT5G39710	0.00328896
BnaA02g15970D	1.41472e-05	-1.88068	AT1G72390	0.0033028
BnaA08g06560D	1.42726e-05	8.80687	AT1G33980	0.00332241
BnaC03g76410D	1.46118e-05	-12.8757	AT2G21390	0.00339021
BnaA08g29720D	1.46486e-05	6.62288	AT1G42540	0.00339021
BnaC03g64660D	1.47705e-05	-4.84179	AT4G21865	0.0034015
BnaC05g31580D	1.48116e-05	-12.4638	AT5G07440	0.0034015
BnaCnng61650D	1.48248e-05	-2.5358	AT5G47500	0.0034015
BnaA03g16710D	1.54451e-05	-2.87536	AT2G36410	0.0035337
BnaA02g17730D	1.59941e-05	-5.05496	AT1G76810	0.00364888
BnaC03g51830D	1.66803e-05	-8.10219	AT5G62230	0.00379462
BnaA08g09140D	1.6813e-05	-9.27177	AT4G19200	0.00381397
BnaC09g03720D	1.7436e-05	-3.74367	AT5G26230	0.00394412
BnaC02g39570D	1.77356e-05	-1.99636	AT5G27120	0.00398995
BnaC03g65980D	1.77978e-05	-11.9013	AT4G34520	0.00398995
BnaC04g34800D	1.78015e-05	-4.43191	AT4G12750	0.00398995
BnaC05g08460D	1.78379e-05	-4.89401	AT1G11070	0.00398995
BnaCnng54350D	1.7972e-05	-1.76348	AT5G47890	0.00400797
BnaC03g60570D	1.80185e-05	-4.74052	AT4G39380	0.00400797
BnaA03g46830D	1.81326e-05	-3.70897	AT4G24620	0.00402217
BnaAnng34180D	1.82371e-05	-8.05148	AT4G32720	0.00403417
BnaA07g25010D	1.83845e-05	-2.44649	AT1G67430	0.00405557
BnaA02g12340D	1.88226e-05	-3.65121	AT1G66070	0.00414082
BnaA02g17360D	1.89399e-05	-3.76109	AT1G75670	0.00415521
BnaC03g61870D	1.9062e-05	-6.48994	AT4G36700	0.00417056
BnaA09g05560D	1.96417e-05	-2.92549	AT5G61000	0.00428568
BnaC02g39790D	1.96993e-05	-3.85219	AT5G27630	0.00428659
BnaA02g36030D	2.00779e-05	-3.49566	AT1G76180	0.00435712
BnaA08g11020D	2.03513e-05	-11.3632	AT4G34700	0.00440452
BnaA08g01030D	2.04438e-05	-7.74519	AT1G53710	0.00441261
BnaA08g22510D	2.08574e-05	-9.11384	AT1G18640	0.00447663
BnaA08g06090D	2.09386e-05	-8.2337	AT4G16143	0.00447663
BnaC03g63790D	2.09418e-05	-9.0636	AT4G20270	0.00447663
BnaC02g36310D	2.0964e-05	-8.51565	AT3G26744	0.00447663
BnaC03g32930D	2.10713e-05	-3.67792	AT3G02468	0.00448758
BnaA02g15820D	2.13094e-05	-2.85	AT1G72150	0.00452625
BnaC03g76140D	2.15813e-05	-10.0414	AT1G56070	0.00457187
BnaC02g33290D	2.17843e-05	-2.72178	AT5G47210	0.00460269
BnaAnng17780D	2.18748e-05	-2.60348	AT5G62620	0.00460965
BnaC08g10840D	2.19789e-05	-2.54033	AT4G17000	0.00461944
BnaA09g06200D	2.22503e-05	-3.80272	AT5G62710	0.0046603
BnaA02g14900D	2.22898e-05	-3.16823	AT1G70490	0.0046603
BnaC09g03410D	2.28689e-05	-4.01642	AT5G26910	0.00476895
BnaC03g64670D	2.30037e-05	-3.87072	AT4G21870	0.00478459
BnaC02g33480D	2.30988e-05	-3.65598	AT5G47730	0.00479192
BnaC02g32140D	2.33347e-05	-3.57569	AT5G46210	0.00482479
BnaC08g05480D	2.33777e-05	-8.75535	AT4G12760	0.00482479
BnaA03g08470D	2.34817e-05	-2.23175	AT5G22310	0.00483379
BnaC08g26240D	2.3546e-05	-6.6762	AT3G55430	0.00483459
BnaA09g05380D	2.40605e-05	-3.73982	AT5G23300	0.00492761
BnaAnng29860D	2.42684e-05	-7.17545	AT4G15410	0.00493136
BnaA08g04810D	2.42712e-05	5.35943	AT4G12760	0.00493136
BnaC03g08470D	2.43222e-05	-8.00721	AT5G17440	0.00493136
BnaA04g18680D	2.43252e-05	-2.24922	AT2G32300	0.00493136
BnaA05g09980D	2.49927e-05	-3.61767	AT2G33700	0.00505389
BnaA09g14240D	2.52357e-05	-2.79737	AT1G60390	0.00509018
BnaC04g04230D	2.54116e-05	-6.55504	AT2G45470	0.00511277
BnaA08g08790D	2.60194e-05	-7.11316	AT1G36280	0.00522194
BnaC02g08260D	2.61306e-05	-3.98815	AT5G18620	0.00523115
BnaC05g02730D	2.63991e-05	-12.3763	AT1G04690	0.00527172
BnaA04g05750D	2.67346e-05	-3.55893	AT3G52105	0.00532543
BnaA08g09410D	2.69282e-05	-3.97675	AT4G20380	0.00535069
BnaA09g05940D	2.7174e-05	-3.25242	AT5G62200	0.00538311
BnaC09g03700D	2.72258e-05	-3.83366	AT5G26260	0.00538311
BnaC09g03480D	2.76517e-05	-3.29599	AT5G26751	0.00545386
BnaC02g29360D	2.78925e-05	-5.07758	AT4G10030	0.00548783
BnaA08g13660D	2.80582e-05	-5.07409	AT4G28540	0.0055069
BnaA08g09020D	2.82001e-05	-8.99025	AT4G19100	0.0055118
BnaA09g06260D	2.82208e-05	-2.64356	AT3G48050	0.0055118
BnaA09g08160D	2.85513e-05	3.80179	AT5G65980	0.00556278
BnaA02g15680D	2.9003e-05	-2.39045	AT1G71950	0.00563707
BnaC02g27290D	2.91431e-05	-2.78445	AT4G02460	0.00565058
BnaA08g07100D	2.93097e-05	7.7088	AT5G35930	0.00566915
BnaA08g12180D	2.95325e-05	4.16015	AT4G32520	0.00569848
BnaC02g34010D	2.98384e-05	-1.45148	AT2G01600	0.00572095
BnaC08g36170D	2.98844e-05	-8.96714	AT2G20860	0.00572095
BnaC03g64590D	2.99603e-05	-7.66776	AT4G21810	0.00572095
BnaA09g17440D	3.00061e-05	2.97868	AT4G31700	0.00572095
BnaA08g05700D	3.00061e-05	-3.63235	AT4G15510	0.00572095
BnaAnng31540D	3.07122e-05	2.11015	AT4G29305	0.00584166
BnaA08g10030D	3.09279e-05	-5.37019	AT4G21810	0.00586593
BnaA09g05620D	3.09863e-05	-2.24084	AT5G61170	0.00586593
BnaC03g61880D	3.12252e-05	-8.54486	AT4G36690	0.00589722
BnaA08g04180D	3.15596e-05	3.45411	AT1G45545	0.00594634
BnaC07g48910D	3.17701e-05	-4.26168	AT1G12810	0.00597195
BnaCnng70380D	3.18501e-05	-2.99683	AT2G02060	0.00597297
BnaA04g04780D	3.21612e-05	-5.97466	AT3G53430	0.00601722
BnaC08g10600D	3.24884e-05	-6.53323	AT4G16265	0.00606427
BnaC02g15270D	3.2853e-05	-2.41278	AT5G52300	0.00610943
BnaC06g16630D	3.28829e-05	3.10689	AT3G58550	0.00610943
BnaA02g28060D	3.34722e-05	-5.80936	AT3G26420	0.00620452
BnaA06g26790D	3.35829e-05	-5.83313	AT5G24280	0.00621067
BnaA02g15730D	3.39159e-05	-2.68108	AT1G72040	0.00624466
BnaA10g07730D	3.39227e-05	-5.30118	AT5G51820	0.00624466
BnaA08g03990D	3.42532e-05	6.7315	AT1G47250	0.00629103
BnaA02g33120D	3.4349e-05	8.18943	AT5G62050	0.0062942
BnaA02g05230D	3.47536e-05	-1.65541	AT5G21100	0.0063538
BnaA10g04280D	3.49728e-05	-6.08447	AT1G06530	0.00637166
BnaA09g23090D	3.5049e-05	-5.96032	AT4G09650	0.00637166
BnaAnng19860D	3.51256e-05	-4.81605	/	0.00637166
BnaC07g23820D	3.51696e-05	-8.78783	AT3G26750	0.00637166
BnaA02g12050D	3.5273e-05	-2.72604	AT1G65290	0.00637596
BnaA02g18660D	3.59278e-05	-2.37675	AT1G77800	0.00647971
BnaC01g19120D	3.69516e-05	-3.07864	AT5G62370	0.00664937
BnaC03g71930D	3.79815e-05	-3.2387	AT2G32280	0.00681236
BnaA02g30710D	3.80275e-05	2.49201	AT5G49320	0.00681236
BnaA08g11560D	3.82596e-05	2.56321	AT4G33560	0.00683864
BnaC04g36290D	3.86424e-05	-5.82109	AT2G24580	0.0068716
BnaA09g52530D	3.87046e-05	-2.26309	AT5G66840	0.0068716
BnaC02g33420D	3.87791e-05	-3.05268	AT5G47660	0.0068716
BnaC02g39100D	3.87872e-05	-1.16669	/	0.0068716
BnaC02g12740D	3.95465e-05	-1.84017	AT5G55920	0.00699066
BnaC09g14020D	3.97675e-05	6.41861	AT1G61770	0.00699338
BnaA09g05930D	3.97975e-05	-5.59059	AT5G62190	0.00699338
BnaA09g06810D	3.98539e-05	3.10455	AT5G64350	0.00699338
BnaC02g13190D	3.99113e-05	-1.88777	AT5G55280	0.00699338
BnaC03g68230D	4.02451e-05	3.43474	AT5G63820	0.00703648
BnaAnng39720D	4.04116e-05	-1.76135	AT3G07890	0.0070502
BnaA02g14400D	4.06637e-05	-3.295	AT3G27740	0.00707876
BnaA02g14230D	4.09024e-05	-2.15529	AT1G69030	0.00710487
BnaA09g05920D	4.13362e-05	-7.26156	AT5G62180	0.00716467
BnaA04g06560D	4.15639e-05	-7.62806	AT4G13840	0.00718858
BnaC09g16100D	4.17297e-05	-2.87047	AT5G11020	0.00719901
BnaC03g63590D	4.18304e-05	-13.3707	AT4G19600	0.00719901
BnaA03g28800D	4.18939e-05	-4.64846	AT3G04820	0.00719901
BnaC07g30190D	4.22345e-05	3.19259	AT5G24270	0.007242
BnaC05g28330D	4.23343e-05	-5.34233	AT1G32900	0.0072436
BnaC02g23080D	4.35203e-05	-2.51088	AT5G51280	0.00743066
BnaCnng12820D	4.3913e-05	-3.7492	ATMG00516	0.00747135
BnaC09g02660D	4.39453e-05	-3.51321	AT5G49330	0.00747135
BnaC09g04130D	4.43472e-05	-3.74301	AT5G25150	0.00752371
BnaC09g04760D	4.46635e-05	1.75143	AT5G23660	0.00756134
BnaA08g09620D	4.57157e-05	-9.61291	AT4G21670	0.00772316
BnaA08g04050D	4.59901e-05	5.27389	AT1G47200	0.00775315
BnaA07g04390D	4.62334e-05	-5.73787	AT2G05920	0.00777781
BnaC02g34380D	4.63854e-05	-3.25229	AT2G02170	0.00778701
BnaA09g28480D	4.68731e-05	-7.25085	AT1G25375	0.00783811
BnaA02g35320D	4.69384e-05	2.66007	AT4G25810	0.00783811
BnaA08g03870D	4.7041e-05	-12.4888	AT1G80460	0.00783811
BnaA08g08580D	4.70813e-05	3.55123	AT4G18160	0.00783811
BnaA07g25080D	4.72154e-05	-4.99216	AT1G67325	0.00784413
BnaC04g32860D	4.74993e-05	-6.11521	AT5G40770	0.00787495
BnaA08g14640D	4.77263e-05	-7.57266	AT4G24770	0.00789624
BnaA02g17480D	4.82939e-05	-2.14517	AT1G75800	0.00797368
BnaA02g03550D	4.84909e-05	3.717	AT5G17350	0.00798972
BnaA09g36350D	4.86942e-05	-4.38689	AT3G57000	0.00800674
BnaA01g05180D	4.98467e-05	-2.93734	AT3G44980	0.00817946
BnaC02g42120D	5.01634e-05	-2.63351	AT5G61220	0.00820611
BnaC06g19090D	5.02141e-05	-6.24068	AT1G80300	0.00820611
BnaA08g04270D	5.03915e-05	-3.81224	AT4G36070	0.00821833
BnaC09g04380D	5.09584e-05	-4.04397	AT5G24470	0.008279
BnaC03g62400D	5.09703e-05	-5.79274	AT4G35630	0.008279
BnaAnng09900D	5.16821e-05	-2.96864	/	0.00836126
BnaC04g19280D	5.16855e-05	-3.89283	AT1G62085	0.00836126
BnaC04g00550D	5.18095e-05	-5.03528	AT2G46915	0.00836442
BnaC03g64270D	5.20844e-05	-3.55238	/	0.0083789
BnaA08g09850D	5.21323e-05	-8.62363	AT4G21090	0.0083789
BnaA02g15340D	5.22132e-05	-2.77877	AT1G71070	0.0083789
BnaC09g02310D	5.30749e-05	-2.75	AT5G48240	0.00850015
BnaC03g76270D	5.37551e-05	-5.06043	AT4G39740	0.00857678
BnaA07g30190D	5.37675e-05	-5.33209	AT1G72440	0.00857678
BnaAnng23050D	5.4295e-05	2.01101	AT4G30270	0.00864369
BnaA10g13540D	5.46301e-05	-5.68116	AT5G60710	0.00866298
BnaC02g36390D	5.46325e-05	-3.41326	AT5G14030	0.00866298
BnaC03g63960D	5.50998e-05	-2.19064	AT4G20890	0.00871966
BnaC02g39000D	5.52077e-05	4.72597	AT5G49320	0.00871966
BnaC05g26530D	5.5644e-05	4.04082	/	0.00876315
BnaC08g34250D	5.57019e-05	-2.17388	AT2G24100	0.00876315
BnaC09g49440D	5.60874e-05	2.02452	AT5G05965	0.00880145
BnaC06g42920D	5.61652e-05	-6.87834	AT3G61560	0.00880145
BnaA04g04690D	5.63869e-05	-1.98305	AT3G53540	0.00881894
BnaC02g42030D	5.67356e-05	-3.40719	AT5G61140	0.00885617
BnaA08g08980D	5.70346e-05	-8.67334	AT4G19006	0.00888552
BnaC08g49240D	5.7365e-05	-11.971	AT4G39280	0.00891964
BnaC04g32770D	5.76507e-05	-1.85502	AT5G40640	0.0089467
BnaC08g07800D	5.82774e-05	-2.50942	AT1G32150	0.00902646
BnaC09g10310D	5.86651e-05	-2.84845	AT2G20250	0.00906896
BnaC03g61350D	5.90134e-05	-5.19583	AT4G37590	0.00908377
BnaA08g13960D	5.90734e-05	-3.24071	AT4G27940	0.00908377
BnaA08g17670D	5.91012e-05	-8.26278	AT1G29850	0.00908377
BnaC05g02750D	5.96094e-05	-8.0505	AT1G50920	0.00911903
BnaA07g24970D	5.96493e-05	-3.46955	AT1G57820	0.00911903
BnaC08g47550D	5.96722e-05	-1.97304	AT1G72730	0.00911903
BnaA04g04210D	6.03915e-05	-8.11995	AT3G54250	0.00921137
BnaC09g37590D	6.05331e-05	-6.91325	AT5G20190	0.00921541
BnaA08g14490D	6.08241e-05	3.88531	AT4G26080	0.00924215
BnaCnng07040D	6.13492e-05	0.981165	AT3G21710	0.00930428
BnaC02g34060D	6.1508e-05	-1.60619	AT2G01620	0.0093077
BnaC05g02100D	6.16042e-05	-2.66125	AT1G03820	0.0093077
BnaC04g32410D	6.2013e-05	-3.20243	AT3G09120	0.00935181
BnaC03g59440D	6.2294e-05	-7.50538	AT1G29750	0.00937653
BnaA08g30740D	6.24257e-05	-3.89175	AT4G29010	0.00937874
BnaC01g30120D	6.28844e-05	-4.17624	AT1G79540	0.00941118
BnaC05g10550D	6.30897e-05	-10.2719	AT1G14320	0.00941118
BnaC01g03250D	6.31166e-05	-4.78191	AT4G35300	0.00941118
BnaA02g09490D	6.33341e-05	2.28037	AT5G54690	0.00941118
BnaA08g17360D	6.33441e-05	4.80332	AT3G28980	0.00941118
BnaA09g22460D	6.33469e-05	-5.57226	AT4G10620	0.00941118
BnaC06g05490D	6.3494e-05	3.37848	AT4G19540	0.00941557
BnaA08g15870D	6.36649e-05	-6.49174	AT4G37910	0.00942347
BnaC05g15140D	6.40314e-05	-3.95847	/	0.0094459
BnaA06g40110D	6.40524e-05	-9.98112	AT5G47360	0.0094459
BnaC08g28300D	6.55123e-05	-4.02027	AT3G57360	0.00964344
BnaAnng31420D	6.61876e-05	0.782824	AT3G03470	0.00972497
BnaC02g42130D	6.64177e-05	3.8454	AT5G61240	0.00974089
BnaUnng04840D	6.74176e-05	-1.77911	/	0.00986947
BnaA07g24500D	6.77158e-05	-5.40565	AT1G68680	0.00989504
BnaA10g23250D	6.79731e-05	-3.70592	AT5G08110	0.00991137
BnaC03g68820D	6.80751e-05	-5.16099	AT1G51380	0.00991137
BnaC07g30500D	6.86681e-05	-9.38466	AT5G23890	0.00996655
BnaC04g13440D	6.87031e-05	-2.18963	/	0.00996655
BnaC03g63420D	6.92517e-05	-7.30783	AT4G19830	0.010028
BnaC02g39190D	7.01944e-05	-2.26692	AT5G49580	0.0101461
BnaA02g32760D	7.03574e-05	3.19024	AT1G45100	0.0101514
BnaC05g37790D	7.04888e-05	-6.07335	AT5G11200	0.010152
BnaC09g03440D	7.10247e-05	-2.43302	AT5G26850	0.0102109
BnaA06g19860D	7.21351e-05	-5.43717	AT3G45780	0.0103519
BnaC03g61560D	7.23483e-05	2.04081	AT5G31412	0.0103639
BnaC08g35690D	7.26918e-05	-5.26633	AT2G21440	0.0103659
BnaC02g32010D	7.27019e-05	-1.4429	AT5G45960	0.0103659
BnaA07g21640D	7.27506e-05	2.71745	AT1G75540	0.0103659
BnaC02g42350D	7.30941e-05	-2.36089	AT5G62890	0.0103964
BnaC08g35050D	7.3245e-05	-8.93362	AT2G22475	0.0103994
BnaA05g35660D	7.34085e-05	-3.39543	AT1G52740	0.0104041
BnaA08g02520D	7.36129e-05	6.75956	AT1G49740	0.0104147
BnaC09g12140D	7.39578e-05	3.16571	/	0.0104363
BnaA08g30760D	7.40266e-05	-5.41309	AT4G28730	0.0104363
BnaC03g74310D	7.45057e-05	-11.7287	AT2G05320	0.0104813
BnaC08g36190D	7.46075e-05	-10.7735	AT2G20830	0.0104813
BnaC04g55460D	7.48249e-05	-6.84507	AT3G57560	0.0104934
BnaCnng22770D	7.56006e-05	-6.03938	AT2G17265	0.0105837
BnaA08g02960D	7.69207e-05	7.87524	AT1G48880	0.0107497
BnaC02g47650D	7.71519e-05	-1.8082	AT2G01430	0.0107632
BnaA05g17360D	7.77347e-05	-2.2051	AT3G05650	0.0108257
BnaA02g14310D	7.79968e-05	-2.3363	AT1G69420	0.0108433
BnaA03g57280D	7.87388e-05	2.47554	AT1G56220	0.0109275
BnaA04g29080D	7.95464e-05	-1.78861	AT2G35040	0.0110205
BnaA08g15320D	8.03315e-05	-5.28376	AT1G63810	0.01111
BnaA07g28490D	8.15266e-05	-4.64438	AT1G69950	0.0112559
BnaA08g10910D	8.19118e-05	-2.21356	AT4G35060	0.0112896
BnaC02g26450D	8.33155e-05	-4.35992	AT5G24590	0.0114611
BnaA05g20990D	8.37162e-05	-5.1629	AT3G19210	0.0114611
BnaC06g21270D	8.37271e-05	-8.4183	AT4G01090	0.0114611
BnaA02g14020D	8.37284e-05	-3.34686	AT1G68820	0.0114611
BnaA09g47170D	8.40559e-05	-3.70954	AT1G12380	0.0114863
BnaA03g09360D	8.43041e-05	1.54468	AT5G60180	0.0115005
BnaA02g33200D	8.44886e-05	-4.90964	AT5G62150	0.0115021
BnaC02g33760D	8.46027e-05	-2.10776	AT2G01250	0.0115021
BnaC02g31030D	8.50705e-05	-2.11645	AT5G44340	0.0115461
BnaC02g34370D	8.6039e-05	-2.03071	AT2G02160	0.0116578
BnaC03g68260D	8.64363e-05	3.7279	AT4G29830	0.0116918
BnaA02g17350D	8.70467e-05	-2.22744	AT1G75660	0.0117367
BnaC02g23220D	8.7061e-05	-6.19718	AT1G80280	0.0117367
BnaA04g29260D	8.86207e-05	-8.0814	AT2G39280	0.0119269
BnaC05g49730D	8.91429e-05	-4.35694	AT1G14340	0.011977
BnaA10g04660D	8.93382e-05	-3.53348	AT1G07210	0.0119831
BnaC03g75860D	8.97517e-05	-8.86353	AT1G24510	0.0120023
BnaA09g21320D	8.97811e-05	-4.12007	AT4G11850	0.0120023
BnaA02g12550D	9.02559e-05	-3.93663	AT1G66740	0.0120457
BnaC07g41690D	9.04664e-05	-2.24508	AT4G29020	0.0120537
BnaC05g35160D	9.10223e-05	-8.42584	AT3G18190	0.01209
BnaA02g17110D	9.1041e-05	-3.2258	AT1G75060	0.01209
BnaC04g23460D	9.29149e-05	-5.2335	AT3G58660	0.0123185
BnaA08g17640D	9.31989e-05	-2.85807	AT1G29952	0.0123357
BnaC02g18560D	9.34003e-05	-2.03059	AT1G53250	0.0123419
BnaA02g17550D	9.35742e-05	-3.48298	AT1G75840	0.0123446
BnaA06g04970D	9.40228e-05	-3.13164	AT1G08580	0.0123729
BnaA08g07440D	9.40981e-05	3.61151	AT5G37340	0.0123729
BnaC08g23490D	9.45009e-05	-6.52555	AT3G52180	0.0124055
BnaA07g13810D	9.48944e-05	-1.88908	AT2G28330	0.0124368
BnaA02g36270D	9.59449e-05	-2.18306	AT1G80750	0.0125539
BnaA10g02860D	9.62454e-05	-2.55112	AT1G04700	0.0125727
BnaA06g14500D	9.73798e-05	-5.81607	AT1G20610	0.0127001
BnaC03g77620D	9.7941e-05	-4.98487	AT2G25160	0.0127352
BnaA03g35240D	9.7967e-05	-3.74321	AT3G19360	0.0127352
BnaCnng54360D	9.916e-05	-3.09932	AT1G65520	0.0128628
BnaC08g29640D	9.92692e-05	-3.92553	AT3G59140	0.0128628
BnaA09g06220D	9.94758e-05	-3.34393	AT5G62770	0.0128687
BnaCnng12780D	9.96636e-05	-4.31192	ATMG00160	0.0128722
BnaUnng01990D	0.000100054	-4.51768	/	0.0128917
BnaA02g08110D	0.000100137	1.8935	AT5G57400	0.0128917
BnaA08g08220D	0.000102117	2.14543	AT4G17085	0.0131255
BnaA08g05550D	0.000102805	4.1548	AT4G14965	0.0131911
BnaC01g04400D	0.000103025	-3.11567	AT4G33925	0.0131911
BnaAnng26830D	0.000103121	3.451	/	0.0131911
BnaAnng08880D	0.000103287	-7.14381	AT4G13850	0.0131913
BnaC02g39840D	0.000103677	-3.07897	AT5G27740	0.01322
BnaA06g24920D	0.000104089	-7.70604	AT5G67610	0.0132514
BnaA08g00930D	0.00010453	3.83269	AT1G54080	0.0132788
BnaC04g10230D	0.00010467	-10.1211	AT2G35120	0.0132788
BnaC03g77250D	0.000104899	5.24485	/	0.0132788
BnaC02g37270D	0.000104968	-3.24271	AT5G13930	0.0132788
BnaC02g29900D	0.000105936	-4.58451	/	0.0133707
BnaA09g06030D	0.000106028	-2.35959	AT5G62360	0.0133707
BnaC01g36680D	0.000106362	-4.1722	AT3G14660	0.013373
BnaCnng15760D	0.000106495	-9.01697	AT5G63220	0.013373
BnaC03g62580D	0.000106547	-13.8451	AT4G35830	0.013373
BnaC07g26500D	0.00010676	-5.25811	AT5G48480	0.0133787
BnaC02g47130D	0.000107298	-2.81398	AT5G46110	0.0134252
BnaC03g61260D	0.000108369	-7.97487	AT4G38550	0.013538
BnaA06g13880D	0.000108607	-6.20617	AT1G19715	0.0135466
BnaC04g34870D	0.000109382	-5.2444	AT2G36380	0.013622
BnaC09g49130D	0.000110964	-3.03671	AT3G11710	0.0137977
BnaC03g76830D	0.000111547	2.68582	AT1G36280	0.0138486
BnaC03g61570D	0.000111994	1.90669	AT2G11950	0.0138826
BnaA08g06760D	0.000112284	5.8021	AT1G32700	0.0138901
BnaC03g65000D	0.000112448	-5.40924	AT4G22550	0.0138901
BnaC03g58120D	0.000112575	-6.07441	AT1G27752	0.0138901
BnaC02g32200D	0.000112942	-2.65886	AT5G46280	0.013914
BnaCnng16950D	0.000113513	-3.98263	AT1G23490	0.0139628
BnaA09g54630D	0.000113963	-6.29405	AT1G23980	0.0139967
BnaA07g26180D	0.000114605	5.44079	AT5G09730	0.0140274
BnaC05g35500D	0.000114685	-5.27874	AT3G18000	0.0140274
BnaC08g08150D	0.000114933	-14.2869	AT5G33320	0.0140274
BnaA06g21690D	0.000115069	-6.34737	AT5G62230	0.0140274
BnaA09g06240D	0.00011509	-3.13707	AT5G62810	0.0140274
BnaA03g07880D	0.000116612	-5.93844	AT5G20070	0.0141914
BnaC07g23370D	0.000117483	3.40327	AT3G26165	0.0142704
BnaC04g25710D	0.000117617	-10.4943	AT3G55140	0.0142704
BnaCnng35910D	0.000119579	2.23266	AT1G32170	0.0144864
BnaC02g29130D	0.000119895	-2.27	AT4G10450	0.0145027
BnaA10g17210D	0.000120558	-2.36255	AT5G17520	0.0145609
BnaA09g06120D	0.000121132	-3.12491	AT5G62560	0.0146048
BnaA08g08180D	0.000121285	-6.53177	AT4G17060	0.0146048
BnaA09g54560D	0.000122069	-7.4556	AT1G23820	0.0146666
BnaA08g14050D	0.000122432	-3.5397	AT4G27595	0.0146666
BnaC03g23120D	0.000122524	1.90928	AT2G41080	0.0146666
BnaC09g02680D	0.000122532	-2.55762	AT5G49360	0.0146666
BnaA02g15960D	0.000122846	-1.25466	AT1G72370	0.0146823
BnaA02g26930D	0.000123237	1.9697	AT2G01430	0.0147071
BnaA02g09070D	0.000123454	2.2678	AT5G55370	0.014711
BnaA07g03050D	0.000123693	-4.00448	AT2G17820	0.0147176
BnaA02g12280D	0.000123971	-2.47642	AT1G65840	0.0147186
BnaA09g49840D	0.000124069	-4.65552	AT1G06590	0.0147186
BnaA06g32910D	0.000124436	-3.75533	AT3G26420	0.0147404
BnaA05g35000D	0.000124648	-4.4875	AT1G56200	0.0147437
BnaA09g16350D	0.000125083	-9.76273	AT5G43280	0.0147732
BnaC09g27760D	0.000125841	2.6478	AT5G40570	0.0148247
BnaC08g37350D	0.000125889	-4.42652	AT3G17900	0.0148247
BnaA10g29620D	0.000126115	-2.30595	AT5G59980	0.0148296
BnaC02g47560D	0.000126902	-3.28585	AT5G47050	0.0148917
BnaC04g40710D	0.000127263	-3.42446	AT2G29670	0.0148917
BnaA02g35620D	0.000127263	-1.75491	AT1G72220	0.0148917
BnaA02g33080D	0.000127388	-6.0053	AT5G61960	0.0148917
BnaA03g04300D	0.000127889	-3.24227	AT5G13360	0.0149286
BnaC05g21950D	0.000129493	-5.11497	AT1G28580	0.0150937
BnaC07g15670D	0.000130196	2.64185	AT3G10180	0.0151537
BnaA02g12440D	0.000130796	-2.20207	AT1G66250	0.0152014
BnaA10g28370D	0.000131345	-6.76208	AT5G52540	0.0152431
BnaA04g20940D	0.000131897	-10.4491	AT1G56070	0.015285
BnaA02g05990D	0.000132409	-3.49413	AT5G22860	0.0153221
BnaC03g68780D	0.000132698	-2.81284	AT1G51405	0.0153334
BnaA08g07370D	0.00013304	6.78152	AT5G32470	0.0153383
BnaA05g29440D	0.000133236	-4.1615	AT2G03460	0.0153383
BnaCnng50660D	0.000133315	-3.96442	AT3G17465	0.0153383
BnaCnng75420D	0.000133693	-1.80569	AT2G21410	0.0153598
BnaA08g23810D	0.000135821	-6.48814	AT1G15500	0.0155812
BnaCnng22230D	0.00013601	-1.91853	AT2G01490	0.0155812
BnaA02g33320D	0.000136468	5.63825	AT5G62260	0.0156052
BnaA07g25060D	0.000136609	-4.23146	AT1G67340	0.0156052
BnaC03g66830D	0.000137422	5.72108	AT4G32950	0.0156758
BnaC02g33470D	0.000138609	-3.70702	AT5G47710	0.0157791
BnaA03g28700D	0.000139006	-3.30091	AT3G04630	0.0157791
BnaC03g36250D	0.000139028	-5.76724	AT3G09190	0.0157791
BnaA07g24550D	0.000139117	-6.82806	AT1G68580	0.0157791
BnaC09g17360D	0.000139586	-2.35316	AT1G23310	0.01581
BnaA05g16570D	0.000139897	-2.29169	/	0.0158172
BnaA10g17100D	0.000140045	-5.12347	AT5G17630	0.0158172
BnaC09g01370D	0.000140619	-2.72408	AT3G27240	0.0158597
BnaA08g05570D	0.000141265	-7.72495	AT4G15000	0.0159101
BnaA07g05960D	0.000141975	-3.30708	AT3G24110	0.0159677
BnaC06g22310D	0.000146368	3.23903	AT1G75540	0.0164386
BnaAnng29160D	0.000146884	-5.47942	AT3G59630	0.0164734
BnaC02g31570D	0.00014712	-2.23822	AT5G45410	0.0164768
BnaC02g33250D	0.000147816	-3.11908	AT5G47150	0.0165199
BnaC09g08360D	0.000147917	5.5898	AT5G65980	0.0165199
BnaA02g16510D	0.000148814	-3.7228	AT1G73650	0.0165969
BnaA08g08340D	0.000149779	-9.08859	AT4G17530	0.0166531
BnaC02g34080D	0.00014993	-3.16133	AT2G01640	0.0166531
BnaC08g13010D	0.000150113	-6.08918	AT4G28350	0.0166531
BnaCnng21330D	0.000150149	-2.26606	AT1G53330	0.0166531
BnaC05g28320D	0.000150959	-5.24666	AT1G32900	0.0166716
BnaA02g13350D	0.000151097	-2.68843	AT1G67785	0.0166716
BnaA08g29500D	0.000151122	-5.67994	AT4G12750	0.0166716
BnaC03g33200D	0.000151149	-1.48714	AT4G16080	0.0166716
BnaA07g12270D	0.00015215	1.87409	AT5G66900	0.0167497
BnaC02g29260D	0.000152411	-3.64487	AT2G29550	0.0167497
BnaC07g28600D	0.000152539	-7.84388	AT5G26600	0.0167497
BnaC02g48770D	0.000152694	-4.27873	AT5G23630	0.0167497
BnaCnng65700D	0.000153295	-1.81825	AT5G19290	0.0167926
BnaA09g44590D	0.000154092	3.94909	AT1G18390	0.016837
BnaC03g25340D	0.000154121	-4.25105	AT1G10270	0.016837
BnaC06g41800D	0.000155142	-0.368572	AT4G14220	0.0169254
BnaC08g12780D	0.000155373	-3.1366	/	0.0169277
BnaC09g03760D	0.000155802	-4.22983	AT5G26210	0.0169513
BnaAnng36070D	0.000156042	-3.81638	AT3G21690	0.0169544
BnaA02g15640D	0.00015672	-1.95701	AT1G71900	0.0169853
BnaA03g40010D	0.000156751	-4.84529	AT3G62200	0.0169853
BnaC03g63340D	0.000157579	-6.16109	AT4G19870	0.0170519
BnaC02g13450D	0.000157924	4.10171	AT3G02020	0.0170662
BnaA02g14180D	0.000158436	-3.26235	AT1G68920	0.0170985
BnaC05g10580D	0.000160016	-3.15098	AT1G14350	0.0172457
BnaC05g51730D	0.000160358	-5.07493	AT3G22550	0.0172594
BnaC09g03040D	0.000161326	-1.3577	AT5G27220	0.0173402
BnaCnng03750D	0.000162308	3.05592	/	0.0174029
BnaA07g26450D	0.000162344	-3.7288	AT1G65030	0.0174029
BnaAnng05360D	0.000162619	-8.65943	AT5G44860	0.0174091
BnaA06g23870D	0.000164501	-6.47814	AT5G64940	0.0175871
BnaA09g04510D	0.000164936	-3.16356	AT5G25620	0.0176101
BnaC09g22750D	0.000165206	-4.57658	AT4G04614	0.0176155
BnaC02g13200D	0.000165656	-2.36174	AT5G55230	0.0176264
BnaC01g03230D	0.000165749	-2.20325	AT4G35320	0.0176264
BnaC03g61270D	0.000168117	-4.51202	AT4G37750	0.0178424
BnaA02g22060D	0.000168226	0.933323	AT4G28300	0.0178424
BnaCnng04620D	0.000169374	-5.36858	AT1G25510	0.0179405
BnaC02g12710D	0.000169833	-1.67869	AT5G55990	0.0179653
BnaAnng39000D	0.000170096	4.62613	AT3G01300	0.0179693
BnaA03g49250D	0.000171551	-1.14246	AT4G28410	0.0180847
BnaC09g21130D	0.00017164	-5.27389	AT1G65840	0.0180847
BnaUnng00270D	0.000172013	-10.0307	AT4G10320	0.0180939
BnaA07g30080D	0.000172179	-5.70784	AT1G72320	0.0180939
BnaC02g41630D	0.000172901	-3.93081	AT5G23440	0.018146
BnaA02g14990D	0.000174614	-1.55243	AT1G70560	0.0182897
BnaC07g48130D	0.000174728	-7.52953	AT2G18000	0.0182897
BnaA02g17410D	0.000176333	-1.56173	AT1G75710	0.0184321
BnaAnng06380D	0.000176548	1.16561	AT5G07680	0.0184321
BnaA09g33880D	0.000178001	-5.04529	AT3G53630	0.0185222
BnaA03g58190D	0.000178079	-3.19462	AT4G18570	0.0185222
BnaCnng02730D	0.000178105	-4.23619	AT5G03540	0.0185222
BnaA03g31390D	0.000178888	-1.54834	AT4G30660	0.0185795
BnaA02g12760D	0.000179696	-2.40812	AT1G67040	0.0186225
BnaA08g10930D	0.00017998	-8.67719	AT4G34960	0.0186225
BnaC01g19570D	0.00018	-2.95212	AT5G51820	0.0186225
BnaC09g02280D	0.00018159	-2.33513	AT5G48160	0.0187628
BnaA08g02920D	0.000182295	7.23255	AT1G48950	0.0188114
BnaC02g47770D	0.000183192	-1.86329	AT2G01820	0.0188702
BnaC09g37880D	0.000183337	-6.84772	AT5G19780	0.0188702
BnaA09g12550D	0.000185064	-3.19452	AT1G63250	0.019009
BnaA05g03710D	0.000185584	-1.54473	AT2G44065	0.019009
BnaC07g16080D	0.000185587	-5.0921	AT5G67260	0.019009
BnaA09g05810D	0.000185634	-2.35768	AT5G61790	0.019009
BnaCnng59700D	0.000186281	-6.75534	AT3G15030	0.0190509
BnaCnng72890D	0.000186538	-11.4984	AT4G22670	0.0190528
BnaA04g05740D	0.000186816	-6.90502	AT3G52110	0.0190569
BnaA08g05240D	0.000187441	5.17307	AT1G30810	0.0190963
BnaC09g13180D	0.000188196	5.25197	AT1G63350	0.019144
BnaA08g13850D	0.000188387	-7.35479	AT4G28200	0.019144
BnaCnng21480D	0.000189145	-12.5274	/	0.0191967
BnaCnng17380D	0.000189767	-2.99058	AT4G39740	0.0192354
BnaCnng45920D	0.000191213	-5.91596	AT1G48920	0.0193422
BnaC07g49960D	0.000191304	5.63799	/	0.0193422
BnaC02g39200D	0.000191698	-3.08336	AT5G49580	0.0193576
BnaA05g11650D	0.00019223	-2.39509	AT2G31070	0.0193697
BnaC08g36200D	0.000192301	-9.7496	AT2G20820	0.0193697
BnaC09g04330D	0.000193465	-4.51938	AT5G24590	0.0194388
BnaC03g66680D	0.000193473	-3.66982	AT4G33330	0.0194388
BnaA02g18530D	0.000193896	-3.89461	AT1G77140	0.0194569
BnaC02g34200D	0.000194421	-3.71728	AT3G08650	0.0194851
BnaA06g04200D	0.000195243	-1.94466	AT1G07770	0.0195431
BnaA08g08070D	0.000198315	-4.27139	AT1G31070	0.0198258
BnaA07g37280D	0.000199056	-6.04637	AT1G21380	0.0198648
BnaC02g39140D	0.000199201	-1.77869	AT5G01445	0.0198648
BnaC05g01160D	0.00019949	-4.14584	AT1G02370	0.0198689
BnaA02g35840D	0.000200146	-2.01567	AT1G70180	0.0199015
BnaA08g14310D	0.000200315	-6.48915	AT4G26760	0.0199015
BnaC02g40890D	0.000200696	-3.32582	AT5G25050	0.0199147
BnaA09g06740D	0.000201064	-2.21556	AT5G64180	0.0199265
BnaA07g10750D	0.00020195	-7.70894	AT1G02090	0.0199682
BnaC05g12520D	0.000201984	1.95056	AT1G16410	0.0199682
BnaA06g22480D	0.000203514	-5.97379	AT5G63010	0.0200947
BnaC02g34810D	0.000203864	-2.78252	AT2G02820	0.0201045
BnaA08g11440D	0.00020566	-4.76846	AT4G33790	0.0202567
BnaC03g37500D	0.000205984	-7.82766	AT3G12290	0.0202636
BnaCnng35810D	0.000206322	-9.097	AT2G42910	0.0202719
BnaA04g29090D	0.00020683	-1.4552	AT2G35040	0.0202969
BnaA03g47570D	0.000207705	-1.50279	AT4G25630	0.0203578
BnaC03g44800D	0.000208114	-7.07949	AT3G24660	0.0203731
BnaC09g02170D	0.000208608	-3.24386	AT3G30180	0.0203965
BnaA09g17250D	0.000209613	-6.2332	AT1G80500	0.0204697
BnaC08g12580D	0.000210789	-2.73482	AT4G27652	0.0205401
BnaC08g24760D	0.000210847	-11.1338	AT3G53750	0.0205401
BnaA03g51370D	0.000211111	-4.48941	AT4G31210	0.0205408
BnaA02g14110D	0.000211467	-1.14747	AT1G68890	0.0205441
BnaC04g08700D	0.000211707	-2.96046	AT2G36620	0.0205441
BnaCnng72860D	0.000211913	-1.89465	AT1G72730	0.0205441
BnaC09g50930D	0.000213582	-4.49815	AT5G62790	0.0206807
BnaA06g26740D	0.000214352	-5.60104	AT5G24170	0.0207303
BnaC08g20950D	0.000215215	-2.06681	AT3G49260	0.0207886
BnaC07g48250D	0.000215732	2.87368	AT2G27670	0.0208134
BnaC01g29930D	0.000216832	-2.23651	AT1G61800	0.0208769
BnaA09g24740D	0.000216954	-5.40954	AT1G31860	0.0208769
BnaA07g24980D	0.000217614	-3.29418	AT1G67500	0.0208769
BnaC02g47720D	0.000217663	-1.69884	AT2G01710	0.0208769
BnaAnng09830D	0.000217694	6.0122	/	0.0208769
BnaC08g44500D	0.00021878	3.01709	AT1G05950	0.0209193
BnaCnng29620D	0.000218954	-10.4878	AT1G26110	0.0209193
BnaA08g07270D	0.000219391	7.08278	AT5G34850	0.0209193
BnaA09g05550D	0.000219617	-2.83818	AT5G60980	0.0209193
BnaC03g75530D	0.00021983	1.67097	AT1G14610	0.0209193
BnaA07g11960D	0.000219944	-5.58739	AT5G67280	0.0209193
BnaC08g39740D	0.000219964	0.886381	AT1G13300	0.0209193
BnaC03g70280D	0.000220862	-3.42148	AT1G55200	0.0209798
BnaC02g28870D	0.000222678	-2.76241	AT4G11160	0.0211272
BnaC09g02330D	0.000223164	-1.87085	AT5G03780	0.0211483
BnaC08g46530D	0.000224072	-2.57826	AT1G44800	0.0212092
BnaC02g33700D	0.000224543	-2.03726	AT2G01170	0.0212288
BnaA04g03470D	0.000225248	-3.62648	AT3G55605	0.0212493
BnaC03g60110D	0.000225291	-6.22846	AT4G38650	0.0212493
BnaC03g63650D	0.000225606	-6.46918	AT4G20040	0.0212518
BnaC02g13210D	0.000225861	-1.56698	AT5G55220	0.0212518
BnaC05g23500D	0.000226114	-2.52976	AT1G30515	0.0212518
BnaC08g22580D	0.000226719	-7.87745	AT3G51160	0.021264
BnaA07g25180D	0.000227033	-4.93991	AT1G64980	0.021264
BnaA09g13630D	0.000227041	-5.3789	AT1G61730	0.021264
BnaA03g06930D	0.000227494	-3.4154	AT5G18180	0.02128
BnaC04g39470D	0.000227743	-2.42884	/	0.02128
BnaC02g32570D	0.000229731	-3.3397	AT5G46630	0.0214408
BnaC02g42300D	0.000230454	-5.42874	AT5G62820	0.0214832
BnaA02g12790D	0.000231452	-2.12789	AT1G67070	0.0215512
BnaA08g29820D	0.00023247	-6.51555	AT4G13350	0.0216021
BnaA03g29120D	0.000232539	-8.40365	AT3G05670	0.0216021
BnaA02g36050D	0.000233289	-2.94651	AT1G77740	0.0216295
BnaC02g41800D	0.000233374	-2.80315	AT5G08130	0.0216295
BnaA08g09760D	0.000233733	-3.26746	AT4G21215	0.0216377
BnaC02g33640D	0.000234253	-2.38274	AT2G01110	0.0216608
BnaA07g28600D	0.000235392	-5.81262	AT1G70090	0.0217209
BnaC02g30770D	0.000235618	-3.53678	AT5G44070	0.0217209
BnaA02g12890D	0.000235716	-3.34686	AT5G40480	0.0217209
BnaA08g15450D	0.000237507	-4.18478	AT4G36870	0.0218517
BnaA04g07120D	0.000237682	-7.0828	AT4G13050	0.0218517
BnaC05g17340D	0.000238553	-2.82004	AT1G22030	0.0219041
BnaA06g32880D	0.000238799	-1.78086	AT3G26490	0.0219041
BnaA08g02390D	0.000239504	4.80107	AT1G49600	0.021907
BnaA09g46280D	0.000239548	0.701975	AT5G03495	0.021907
BnaUnng02990D	0.000239651	-10.6696	AT1G24050	0.021907
BnaA03g58880D	0.000240493	-7.4965	AT4G29040	0.0219589
BnaC01g01990D	0.000241442	-2.91858	AT4G37240	0.0220205
BnaC03g64790D	0.000242335	2.7385	AT4G22100	0.0220584
BnaCnng13940D	0.000242643	-4.03517	AT5G56300	0.0220584
BnaA02g33110D	0.000243155	-5.17296	AT5G61980	0.0220584
BnaA08g30350D	0.000243263	-10.0737	AT4G16650	0.0220584
BnaC07g50630D	0.000243421	-6.05427	AT4G28190	0.0220584
BnaC02g34690D	0.000243511	-1.71775	AT2G02560	0.0220584
BnaA09g23220D	0.00024407	-1.37092	AT3G27060	0.0220841
BnaA09g54860D	0.000246639	-9.13688	AT3G55050	0.0222774
BnaC02g42150D	0.000246763	-3.10027	/	0.0222774
BnaC02g33260D	0.000249532	-2.73203	AT5G47150	0.0224895
BnaC01g28560D	0.000249796	-3.46369	AT5G62190	0.0224895
BnaA07g00390D	0.000249955	3.73409	AT5G48930	0.0224895
BnaA08g12080D	0.000250409	2.55827	AT3G26560	0.022505
BnaA03g29230D	0.000251043	-5.14258	AT3G05910	0.0225367
BnaC07g23560D	0.000252859	-5.63964	AT3G26410	0.0226677
BnaA07g20960D	0.000253068	-1.33866	AT1G77530	0.0226677
BnaCnng55280D	0.000253426	7.72967	/	0.0226744
BnaA06g04460D	0.000253794	2.5443	AT1G07985	0.022682
BnaC02g31540D	0.000255398	-2.2273	AT5G45330	0.0227999
BnaC06g43050D	0.000256971	-4.59779	AT1G80080	0.0229147
BnaC07g32120D	0.000258004	-2.31838	AT3G51190	0.0229614
BnaAnng15370D	0.000258293	-2.26826	AT4G34850	0.0229614
BnaA09g43150D	0.000258613	1.37465	AT2G21490	0.0229614
BnaC08g31190D	0.000258772	-4.13415	AT3G61250	0.0229614
BnaCnng44950D	0.000258928	-2.79039	AT4G13840	0.0229614
BnaC03g66920D	0.000259269	-8.96442	AT4G32760	0.0229662
BnaC08g48860D	0.000260557	-3.49188	AT3G59350	0.0230288
BnaC09g37120D	0.000260759	-2.28332	AT5G20740	0.0230288
BnaA03g34420D	0.000260983	-5.47766	AT3G17120	0.0230288
BnaA02g17270D	0.000261126	-2.63368	AT1G75510	0.0230288
BnaC02g33320D	0.000263819	-2.86624	AT5G47530	0.0232408
BnaA01g27040D	0.00026412	2.35408	/	0.0232417
BnaC09g30760D	0.000264962	-6.12962	AT5G54390	0.0232902
BnaA08g04950D	0.000266369	3.78174	AT4G13070	0.0233758
BnaA07g13860D	0.000266519	-2.17678	AT2G28390	0.0233758
BnaC02g37280D	0.000267784	-3.86937	AT5G13930	0.023461
BnaA05g11320D	0.000268625	-1.87257	AT1G07920	0.0234914
BnaC02g33830D	0.000268718	-2.3233	AT2G01260	0.0234914
BnaA09g04870D	0.000270696	3.17789	AT5G24440	0.0236385
BnaC02g28920D	0.000273145	-2.60452	AT4G11030	0.023783
BnaC07g40300D	0.000273191	3.76773	/	0.023783
BnaA05g28940D	0.000273295	4.16845	AT3G09520	0.023783
BnaA02g13000D	0.00027378	-2.63435	AT1G67250	0.023783
BnaC03g35200D	0.000273835	-6.38548	AT3G07330	0.023783
BnaC04g31470D	0.00027523	-8.77003	AT4G26900	0.0238515
BnaA08g05680D	0.000275315	-5.52782	AT4G15430	0.0238515
BnaA05g20090D	0.000275517	-3.8111	AT3G20820	0.0238515
BnaA08g03510D	0.000277344	5.21593	AT1G48140	0.0239836
BnaC03g30930D	0.000278549	-2.2589	AT4G08500	0.0240619
BnaA08g13480D	0.000279634	-2.31693	AT4G29260	0.0241212
BnaC05g47700D	0.000279838	1.82598	AT3G03890	0.0241212
BnaAnng20100D	0.000282452	-3.52979	AT1G73230	0.0242988
BnaC01g39210D	0.000282608	-4.50424	AT3G09070	0.0242988
BnaC03g66950D	0.000282809	-2.18312	/	0.0242988
BnaA08g00370D	0.000284061	1.15843	AT1G55680	0.0243802
BnaC05g15900D	0.00028549	-1.49505	AT1G20610	0.0244767
BnaA08g01330D	0.000285805	-5.54209	AT1G53040	0.0244775
BnaC05g16650D	0.000286651	3.71104	AT1G21390	0.0245237
BnaC02g41920D	0.000287951	-4.18628	AT5G60990	0.0246086
BnaAnng08650D	0.000290324	5.95778	AT4G29960	0.0247718
BnaA06g16290D	0.000290775	-4.50346	AT3G48980	0.0247718
BnaC01g12080D	0.000290789	-6.68149	AT4G20360	0.0247718
BnaC03g68240D	0.000291285	2.56915	AT5G63820	0.024777
BnaC08g47190D	0.000291469	-11.1153	AT5G35180	0.024777
BnaC08g31440D	0.000292651	-3.88177	AT3G61580	0.0248484
BnaCnng10140D	0.00029293	-5.22639	/	0.0248484
BnaA02g13970D	0.000294214	-0.99196	AT3G45940	0.0249081
BnaA03g34250D	0.000295059	-9.98129	AT3G16640	0.0249081
BnaA08g07170D	0.000295301	6.52369	AT5G35100	0.0249081
BnaAnng29230D	0.000295374	2.09882	AT1G49990	0.0249081
BnaC09g17460D	0.000295481	2.85161	AT5G43300	0.0249081
BnaA07g30100D	0.000295825	-3.28772	AT1G72340	0.0249081
BnaA09g06770D	0.000296045	-3.07383	AT5G64270	0.0249081
BnaC01g17530D	0.000296121	-2.89302	/	0.0249081
BnaA07g03650D	0.000297718	-4.78788	AT2G16570	0.0250162
BnaC02g44260D	0.000298125	-2.60395	AT5G19400	0.0250241
BnaC02g13740D	0.000299205	-2.70635	AT1G65440	0.0250753
BnaA10g14200D	0.000299362	-4.57543	AT5G22140	0.0250753
BnaC02g31730D	0.00030131	-2.30661	AT5G45510	0.0252121
BnaA07g19990D	0.000304037	-8.57003	AT1G80680	0.0254138
BnaA03g36560D	0.000305954	-1.3995	AT4G15000	0.0255283
BnaA02g25820D	0.000306045	3.00528	AT2G01620	0.0255283
BnaA04g20660D	0.000307889	-2.62085	/	0.0256554
BnaC02g26020D	0.00030829	-2.62739	AT1G80860	0.0256562
BnaC07g33060D	0.000308791	2.07759	AT4G15530	0.0256562
BnaC05g10820D	0.00030886	-7.45617	AT1G14610	0.0256562
BnaC08g09320D	0.000310763	-6.48239	AT1G31070	0.0257686
BnaC08g24170D	0.000310857	-1.56415	AT3G52960	0.0257686
BnaA05g20100D	0.000311968	-2.97572	AT3G20810	0.025834
BnaC03g52550D	0.000313253	-4.15773	AT3G49240	0.0258919
BnaA02g11570D	0.000313314	1.6649	AT5G50700	0.0258919
BnaC07g08670D	0.000314654	-6.33831	AT1G30880	0.0259758
BnaCnng44010D	0.000318875	-5.1378	AT5G41970	0.0262972
BnaC05g13900D	0.000319501	-8.60856	AT5G35130	0.0263217
BnaA08g00920D	0.000320017	4.95288	AT1G54090	0.0263341
BnaC01g06580D	0.000320309	-3.21602	AT4G31850	0.0263341
BnaA09g28970D	0.000320768	-3.67857	AT1G26520	0.0263375
BnaC08g48080D	0.000321008	-5.06667	AT4G16140	0.0263375
BnaC02g30020D	0.000321498	-2.19887	AT5G43010	0.0263507
BnaA06g09980D	0.000322611	-9.24292	AT1G15300	0.0264049
BnaC08g21790D	0.000322819	-6.64459	AT5G62520	0.0264049
BnaC07g46180D	0.000324134	-11.3077	AT4G36700	0.0264854
BnaC04g17230D	0.000325962	-5.59953	AT2G26730	0.0266076
BnaCnng29830D	0.000326473	-2.46314	/	0.0266218
BnaA09g36160D	0.000327116	-4.21673	AT3G56860	0.0266218
BnaA02g13510D	0.00032724	-2.18946	AT1G68000	0.0266218
BnaC02g07020D	0.000327796	-1.26449	AT5G17160	0.0266218
BnaC02g26210D	0.000327897	1.79279	AT3G47090	0.0266218
BnaCnng48800D	0.00032813	-4.66527	AT1G74240	0.0266218
BnaC05g02690D	0.000328682	-6.7978	AT1G04570	0.0266395
BnaC08g47150D	0.000329339	1.48453	AT5G35110	0.0266658
BnaC03g62880D	0.000331138	3.28577	AT4G18830	0.0267844
BnaA03g39300D	0.000333382	-9.50275	AT2G16770	0.0269128
BnaA03g28670D	0.000333464	-8.40035	AT3G04610	0.0269128
BnaC09g43820D	0.000333735	-6.60537	AT5G13260	0.0269128
BnaA03g31570D	0.000335874	2.04171	AT1G72260	0.0270581
BnaA06g12390D	0.000336446	-4.64369	AT1G18250	0.027077
BnaA02g33340D	0.000337115	-4.14387	AT5G62290	0.0271036
BnaC08g13260D	0.000338857	-2.21818	AT4G29000	0.0272163
BnaA06g13890D	0.000339365	-5.18712	AT1G19720	0.0272298
BnaA06g24270D	0.000339734	-3.25384	AT5G65380	0.0272321
BnaA09g39150D	0.000341841	-2.67539	AT3G61410	0.0273385
BnaA08g15810D	0.000342054	-6.57867	AT4G37830	0.0273385
BnaC04g08820D	0.000342085	-6.60435	AT2G36485	0.0273385
BnaC08g15580D	0.000343851	-4.2456	AT1G12380	0.0274522
BnaA06g04690D	0.00034421	-8.30926	AT1G08260	0.0274535
BnaA07g36280D	0.000345665	-6.89837	AT2G17265	0.0275421
BnaC07g24140D	0.000347993	-6.94168	AT3G27280	0.0277
BnaCnng60070D	0.000351173	1.98717	AT1G75160	0.0279003
BnaA01g10880D	0.000351205	1.8886	AT4G21020	0.0279003
BnaAnng20850D	0.000351578	3.0622	AT5G65610	0.0279022
BnaA07g24820D	0.000352305	-4.77393	AT1G68060	0.0279322
BnaA08g25120D	0.000353118	-2.85022	AT1G11820	0.0279561
BnaC06g19030D	0.000353304	-6.38294	AT1G79990	0.0279561
BnaA02g13720D	0.0003555	-2.23899	AT1G68310	0.028102
BnaA09g19860D	0.000356029	-2.49435	AT4G05190	0.0281161
BnaA08g29770D	0.000358215	-13.5127	AT1G42430	0.0282362
BnaC03g77080D	0.000358663	-4.83839	AT4G34150	0.0282362
BnaC08g34820D	0.000358867	-3.27484	AT3G07860	0.0282362
BnaCnng39420D	0.000358961	-3.0194	AT2G02880	0.0282362
BnaC09g51960D	0.000359648	-4.05274	AT5G38360	0.0282626
BnaC09g33410D	0.000360533	-5.54616	AT5G56890	0.0283015
BnaC03g55780D	0.00036185	-2.7147	AT3G46160	0.0283015
BnaC03g57650D	0.000362398	-8.44354	AT4G38680	0.0283015
BnaCnng42440D	0.000362509	3.3327	AT5G54330	0.0283015
BnaA06g14300D	0.000362592	-3.31647	AT1G20220	0.0283015
BnaC05g12890D	0.000362676	-2.33016	AT1G16880	0.0283015
BnaA04g05680D	0.000362902	-6.80563	AT3G52140	0.0283015
BnaAnng11330D	0.000362971	-0.884615	AT1G30470	0.0283015
BnaCnng61170D	0.000363452	2.91079	AT5G61370	0.0283114
BnaC03g20560D	0.000364302	3.47835	AT4G03580	0.0283501
BnaA09g08900D	0.000365112	-3.04258	AT2G16800	0.0283723
BnaA09g30410D	0.000365812	-8.84962	AT1G22730	0.0283723
BnaC05g30130D	0.000366132	-3.96453	AT1G74060	0.0283723
BnaC02g29660D	0.00036635	-4.24924	AT5G66750	0.0283723
BnaA09g31060D	0.00036636	-3.33368	AT1G23410	0.0283723
BnaCnng19590D	0.000367297	-4.8842	AT5G57800	0.0284175
BnaA08g26790D	0.000367672	-8.1439	AT1G08780	0.028419
BnaA09g21890D	0.000368455	-3.22921	AT4G11240	0.0284521
BnaC02g33860D	0.000369341	-3.04646	AT2G01270	0.028493
BnaA03g51030D	0.000370515	-4.67495	AT4G34250	0.0285561
BnaC02g33880D	0.000372755	-3.52577	AT2G01290	0.0287011
BnaA09g52720D	0.000374248	-3.30025	AT2G15290	0.0287764
BnaC09g02550D	0.000374453	-3.57474	AT5G48760	0.0287764
BnaC02g24390D	0.000376575	1.2819	AT1G75490	0.0288895
BnaA07g05030D	0.000376645	-8.91429	AT3G25150	0.0288895
BnaA08g08630D	0.000377251	-2.34055	AT4G18210	0.0289082
BnaC04g08780D	0.000382589	-3.09844	AT2G36530	0.0292708
BnaC05g18370D	0.000382713	-11.9585	AT1G22970	0.0292708
BnaAnng37740D	0.000385468	-5.70203	AT3G54390	0.0294534
BnaC04g23500D	0.000387864	-7.89834	AT3G58610	0.0296082
BnaA05g36000D	0.000390273	1.96991	AT1G49950	0.0297637
BnaC08g10440D	0.000390653	-3.11381	AT4G15802	0.0297643
BnaCnng14430D	0.000391451	5.13707	AT1G08650	0.0297968
BnaC04g17710D	0.000392638	-4.37648	AT5G43020	0.0298588
BnaC04g31750D	0.000393458	-4.23442	AT3G29020	0.0298927
BnaA06g29520D	0.000394295	-6.77738	AT5G49400	0.0299112
BnaAnng08400D	0.000394632	-3.43553	AT4G36070	0.0299112
BnaA03g25610D	0.000394822	-4.76638	AT4G04940	0.0299112
BnaC07g43750D	0.00039866	8.69612	AT4G32295	0.0301367
BnaC03g60480D	0.000399097	-6.49776	AT4G39230	0.0301367
BnaA08g11160D	0.000399161	3.65749	AT4G34460	0.0301367
BnaCnng10840D	0.000399304	-1.75848	AT3G20390	0.0301367
BnaC06g19080D	0.000401534	-6.47187	AT1G80270	0.0302639
BnaCnng35560D	0.000401745	-11.595	AT5G35400	0.0302639
BnaC04g01600D	0.00040313	-6.71818	AT2G40840	0.030314
BnaC07g43040D	0.000403167	-4.90847	AT4G30960	0.030314
BnaCnng71380D	0.000404123	-10.7753	AT3G51950	0.0303574
BnaC05g50780D	0.000405618	-5.65933	AT1G24100	0.0304101
BnaC02g39110D	0.000405618	-1.04595	/	0.0304101
BnaA07g29860D	0.000405964	-5.23588	AT1G72090	0.0304101
BnaA05g30500D	0.000406526	-5.95483	AT3G07050	0.0304237
BnaC08g32240D	0.000408413	-6.35803	AT3G62450	0.0305298
BnaA09g20150D	0.000408706	-5.63107	AT4G04910	0.0305298
BnaC03g64930D	0.000409611	2.58878	AT4G12560	0.0305689
BnaAnng08950D	0.000410081	-9.70383	AT4G13750	0.0305737
BnaA09g28600D	0.000410439	-5.00558	AT1G25520	0.0305737
BnaA06g14020D	0.000411348	-1.44038	AT5G57740	0.0306129
BnaCnng06460D	0.000412116	-8.43955	AT1G08880	0.0306416
BnaC05g35550D	0.000413864	-6.79494	AT3G17920	0.0306748
BnaC01g04810D	0.000414108	-2.43547	AT4G33400	0.0306748
BnaA04g16160D	0.000414308	-2.68928	AT2G27970	0.0306748
BnaA02g33250D	0.000415409	-2.5983	AT3G59820	0.0306748
BnaA05g14610D	0.000415721	-7.73079	AT1G53200	0.0306748
BnaC07g42220D	0.000415738	-3.203	AT4G29905	0.0306748
BnaA02g14760D	0.000415969	-1.54015	AT1G70160	0.0306748
BnaC04g04050D	0.000416023	-7.65333	AT2G40360	0.0306748
BnaC08g20190D	0.00041626	-2.52885	AT1G27420	0.0306748
BnaC04g55250D	0.000416392	-9.93761	AT3G60880	0.0306748
BnaC08g13450D	0.000417204	-12.9686	AT1G08410	0.0306788
BnaC07g07670D	0.000417213	2.79496	/	0.0306788
BnaA08g30820D	0.00041893	-4.44639	AT4G25740	0.0307767
BnaCnng26910D	0.000420952	-12.9214	AT1G20260	0.0308895
BnaC02g13370D	0.000421236	-1.6177	AT5G55070	0.0308895
BnaC05g32550D	0.000422603	-9.96334	AT3G20000	0.0309614
BnaC05g50330D	0.000423636	-3.4228	AT1G21050	0.0310087
BnaCnng38830D	0.000424394	-9.07418	AT1G61730	0.0310358
BnaA03g23510D	0.000425383	2.30235	AT5G50750	0.0310797
BnaA03g40370D	0.000426474	0.934113	AT5G61590	0.0311146
BnaC02g42330D	0.000426637	-2.73822	AT5G62865	0.0311146
BnaCnng16640D	0.000427357	-1.82485	AT5G54400	0.0311388
BnaA08g22790D	0.000429244	-3.45814	AT1G18080	0.0312446
BnaCnng08470D	0.00042959	-2.95605	AT2G18510	0.0312446
BnaA06g03040D	0.000431593	-4.32193	AT1G49720	0.0313489
BnaAnng26580D	0.000431807	-2.63172	AT5G61510	0.0313489
BnaC02g34300D	0.000432538	-1.95993	AT2G02070	0.0313735
BnaC05g32510D	0.000433019	-5.91615	AT3G20015	0.03138
BnaC03g48340D	0.000434623	-6.97493	AT2G18330	0.0314677
BnaA02g36490D	0.000435818	-2.92465	AT4G00750	0.0315257
BnaA09g25340D	0.000436254	-4.08186	AT3G02120	0.0315288
BnaC03g59570D	0.00043823	-11.6333	AT1G30000	0.0316205
BnaC05g09480D	0.000438312	-6.68897	AT1G12330	0.0316205
BnaA08g12150D	0.000438935	6.63179	AT4G32551	0.0316369
BnaA07g25850D	0.000439659	-3.46561	AT1G66430	0.0316606
BnaC07g46510D	0.000440227	-5.05981	AT4G37450	0.031673
BnaA03g35180D	0.000440783	5.29141	AT3G19270	0.0316845
BnaA05g20080D	0.000441766	-3.78678	AT3G20830	0.0317267
BnaA06g14670D	0.000443217	-6.89851	AT1G20830	0.0318024
BnaA09g36860D	0.000444939	-5.49577	AT3G57550	0.0318588
BnaA09g52750D	0.000444983	-1.30224	AT2G14910	0.0318588
BnaC03g66090D	0.000445196	-9.75155	AT4G34450	0.0318588
BnaA06g40600D	0.000446937	-2.77634	AT4G39480	0.0319548
BnaC02g12830D	0.000451052	-1.00101	AT5G55700	0.0321748
BnaC07g46660D	0.000451174	-6.01981	AT4G37640	0.0321748
BnaA03g27790D	0.000451591	-4.962	AT3G02200	0.0321748
BnaC05g25190D	0.000451621	-6.52774	AT1G31300	0.0321748
BnaC01g19760D	0.000453236	-4.42113	AT4G16563	0.0322611
BnaC07g10580D	0.000454729	-4.19549	AT1G28290	0.0323386
BnaAnng26160D	0.000455301	-2.2779	AT4G25760	0.0323506
BnaA10g02710D	0.000455836	-2.73228	AT1G04570	0.0323599
BnaA02g16100D	0.000456489	-5.28732	AT1G72730	0.0323775
BnaA08g03250D	0.000457407	-11.3438	AT1G48430	0.032414
BnaC08g03190D	0.000458969	-9.74454	AT1G48920	0.0324953
BnaC03g58240D	0.000459366	-6.46723	AT1G28060	0.0324953
BnaC06g00420D	0.000459775	5.69275	AT1G45249	0.0324955
BnaA08g05660D	0.00046029	-3.68289	AT4G15210	0.0325032
BnaC05g34570D	0.000464871	-4.65112	AT3G18600	0.0327656
BnaA09g22120D	0.000465212	-2.74018	AT4G11080	0.0327656
BnaC07g15500D	0.000465342	-7.74375	AT1G20220	0.0327656
BnaA06g37080D	0.000465819	-4.14641	AT5G42720	0.0327656
BnaA03g46140D	0.000466052	-3.39452	AT4G23650	0.0327656
BnaC02g42360D	0.000467803	-2.3444	AT5G62910	0.0328599
BnaC04g18920D	0.00046832	-1.56437	AT1G61667	0.0328674
BnaC02g29720D	0.000469326	-1.80742	AT1G43170	0.0328886
BnaC03g46450D	0.00046945	3.57781	AT2G16580	0.0328886
BnaC03g51290D	0.000470103	-4.81703	AT5G62960	0.0328886
BnaC05g35250D	0.00047045	-6.10179	AT1G60180	0.0328886
BnaC08g31410D	0.000470676	-2.71329	AT3G61530	0.0328886
BnaC05g36120D	0.000471211	-3.87437	AT3G17260	0.0328973
BnaA07g26010D	0.000472004	-3.31887	AT1G66780	0.0329239
BnaC04g32400D	0.00047391	-6.56768	AT5G40880	0.0330281
BnaC01g03050D	0.000475188	-2.7536	AT4G35550	0.0330884
BnaC03g62180D	0.000476711	-12.0723	AT4G23630	0.0331555
BnaC08g22800D	0.000476981	-12.7881	AT3G51390	0.0331555
BnaA02g15720D	0.00048008	-1.54328	AT1G72020	0.033328
BnaA07g18350D	0.000480598	-1.88593	AT3G59400	0.033328
BnaC02g33330D	0.000481075	-2.42823	AT5G47540	0.033328
BnaC03g63240D	0.000481607	-12.8084	AT4G19500	0.033328
BnaC03g16770D	0.000481864	1.05352	AT2G30270	0.033328
BnaA09g55440D	0.000481959	-3.84537	AT3G59650	0.033328
BnaA02g09320D	0.000483065	1.36534	AT5G55050	0.0333756
BnaC07g07610D	0.000484746	-4.64443	AT1G31660	0.0334629
BnaA04g28480D	0.000486004	-3.05132	AT2G29670	0.0335209
BnaCnng17640D	0.000486902	-6.30549	AT2G18900	0.0335539
BnaA06g28870D	0.000489873	-3.58249	AT5G27330	0.0336904
BnaC08g07690D	0.000490009	-2.51028	AT1G32920	0.0336904
BnaA03g17990D	0.000490144	-3.99784	AT2G38660	0.0336904
BnaA07g00410D	0.000491097	-1.88778	AT2G20570	0.0337269
BnaC04g20730D	0.000492264	-6.98346	AT3G63300	0.0337781
BnaC08g27430D	0.000493183	-8.99906	AT3G56510	0.0337816
BnaCnng46900D	0.000493473	-11.2027	AT3G54250	0.0337816
BnaC05g25600D	0.000493581	-1.67284	AT2G47800	0.0337816
BnaA03g47440D	0.000494805	-6.27027	AT3G48380	0.0337922
BnaC05g05900D	0.000494855	1.59642	AT3G50685	0.0337922
BnaA06g15490D	0.000495239	-4.12425	AT1G21740	0.0337922
BnaA05g09790D	0.000495423	-3.22743	AT2G33860	0.0337922
BnaA02g13630D	0.000496325	-2.87134	AT2G25710	0.0338026
BnaA10g09210D	0.000496442	-7.52862	AT5G54910	0.0338026
BnaCnng41730D	0.000496842	-1.83557	AT5G47870	0.0338026
BnaC03g60720D	0.000498489	-11.3347	AT4G39850	0.0338858
BnaA02g19200D	0.000500755	-3.33786	AT1G79230	0.034011
BnaC03g25390D	0.000501663	-8.11521	AT2G45695	0.0340357
BnaC08g16920D	0.000502008	-2.13998	AT1G16330	0.0340357
BnaA06g14260D	0.000502396	-6.11677	AT2G25700	0.0340357
BnaC02g40260D	0.000502819	-5.22366	AT1G56070	0.0340357
BnaC05g14180D	0.000503568	-11.618	AT1G18500	0.0340576
BnaC04g52240D	0.000504687	2.69821	AT2G40970	0.0340847
BnaC02g08160D	0.00050482	-1.35292	AT5G18550	0.0340847
BnaA07g30140D	0.00050571	-5.26296	AT1G72370	0.0341161
BnaA06g04320D	0.000508163	-1.30728	AT1G07660	0.0342527
BnaC05g49370D	0.000510825	-4.59997	AT1G13630	0.0344031
BnaC02g23070D	0.000514645	-7.04882	AT1G80480	0.0346313
BnaC03g67830D	0.000518483	-9.49564	AT4G30935	0.0348388
BnaA06g37890D	0.000518599	-2.57249	AT1G09470	0.0348388
BnaC08g02650D	0.000519942	-2.24046	AT1G19880	0.0348708
BnaA06g22980D	0.000519946	-6.87933	AT5G63860	0.0348708
BnaC09g37000D	0.000520851	-12.1202	AT5G20890	0.0348842
BnaC04g04680D	0.000521017	-11.0533	AT2G45980	0.0348842
BnaA04g19980D	0.000522463	3.25787	AT2G34140	0.0349518
BnaC03g45290D	0.000523454	-3.88899	AT2G13790	0.034974
BnaC02g04920D	0.000524252	-0.840171	AT5G13650	0.034974
BnaC02g33390D	0.0005248	-2.75238	AT5G47630	0.034974
BnaC03g38840D	0.000525712	-6.38151	AT3G15000	0.034974
BnaA06g36160D	0.000526121	-7.98106	AT5G46160	0.034974
BnaA08g06940D	0.000526162	-4.40641	AT1G32230	0.034974
BnaA08g08720D	0.000526428	7.83304	AT4G18340	0.034974
BnaCnng39430D	0.000526515	-2.20822	AT2G02910	0.034974
BnaC03g26800D	0.000526726	-3.63354	AT3G22260	0.034974
BnaA05g29860D	0.000527626	-4.46103	AT3G07790	0.0350047
BnaC01g10190D	0.000529752	-1.97059	AT2G07170	0.0351167
BnaC06g10400D	0.000530714	-1.29152	AT1G54010	0.0351514
BnaC03g48030D	0.000531538	3.85335	AT2G17760	0.0351533
BnaA05g19630D	0.000531622	-4.95126	AT3G21560	0.0351533
BnaC02g12450D	0.000532917	-1.23582	AT5G56150	0.0352099
BnaC08g16790D	0.000534435	-4.38641	AT1G15820	0.0352811
BnaC01g04670D	0.00053496	-4.60981	AT4G33520	0.0352867
BnaA08g30510D	0.000537007	-4.52059	AT4G19960	0.0353925
BnaC02g05200D	0.000538192	-1.67347	AT5G14240	0.0354415
BnaA04g10410D	0.000538908	-2.11589	AT5G40530	0.0354531
BnaCnng39980D	0.000539254	-2.32372	AT4G37080	0.0354531
BnaA06g23560D	0.000540462	-1.09253	AT5G64570	0.0355033
BnaC07g23810D	0.000541345	5.08177	AT3G26720	0.0355322
BnaCnng77290D	0.00054417	-4.039	AT3G29780	0.0356445
BnaC06g31320D	0.000544213	-1.99265	AT1G70230	0.0356445
BnaA02g13310D	0.000544392	-1.69278	AT1G67730	0.0356445
BnaC02g42040D	0.000544904	-3.32694	AT5G61150	0.0356489
BnaC02g26300D	0.000546586	-2.40621	AT4G12570	0.0357227
BnaA07g02490D	0.000546923	-4.81802	AT2G17230	0.0357227
BnaC09g11930D	0.00054785	-7.31445	AT1G64190	0.035754
BnaA08g11490D	0.000548928	-10.2948	AT4G33650	0.0357729
BnaA08g08130D	0.000549033	-11.4659	AT4G16845	0.0357729
BnaC03g33870D	0.000550915	-9.20688	AT3G04710	0.0358664
BnaC02g12850D	0.000551935	-2.09822	AT5G55680	0.0359035
BnaA06g37110D	0.000553774	-11.6072	AT5G42540	0.0359879
BnaA03g20510D	0.000554536	3.0584	AT2G43820	0.0359879
BnaC05g35340D	0.000555065	-7.21889	AT3G18140	0.0359879
BnaAnng17950D	0.000555163	-6.93056	AT4G38210	0.0359879
BnaCnng50050D	0.000555479	-1.56984	AT3G13180	0.0359879
BnaC03g32470D	0.00055698	-10.5996	AT3G01510	0.036056
BnaC08g11770D	0.000562157	-7.65151	AT4G24770	0.0363618
BnaC02g46860D	0.000563919	-3.4643	AT5G47455	0.0364463
BnaC02g10240D	0.000564694	-2.00553	AT5G59180	0.0364669
BnaC02g39120D	0.000566123	-3.8405	AT3G06670	0.0365054
BnaC02g28350D	0.000566924	-3.48417	/	0.0365054
BnaA03g28710D	0.000567179	-2.43567	AT3G04650	0.0365054
BnaA09g08870D	0.000567192	-3.33483	AT2G16770	0.0365054
BnaA08g11950D	0.000567568	3.66726	AT4G33000	0.0365054
BnaA08g13980D	0.000568188	-5.4243	AT4G27900	0.0365159
BnaC02g28900D	0.000569919	-2.44661	AT4G11100	0.036586
BnaA02g16070D	0.000570643	-2.20458	AT1G72700	0.036586
BnaC03g39500D	0.000570649	-3.14114	AT3G29635	0.036586
BnaC03g27730D	0.000571931	-9.85438	AT5G50310	0.0366173
BnaA02g35710D	0.000572052	-2.27507	AT1G69840	0.0366173
BnaC07g21960D	0.000574048	-3.51434	AT2G02820	0.0366975
BnaA07g08340D	0.000574222	1.96527	AT3G25110	0.0366975
BnaC08g11660D	0.000577656	-10.6307	AT4G24440	0.0368875
BnaC07g16060D	0.000579272	-6.03467	AT5G67280	0.0369209
BnaA06g16440D	0.000579549	1.6679	AT1G70770	0.0369209
BnaCnng25390D	0.000580254	-6.16622	AT2G02955	0.0369209
BnaA08g13650D	0.000580353	-3.43452	AT4G28550	0.0369209
BnaC05g14090D	0.000580485	-2.19403	AT1G18370	0.0369209
BnaA07g24600D	0.000581064	-5.52214	AT1G68530	0.0369285
BnaC05g48970D	0.000581836	-3.10606	AT1G04680	0.0369482
BnaC03g62010D	0.000582461	-2.59357	AT4G36150	0.0369586
BnaA09g24150D	0.000583295	-4.93221	AT1G32860	0.0369822
BnaA05g23860D	0.000584585	1.45064	AT3G15670	0.0370346
BnaA09g50370D	0.000585136	-9.01166	AT1G05205	0.0370351
BnaA08g10140D	0.000585516	-8.49866	AT4G22120	0.0370351
BnaA10g23260D	0.000587325	-5.39912	AT5G08100	0.0370755
BnaC04g28370D	0.000587465	-8.51379	AT3G52180	0.0370755
BnaA08g07580D	0.000587545	-6.97006	AT4G14040	0.0370755
BnaA02g14930D	0.000589164	-1.35565	AT1G70505	0.0371245
BnaC09g43280D	0.000589248	-6.27313	AT5G13890	0.0371245
BnaC03g20240D	0.000590231	-3.71744	AT2G36570	0.0371572
BnaA08g01230D	0.000591969	3.38435	AT1G53270	0.0372138
BnaCnng63980D	0.000592061	-3.21212	AT1G52190	0.0372138
BnaA08g13280D	0.000592621	-4.77984	AT4G29920	0.0372198
BnaAnng36740D	0.000597373	-2.14595	AT1G21720	0.0374075
BnaA03g47600D	0.000597666	-5.11223	AT4G25730	0.0374075
BnaA10g25150D	0.000597794	-4.0202	AT5G05240	0.0374075
BnaAnng35210D	0.000597818	-7.3498	AT1G50500	0.0374075
BnaC02g47640D	0.000597944	-1.90598	AT2G01420	0.0374075
BnaC09g43800D	0.000604993	-5.47007	AT5G13280	0.0377881
BnaA07g13390D	0.000605266	-5.40118	AT5G27300	0.0377881
BnaA04g06220D	0.000605867	-4.16094	AT3G23660	0.0377881
BnaC03g62030D	0.000605915	-2.54527	AT4G36140	0.0377881
BnaA09g33760D	0.000606811	-2.79831	AT3G53460	0.0378145
BnaA02g12820D	0.000610096	-2.63948	AT1G67080	0.0379713
BnaA09g30000D	0.000610728	-5.50786	AT1G23260	0.0379713
BnaC03g68730D	0.000610855	-3.51221	/	0.0379713
BnaC07g23850D	0.000611225	-3.33298	AT5G16830	0.0379713
BnaC04g05640D	0.000613142	1.21089	AT2G39770	0.0380393
BnaC05g18200D	0.00061327	-8.90107	AT1G22910	0.0380393
BnaC08g06850D	0.000616998	-0.822666	AT1G34580	0.038241
BnaA01g31500D	0.000617516	-1.35907	/	0.0382435
BnaC05g52090D	0.000619131	-1.65791	AT3G14130	0.0383139
BnaC08g18200D	0.000620393	-5.67586	AT1G18670	0.0383623
BnaC05g02760D	0.000624407	-5.75136	AT1G04730	0.0385487
BnaA03g09210D	0.00062468	-2.15057	AT5G59850	0.0385487
BnaC03g39240D	0.000624971	-6.21087	AT3G15680	0.0385487
BnaC02g07160D	0.000625332	-1.57889	AT1G44110	0.0385487
BnaA09g28880D	0.000627027	-5.62918	AT1G26370	0.0386234
BnaCnng57390D	0.00062793	-3.93551	AT5G47770	0.0386493
BnaA07g20330D	0.000628571	-3.91611	AT1G79490	0.038659
BnaC08g35890D	0.000629119	-5.16141	AT2G21250	0.0386631
BnaA09g07020D	0.000633708	-2.83684	AT5G64813	0.0389152
BnaA07g23270D	0.000634571	-5.00934	AT1G72050	0.0389171
BnaC02g30730D	0.000634711	-5.61092	AT5G43990	0.0389171
BnaC06g34220D	0.000641262	-1.87893	/	0.0392695
BnaA05g10070D	0.000641439	-2.88323	AT2G33510	0.0392695
BnaC05g11110D	0.000643965	-2.16947	AT1G80130	0.0393941
BnaC06g13950D	0.000646991	-8.4814	AT5G42100	0.0395288
BnaC09g36070D	0.000647155	1.78313	AT5G22990	0.0395288
BnaA03g54190D	0.000648686	-5.0452	AT4G37670	0.0395622
BnaA08g14500D	0.00064869	-1.23231	AT4G25300	0.0395622
BnaA06g24900D	0.000650716	-6.98985	AT5G67630	0.0396556
BnaC04g43420D	0.000652024	-6.76528	AT2G32930	0.0396848
BnaCnng17780D	0.000653978	-4.87658	AT1G30240	0.0396848
BnaC03g45040D	0.000654012	-7.21576	AT2G05990	0.0396848
BnaC04g19870D	0.00065403	-6.91272	AT2G39130	0.0396848
BnaC05g48990D	0.000654603	-3.10887	AT1G04660	0.0396848
BnaA06g13730D	0.00065479	-4.81061	AT1G19520	0.0396848
BnaC03g66290D	0.000655022	-4.09129	AT3G44010	0.0396848
BnaC09g02350D	0.00065516	-6.64669	AT5G48385	0.0396848
BnaC04g08320D	0.000656632	-8.00828	AT2G36930	0.0397439
BnaC07g46670D	0.000657482	-8.81351	AT4G37650	0.0397652
BnaCnng71360D	0.000658322	2.15448	AT3G28540	0.0397777
BnaA03g47930D	0.000658681	2.22616	AT4G26300	0.0397777
BnaC08g35880D	0.000663304	-4.57905	AT2G21270	0.0400267
BnaCnng36390D	0.00066389	-2.43696	AT5G07580	0.0400319
BnaC07g30530D	0.000666615	1.81105	AT5G23870	0.040166
BnaA08g14900D	0.000669044	-2.66461	AT4G35720	0.040282
BnaA07g31190D	0.000669601	-7.45908	AT1G74030	0.0402852
BnaA02g20090D	0.000670401	1.45976	AT1G79910	0.0403013
BnaC02g04470D	0.000670875	-3.45853	AT5G13020	0.0403013
BnaC05g40790D	0.00067194	-3.05301	AT3G12270	0.040335
BnaC09g03170D	0.00067349	-2.54657	AT5G27460	0.0403978
BnaC02g39080D	0.000676309	-1.31157	AT5G49460	0.0405365
BnaA05g21350D	0.000677847	-4.60706	AT3G18780	0.0405983
BnaA02g15550D	0.000680825	-2.47507	/	0.0407298
BnaC02g48760D	0.00068106	-2.34882	AT5G24500	0.0407298
BnaA05g36400D	0.000683187	-5.1336	AT1G48920	0.0408265
BnaC02g33100D	0.000684992	-2.46124	AT5G47080	0.0409039
BnaC02g39130D	0.00068635	-3.73858	AT3G06670	0.0409544
BnaA02g20220D	0.000687128	-8.17805	AT1G64750	0.0409673
BnaA01g32380D	0.000687999	-7.34476	AT3G07290	0.0409673
BnaC02g32440D	0.000688578	-5.03092	AT3G18295	0.0409673
BnaAnng19440D	0.000688918	3.30405	AT2G43820	0.0409673
BnaA07g29760D	0.000689489	-3.06417	AT1G71960	0.0409673
BnaC07g12800D	0.000689866	-2.80319	AT1G27130	0.0409673
BnaC08g30550D	0.000690147	-7.16707	AT3G61090	0.0409673
BnaA08g28260D	0.000690883	-6.1738	AT1G05470	0.0409806
BnaC09g42220D	0.000692689	-7.67965	AT5G15650	0.0410237
BnaC05g16820D	0.000692849	1.52053	AT1G21540	0.0410237
BnaA08g08940D	0.000693145	-4.26256	AT4G18880	0.0410237
BnaA08g02370D	0.000693894	4.21828	AT1G49840	0.0410376
BnaC02g34990D	0.000694657	-3.69308	AT2G03340	0.0410525
BnaC07g47330D	0.000698073	-3.39678	AT4G39210	0.0412239
BnaC08g44860D	0.000699723	2.79206	AT1G06650	0.0412727
BnaC08g35620D	0.000699931	-5.00576	AT2G21510	0.0412727
BnaC09g39210D	0.000701452	-2.37183	/	0.041332
BnaA07g19610D	0.00070197	-3.60791	AT1G15210	0.0413321
BnaC01g01450D	0.00070302	-2.67868	AT4G37450	0.0413635
BnaA07g26100D	0.000704437	-3.19472	AT5G46450	0.0414139
BnaC02g27730D	0.000705753	-2.85562	AT4G01100	0.0414139
BnaA09g06250D	0.000705859	-2.5786	AT5G62850	0.0414139
BnaC09g33690D	0.000705945	-8.88536	AT5G58240	0.0414139
BnaC03g20610D	0.000707305	-3.91025	AT2G37230	0.0414633
BnaC04g27690D	0.000707958	-1.88649	AT1G23790	0.0414712
BnaC07g01890D	0.00070992	-3.07269	AT2G19410	0.04154
BnaA06g39820D	0.000710169	-3.09366	AT2G03690	0.04154
BnaA02g34380D	0.00071097	-1.8372	AT5G64770	0.0415564
BnaA09g31800D	0.000712037	3.23551	AT5G62160	0.0415885
BnaC03g60150D	0.000713289	-2.5523	AT4G38730	0.0416312
BnaA09g54510D	0.000713914	-1.84043	AT1G25422	0.0416374
BnaA02g14340D	0.000716341	-1.73871	AT1G69530	0.0417485
BnaCnng39410D	0.000717046	-1.94647	AT2G02870	0.0417592
BnaC03g56260D	0.000717744	-2.92316	AT1G79380	0.0417695
BnaA07g03860D	0.000718548	-8.29267	AT2G15270	0.0417859
BnaA02g16170D	0.000720363	-2.0738	AT1G72810	0.0418388
BnaA05g19420D	0.000721045	-8.97022	AT3G21820	0.0418388
BnaC03g77120D	0.000721706	-2.48812	AT4G33980	0.0418388
BnaA06g40930D	0.000721748	-6.22378	AT4G38270	0.0418388
BnaA03g38260D	0.00072207	-8.61263	AT2G11890	0.0418388
BnaA09g28320D	0.000723227	-4.75121	AT1G24610	0.0418755
BnaAnng14700D	0.000724384	3.33813	AT1G14350	0.0419122
BnaC03g37790D	0.000727053	-2.0628	AT3G12700	0.0419803
BnaC02g33120D	0.000727367	-2.62315	AT5G47100	0.0419803
BnaCnng55860D	0.000727999	-1.12625	AT5G38430	0.0419803
BnaC03g59980D	0.000728156	-8.75532	AT4G38380	0.0419803
BnaC05g50790D	0.000728182	-5.71407	AT1G24090	0.0419803
BnaC04g22270D	0.000729433	-2.80934	/	0.0420222
BnaA07g24130D	0.000734498	-6.98125	AT1G66580	0.0422835
BnaC02g13580D	0.000735293	-2.47479	AT5G54660	0.0422989
BnaA06g40660D	0.00073593	-2.26407	AT4G39330	0.042299
BnaC09g01160D	0.000736466	-0.958701	AT3G26740	0.042299
BnaCnng49290D	0.000736879	-5.30327	AT4G25450	0.042299
BnaA08g03020D	0.000738596	7.81519	AT1G48790	0.0423672
BnaC04g29970D	0.000739301	-7.37809	AT5G36290	0.0423773
BnaA10g17720D	0.000740333	-4.90062	AT5G16750	0.0424061
BnaA05g29600D	0.000740901	-4.12662	AT3G08630	0.0424083
BnaCnng48150D	0.00074208	-8.2061	AT1G56350	0.0424454
BnaC03g60460D	0.000744946	-4.39336	AT4G39200	0.0425569
BnaCnng53990D	0.000745093	3.88345	AT1G42650	0.0425569
BnaC02g33400D	0.000746707	-2.14707	AT5G47640	0.0426187
BnaA02g17230D	0.000748458	-2.18983	AT1G75460	0.0426536
BnaC09g01400D	0.000748899	-1.72543	AT3G27280	0.0426536
BnaA09g09970D	0.000748964	-2.61781	AT2G19750	0.0426536
BnaC03g69380D	0.000750416	2.72402	AT1G53100	0.0426536
BnaA09g34620D	0.000750442	2.48292	AT5G62810	0.0426536
BnaA02g14000D	0.000750514	-0.489153	AT1G68790	0.0426536
BnaC08g34730D	0.000751325	-7.2162	AT2G22900	0.0426619
BnaA07g00320D	0.00075224	-6.13102	AT2G20470	0.0426619
BnaC04g17720D	0.000752258	-4.56195	AT5G43020	0.0426619
BnaC03g58140D	0.000754354	-4.59107	AT1G27770	0.0427504
BnaC08g46920D	0.000755076	-1.40988	AT4G13340	0.0427611
BnaA09g06270D	0.000760294	-2.75165	AT5G62890	0.0429991
BnaA06g07580D	0.000760352	-6.59875	AT1G13170	0.0429991
BnaC01g27610D	0.000761595	3.03405	AT1G57990	0.043039
BnaC05g16210D	0.000762341	-12.0433	AT1G20910	0.0430508
BnaC02g31920D	0.000764678	-2.01655	AT5G45900	0.0431495
BnaC04g22010D	0.000765167	-8.45229	AT3G60750	0.0431495
BnaA03g44500D	0.000765819	-4.17373	AT4G20270	0.0431559
BnaA10g24180D	0.000766509	1.42806	AT5G06760	0.0431644
BnaA04g16110D	0.000769721	-2.57772	AT2G27920	0.0433148
BnaC08g36060D	0.00077758	-11.5761	AT2G20990	0.0437263
BnaC05g10830D	0.000778789	-2.07206	AT1G14630	0.0437353
BnaC06g37940D	0.000778832	1.94841	AT1G77210	0.0437353
BnaA10g10830D	0.000780329	-6.80766	AT5G56680	0.0437887
BnaC01g14980D	0.000781743	-3.37906	AT4G23410	0.0438102
BnaA08g17010D	0.000782193	-7.1092	AT4G38600	0.0438102
BnaA09g30950D	0.00078287	-4.61582	AT1G23550	0.0438102
BnaC08g47050D	0.000782901	-8.47887	AT1G36390	0.0438102
BnaAnng15460D	0.000783645	-5.04748	AT1G07920	0.0438212
BnaC09g16120D	0.000785623	-2.55802	AT3G62150	0.0438712
BnaC07g31420D	0.000785944	-5.47829	AT5G61660	0.0438712
BnaC08g28260D	0.000786483	-3.5315	AT3G57340	0.0438712
BnaA09g21660D	0.000786731	-3.55576	AT4G11420	0.0438712
BnaA09g22840D	0.000789291	-3.23926	AT4G09680	0.0439283
BnaC03g65890D	0.000789348	-6.15115	AT4G34670	0.0439283
BnaA07g37140D	0.000789766	-3.05788	AT1G25510	0.0439283
BnaC03g50930D	0.000789949	-4.33262	AT5G63420	0.0439283
BnaA09g34840D	0.000790993	-7.75548	AT3G55120	0.0439558
BnaC05g34550D	0.000793239	-5.55479	AT3G18610	0.0439928
BnaC09g43560D	0.000793295	-4.90152	AT5G13520	0.0439928
BnaA08g05650D	0.000793549	-0.792458	AT4G15160	0.0439928
BnaA03g35250D	0.000793857	3.22165	AT3G19490	0.0439928
BnaC03g66470D	0.000794821	-2.21174	AT4G33610	0.0440158
BnaA09g33340D	0.000800969	-2.30603	AT3G52990	0.0443256
BnaC07g19710D	0.000803209	-3.85561	AT5G46930	0.0444189
BnaUnng03450D	0.000804066	-1.49149	AT3G30460	0.0444229
BnaC03g62120D	0.000804391	-3.39216	AT3G14130	0.0444229
BnaC02g44250D	0.000806277	-1.08727	AT5G19390	0.0444964
BnaC02g39850D	0.000807148	-3.28462	AT5G27760	0.0445138
BnaA06g17070D	0.000808663	-9.90552	AT3G47833	0.0445666
BnaA05g19700D	0.000810972	-5.83947	AT3G21465	0.0446528
BnaA10g02770D	0.000811342	-10.704	AT1G04630	0.0446528
BnaC03g64750D	0.000812031	-5.53668	AT5G11250	0.04466
BnaA03g17710D	0.000812908	-2.77395	/	0.0446776
BnaA02g35900D	0.000814322	-2.06212	AT1G75180	0.0446995
BnaA02g17380D	0.000814423	-2.74065	/	0.0446995
BnaA08g13190D	0.000817468	-5.99647	AT4G30160	0.0448315
BnaCnng26200D	0.000817948	-3.84312	AT1G69295	0.0448315
BnaCnng78040D	0.000819538	-2.33904	AT4G01883	0.0448879
BnaC09g25270D	0.00082038	-4.5363	/	0.0449033
BnaC04g38420D	0.000821227	-6.72139	AT2G27190	0.044919
BnaC02g25730D	0.000822369	-1.8904	/	0.0449474
BnaA09g27540D	0.00082287	-3.53304	AT1G28110	0.0449474
BnaA08g28190D	0.000824684	-4.62644	AT1G05120	0.0449947
BnaA04g09740D	0.000825074	-5.57736	AT5G39940	0.0449947
BnaC09g01380D	0.000825421	-3.19348	AT3G27260	0.0449947
BnaAnng37030D	0.00082692	-2.2219	AT1G76490	0.0450343
BnaC07g46080D	0.000827272	8.19143	AT4G36550	0.0450343
BnaCnng02440D	0.000828794	-12.1361	AT4G00310	0.0450865
BnaC09g04440D	0.00082944	-2.46427	AT5G24400	0.045091
BnaAnng08080D	0.000830933	1.39547	AT5G51700	0.0451416
BnaC06g38980D	0.000831741	-4.84839	AT1G78560	0.0451548
BnaA09g06530D	0.000835316	-4.00681	AT5G63320	0.0453182
BnaAnng40650D	0.000836759	3.17931	AT5G05440	0.0453657
BnaC05g09550D	0.000840036	-3.96015	AT1G72860	0.0455126
BnaC03g30050D	0.00084275	-3.43502	AT4G04940	0.0456288
BnaC03g49430D	0.000843759	-9.00914	AT5G64830	0.0456321
BnaAnng33110D	0.000843953	5.29155	AT1G78940	0.0456321
BnaA09g03960D	0.000845708	-1.90707	/	0.0456712
BnaCnng23940D	0.000846171	-1.59108	AT5G61020	0.0456712
BnaA08g03780D	0.000846387	-4.7964	AT1G47480	0.0456712
BnaA09g34480D	0.000854663	-7.12994	AT3G54650	0.0460868
BnaA06g28940D	0.000855449	-10.5021	AT3G05040	0.0460981
BnaA03g52920D	0.000856935	-5.5163	AT4G34588	0.0461162
BnaA06g16180D	0.000857323	-1.92678	AT3G49080	0.0461162
BnaC08g02620D	0.00085781	-3.13554	AT1G49600	0.0461162
BnaC02g13590D	0.000858392	-1.43077	AT5G54630	0.0461162
BnaA08g31650D	0.000858665	-2.58407	AT1G11680	0.0461162
BnaC02g34780D	0.000859861	-2.09281	AT2G02790	0.0461495
BnaA02g14320D	0.000860778	-1.52829	AT1G26670	0.0461678
BnaC05g14280D	0.000862604	-7.18768	AT1G18600	0.0462348
BnaC08g36020D	0.000864643	-6.47584	AT2G21120	0.046292
BnaA09g52920D	0.000864828	-1.73327	AT2G19170	0.046292
BnaA09g07460D	0.000866177	-1.68399	AT5G67340	0.0463162
BnaC03g16020D	0.000866437	1.30785	AT5G51290	0.0463162
BnaA02g17120D	0.00086774	-2.83782	AT1G75080	0.0463546
BnaA08g30450D	0.000868313	-4.39847	AT4G20270	0.0463546
BnaA02g14690D	0.000868942	-2.43944	AT1G69290	0.0463573
BnaC01g07710D	0.000870445	-3.29824	AT4G30650	0.0464065
BnaA05g29430D	0.000873201	-1.21783	AT3G08770	0.0465225
BnaC07g40800D	0.000875258	-6.28538	AT4G27250	0.0466011
BnaA08g19190D	0.000877213	5.49762	AT1G24620	0.0466741
BnaC07g31620D	0.000877817	-4.87712	AT3G49990	0.0466753
BnaC03g67370D	0.000879577	-10.601	AT4G31810	0.0467111
BnaA08g30010D	0.000879658	4.51982	AT5G35660	0.0467111
BnaC05g28630D	0.000881339	-10.2287	AT1G32440	0.0467694
BnaAnng35340D	0.00088419	-3.26394	AT1G17147	0.0468701
BnaA10g24550D	0.000884408	2.1877	AT5G05965	0.0468701
BnaA06g13840D	0.000886756	-4.25306	AT1G19690	0.0469535
BnaC09g25180D	0.000887154	-2.80212	/	0.0469535
BnaC03g74690D	0.000890177	-10.0744	AT3G45090	0.0470824
BnaCnng48170D	0.000892015	-8.73308	AT5G35930	0.0471173
BnaA08g08140D	0.000892599	-1.96822	AT4G16830	0.0471173
BnaA04g05380D	0.000892602	-3.19973	AT3G52500	0.0471173
BnaA08g01510D	0.000895114	9.15528	AT1G52310	0.0472187
BnaA08g01240D	0.000895752	2.73237	AT1G53250	0.0472213
BnaA02g04680D	0.000897351	-6.38499	AT5G20070	0.0472713
BnaC03g58280D	0.000897882	-9.0208	AT1G28110	0.0472713
BnaA04g07300D	0.000899166	-5.59227	AT4G12650	0.0472857
BnaA10g20660D	0.000899336	-1.83594	AT5G11950	0.0472857
BnaA08g02650D	0.000901568	-10.5786	AT1G49480	0.047372
BnaC03g51350D	0.000906566	-12.1068	AT5G62910	0.0476033
BnaAnng26770D	0.000907627	-2.94832	AT5G67150	0.0476278
BnaA05g02440D	0.000909962	4.33652	AT2G41810	0.0477191
BnaA06g23070D	0.000911847	-2.02891	AT5G63940	0.0477866
BnaA08g20710D	0.000915069	-6.64466	AT1G22950	0.0479046
BnaCnng18860D	0.00091575	4.7036	AT4G17330	0.0479046
BnaC05g40560D	0.000915893	-2.70947	AT3G12670	0.0479046
BnaA10g00450D	0.000917696	-6.17674	AT1G01500	0.0479676
BnaC05g29540D	0.000920421	-3.17385	AT3G22930	0.0480787
BnaC05g09110D	0.000922663	-10.2475	AT1G13060	0.0481643
BnaC09g01250D	0.000925672	-2.05189	AT3G26935	0.0482899
BnaA05g19950D	0.000928134	-1.91772	AT3G21100	0.0483868
BnaC02g46520D	0.000933459	-3.93371	AT1G80670	0.0486043
BnaC03g68990D	0.000934298	-5.64837	AT1G58160	0.0486043
BnaA03g08070D	0.000934314	-1.56373	AT5G20290	0.0486043
BnaC02g29760D	0.000935111	-2.19313	AT5G42150	0.0486043
BnaC05g11480D	0.000935753	-7.33639	AT1G15200	0.0486043
BnaC02g37590D	0.000935948	-2.13382	AT3G28910	0.0486043
BnaC02g33380D	0.000939138	-2.05172	AT5G47620	0.0487384
BnaC02g31930D	0.00094093	-1.35326	AT5G45930	0.0487998
BnaA02g35820D	0.000941759	-6.64758	AT1G69070	0.0488112
BnaAnng35740D	0.000944622	-1.74493	AT2G01850	0.0489279
BnaA07g28660D	0.000945388	-2.36319	AT1G70140	0.0489359
BnaA01g29170D	0.000946687	-11.4076	AT3G14800	0.0489715
BnaC09g19910D	0.000948244	-8.10648	AT5G47020	0.0489716
BnaA08g12920D	0.000948626	1.69209	AT5G18065	0.0489716
BnaC07g26130D	0.000948823	-7.80271	AT3G30841	0.0489716
BnaA08g17680D	0.000949136	-4.39713	AT1G29820	0.0489716
BnaC02g41810D	0.000950854	-2.57636	AT5G60830	0.0490287
BnaC03g55640D	0.000953095	-2.49151	AT5G59910	0.0491126
BnaA07g38350D	0.000955393	-3.53144	AT1G80270	0.0491993
BnaA02g14600D	0.000959964	-2.19493	AT1G69210	0.0493741
BnaC09g40000D	0.000960507	-4.31492	AT4G16470	0.0493741
BnaC08g05950D	0.000960635	-10.1432	AT1G78300	0.0493741
BnaAnng33520D	0.000962853	-2.96014	AT1G50240	0.049451
BnaC08g16740D	0.000963488	-9.22812	AT1G15700	0.049451
BnaAnng40540D	0.000964813	-7.12835	AT5G61790	0.049451
BnaA07g38600D	0.000966361	-1.65337	AT3G26100	0.049451
BnaC02g47300D	0.00096654	-2.11619	AT5G46030	0.049451
BnaA02g33430D	0.000966788	-6.79282	AT5G62500	0.049451
BnaC05g07760D	0.000966928	-5.98559	AT1G10010	0.049451
BnaC08g20790D	0.000967073	-7.67669	AT3G49100	0.049451
BnaC02g34540D	0.000971952	-3.12002	AT2G02450	0.0496688
BnaC09g01310D	0.000975111	-2.17225	AT3G27020	0.0497985
BnaA05g06800D	0.000976168	1.31022	AT2G37790	0.0498207
BnaC03g76300D	0.000978661	-6.98675	AT5G05330	0.0499161

## Sheet: ST8
Table S8. List of genes associated with lipid metabolism among those TWAS significant genes for fatty acids at 20 DAF
Gene	Lmm_p	Tair	Name	Annotation	Trait
BnaA09g33340D	3.64e-05	AT3G52990	PK	Pyruvate kinase	C16:0
BnaA01g16660D	1.36e-11	AT4G27780	ACBP	Acyl CoA Binding Protein	C18:0
BnaA01g18160D	3.5e-09	AT4G16760	ACX	Acyl-CoA Oxidase	C18:0
BnaC02g33660D	1.3e-08	AT2G01140	FBA	Fructose 1,6 bis phosphate aldolase	C18:1
BnaC02g33900D	6.23e-08	AT2G01320	ABCG7	ABC transporter G family member 7	C18:1
BnaC02g47130D	3.67e-06	AT5G46110	TPT	Triose phosphate translocator	C18:1
BnaC02g27480D	8.83e-06	AT4G00520	ACT	Acyl-CoA Thioesterase	C18:1
BnaC02g33390D	1.01e-05	AT5G47630	ACP	Acyl Carrier Protein	C18:1
BnaC02g33900D	1.62e-06	AT2G01320	ABCG7	ABC transporter G family member 7	C18:2
BnaC02g33660D	4.24e-05	AT2G01140	FBA	Fructose 1,6 bis phosphate aldolase	C18:2
BnaA02g13310D	6.61722e-05	AT1G67730	KCR	Ketoacyl-CoA Reductase	C18:2
BnaA07g36830D	0.000110452	AT1G24470	KCR	Ketoacyl-CoA Reductase	C18:3
BnaC05g21140D	0.000366743	AT1G24360	KAR	Ketoacyl-ACP Reductase	C18:3
BnaA09g44650D	0.000452571	AT1G18280	LTP	Lipid Transfer Protein	C18:3
BnaA01g30320D	0.000571545	AT3G12780	PGK	3-Phosphoglycerate kinase	C18:3
BnaC02g33900D	1.98e-07	AT2G01320	ABCG7	ABC transporter G family member 7	C20:1
BnaC02g33660D	2.03e-07	AT2G01140	FBA	Fructose 1,6 bis phosphate aldolase	C20:1
BnaC02g47130D	2.26e-06	AT5G46110	TPT	Triose phosphate translocator	C20:1
BnaC02g27480D	0.000125747	AT4G00520	ACT	Acyl-CoA Thioesterase	C20:1
BnaA02g13310D	0.000188153	AT1G67730	KCR	Ketoacyl-CoA Reductase	C20:1
BnaCnng65700D	0.000206174	AT5G19290	MAGL	Monoacylglycerol Lipase	C20:1
BnaA09g52300D	0.000232473	AT5G63680	PK	Pyruvate kinase	C20:1
BnaC02g30500D	0.000384502	AT5G43760	KCS	Ketoacyl-CoA Synthase	C20:1
BnaC02g39790D	0.000719074	AT5G27630	ACBP	Acyl CoA Binding Protein	C20:1
BnaA02g12050D	0.00086028	AT1G65290	ACP	Acyl Carrier Protein	C20:1
BnaC02g33660D	3.6e-08	AT2G01140	FBA	Fructose 1,6 bis phosphate aldolase	C22:1
BnaC02g33900D	6.01e-08	AT2G01320	ABCG7	ABC transporter G family member 7	C22:1
BnaA09g33340D	2.42e-06	AT3G52990	PK	Pyruvate kinase	C22:1
BnaA02g12050D	5.82e-05	AT1G65290	ACP	Acyl Carrier Protein	C22:1
BnaC02g27480D	5.95748e-05	AT4G00520	ACT	Acyl-CoA Thioesterase	C22:1
BnaA08g07320D	9.56e-05	AT5G33320	PPT1	Phosphoenolpyruvate transporter	C22:1
BnaC02g33390D	9.79e-05	AT5G47630	ACP	Acyl Carrier Protein	C22:1
BnaC02g39790D	0.000225267	AT5G27630	ACBP	Acyl CoA Binding Protein	C22:1
BnaA02g13310D	0.00029468	AT1G67730	KCR	Ketoacyl-CoA Reductase	C22:1
BnaC02g30500D	0.000494857	AT5G43760	KCS	Ketoacyl-CoA Synthase	C22:1
BnaA02g26990D	0.000613243	AT2G01320	ABCG7	ABC transporter G family member 7	C22:1
BnaA10g28500D	0.000615296	AT1G45201	TAGL	Triacylglycerol Lipase	C22:1
BnaA03g10100D	0.000853342	AT5G57800	CER3	CER3 Protein	C22:1

## Sheet: ST9
Table S9. List of genes associated with lipid metabolism among those TWAS significant genes for fatty acids at 40 DAF
Gene	Lmm_p	Tair	Name	Annotation	Trait
BnaA08g03050D	2.79e-06	AT1G48750	LTP	Lipid Transfer Protein	C16:0
BnaA07g08340D	2.78115e-05	AT3G25110	FATA	Acyl-ACP Thioesterase A	C16:0
BnaCnng14430D	5.2737e-05	AT1G08650	PPCK	Phosphoenolpyruvate carboxylase kinase 1	C16:0
BnaC02g33900D	0.000105019	AT2G01320	ABCG7	ABC transporter G family member 7	C16:0
BnaA06g03380D	0.000145651	AT5G56630	PFK7	ATP-dependent 6-phosphofructokinase 7	C16:0
BnaC06g16630D	0.000248237	AT3G58550	LTP	Lipid Transfer Protein	C16:0
BnaA08g11130D	0.000277072	AT4G34520	KCS	Ketoacyl-CoA Synthase	C16:0
BnaC03g65980D	0.000409399	AT4G34520	KCS	Ketoacyl-CoA Synthase	C16:0
BnaC08g44620D	4.51423e-05	AT1G06090	ADS	Acyl-CoA Desaturase-like	C18:0
BnaC04g06200D	0.000333751	AT2G39350	ABCG1	ABC transporter G family member 1	C18:0
BnaA09g48610D	0.000346035	AT1G08980	FAAH	Fatty Acid Amide Hydrolase	C18:0
BnaA06g03380D	0.00046162	AT5G56630	PFK7	ATP-dependent 6-phosphofructokinase 7	C18:0
BnaA08g30000D	0.000536835	AT5G35790	G6PDH1	Glucose-6-phosphate 1-dehydrogenase	C18:0
BnaA08g03050D	0.000574491	AT1G48750	LTP	Lipid Transfer Protein	C18:0
BnaAnng41100D	1.52251e-08	AT1G36160	HmACC	Acetyl-CoA Carboxylase (Homomeric)	C18:1
BnaA08g30000D	1.45e-07	AT5G35790	G6PDH1	Glucose-6-phosphate 1-dehydrogenase	C18:1
BnaC02g33660D	1.46e-07	AT2G01140	FBA	Fructose 1,6 bis phosphate aldolase	C18:1
BnaC02g33900D	1.86984e-07	AT2G01320	ABCG7	ABC transporter G family member 7	C18:1
BnaA08g11130D	3.07e-07	AT4G34520	KCS18	3-ketoacyl-CoA synthase 18	C18:1
BnaC09g06050D	1.87e-06	AT5G63680	PK	Pyruvate kinase	C18:1
BnaA06g03380D	3.81202e-06	AT5G56630	PFK7	ATP-dependent 6-phosphofructokinase 7	C18:1
BnaC09g06060D	3.82e-06	AT5G63680	PK	Pyruvate kinase	C18:1
BnaC02g39790D	1.11286e-05	AT5G27630	ACBP5	Acyl-CoA-binding domain-containing protein	C18:1
BnaA02g12050D	2.8e-05	AT1G65290	ACP	Acyl Carrier Protein	C18:1
BnaA08g23810D	3.05e-05	AT1G15500	NTT2	Nucleoside triphosphate transporter	C18:1
BnaA04g06560D	3.07e-05	AT4G13840	CER2	CER2-like Protein	C18:1
BnaC01g29930D	3.66e-05	AT1G61800	GPT2	Glucose 6 phosphate:phosphate translocator	C18:1
BnaC08g08150D	4.12e-05	AT5G33320	PPT1	Phosphoenolpyruvate transporter	C18:1
BnaA08g03050D	4.61e-05	AT1G48750	LTP	Lipid Transfer Protein	C18:1
BnaA08g11440D	5.25327e-05	AT4G33790	AlcFAR	Alcohol-forming Fatty Acyl-CoA Reductase	C18:1
BnaA10g17100D	9.38373e-05	AT5G17630	XPT	Xylulose 5-phosphate translocator	C18:1
BnaC06g16630D	0.000126379	AT3G58550	LTP	Lipid Transfer Protein	C18:1
BnaC09g11930D	0.000208292	AT1G64190	6PGDH	6-phosphogluconate dehydrogenase	C18:1
BnaC02g33390D	0.000209605	AT5G47630	ACP	Acyl Carrier Protein	C18:1
BnaCnng65700D	0.000210555	AT5G19290	MAGL	Monoacylglycerol Lipase	C18:1
BnaA08g01230D	0.000225421	AT1G53270	ABCG10	ABC transporter G family member 10	C18:1
BnaC02g28920D	0.000246702	AT4G11030	LACS	Long-Chain Acyl-CoA Synthetase	C18:1
BnaA04g07120D	0.000252121	AT4G13050	FATA	Acyl-ACP Thioesterase A	C18:1
BnaC03g60720D	0.000348797	AT4G39850	ABCAT	ABC Acyl Transporter	C18:1
BnaC05g28630D	0.000420148	AT1G32440	pPK	Pyruvate kinase	C18:1
BnaC08g26140D	0.000537204	AT3G55360	ECR	Enoyl-CoA Reductase	C18:1
BnaA02g13310D	0.000571869	AT1G67730	KCR	Ketoacyl-CoA Reductase	C18:1
BnaA07g24600D	0.000587681	AT1G68530	KCS	Ketoacyl-CoA Synthase	C18:1
BnaC03g74690D	0.000594348	AT3G45090	PGK	3-Phosphoglycerate kinase	C18:1
BnaA05g29430D	0.000661615	AT3G08770	LTP	Lipid Transfer Protein	C18:1
BnaA07g29760D	0.000705583	AT1G71960	ABCG25	ABC transporter G family member 25	C18:1
BnaA02g19260D	0.000718772	AT1G79550	PGK	3-Phosphoglycerate kinase	C18:1
BnaC08g35040D	0.000741505	AT2G22480	PFK5	ATP-dependent 6-phosphofructokinase 5	C18:1
BnaC08g24540D	0.000932757	AT3G53510	ABCG20	ABC transporter G family member 20	C18:1
BnaA03g35780D	1.68526e-05	AT3G20510	FAX6	Protein FATTY ACID EXPORT 6	C18:2
BnaC06g16630D	2.18e-05	AT3G58550	LTP	Lipid Transfer Protein	C18:2
BnaA08g03050D	0.00016416	AT1G48750	LTP	Lipid Transfer Protein	C18:2
BnaA07g08340D	0.000347528	AT3G25110	FATA	Acyl-ACP Thioesterase A	C18:2
BnaA08g12780D	0.000351185	AT4G30950	FAD6	Omega-6 fatty acid desaturase	C18:2
BnaA08g29340D	0.000363696	AT4G14815	LTP	Lipid Transfer Protein	C18:2
BnaA06g03380D	0.000391259	AT5G56630	PFK7	ATP-dependent 6-phosphofructokinase 7	C18:2
BnaA07g26670D	0.000505864	AT1G67730	KCR	Ketoacyl-CoA Reductase	C18:2
BnaC01g00070D	0.000604091	AT4G38970	FBA	Fructose 1,6 bis phosphate aldolase	C18:2
BnaC02g33900D	0.000741089	AT2G01320	ABCG7	ABC transporter G family member 7	C18:2
BnaAnng41100D	5.04745e-08	AT1G36160	HmACC	Acetyl-CoA Carboxylase (Homomeric)	C20:1
BnaC02g33900D	1.19e-06	AT2G01320	ABCG7	ABC transporter G family member 7	C20:1
BnaA08g11130D	1.84e-06	AT4G34520	KCS	Ketoacyl-CoA Synthase	C20:1
BnaC02g33660D	1.97e-06	AT2G01140	FBA	Fructose 1,6 bis phosphate aldolase	C20:1
BnaC09g06050D	2.38e-06	AT5G63680	PK	Pyruvate kinase	C20:1
BnaA06g03380D	8.02364e-06	AT5G56630	PFK7	ATP-dependent 6-phosphofructokinase 7	C20:1
BnaC03g65980D	9.30291e-06	AT4G34520	KCS	Ketoacyl-CoA Synthase	C20:1
BnaC09g06060D	1.68372e-05	AT5G63680	PK	Pyruvate kinase	C20:1
BnaC01g29930D	2.6725e-05	AT1G61800	GPT2	Glucose 6 phosphate:phosphate translocator	C20:1
BnaA04g06560D	3.00912e-05	AT4G13840	CER2	CER2-like Protein	C20:1
BnaA08g11440D	3.62952e-05	AT4G33790	AlcFAR	Alcohol-forming Fatty Acyl-CoA Reductase	C20:1
BnaC06g19090D	0.000172109	AT1G80300	NTT1	Nucleoside triphosphate transporter	C20:1
BnaC08g08150D	0.000214262	AT5G33320	PPT1	Phosphoenolpyruvate transporter	C20:1
BnaC02g47130D	0.000238578	AT5G46110	TPT	Triose phosphate translocator	C20:1
BnaC03g16520D	0.000249332	AT2G29980	FAD3	Omega-3 fatty acid desaturase	C20:1
BnaA02g09070D	0.000304331	AT5G55370	WS	Wax Synthase	C20:1
BnaC02g39790D	0.000318455	AT5G27630	ACBP5	Acyl-CoA-binding domain-containing protein	C20:1
BnaA02g12050D	0.000332762	AT1G65290	ACP	Acyl Carrier Protein	C20:1
BnaA03g51030D	0.000550887	AT4G34250	KCS16	3-ketoacyl-CoA synthase 16	C20:1
BnaA04g17370D	0.00059451	AT2G30200	MCMT	Malonyl-CoA : ACP Malonyltransferase	C20:1
BnaCnng44950D	0.000599449	AT4G13840	CER2	CER2-like Protein	C20:1
BnaA08g23810D	0.000600779	AT1G15500	NTT2	Nucleoside triphosphate transporter	C20:1
BnaAnng41100D	1.1184e-07	AT1G36160	HmACC	Acetyl-CoA Carboxylase (Homomeric)	C22:1
BnaC02g33900D	3.74289e-07	AT2G01320	ABCG7	ABC transporter G family member 7	C22:1
BnaC02g33660D	4.16e-07	AT2G01140	FBA	Fructose 1,6 bis phosphate aldolase	C22:1
BnaA08g11130D	6.94707e-07	AT4G34520	KCS18	3-ketoacyl-CoA synthase 18	C22:1
BnaA06g03380D	1.12098e-06	AT5G56630	PFK7	ATP-dependent 6-phosphofructokinase 7	C22:1
BnaA08g30000D	2.11533e-06	AT5G35790	G6PDH1	Glucose-6-phosphate 1-dehydrogenase	C22:1
BnaA08g03050D	2.48088e-06	AT1G48750	LTP	Lipid Transfer Protein	C22:1
BnaC09g06050D	4.00187e-06	AT5G63680	PK	Pyruvate kinase	C22:1
BnaC09g06060D	1.27983e-05	AT5G63680	PK	Pyruvate kinase	C22:1
BnaC03g65980D	1.77978e-05	AT4G34520	KCS18	3-ketoacyl-CoA synthase 18	C22:1
BnaC02g39790D	1.96993e-05	AT5G27630	ACBP5	Acyl-CoA-binding domain-containing protein	C22:1
BnaC06g16630D	3.29e-05	AT3G58550	LTP	Lipid Transfer Protein	C22:1
BnaA02g12050D	3.5273e-05	AT1G65290	ACP	Acyl Carrier Protein	C22:1
BnaA04g06560D	4.15639e-05	AT4G13840	CER2	CER2-like Protein	C22:1
BnaC06g19090D	5.02141e-05	AT1G80300	NTT1	Nucleoside triphosphate transporter	C22:1
BnaC02g47130D	0.000107298	AT5G46110	TPT	Triose phosphate translocator	C22:1
BnaC08g08150D	0.000114933	AT5G33320	PPT1	Phosphoenolpyruvate transporter	C22:1
BnaA02g09070D	0.000123454	AT5G55370	WS	Wax Synthase	C22:1
BnaA09g16350D	0.000125083	AT5G43280	DCI	Dienoyl CoA Isomerase	C22:1
BnaA08g23810D	0.000135821	AT1G15500	NTT2	Nucleoside triphosphate transporter	C22:1
BnaA10g17100D	0.000140045	AT5G17630	XPT	Xylulose 5-phosphate translocator	C22:1
BnaCnng65700D	0.000153295	AT5G19290	MAGL	Monoacylglycerol Lipase	C22:1
BnaA08g11440D	0.00020566	AT4G33790	AlcFAR	Alcohol-forming Fatty Acyl-CoA Reductase	C22:1
BnaC01g29930D	0.000216832	AT1G61800	GPT2	Glucose 6 phosphate:phosphate translocator	C22:1
BnaA04g07120D	0.000237682	AT4G13050	FATA	Acyl-ACP Thioesterase A	C22:1
BnaCnng44950D	0.000258928	AT4G13840	CER2	CER2-like Protein	C22:1
BnaC02g28920D	0.000273145	AT4G11030	LACS5	Long chain acyl-CoA synthetase 5	C22:1
BnaCnng19590D	0.000367297	AT5G57800	CER3	CER3 Protein	C22:1
BnaA03g51030D	0.000370515	AT4G34250	KCS16	3-ketoacyl-CoA synthase 16	C22:1
BnaC03g60720D	0.000498489	AT4G39850	ABCAT	ABC Acyl Transporter	C22:1
BnaC02g33390D	0.0005248	AT5G47630	ACP	Acyl Carrier Protein	C22:1
BnaA02g13310D	0.000544392	AT1G67730	KCR	Ketoacyl-CoA Reductase	C22:1
BnaC09g11930D	0.00054785	AT1G64190	6PGDH	6-phosphogluconate dehydrogenase	C22:1
BnaA07g08340D	0.000574222	AT3G25110	FATA	Acyl-ACP Thioesterase A	C22:1
BnaA07g24600D	0.000581064	AT1G68530	KCS6	3-ketoacyl-CoA synthase 6	C22:1
BnaA08g01230D	0.000591969	AT1G53270	ABCG10	ABC transporter G family member 10	C22:1
BnaC03g45040D	0.000654012	AT2G05990	ER	Enoyl-ACP Reductase	C22:1
BnaC02g39080D	0.000676309	AT5G49460	ACLB-2	ATP Citrate Lyase B subunit	C22:1
BnaA07g29760D	0.000689489	AT1G71960	ABCG25	ABC transporter G family member 25	C22:1
BnaA09g33340D	0.000800969	AT3G52990	PK	Pyruvate kinase	C22:1
BnaA05g29430D	0.000873201	AT3G08770	LTP	Lipid Transfer Protein	C22:1
BnaC05g28630D	0.000881339	AT1G32440	pPK	Pyruvate kinase	C22:1
BnaC03g74690D	0.000890177	AT3G45090	PGK	3-Phosphoglycerate kinase	C22:1

## Sheet: ST10
Table S10. List of differentially expressed genes between CR and WT
Gene	SampleA	SampleB	Log2FoldChange	Pvalue	Padj	Ara gene	Description
BnaA05g05410D	CR	WT	-11.0073	2.64257e-20	1.76065e-18	AT2G40370	Laccase-5
BnaC04g49900D	CR	WT	-8.52035	4.60949e-12	1.46526e-10	AT3G03130	Unknown protein
BnaC03g36310D	CR	WT	-8.33891	1.78314e-11	5.28214e-10	AT3G08900	UDP-arabinopyranose mutase 3
BnaC06g35920D	CR	WT	-7.76002	6.26323e-10	1.52163e-08	AT1G75150	Unknown protein
BnaC03g03170D	CR	WT	-7.71821	2.58353e-09	5.78969e-08	AT5G07572	Unknown protein
BnaA02g08390D	CR	WT	-7.48315	4.79171e-09	1.0201e-07	AT5G57000	Unknown protein
BnaC07g29370D	CR	WT	-7.40165	2.80807e-09	6.26097e-08	AT5G25390	SHN Transcription Factors factor SHINE 3
BnaC04g39650D	CR	WT	-7.26189	2.43154e-08	4.63093e-07	AT2G28315	Nucleotide/sugar transporter family protein
BnaA03g02140D	CR	WT	-7.21792	2.1748e-08	4.1857e-07	AT5G07572	Unknown protein
BnaA07g03710D	CR	WT	-7.15072	1.73724e-24	1.55199e-22	AT5G42180	Peroxidase 64
BnaC05g33290D	CR	WT	-7.10203	1.3034e-08	2.59083e-07	AT4G30880	LTP; Lipid Transfer Protein; Fatty Acid Elongation & Wax Biosynthesis
BnaC05g25270D	CR	WT	-7.05779	1.26777e-07	2.1552e-06	AT1G31335	Unknown protein
BnaA01g17280D	CR	WT	-7.03446	1.55511e-07	2.60453e-06	AT4G16500	Cysteine proteinase inhibitor 4
BnaC03g67860D	CR	WT	-7.02462	2.17299e-08	4.1857e-07	AT4G30880	LTP; Lipid Transfer Protein; Fatty Acid Elongation & Wax Biosynthesis
BnaC07g05770D	CR	WT	-6.96273	2.76127e-27	3.03555e-25	AT5G42180	Peroxidase 64
BnaA10g20230D	CR	WT	-6.92282	2.19104e-07	3.58761e-06	AT5G13060	ARMADILLO BTB ARABIDOPSIS PROTEIN 1
BnaC04g02550D	CR	WT	-6.75264	4.10706e-07	6.39673e-06	AT2G42260	Protein POLYCHOME
BnaA07g20530D	CR	WT	-6.69775	1.0693e-07	1.84475e-06	AT1G78430	Interactor of constitutive active ROPs 4
BnaA07g03580D	CR	WT	-6.65655	1.42485e-07	2.40469e-06	AT2G16270	Unknown protein
BnaAnng18940D	CR	WT	-6.62277	7.56306e-07	1.11063e-05	AT1G56100	Plant invertase/pectin methylesterase inhibitor superfamily protein
BnaA06g25150D	CR	WT	-6.59641	1.0877e-06	1.53998e-05	AT2G18570	UDP-glycosyltransferase 72D1
BnaA09g39520D	CR	WT	-6.47136	1.97616e-06	2.65474e-05	AT3G61950	Transcription factor bHLH67
BnaC09g47970D	CR	WT	-6.45504	1.78457e-06	2.41953e-05	AT5G08000	PLASMODESMATA CALLOSE-BINDING PROTEIN 2
BnaC03g35470D	CR	WT	-6.44735	4.43705e-07	6.86208e-06	AT3G07800	Thymidine kinase
BnaC06g20370D	CR	WT	-6.29108	4.48515e-06	5.58365e-05	AT1G78430	Interactor of constitutive active ROPs 4
BnaCnng31580D	CR	WT	-6.18564	7.71023e-06	9.13046e-05	AT1G12663	Thionin-like protein 2
BnaC09g48330D	CR	WT	-6.1742	3.27476e-06	4.19288e-05	AT5G07160	Basic-leucine zipper (bZIP) transcription factor family protein
BnaC08g25520D	CR	WT	-6.17307	1.05863e-05	0.000121615	AT3G54770	Probable RNA-binding protein ARP1
BnaC02g17500D	CR	WT	-6.08618	2.82956e-06	3.68364e-05	AT1G67750	Probable pectate lyase 5
BnaC02g16820D	CR	WT	-6.08396	1.4026e-05	0.000156717	AT5G67620	Unknown protein
BnaC03g03340D	CR	WT	-6.06196	1.08101e-14	4.57072e-13	AT5G08020	Replication protein A 70 kDa DNA-binding subunit B
BnaA02g27430D	CR	WT	-5.99308	3.1057e-05	0.000319523	AT2G04033	Encodes a defensin-like (DEFL) family protein.
BnaC03g41510D	CR	WT	-5.93677	2.93762e-05	0.000304582	AT3G20300	Protein of unknown function (DUF3537)
BnaC01g09220D	CR	WT	-5.92014	4.74958e-05	0.000462409	AT4G29310	Protein of unknown function (DUF1005)
BnaC07g43070D	CR	WT	-5.91925	3.64419e-05	0.000366792	AT4G31020	alpha/beta-Hydrolases superfamily protein
BnaA01g29530D	CR	WT	-5.91604	3.69761e-05	0.000371224	AT3G14190	Unknown protein
BnaC03g12030D	CR	WT	-5.9021	3.63671e-05	0.000366225	AT5G59370	Actin-4
BnaA10g19760D	CR	WT	-5.88236	3.76076e-05	0.000376859	AT5G13600	Putative BTB/POZ domain-containing protein At5g13600
BnaA08g08620D	CR	WT	-5.86867	4.27298e-05	0.00042182	AT4G18210	Probable purine permease 10
BnaC07g36040D	CR	WT	-5.79744	5.80323e-05	0.000553552	AT3G32904	Unknown protein
BnaC08g33820D	CR	WT	-5.79635	5.97174e-05	0.000567983	AT2G24700	B3 domain-containing protein REM10
BnaA10g23610D	CR	WT	-5.77419	0.000194693	0.00159198	AT5G07160	Basic-leucine zipper (bZIP) transcription factor family protein
BnaA05g24810D	CR	WT	-5.76928	2.2793e-05	0.000243207	AT3G14740	RING/FYVE/PHD zinc finger superfamily protein
BnaA02g05090D	CR	WT	-5.73928	8.68464e-05	0.000789215	AT5G20810	SAUR-like auxin-responsive protein family
BnaA04g27830D	CR	WT	-5.73452	0.000102639	0.000911381	AT5G39865	Uncharacterized protein At5g39865
BnaA04g19810D	CR	WT	-5.67619	0.000118627	0.0010342	AT2G33793	Unknown protein
BnaC09g30230D	CR	WT	-5.67345	1.10318e-12	3.79977e-11	AT5G53870	early nodulin-like protein 1
BnaA03g31000D	CR	WT	-5.66532	9.63009e-08	1.67378e-06	AT3G08900	UDP-arabinopyranose mutase 3
BnaC08g33170D	CR	WT	-5.65665	0.000131553	0.0011323	AT2G26040	Abscisic acid receptor PYL2
BnaC05g38850D	CR	WT	-5.62286	4.10296e-05	0.000407066	AT3G14740	RING/FYVE/PHD zinc finger superfamily protein
BnaC06g36190D	CR	WT	-5.60487	2.82142e-05	0.000294076	AT1G75430	BEL1-like homeodomain protein 11
BnaA10g10070D	CR	WT	-5.59679	3.56656e-10	8.94489e-09	AT5G11660	Protein of Unknown Function (DUF239)
BnaC03g61620D	CR	WT	-5.53695	0.00037429	0.00279964	AT5G11250	Disease resistance protein (TIR-NBS-LRR class)
BnaC05g43660D	CR	WT	-5.53135	5.52127e-12	1.7425e-10	AT3G08900	UDP-arabinopyranose mutase 3
BnaA02g08300D	CR	WT	-5.51327	4.49906e-05	0.000441166	AT5G57180	Protein CHLOROPLAST IMPORT APPARATUS 2
BnaC03g47840D	CR	WT	-5.44276	5.69284e-05	0.000544203	AT2G17620	Cyclin-B2-1
BnaC03g15460D	CR	WT	-5.43165	6.24628e-05	0.00059097	/	/
BnaC04g10630D	CR	WT	-5.40651	9.43791e-05	0.000847407	AT2G34600	Protein TIFY 5B
BnaC04g04810D	CR	WT	-5.36565	3.04849e-35	5.3621e-33	AT2G40370	Laccase-5
BnaA02g18500D	CR	WT	-5.34878	9.09022e-05	0.000821732	AT1G77240	Probable acyl-activating enzyme 4
BnaC09g13560D	CR	WT	-5.31671	2.72225e-06	3.56033e-05	AT1G62400	Protein kinase superfamily protein
BnaCnng78040D	CR	WT	-5.31306	4.53656e-13	1.63217e-11	AT4G01883	Polyketide cyclase / dehydrase and lipid transport protein
BnaA09g47290D	CR	WT	-5.29817	1.55634e-08	3.06436e-07	AT1G12240	BFRUCT4; Invertase; Vacuole; Acid beta-fructofuranosidase 4%2C vacuolar
BnaC05g23060D	CR	WT	-5.24492	0.000150546	0.00127717	AT1G30135	Protein TIFY 5A
BnaA05g37110D	CR	WT	-5.22602	3.23236e-34	5.33015e-32	AT3G08900	UDP-arabinopyranose mutase 3
BnaA10g14750D	CR	WT	-5.20349	3.83915e-08	7.0966e-07	AT5G20740	Plant invertase/pectin methylesterase inhibitor superfamily protein
BnaA04g26470D	CR	WT	-5.18791	9.75943e-17	4.92652e-15	AT2G45830	downstream target of AGL15 2
BnaA10g22020D	CR	WT	-5.17712	0.000186188	0.00153384	AT5G10220	Annexin D6
BnaC03g04890D	CR	WT	-5.14651	4.00097e-23	3.2648e-21	AT5G11660	Protein of Unknown Function (DUF239)
BnaA01g35340D	CR	WT	-5.11887	8.08059e-12	2.49452e-10	AT4G17340	Probable aquaporin TIP2-2
BnaC04g50500D	CR	WT	-5.084	1.58959e-54	8.06534e-52	AT2G45830	downstream target of AGL15 2
BnaC03g72210D	CR	WT	-5.00765	2.91885e-05	0.000302875	AT2G38620	Cyclin-dependent kinase B1-2
BnaA07g31180D	CR	WT	-4.98265	2.22181e-07	3.63498e-06	AT1G74010	Calcium-dependent phosphotriesterase superfamily protein
BnaC01g39220D	CR	WT	-4.97583	0.000911636	0.00600569	AT3G09050	Unknown protein
BnaC03g56900D	CR	WT	-4.8897	0.000619606	0.00431869	AT1G13080	Cytochrome P450 71B2
BnaC06g06830D	CR	WT	-4.88422	3.67124e-05	0.000369045	AT1G54040	Epithiospecifier protein
BnaC08g27990D	CR	WT	-4.8726	4.56039e-05	0.000446185	AT3G57060	binding
BnaC07g42500D	CR	WT	-4.84579	1.40135e-20	9.48033e-19	AT4G30270	Xyloglucan endotransglucosylase/hydrolase protein 24
BnaC01g12910D	CR	WT	-4.81745	1.56713e-06	2.14902e-05	AT4G21600	Endonuclease 5
BnaA05g31850D	CR	WT	-4.71778	0.00116965	0.00740996	AT3G05330	Probable microtubule-binding protein TANGLED
BnaA09g46100D	CR	WT	-4.66718	1.16104e-07	1.99087e-06	/	/
BnaC06g13460D	CR	WT	-4.66324	1.92409e-06	2.59006e-05	AT5G41130	Esterase/lipase/thioesterase family protein
BnaA09g30930D	CR	WT	-4.59559	0.000211915	0.00171123	AT1G23670	Domain of unknown function (DUF220)
BnaCnng43000D	CR	WT	-4.56702	4.67648e-10	1.15169e-08	AT5G51480	Monocopper oxidase-like protein SKS2
BnaA02g07120D	CR	WT	-4.53911	9.82872e-152	1.94491e-147	AT5G59310	LTP; Lipid Transfer Protein; Fatty Acid Elongation & Wax Biosynthesis; (LTP type 1); Non-specific lipid-transfer protein 4
BnaC04g51270D	CR	WT	-4.53054	0.00027946	0.00217287	AT2G47460	Transcription factor MYB12
BnaC01g07530D	CR	WT	-4.5162	1.65096e-59	1.03712e-56	AT4G30880	LTP; Lipid Transfer Protein; Fatty Acid Elongation & Wax Biosynthesis
BnaA08g00610D	CR	WT	-4.46734	2.3274e-05	0.000247738	AT1G55200	Protein kinase protein with adenine nucleotide alpha hydrolases-like domain
BnaC08g18620D	CR	WT	-4.44589	1.08925e-06	1.54068e-05	AT1G19150	photosystem I light harvesting complex gene 6
BnaC02g10060D	CR	WT	-4.4292	1.12373e-86	2.11775e-83	AT5G59310	LTP; Lipid Transfer Protein; Fatty Acid Elongation & Wax Biosynthesis; (LTP type 1); Non-specific lipid-transfer protein 4
BnaC01g21310D	CR	WT	-4.42479	3.55486e-13	1.29991e-11	AT4G17000	Unknown protein
BnaA06g14930D	CR	WT	-4.38033	1.71887e-05	0.000188125	AT1G21100	O-methyltransferase family protein
BnaC05g31940D	CR	WT	-4.36949	4.4996e-39	1.03533e-36	AT3G20130	cytochrome P450%2C family 705%2C subfamily A%2C polypeptide 22
BnaA06g39970D	CR	WT	-4.34898	1.76073e-09	4.0349e-08	AT5G47500	Probable pectinesterase 68
BnaA01g03590D	CR	WT	-4.34545	1.1062e-35	2.00822e-33	AT4G33270	Cell division cycle 20.1%2C cofactor of APC complex
BnaA07g16260D	CR	WT	-4.32637	0.000415857	0.00307338	AT3G54060	Unknown protein
BnaA09g03310D	CR	WT	-4.32185	1.48411e-11	4.44289e-10	AT5G49360	Beta-D-xylosidase 1
BnaA09g10870D	CR	WT	-4.31675	0.000782892	0.00528012	AT1G63220	C2 domain-containing protein At1g63220
BnaA07g38540D	CR	WT	-4.30756	0.000613609	0.00428671	AT3G45140	LOX; Lipoxygenase; Oxylipin Metabolism 1
BnaA08g21980D	CR	WT	-4.30593	3.70543e-13	1.34661e-11	AT1G19630	cytochrome P450%2C family 722%2C subfamily A%2C polypeptide 1
BnaC01g34800D	CR	WT	-4.27894	3.09311e-06	3.98479e-05	AT3G17140	Plant invertase/pectin methylesterase inhibitor superfamily protein
BnaC01g32490D	CR	WT	-4.23486	3.51143e-05	0.000355054	AT3G20750	GATA transcription factor 29
BnaC09g46830D	CR	WT	-4.22411	5.71102e-06	6.96301e-05	AT5G09840	Putative endonuclease or glycosyl hydrolase
BnaC09g51620D	CR	WT	-4.2207	2.0077e-06	2.69345e-05	AT1G57750	CYP450, 96A/SADH; Midchain Alkane Hydroxylase,Secondary Alcohol Dehydrogenase; Fatty Acid Elongation & Wax Biosynthesis; CYP96A15 / MAH1; Alkane hydroxylase MAH1
BnaC08g47020D	CR	WT	-4.21802	0.00053135	0.003774	AT4G13370	Plant protein of unknown function (DUF936)
BnaA06g08940D	CR	WT	-4.20301	6.45877e-05	0.000608311	AT1G14040	Phosphate transporter PHO1 homolog 3
BnaA04g07770D	CR	WT	-4.19401	3.3932e-14	1.3689e-12	AT5G36800	Unknown protein
BnaA03g41280D	CR	WT	-4.18958	1.55881e-06	2.13909e-05	AT3G51280	Protein POLLENLESS 3-LIKE 2
BnaA03g35400D	CR	WT	-4.18891	0.00101151	0.00655582	AT3G19710	Methionine aminotransferase BCAT4
BnaC03g55640D	CR	WT	-4.14654	3.02239e-09	6.69732e-08	AT5G59910	Histone H2B.11
BnaC04g45580D	CR	WT	-4.13818	3.45382e-06	4.40078e-05	AT2G37960	Unknown protein
BnaCnng01120D	CR	WT	-4.12877	9.98962e-05	0.000890026	AT4G02060	DNA replication licensing factor MCM7
BnaA09g02160D	CR	WT	-4.12556	5.69997e-06	6.95168e-05	AT3G27830	50S ribosomal protein L12-1%2C chloroplastic
BnaA09g36400D	CR	WT	-4.11677	0.000113969	0.000998766	AT3G57060	binding
BnaCnng74120D	CR	WT	-4.11559	7.97194e-05	0.000732693	AT5G64790	O-Glycosyl hydrolases family 17 protein
BnaC02g29920D	CR	WT	-4.09781	4.94439e-08	9.03113e-07	AT5G42210	Major facilitator superfamily protein
BnaA06g08310D	CR	WT	-4.0435	0.000108485	0.000957491	AT1G12240	BFRUCT4; Invertase; Vacuole; Acid beta-fructofuranosidase 4%2C vacuolar
BnaCnng23100D	CR	WT	-4.03326	1.80629e-05	0.000196714	AT5G42232	Defensin-like protein 115
BnaA04g05180D	CR	WT	-4.02575	1.46331e-07	2.46329e-06	AT3G52840	Beta-galactosidase 2
BnaC05g52000D	CR	WT	-4.00741	1.44531e-08	2.85569e-07	AT3G15550	Unknown protein
BnaCnng09370D	CR	WT	-4.00279	1.89706e-14	7.86983e-13	AT5G55520	Unknown protein
BnaC04g28530D	CR	WT	-3.97803	0.000158195	0.00133022	AT3G51870	Probable envelope ADP%2CATP carrier protein%2C chloroplastic
BnaA04g20360D	CR	WT	-3.9665	1.31325e-05	0.000147819	AT2G34770	FA2H; Fatty Acid 2-hydroxylase; Sphingolipid Biosynthesis 1; FAH1; Fatty acid 2-hydroxylase 1
BnaC07g05950D	CR	WT	-3.96384	0.000174438	0.00145033	AT2G16910	Transcription factor ABORTED MICROSPORES
BnaC04g39400D	CR	WT	-3.95223	2.92714e-12	9.53454e-11	AT2G27970	Cyclin-dependent kinases regulatory subunit 2
BnaAnng10440D	CR	WT	-3.94711	5.28534e-09	1.11678e-07	AT1G10190	Protein of Unknown Function (DUF239)
BnaC04g45710D	CR	WT	-3.941	2.80055e-06	3.64947e-05	AT2G38160	Unknown protein
BnaC06g32310D	CR	WT	-3.93542	0.000475491	0.00343495	AT1G71200	basic helix-loop-helix (bHLH) DNA-binding superfamily protein
BnaC04g45880D	CR	WT	-3.93531	3.1204e-13	1.14664e-11	AT2G38720	microtubule-associated protein 65-5
BnaCnng25400D	CR	WT	-3.93138	9.99683e-16	4.64906e-14	AT5G37010	Unknown protein
BnaA09g52530D	CR	WT	-3.91939	3.03354e-08	5.70335e-07	AT5G66840	SAP domain-containing protein
BnaCnng54620D	CR	WT	-3.91791	5.45213e-15	2.37636e-13	AT2G36870	Probable xyloglucan endotransglucosylase/hydrolase protein 32
BnaC05g12700D	CR	WT	-3.9137	1.48662e-16	7.40059e-15	AT1G16630	Unknown protein
BnaC06g37560D	CR	WT	-3.90837	4.88518e-19	3.00678e-17	AT1G76740	Unknown protein
BnaA07g31540D	CR	WT	-3.89789	5.7921e-06	7.05534e-05	AT1G74430	myb domain protein 95
BnaC02g24220D	CR	WT	-3.89502	0.00411285	0.0211665	AT2G24020	Uncharacterised BCR%2C YbaB family COG0718
BnaC02g12220D	CR	WT	-3.87751	0.00269379	0.0148983	AT5G56460	Probable receptor-like protein kinase At5g56460
BnaC06g01460D	CR	WT	-3.86809	0.000161272	0.00135366	AT1G47900	Filament-like plant protein 6
BnaA06g16510D	CR	WT	-3.86484	0.00028368	0.00219963	AT3G48490	Unknown protein
BnaA03g28030D	CR	WT	-3.86309	2.59973e-23	2.1752e-21	AT3G02590	Putative Delta(7)-sterol-C5(6)-desaturase 2
BnaC05g10420D	CR	WT	-3.86122	0.000370712	0.0027776	AT1G14150	Photosynthetic NDH subunit of lumenal location 2%2C chloroplastic
BnaC04g25130D	CR	WT	-3.86007	1.6468e-12	5.55616e-11	AT3G56100	meristematic receptor-like kinase
BnaA09g37250D	CR	WT	-3.85976	9.14146e-06	0.000106507	AT3G58060	Putative metal tolerance protein C3
BnaA08g11360D	CR	WT	-3.85342	0.00323162	0.017351	AT4G34150	Calcium-dependent lipid-binding (CaLB domain) family protein
BnaC03g44780D	CR	WT	-3.85167	0.000397464	0.00295012	AT3G24715	Protein kinase superfamily protein with octicosapeptide/Phox/Bem1p domain
BnaA01g03580D	CR	WT	-3.83035	0.00298709	0.0162252	AT4G33300	Probable disease resistance protein At4g33300
BnaCnng31040D	CR	WT	-3.83002	1.59397e-07	2.66736e-06	AT3G53420	Aquaporin PIP2-1
BnaA09g35290D	CR	WT	-3.80568	0.000417279	0.00308274	AT3G55700	UDP-glycosyltransferase 76F1
BnaA03g18070D	CR	WT	-3.80199	1.75718e-10	4.5963e-09	AT2G38750	Annexin D4
BnaCnng65470D	CR	WT	-3.79617	0.000525847	0.00373826	AT4G15890	binding
BnaC05g14950D	CR	WT	-3.79593	1.12667e-50	4.37149e-48	AT1G19320	Pathogenesis-related thaumatin superfamily protein
BnaA07g14420D	CR	WT	-3.78647	2.38792e-16	1.16672e-14	AT5G38430	RBCS1B
BnaC03g30600D	CR	WT	-3.78594	1.95064e-12	6.49273e-11	AT4G02800	Unknown protein
BnaA07g15290D	CR	WT	-3.78527	1.15817e-11	3.51771e-10	AT5G41130	Esterase/lipase/thioesterase family protein
BnaC08g34710D	CR	WT	-3.78061	4.15821e-07	6.46622e-06	AT2G22942	growth factors
BnaC04g45920D	CR	WT	-3.77987	7.02391e-06	8.40236e-05	AT2G38760	Annexin D3
BnaA10g23320D	CR	WT	-3.77983	1.54889e-08	3.05122e-07	AT5G08000	PLASMODESMATA CALLOSE-BINDING PROTEIN 2
BnaC01g34620D	CR	WT	-3.77869	0.00511561	0.025269	AT3G17860	Protein TIFY 6B
BnaA02g35810D	CR	WT	-3.77534	7.25462e-06	8.65307e-05	/	/
BnaC06g27340D	CR	WT	-3.76675	1.89258e-05	0.000205489	AT1G65980	Peroxiredoxin-2B
BnaA07g21450D	CR	WT	-3.76034	9.9316e-09	2.00842e-07	AT1G76310	Cyclin-B2-4
BnaA02g31040D	CR	WT	-3.75444	5.24729e-09	1.11042e-07	AT5G28640	GRF1-interacting factor 1
BnaA09g09290D	CR	WT	-3.7437	0.000696281	0.00478403	AT4G35890	La-related protein 1C
BnaC01g29190D	CR	WT	-3.73496	1.01621e-27	1.12971e-25	AT3G59930	Defensin-like protein 206
BnaA03g34110D	CR	WT	-3.72483	6.01123e-08	1.08235e-06	AT3G16240	Aquaporin TIP2-1
BnaCnng32520D	CR	WT	-3.7195	2.80335e-05	0.000292655	AT1G23560	Domain of unknown function (DUF220)
BnaCnng25850D	CR	WT	-3.71807	3.82891e-39	8.9137e-37	AT1G45130	Beta-galactosidase 5
BnaC07g35330D	CR	WT	-3.71312	0.000920677	0.00605704	AT4G18490	Uncharacterized protein At4g18490
BnaC02g14450D	CR	WT	-3.71091	0.000624091	0.00434637	AT5G53250	Arabinogalactan peptide 22
BnaC05g50000D	CR	WT	-3.71091	0.00107924	0.00692478	AT1G17710	Inorganic pyrophosphatase 2
BnaA01g06260D	CR	WT	-3.70935	2.15459e-43	6.31629e-41	AT4G30880	LTP; Lipid Transfer Protein; Fatty Acid Elongation & Wax Biosynthesis
BnaC05g02060D	CR	WT	-3.70827	3.73414e-17	1.97306e-15	AT1G03780	Protein TPX2
BnaC08g25660D	CR	WT	-3.70785	0.000577428	0.00406263	AT3G54870	Armadillo/beta-catenin repeat family protein / kinesin motor family protein
BnaA05g05110D	CR	WT	-3.70301	7.456e-05	0.000690889	AT2G45770	Cell division protein FtsY homolog%2C chloroplastic
BnaA03g47140D	CR	WT	-3.69256	5.07386e-05	0.000491441	AT4G25100	Superoxide dismutase
BnaC05g45740D	CR	WT	-3.68367	0.00011479	0.00100508	AT3G06080	Protein trichome birefringence-like 10
BnaC05g31930D	CR	WT	-3.67991	1.51243e-12	5.14227e-11	AT1G78500	Seco-amyrin synthase
BnaA09g11070D	CR	WT	-3.67752	4.39116e-06	5.47526e-05	AT1G63740	Disease resistance protein (TIR-NBS-LRR class) family
BnaA09g35660D	CR	WT	-3.65886	0.0012727	0.00795996	AT3G56200	Transmembrane amino acid transporter family protein
BnaC07g36890D	CR	WT	-3.65667	1.81622e-14	7.5503e-13	AT4G21760	Beta-glucosidase 47
BnaA04g27740D	CR	WT	-3.65157	2.76784e-05	0.00028933	AT3G54650	F-box/LRR-repeat protein 17
BnaA06g21840D	CR	WT	-3.64929	1.82422e-22	1.42679e-20	AT5G62410	Structural maintenance of chromosomes protein 2-1
BnaC06g12640D	CR	WT	-3.64048	0.000897881	0.00593033	/	/
BnaA05g33960D	CR	WT	-3.63113	2.36935e-09	5.33084e-08	AT3G01330	E2F transcription factor-like E2FF
BnaC02g28120D	CR	WT	-3.62258	0.000992103	0.00645261	AT4G02290	Endoglucanase 17
BnaAnng29550D	CR	WT	-3.61273	0.00161695	0.00976986	AT1G13080	Cytochrome P450 71B2
BnaC08g32510D	CR	WT	-3.60672	1.56702e-17	8.58953e-16	AT3G62820	Plant invertase/pectin methylesterase inhibitor superfamily protein
BnaA08g18210D	CR	WT	-3.59997	0.000152649	0.00129169	AT1G28670	GDSL esterase/lipase At1g28670
BnaC03g77080D	CR	WT	-3.59674	6.92209e-06	8.30903e-05	AT4G34150	Calcium-dependent lipid-binding (CaLB domain) family protein
BnaA07g15110D	CR	WT	-3.59147	1.82862e-06	2.47163e-05	AT5G40700	Unknown protein
BnaC06g06840D	CR	WT	-3.5889	6.68136e-05	0.000625998	AT1G54040	Epithiospecifier protein
BnaA09g37090D	CR	WT	-3.57971	3.76061e-09	8.1885e-08	AT3G57860	Protein GIGAS CELL1
BnaCnng18640D	CR	WT	-3.57611	3.82789e-27	4.16188e-25	AT4G20050	Polygalacturonase QRT3
BnaC09g39110D	CR	WT	-3.5757	0.0069262	0.0322446	AT5G18700	Protein kinase family protein with ARM repeat domain
BnaA09g55700D	CR	WT	-3.57351	0.000233384	0.00186031	AT3G63210	Protein of unknown function (DUF581)
BnaA07g34720D	CR	WT	-3.56814	0.000417512	0.00308388	AT1G79210	Proteasome subunit alpha type-2-B
BnaC02g28670D	CR	WT	-3.54999	7.02532e-06	8.40236e-05	AT5G42700	B3 domain-containing protein At5g42700
BnaA09g30050D	CR	WT	-3.53897	3.18333e-19	1.99026e-17	AT1G23200	Probable pectinesterase/pectinesterase inhibitor 6
BnaC08g08340D	CR	WT	-3.53211	0.000567752	0.00400024	AT4G14080	Probable glucan endo-1%2C3-beta-glucosidase A6
BnaC04g56560D	CR	WT	-3.52978	7.85132e-16	3.6903e-14	AT2G38310	Abscisic acid receptor PYL4
BnaA01g28640D	CR	WT	-3.52275	7.01372e-21	4.85271e-19	AT3G15550	Unknown protein
BnaC07g20260D	CR	WT	-3.52035	6.83544e-06	8.21748e-05	AT5G47500	Probable pectinesterase 68
BnaC05g43450D	CR	WT	-3.51853	3.57444e-05	0.000361056	AT3G09430	Unknown protein
BnaA09g40690D	CR	WT	-3.51288	6.3146e-05	0.000596436	AT2G26040	Abscisic acid receptor PYL2
BnaA03g35920D	CR	WT	-3.50261	0.0022108	0.0126822	AT3G20750	GATA transcription factor 29
BnaA03g23910D	CR	WT	-3.49734	3.32837e-10	8.38471e-09	AT4G09060	Unknown protein
BnaC03g26280D	CR	WT	-3.49732	1.5546e-05	0.000171809	AT2G29680	Cell division control protein 6 homolog
BnaA01g04810D	CR	WT	-3.49619	5.49297e-21	3.82728e-19	AT4G32100	Beta-1%2C3-N-Acetylglucosaminyltransferase family protein
BnaA10g07530D	CR	WT	-3.48928	8.30817e-05	0.000758723	AT5G52220	Unknown protein
BnaA09g50660D	CR	WT	-3.48295	5.20136e-12	1.64548e-10	AT1G04150	C2 calcium/lipid-binding plant phosphoribosyltransferase family protein
BnaC07g49810D	CR	WT	-3.47857	1.0505e-38	2.33566e-36	AT5G60930	P-loop containing nucleoside triphosphate hydrolases superfamily protein
BnaC02g19170D	CR	WT	-3.47826	9.84365e-06	0.000113764	AT1G69400	Mitotic checkpoint protein BUB3.3
BnaA10g20120D	CR	WT	-3.47794	9.31535e-12	2.85786e-10	AT5G13170	Bidirectional sugar transporter SWEET15
BnaA04g05910D	CR	WT	-3.47572	1.69648e-05	0.000185881	AT3G51870	Probable envelope ADP%2CATP carrier protein%2C chloroplastic
BnaA09g10710D	CR	WT	-3.47537	3.07309e-20	2.04062e-18	AT1G12520	Copper chaperone for superoxide dismutase%2C chloroplastic/cytosolic
BnaA09g33130D	CR	WT	-3.47201	2.97766e-09	6.60929e-08	AT3G52720	Alpha carbonic anhydrase 1%2C chloroplastic
BnaA09g20750D	CR	WT	-3.47009	6.64513e-12	2.0724e-10	AT4G12620	Origin of replication complex subunit 1B
BnaC05g48970D	CR	WT	-3.46877	0.000107507	0.000949709	AT1G04680	Probable pectate lyase 1
BnaA04g21400D	CR	WT	-3.46398	5.77788e-12	1.81914e-10	AT2G37420	ATP binding microtubule motor family protein
BnaA10g03600D	CR	WT	-3.45936	3.83866e-08	7.0966e-07	AT1G05440	C-8 sterol isomerases
BnaC03g25340D	CR	WT	-3.45789	0.000205359	0.0016644	AT1G10270	Pentatricopeptide repeat-containing protein At1g10270
BnaAnng19400D	CR	WT	-3.44429	0.000389603	0.00289775	AT2G43870	Pectin lyase-like superfamily protein
BnaAnng22540D	CR	WT	-3.43565	0.00228048	0.0130121	AT1G18730	Photosynthetic NDH subunit of subcomplex B 4%2C chloroplastic
BnaA08g02350D	CR	WT	-3.43431	1.05225e-09	2.4788e-08	AT1G49870	Unknown protein
BnaA05g23390D	CR	WT	-3.43267	0.000755424	0.00512895	AT3G16320	Cell division cycle protein 27 homolog A
BnaA04g29480D	CR	WT	-3.43184	0.00334613	0.0178641	AT2G47930	Classical arabinogalactan protein 26
BnaC03g76850D	CR	WT	-3.42726	1.5888e-12	5.37883e-11	AT4G36010	Pathogenesis-related thaumatin superfamily protein
BnaC07g30830D	CR	WT	-3.42058	1.48598e-25	1.43437e-23	AT5G23400	Leucine-rich repeat (LRR) family protein
BnaC02g17330D	CR	WT	-3.41556	1.18936e-10	3.17828e-09	AT1G67270	Zinc-finger domain of monoamine-oxidase A repressor R1 protein
BnaC04g21760D	CR	WT	-3.41265	0.0039319	0.020381	AT3G61460	brassinosteroid-responsive RING-H2
BnaA10g02140D	CR	WT	-3.39913	5.19063e-14	2.06457e-12	AT1G03780	Protein TPX2
BnaA02g30320D	CR	WT	-3.39499	1.48598e-12	5.06102e-11	AT5G13930	Chalcone synthase
BnaA05g18930D	CR	WT	-3.39497	3.89154e-73	3.94901e-70	AT3G20130	cytochrome P450%2C family 705%2C subfamily A%2C polypeptide 22
BnaC04g02270D	CR	WT	-3.38774	6.89385e-07	1.02299e-05	AT2G41870	Remorin family protein
BnaC03g02420D	CR	WT	-3.38108	6.50675e-18	3.67873e-16	AT5G06150	Cyclin-B1-2
BnaC09g18300D	CR	WT	-3.38018	1.66631e-12	5.61241e-11	AT5G44720	Molybdenum cofactor sulfurase family protein
BnaC02g36400D	CR	WT	-3.37823	0.00319645	0.0171879	AT3G26840	esterases/lipases/thioesterase; Fatty Acid Elongation & Wax Biosynthesis; Acyltransferase-like protein At3g26840%2C chloroplastic
BnaA02g27150D	CR	WT	-3.37549	0.00265752	0.0147571	AT2G01120	origin recognition complex subunit 4
BnaA06g11160D	CR	WT	-3.3744	8.07098e-14	3.1563e-12	AT1G16630	Unknown protein
BnaA08g11510D	CR	WT	-3.3725	0.0319963	0.105885	AT4G33610	glycine-rich protein
BnaCnng65750D	CR	WT	-3.37143	0.000235043	0.00187126	AT1G11210	Protein of unknown function (DUF761)
BnaA06g00380D	CR	WT	-3.36184	3.26692e-26	3.33226e-24	AT1G55330	Arabinogalactan peptide 21
BnaA06g28660D	CR	WT	-3.36036	4.47489e-05	0.00043945	AT5G27610	Protein ALWAYS EARLY 1
BnaA06g22050D	CR	WT	-3.35929	1.45826e-35	2.62327e-33	AT5G62550	Unknown protein
BnaC05g40180D	CR	WT	-3.3387	4.62557e-10	1.13986e-08	AT4G27820	Beta-glucosidase 9
BnaC03g32350D	CR	WT	-3.33409	8.62743e-09	1.75367e-07	AT3G01710	TPX2 (targeting protein for Xklp2) protein family
BnaA05g25550D	CR	WT	-3.33043	9.71904e-07	1.39312e-05	AT3G13870	Protein ROOT HAIR DEFECTIVE 3
BnaA08g14900D	CR	WT	-3.33002	5.08281e-05	0.000492188	AT4G35720	Arabidopsis protein of unknown function (DUF241)
BnaC01g32200D	CR	WT	-3.32978	0.00199495	0.0116586	AT3G21180	Calcium-transporting ATPase 9%2C plasma membrane-type
BnaC08g39870D	CR	WT	-3.32884	0.000630372	0.00438446	AT1G14130	2-oxoglutarate (2OG) and Fe(II)-dependent oxygenase superfamily protein
BnaA02g09000D	CR	WT	-3.3264	0.000542796	0.00384701	AT5G55520	Unknown protein
BnaA06g28420D	CR	WT	-3.32265	2.18753e-08	4.20279e-07	AT5G27000	Kinesin-4
BnaA08g01410D	CR	WT	-3.32135	0.00203362	0.0118477	AT1G52910	Protein of unknown function (DUF1218)
BnaCnng10730D	CR	WT	-3.32024	1.00625e-20	6.90177e-19	AT3G20670	Probable histone H2A.2
BnaA04g15340D	CR	WT	-3.31891	7.50127e-12	2.32475e-10	AT2G26180	IQ-domain 6
BnaC01g42430D	CR	WT	-3.31512	4.53462e-07	6.9993e-06	AT3G51230	Unknown protein
BnaA01g25310D	CR	WT	-3.31181	4.60539e-09	9.86303e-08	AT3G21180	Calcium-transporting ATPase 9%2C plasma membrane-type
BnaA10g09600D	CR	WT	-3.30814	1.93387e-12	6.44233e-11	AT1G34355	FHA domain-containing protein PS1
BnaA05g22780D	CR	WT	-3.30598	8.08867e-05	0.000741183	AT3G17360	Phragmoplast orienting kinesin-1
BnaC04g30030D	CR	WT	-3.29972	3.19412e-11	9.1403e-10	AT5G36800	Unknown protein
BnaA03g01900D	CR	WT	-3.29108	1.16228e-20	7.91601e-19	AT5G06150	Cyclin-B1-2
BnaA09g22120D	CR	WT	-3.28867	2.42168e-07	3.9408e-06	AT4G11080	High mobility group B protein 13
BnaC07g29590D	CR	WT	-3.28753	4.65014e-13	1.66849e-11	AT5G25090	Early nodulin-like protein 3
BnaCnng09670D	CR	WT	-3.28413	4.6435e-17	2.41804e-15	AT1G77240	Probable acyl-activating enzyme 4
BnaCnng30570D	CR	WT	-3.28395	0.000851603	0.00566057	AT2G19070	Spermidine hydroxycinnamoyl transferase
BnaC07g27970D	CR	WT	-3.28337	0.00593214	0.0285054	AT5G61440	Thioredoxin-like 1-2%2C chloroplastic
BnaC03g42480D	CR	WT	-3.27892	7.26772e-08	1.28923e-06	AT3G29040	Putative cysteine-rich repeat secretory protein 13
BnaA03g10000D	CR	WT	-3.2758	9.10366e-12	2.79725e-10	AT5G57920	early nodulin-like protein 10
BnaC04g38290D	CR	WT	-3.27506	0.0110268	0.0467783	AT2G26180	IQ-domain 6
BnaC02g14540D	CR	WT	-3.26881	9.78128e-05	0.000874613	AT5G53160	Abscisic acid receptor PYL8
BnaA04g05100D	CR	WT	-3.26489	0.000120574	0.00104806	AT3G52960	Peroxiredoxin-2E%2C chloroplastic
BnaA07g30980D	CR	WT	-3.2576	2.21241e-09	4.99762e-08	AT1G73620	Pathogenesis-related thaumatin superfamily protein
BnaC09g35460D	CR	WT	-3.25754	3.40879e-05	0.000346091	AT5G60150	Unknown protein
BnaC07g32170D	CR	WT	-3.25706	0.0252381	0.0886503	AT3G51280	Protein POLLENLESS 3-LIKE 2
BnaA09g22380D	CR	WT	-3.2564	0.00468978	0.0235814	AT4G10730	Protein kinase superfamily protein
BnaC01g08820D	CR	WT	-3.24908	0.000156962	0.00132197	AT4G29700	Alkaline-phosphatase-like family protein
BnaA09g12920D	CR	WT	-3.24828	1.75097e-24	1.56073e-22	AT1G63100	Scarecrow-like protein 28
BnaC03g13170D	CR	WT	-3.24779	0.000126245	0.0010916	AT5G57030	Lycopene epsilon cyclase%2C chloroplastic
BnaC06g34730D	CR	WT	-3.24487	0.00532769	0.0261291	AT1G73890	LTP; Lipid Transfer Protein; Fatty Acid Elongation & Wax Biosynthesis
BnaA08g14830D	CR	WT	-3.24125	7.21646e-06	8.61534e-05	AT4G36010	Pathogenesis-related thaumatin superfamily protein
BnaCnng52280D	CR	WT	-3.23917	4.12123e-13	1.49087e-11	AT1G47210	Cyclin-A3-2
BnaA03g51730D	CR	WT	-3.23876	3.5119e-14	1.41535e-12	AT4G31840	early nodulin-like protein 15
BnaA04g07110D	CR	WT	-3.23722	0.00412235	0.0212071	AT1G48920	Nucleolin 1
BnaA10g04630D	CR	WT	-3.23622	1.53217e-20	1.03476e-18	AT1G07175	Unknown protein
BnaC08g23920D	CR	WT	-3.23491	4.17383e-06	5.23064e-05	AT3G52720	Alpha carbonic anhydrase 1%2C chloroplastic
BnaA02g24390D	CR	WT	-3.23339	1.65674e-15	7.59759e-14	AT5G46280	DNA replication licensing factor MCM3
BnaA05g35190D	CR	WT	-3.23116	1.10623e-08	2.21785e-07	AT2G32590	Condensin complex subunit 2
BnaA10g14730D	CR	WT	-3.23071	2.23918e-10	5.75814e-09	AT5G20810	SAUR-like auxin-responsive protein family
BnaC06g19120D	CR	WT	-3.23005	0.0455405	0.138024	AT5G25820	Exostosin family protein
BnaA03g17500D	CR	WT	-3.22853	0.000893416	0.00590281	AT2G37940	IPCS; Inositolphosphorylceramide Synthase; Sphingolipid Biosynthesis 2; ERH1; Phosphatidylinositol:ceramide inositolphosphotransferase 2
BnaA03g09200D	CR	WT	-3.22666	6.818e-16	3.21608e-14	AT5G59870	Probable histone H2A.7
BnaCnng08660D	CR	WT	-3.22629	1.18178e-10	3.16014e-09	AT1G01370	Histone H3-like centromeric protein HTR12
BnaC08g42900D	CR	WT	-3.22533	0.000606416	0.0042417	AT1G08930	Sugar transporter ERD6
BnaC04g44160D	CR	WT	-3.22294	1.05276e-06	1.49548e-05	AT2G33790	Non-classical arabinogalactan protein 30
BnaC02g07020D	CR	WT	-3.22088	4.56933e-12	1.45483e-10	AT5G17160	Unknown protein
BnaC04g03410D	CR	WT	-3.21948	5.36966e-07	8.16403e-06	AT2G44190	Protein ENDOSPERM DEFECTIVE 1
BnaC07g43510D	CR	WT	-3.214	3.03754e-28	3.5357e-26	AT4G31840	early nodulin-like protein 15
BnaA05g08100D	CR	WT	-3.20375	4.61781e-09	9.88395e-08	AT2G36200	Probable 125 kDa kinesin-related protein
BnaAnng03790D	CR	WT	-3.198	0.000579173	0.00407346	AT3G50120	Plant protein of unknown function (DUF247)
BnaC07g32420D	CR	WT	-3.19734	0.00281535	0.0154322	AT3G51670	Patellin-6
BnaA08g12330D	CR	WT	-3.19525	5.67711e-16	2.69075e-14	AT4G31840	early nodulin-like protein 15
BnaA09g01390D	CR	WT	-3.19181	1.08005e-34	1.82667e-32	AT4G03210	Xyloglucan endotransglucosylase/hydrolase protein 9
BnaC01g09540D	CR	WT	-3.18859	1.24107e-09	2.88581e-08	AT3G23890	DNA topoisomerase 2
BnaA01g18540D	CR	WT	-3.18723	8.66052e-34	1.39329e-31	AT4G15480	UDP-glycosyltransferase 84A1
BnaC09g17820D	CR	WT	-3.18541	2.53642e-36	4.84934e-34	AT5G44020	HAD superfamily%2C subfamily IIIB acid phosphatase
BnaC07g32800D	CR	WT	-3.18237	0.0038673	0.0200812	AT3G52270	Transcription initiation factor IIF%2C beta subunit
BnaCnng58480D	CR	WT	-3.17854	0.00263011	0.0146275	AT3G17900	Unknown protein
BnaA02g01400D	CR	WT	-3.17848	1.47346e-06	2.029e-05	AT5G13060	ARMADILLO BTB ARABIDOPSIS PROTEIN 1
BnaC03g09230D	CR	WT	-3.17804	0.000416094	0.00307456	AT5G18700	Protein kinase family protein with ARM repeat domain
BnaC03g64080D	CR	WT	-3.17623	5.28888e-05	0.000510394	AT4G21590	Endonuclease 3
BnaC07g12800D	CR	WT	-3.17468	2.36274e-24	2.07334e-22	AT1G27130	Glutathione S-transferase U13
BnaC03g39740D	CR	WT	-3.17282	0.0100567	0.043574	AT3G16720	RING-H2 finger protein ATL2
BnaA07g23740D	CR	WT	-3.16708	3.916e-08	7.2316e-07	AT1G70710	Endoglucanase 8
BnaC07g18830D	CR	WT	-3.15593	0.0023723	0.0134315	AT5G46090	Protein of unknown function (DUF679)
BnaA01g28810D	CR	WT	-3.15543	0.000108895	0.000959635	AT3G16530	Lectin-like protein At3g16530
BnaA08g12860D	CR	WT	-3.14147	3.92351e-05	0.000390928	AT4G30860	Histone-lysine N-methyltransferase ASHR3
BnaC03g48670D	CR	WT	-3.13451	9.22364e-05	0.000830757	AT5G67620	Unknown protein
BnaC05g49770D	CR	WT	-3.13324	4.35774e-14	1.74204e-12	AT1G15660	centromere protein C
BnaA09g06650D	CR	WT	-3.13308	0.00107604	0.00690986	AT5G63540	RecQ-mediated genome instability protein 1
BnaC09g08170D	CR	WT	-3.13045	1.70247e-18	9.92295e-17	AT5G66230	Chalcone-flavanone isomerase family protein
BnaC03g73620D	CR	WT	-3.12635	1.57128e-12	5.32406e-11	AT3G13080	ABC transporter C family member 3
BnaC08g46630D	CR	WT	-3.12584	1.63024e-16	8.09518e-15	AT1G44900	DNA replication licensing factor MCM2
BnaA05g12330D	CR	WT	-3.12189	0.00340028	0.0180776	AT2G05050	Protein phosphatase 2C family protein
BnaA01g30060D	CR	WT	-3.11851	0.000778528	0.00525965	AT3G13080	ABC transporter C family member 3
BnaA08g09860D	CR	WT	-3.11579	5.16594e-10	1.26593e-08	AT4G21070	Protein BREAST CANCER SUSCEPTIBILITY 1 homolog
BnaA03g45150D	CR	WT	-3.11409	0.00174004	0.0103851	AT4G22105	Putative defensin-like protein 235
BnaAnng25020D	CR	WT	-3.11257	1.10827e-16	5.58025e-15	AT2G34190	Nucleobase-ascorbate transporter 2
BnaA05g02640D	CR	WT	-3.11157	1.89506e-08	3.67281e-07	AT2G42110	Unknown protein
BnaAnng13920D	CR	WT	-3.1102	0.000134455	0.00115477	AT5G01320	Pyruvate decarboxylase 4
BnaC09g05560D	CR	WT	-3.10945	8.03684e-14	3.14605e-12	AT5G62260	AT-hook motif nuclear-localized protein 6
BnaA10g12980D	CR	WT	-3.10701	7.42244e-06	8.83195e-05	AT5G60150	Unknown protein
BnaA06g03930D	CR	WT	-3.10108	8.68813e-19	5.21763e-17	AT1G48260	CBL-interacting serine/threonine-protein kinase 17
BnaA07g33960D	CR	WT	-3.10015	2.97525e-11	8.5387e-10	AT1G78090	Trehalose-phosphate phosphatase B
BnaC09g41570D	CR	WT	-3.0998	8.19915e-55	4.2696e-52	AT5G16250	Unknown protein
BnaAnng06680D	CR	WT	-3.08993	9.23433e-10	2.19231e-08	AT5G60930	P-loop containing nucleoside triphosphate hydrolases superfamily protein
BnaC01g01820D	CR	WT	-3.08019	1.00187e-35	1.83565e-33	AT4G37050	PAH; Acyl-Hydrolase (Patatin-like); Oxylipin Metabolism 1; Patatin-like protein 3
BnaA06g27460D	CR	WT	-3.07983	1.61103e-13	6.12468e-12	AT5G25090	Early nodulin-like protein 3
BnaCnng38040D	CR	WT	-3.07763	3.53526e-20	2.32411e-18	AT3G23740	Unknown protein
BnaA03g38180D	CR	WT	-3.077	1.96559e-06	2.64234e-05	AT2G06850	Xyloglucan endotransglucosylase/hydrolase protein 4
BnaC07g28000D	CR	WT	-3.07571	0.0050622	0.0250615	AT3G50620	P-loop containing nucleoside triphosphate hydrolases superfamily protein
BnaC05g49410D	CR	WT	-3.07276	4.86695e-76	5.66513e-73	AT1G12080	Vacuolar calcium-binding protein-related
BnaC02g12980D	CR	WT	-3.07207	7.05599e-16	3.32043e-14	AT5G55520	Unknown protein
BnaC09g31940D	CR	WT	-3.07199	3.0321e-13	1.1173e-11	AT1G34355	FHA domain-containing protein PS1
BnaC01g01420D	CR	WT	-3.06906	4.3012e-15	1.90621e-13	AT4G37490	Cyclin-B1-1
BnaA07g34330D	CR	WT	-3.06607	3.45054e-05	0.000349612	AT1G78700	BES1/BZR1 homolog protein 4
BnaA02g22910D	CR	WT	-3.06313	6.1624e-05	0.000584152	AT5G42210	Major facilitator superfamily protein
BnaC03g74950D	CR	WT	-3.06159	7.97436e-26	7.85058e-24	AT5G62410	Structural maintenance of chromosomes protein 2-1
BnaA01g25600D	CR	WT	-3.05999	4.27585e-44	1.31179e-41	AT3G20670	Probable histone H2A.2
BnaA01g26180D	CR	WT	-3.05806	0.00231429	0.0131709	AT3G19380	U-box domain-containing protein 25
BnaA10g29500D	CR	WT	-3.05631	1.84655e-08	3.58935e-07	AT5G58690	PIPLC; Phosphoinositide-specific Phospholipase C; Phospholipid Signaling; Phosphoinositide phospholipase C 5
BnaA03g36370D	CR	WT	-3.05182	0.00263225	0.0146353	AT3G21620	CSC1-like protein At3g21620
BnaA09g13290D	CR	WT	-3.04928	0.000282462	0.00219274	AT1G62400	Protein kinase superfamily protein
BnaC09g00460D	CR	WT	-3.04814	5.29078e-06	6.4845e-05	AT4G03100	Rho GTPase-activating protein 2
BnaA03g00120D	CR	WT	-3.04778	0.000452956	0.00329465	AT5G01910	Unknown protein
BnaA08g04370D	CR	WT	-3.0473	1.16412e-20	7.91601e-19	AT1G44900	DNA replication licensing factor MCM2
BnaA02g30070D	CR	WT	-3.04402	2.90289e-31	4.17763e-29	AT5G10390	Histone H3.2
BnaA03g36800D	CR	WT	-3.04254	0.0022641	0.012937	AT3G22830	Heat stress transcription factor A-6b
BnaC06g39100D	CR	WT	-3.03853	5.55097e-23	4.47424e-21	AT1G78700	BES1/BZR1 homolog protein 4
BnaA06g32290D	CR	WT	-3.03815	0.00104968	0.00675922	AT3G27250	Unknown protein
BnaC01g40520D	CR	WT	-3.03214	2.99542e-23	2.49572e-21	AT3G03760	LOB domain-containing protein 20
BnaC07g30480D	CR	WT	-3.0178	2.02674e-12	6.72905e-11	AT5G23910	ATP binding microtubule motor family protein
BnaA08g28700D	CR	WT	-3.01657	1.76355e-08	3.43645e-07	AT1G06660	Protein JASON
BnaA01g07960D	CR	WT	-3.01645	3.13624e-05	0.000322055	AT3G23890	DNA topoisomerase 2
BnaA06g25730D	CR	WT	-3.0139	3.99024e-09	8.64355e-08	AT2G17620	Cyclin-B2-1
BnaA10g06640D	CR	WT	-3.00953	1.06264e-17	5.93999e-16	AT5G53250	Arabinogalactan peptide 22
BnaA03g02520D	CR	WT	-3.00874	9.43627e-10	2.23757e-08	AT5G08540	Unknown protein
BnaA08g26540D	CR	WT	-3.00862	9.35966e-40	2.23143e-37	AT1G09200	Histone H3.2
BnaA04g21840D	CR	WT	-3.00682	0.000206943	0.00167587	AT2G38160	Unknown protein
BnaC03g74740D	CR	WT	-3.0051	2.11484e-05	0.0002275	AT5G62550	Unknown protein
BnaC05g17950D	CR	WT	-3.00109	2.30087e-05	0.000245311	AT1G22690	Gibberellin-regulated protein 9
BnaC08g45280D	CR	WT	-2.99686	8.94645e-21	6.14696e-19	AT1G07370	Proliferating cellular nuclear antigen 1
BnaC07g42530D	CR	WT	-2.99425	2.72669e-11	7.83672e-10	AT4G30280	Probable xyloglucan endotransglucosylase/hydrolase protein 18
BnaA10g14380D	CR	WT	-2.99242	0.00385009	0.0200172	AT5G21430	NAD(P)H-quinone oxidoreductase subunit U%2C chloroplastic
BnaC05g01400D	CR	WT	-2.99001	2.42997e-24	2.12763e-22	AT1G02730	Cellulose synthase-like protein D5
BnaC03g11030D	CR	WT	-2.98714	9.80881e-30	1.28117e-27	AT5G22880	Histone H2B.10
BnaC05g28510D	CR	WT	-2.98615	4.98491e-13	1.78053e-11	AT1G32540	Protein LOL1
BnaAnng23850D	CR	WT	-2.9854	4.58413e-08	8.40304e-07	AT4G35620	Cyclin-B2-2
BnaC08g33620D	CR	WT	-2.98014	3.79704e-30	5.12872e-28	AT2G25060	Early nodulin-like protein 1
BnaA08g05640D	CR	WT	-2.97874	6.56245e-08	1.17359e-06	AT4G15140	Unknown protein
BnaA01g21670D	CR	WT	-2.97677	1.9803e-08	3.83238e-07	AT1G58225	Unknown protein
BnaC02g43450D	CR	WT	-2.97641	4.15458e-06	5.20816e-05	AT5G65020	Annexin D2
BnaC09g10980D	CR	WT	-2.97358	1.82727e-19	1.16077e-17	AT1G12520	Copper chaperone for superoxide dismutase%2C chloroplastic/cytosolic
BnaA07g24970D	CR	WT	-2.96963	5.25243e-08	9.56604e-07	AT1G57820	E3 ubiquitin-protein ligase ORTHRUS 2
BnaC08g41570D	CR	WT	-2.96905	3.01379e-12	9.78455e-11	AT1G12070	Immunoglobulin E-set superfamily protein
BnaC02g38490D	CR	WT	-2.96621	3.47674e-36	6.58352e-34	AT5G10390	Histone H3.2
BnaC09g17810D	CR	WT	-2.96597	0.000347688	0.00262601	AT5G44010	Unknown protein
BnaC05g32170D	CR	WT	-2.96101	1.28647e-23	1.08326e-21	AT3G20670	Probable histone H2A.2
BnaA03g54890D	CR	WT	-2.95962	0.000618314	0.00431121	AT5G02370	ATP binding microtubule motor family protein
BnaC06g13140D	CR	WT	-2.95873	0.0223928	0.0811555	AT5G40700	Unknown protein
BnaCnng32530D	CR	WT	-2.95423	0.00124204	0.00780485	AT1G23580	Domain of unknown function DUF220
BnaA06g33410D	CR	WT	-2.95392	0.00789104	0.0359043	AT3G25770	AOX; Allene Oxide Cyclase; Oxylipin Metabolism 1
BnaC09g21860D	CR	WT	-2.95284	6.74431e-25	6.20728e-23	AT4G05190	Kinesin-5
BnaA08g10490D	CR	WT	-2.95081	2.17761e-07	3.5671e-06	AT4G22860	Cell cycle regulated microtubule associated protein
BnaA05g10020D	CR	WT	-2.94987	6.44817e-09	1.34241e-07	AT2G33560	Mitotic spindle checkpoint protein BUBR1
BnaA09g00540D	CR	WT	-2.94917	4.14278e-35	7.12847e-33	AT4G02060	DNA replication licensing factor MCM7
BnaC06g01800D	CR	WT	-2.94735	1.91937e-05	0.000207999	AT1G22690	Gibberellin-regulated protein 9
BnaCnng05430D	CR	WT	-2.94573	1.92002e-11	5.64956e-10	AT2G33560	Mitotic spindle checkpoint protein BUBR1
BnaC07g11800D	CR	WT	-2.94449	2.2264e-08	4.26692e-07	AT1G27880	ATP-dependent DNA helicase Q-like 5
BnaC04g30270D	CR	WT	-2.94426	2.93771e-08	5.53897e-07	AT5G37630	ARM repeat superfamily protein
BnaCnng55860D	CR	WT	-2.94212	0.014315	0.0573548	AT5G38430	RBCS1B
BnaCnng77960D	CR	WT	-2.94089	8.93688e-25	8.16826e-23	AT1G71120	GDSL esterase/lipase 6
BnaC07g20440D	CR	WT	-2.93674	1.66188e-06	2.26638e-05	AT1G01690	putative recombination initiation defects 3
BnaC07g15060D	CR	WT	-2.93335	6.0326e-26	6.01376e-24	AT1G20930	Cyclin-dependent kinase B2-2
BnaCnng30750D	CR	WT	-2.93257	0.000764315	0.00517777	AT2G31400	Pentatricopeptide repeat-containing protein At2g31400%2C chloroplastic
BnaA06g36910D	CR	WT	-2.92497	0.00364913	0.0191536	AT5G43080	Putative cyclin-A3-1
BnaA05g29710D	CR	WT	-2.92188	1.37051e-08	2.7174e-07	AT3G08030	Protein of unknown function%2C DUF642
BnaC07g16550D	CR	WT	-2.92086	2.64426e-15	1.18785e-13	AT5G66750	ATP-dependent DNA helicase DDM1
BnaA07g10590D	CR	WT	-2.91927	0.00539079	0.0263618	AT1G22250	Unknown protein
BnaA10g22060D	CR	WT	-2.91623	3.8197e-11	1.08442e-09	/	/
BnaC06g22370D	CR	WT	-2.90265	3.28544e-06	4.20248e-05	AT1G75500	Protein WALLS ARE THIN 1
BnaA06g04950D	CR	WT	-2.90242	3.75218e-36	7.07125e-34	AT1G08560	Syntaxin-related protein KNOLLE
BnaAnng19050D	CR	WT	-2.90168	3.40364e-11	9.69781e-10	AT3G23740	Unknown protein
BnaA08g13780D	CR	WT	-2.89136	3.92668e-13	1.4231e-11	AT4G28310	Unknown protein
BnaC03g08250D	CR	WT	-2.88787	8.33341e-09	1.69914e-07	AT5G17160	Unknown protein
BnaC02g04480D	CR	WT	-2.8865	6.06837e-11	1.67418e-09	AT5G13060	ARMADILLO BTB ARABIDOPSIS PROTEIN 1
BnaC06g40840D	CR	WT	-2.88395	0.00134635	0.00834898	AT1G48630	Receptor for activated C kinase 1B
BnaC04g03750D	CR	WT	-2.88281	0.0005856	0.00411281	AT2G44450	Beta-glucosidase 15
BnaCnng09570D	CR	WT	-2.88032	1.14105e-05	0.000130365	AT3G48490	Unknown protein
BnaC09g36190D	CR	WT	-2.8803	3.65051e-42	9.82806e-40	AT5G22880	Histone H2B.10
BnaC05g39340D	CR	WT	-2.87543	0.000165627	0.00138669	AT1G53830	Pectinesterase 2
BnaC01g10190D	CR	WT	-2.87492	5.44761e-10	1.33248e-08	AT2G07170	ARM repeat superfamily protein
BnaA06g35360D	CR	WT	-2.87432	0.000441184	0.00322682	AT5G47650	Nudix hydrolase 2
BnaA02g04790D	CR	WT	-2.86847	7.35759e-07	1.08287e-05	AT5G20270	Heptahelical transmembrane protein 1
BnaA06g07080D	CR	WT	-2.86565	3.23141e-08	6.04949e-07	AT1G80740	Putative DNA (cytosine-5)-methyltransferase CMT1
BnaC09g02940D	CR	WT	-2.86449	4.52638e-05	0.000443296	AT5G28020	Bifunctional L-3-cyanoalanine synthase/cysteine synthase D2
BnaA01g22790D	CR	WT	-2.86381	0.00776836	0.035448	AT1G61630	Equilibrative nucleotide transporter 7
BnaC01g20780D	CR	WT	-2.86306	2.29074e-25	2.19082e-23	AT4G28250	Expansin-B3
BnaA01g36110D	CR	WT	-2.86293	2.49876e-06	3.29307e-05	AT1G60986	Defensin-like protein 245
BnaC08g09460D	CR	WT	-2.86167	0.000205697	0.00166646	AT5G28820	Unknown protein
BnaA08g27690D	CR	WT	-2.85945	0.00287103	0.0156895	AT1G04040	HAD superfamily%2C subfamily IIIB acid phosphatase
BnaA07g32610D	CR	WT	-2.85868	4.8049e-15	2.11758e-13	AT1G76310	Cyclin-B2-4
BnaC07g34020D	CR	WT	-2.85766	0.000343595	0.00260102	AT4G17030	Expansin-like B1
BnaC02g06090D	CR	WT	-2.85665	6.08565e-12	1.91147e-10	AT5G15510	TPX2 (targeting protein for Xklp2) protein family
BnaCnng34680D	CR	WT	-2.85659	1.09324e-07	1.88359e-06	AT5G45700	Haloacid dehalogenase-like hydrolase (HAD) superfamily protein
BnaC08g10120D	CR	WT	-2.85102	1.02182e-06	1.45623e-05	AT4G15140	Unknown protein
BnaC06g37610D	CR	WT	-2.84931	1.52719e-05	0.000169016	AT1G76790	O-methyltransferase family protein
BnaC08g26610D	CR	WT	-2.84738	4.35852e-11	1.22946e-09	AT3G55660	Rop guanine nucleotide exchange factor 6
BnaA01g00690D	CR	WT	-2.84686	8.52641e-06	0.000100131	AT4G36880	cysteine proteinase1
BnaC02g43000D	CR	WT	-2.8446	2.08134e-19	1.31794e-17	AT5G64310	Classical arabinogalactan protein 1
BnaC09g52200D	CR	WT	-2.84159	6.10006e-54	2.98044e-51	AT2G01520	MLP-like protein 328
BnaC08g12000D	CR	WT	-2.83984	4.40858e-06	5.49524e-05	AT4G25300	2-oxoglutarate (2OG) and Fe(II)-dependent oxygenase superfamily protein
BnaC08g45490D	CR	WT	-2.83551	1.79965e-07	2.97754e-06	AT1G03780	Protein TPX2
BnaA05g36870D	CR	WT	-2.82362	0.0047758	0.0239278	/	/
BnaC03g74160D	CR	WT	-2.82279	0.000715254	0.00489146	/	/
BnaC03g71660D	CR	WT	-2.82276	5.92335e-08	1.06798e-06	AT5G54970	Unknown protein
BnaA08g10840D	CR	WT	-2.81842	0.0043116	0.0219807	AT4G35150	O-methyltransferase family protein
BnaCnng71820D	CR	WT	-2.81591	2.48508e-11	7.16311e-10	AT3G13080	ABC transporter C family member 3
BnaA03g13450D	CR	WT	-2.81444	6.67143e-05	0.000625216	AT5G50915	Transcription factor bHLH137
BnaA02g17410D	CR	WT	-2.80832	1.89284e-19	1.2005e-17	AT1G75710	C2H2-like zinc finger protein
BnaC02g25500D	CR	WT	-2.80763	7.53941e-06	8.95229e-05	/	/
BnaA10g10270D	CR	WT	-2.80703	6.3722e-13	2.24165e-11	AT5G56120	Unknown protein
BnaC01g18970D	CR	WT	-2.80613	1.09679e-10	2.94283e-09	AT4G26760	65-kDa microtubule-associated protein 2
BnaA06g31190D	CR	WT	-2.80594	1.31195e-25	1.27259e-23	AT5G48600	Structural maintenance of chromosomes protein 4
BnaC04g40810D	CR	WT	-2.80468	4.10859e-06	5.15705e-05	AT2G30020	Probable protein phosphatase 2C 25
BnaA09g05560D	CR	WT	-2.80038	3.1135e-19	1.94968e-17	AT5G61000	Replication protein A 70 kDa DNA-binding subunit D
BnaA09g52610D	CR	WT	-2.80018	8.10747e-07	1.18224e-05	AT5G66750	ATP-dependent DNA helicase DDM1
BnaC09g41200D	CR	WT	-2.79938	2.28738e-08	4.37532e-07	AT5G16690	Origin of replication complex subunit 3
BnaC04g27870D	CR	WT	-2.79799	6.51516e-12	2.03508e-10	AT3G52770	protein binding
BnaC05g39470D	CR	WT	-2.79532	0.0184969	0.0700712	AT3G14210	GDSL esterase/lipase ESM1
BnaA03g14870D	CR	WT	-2.79528	0.0262864	0.0915687	AT2G32280	Protein of unknown function (DUF1218)
BnaA02g03390D	CR	WT	-2.79458	0.0322696	0.106612	AT5G17160	Unknown protein
BnaAnng28000D	CR	WT	-2.78832	1.08173e-15	5.01884e-14	/	/
BnaC07g32190D	CR	WT	-2.78548	3.69064e-16	1.77043e-14	AT3G51330	Eukaryotic aspartyl protease family protein
BnaA01g05020D	CR	WT	-2.78463	6.46448e-25	5.97753e-23	AT4G31840	early nodulin-like protein 15
BnaC01g25420D	CR	WT	-2.78353	0.00425817	0.0217756	AT3G48540	Cytidine/deoxycytidylate deaminase family protein
BnaA06g08850D	CR	WT	-2.78345	0.000443712	0.00324111	AT1G13830	Carbohydrate-binding X8 domain superfamily protein
BnaC03g75370D	CR	WT	-2.78014	0.00178363	0.0106037	AT1G30510	Ferredoxin--NADP reductase%2C root isozyme 2%2C chloroplastic
BnaA02g05170D	CR	WT	-2.77869	5.8339e-05	0.00055621	AT5G20960	Indole-3-acetaldehyde oxidase
BnaC05g10740D	CR	WT	-2.7782	6.31724e-08	1.13487e-06	AT1G14460	Protein STICHEL-like 1
BnaA03g22490D	CR	WT	-2.77744	1.19513e-08	2.3852e-07	AT5G22110	DNA polymerase epsilon subunit B2
BnaA02g03470D	CR	WT	-2.77532	0.00333064	0.017791	AT1G44110	Cyclin-A1-1
BnaC02g19120D	CR	WT	-2.77506	8.92219e-05	0.000808575	AT1G54980	Plant invertase/pectin methylesterase inhibitor superfamily protein
BnaA07g15580D	CR	WT	-2.77493	1.51975e-05	0.000168381	AT5G41960	Unknown protein
BnaA09g52500D	CR	WT	-2.77358	0.00208131	0.0120706	AT5G65410	Zinc-finger homeodomain protein 1
BnaA09g41080D	CR	WT	-2.77267	3.80298e-35	6.57235e-33	AT2G25060	Early nodulin-like protein 1
BnaAnng09400D	CR	WT	-2.77078	5.4409e-39	1.23752e-36	AT3G13280	Putative endonuclease or glycosyl hydrolase
BnaA09g25800D	CR	WT	-2.77062	1.72316e-08	3.36436e-07	AT3G12230	Serine carboxypeptidase-like 14
BnaC03g67870D	CR	WT	-2.76813	8.31408e-05	0.000758975	AT4G30860	Histone-lysine N-methyltransferase ASHR3
BnaC08g06060D	CR	WT	-2.76791	0.00184704	0.0109151	AT1G22640	Transcription factor MYB3
BnaC07g43850D	CR	WT	-2.76564	1.10437e-05	0.000126576	AT4G32551	Transcriptional corepressor LEUNIG
BnaC05g40980D	CR	WT	-2.76514	5.04102e-34	8.17637e-32	AT3G12110	Actin-11
BnaC03g49640D	CR	WT	-2.76283	7.92996e-10	1.89744e-08	AT5G64630	Chromatin assembly factor 1 subunit FAS2
BnaC08g43670D	CR	WT	-2.76202	1.21856e-09	2.84016e-08	AT1G04020	BRCA1-associated RING domain protein 1
BnaC05g11110D	CR	WT	-2.76005	3.34435e-07	5.28578e-06	AT1G80130	Tetratricopeptide repeat (TPR)-like superfamily protein
BnaA02g20030D	CR	WT	-2.75888	0.00112114	0.00715094	AT1G80120	Protein LURP-one-related 5
BnaC06g18710D	CR	WT	-2.75492	0.000788078	0.00530709	AT1G21310	Extensin-3
BnaC03g74680D	CR	WT	-2.75484	1.58005e-13	6.0127e-12	AT5G63550	DEK domain-containing chromatin associated protein
BnaA10g12840D	CR	WT	-2.75239	4.35615e-35	7.46316e-33	AT5G59870	Probable histone H2A.7
BnaC03g50310D	CR	WT	-2.74888	2.34231e-20	1.57117e-18	AT5G63950	Protein CHROMATIN REMODELING 24
BnaA05g05340D	CR	WT	-2.7483	9.40337e-12	2.8804e-10	AT2G46070	Mitogen-activated protein kinase 12
BnaC07g17620D	CR	WT	-2.74719	5.89893e-08	1.06407e-06	AT5G44040	Unknown protein
BnaA02g24130D	CR	WT	-2.74296	0.00363933	0.0191097	AT5G45890	Senescence-specific cysteine protease SAG12
BnaC09g16750D	CR	WT	-2.73736	1.81282e-05	0.000197316	AT2G17300	Unknown protein
BnaA02g02940D	CR	WT	-2.73312	3.59411e-06	4.56631e-05	AT5G16030	Unknown protein
BnaCnng22370D	CR	WT	-2.73082	5.40014e-11	1.50398e-09	AT2G14890	Classical arabinogalactan protein 9
BnaCnng67210D	CR	WT	-2.72817	5.41989e-26	5.43032e-24	AT1G63100	Scarecrow-like protein 28
BnaC09g07810D	CR	WT	-2.72479	1.22859e-07	2.09761e-06	AT5G66750	ATP-dependent DNA helicase DDM1
BnaCnng27390D	CR	WT	-2.72383	8.68384e-61	5.54309e-58	AT1G54010	Inactive GDSL esterase/lipase-like protein 23
BnaC09g23000D	CR	WT	-2.72199	2.86912e-25	2.72642e-23	AT4G05520	EH domain-containing protein 2
BnaC06g24550D	CR	WT	-2.71794	2.95488e-15	1.32437e-13	AT1G70710	Endoglucanase 8
BnaC07g40670D	CR	WT	-2.71497	3.35442e-06	4.28517e-05	/	/
BnaC01g36030D	CR	WT	-2.71062	0.00402831	0.0208138	AT3G15540	Auxin-responsive protein IAA19
BnaA01g18040D	CR	WT	-2.71042	2.19944e-11	6.38628e-10	AT4G17000	Unknown protein
BnaC03g07650D	CR	WT	-2.70793	5.19782e-30	6.92623e-28	AT5G16250	Unknown protein
BnaA09g37270D	CR	WT	-2.70724	0.0149614	0.0593241	AT3G58120	Basic leucine zipper 61
BnaC05g00710D	CR	WT	-2.70585	0.00745505	0.0342275	AT1G01200	Ras-related protein RABA3
BnaA09g19860D	CR	WT	-2.70252	0.000118639	0.0010342	AT4G05190	Kinesin-5
BnaA03g14370D	CR	WT	-2.70126	5.85547e-08	1.05767e-06	AT2G31270	CDT1-like protein a%2C chloroplastic
BnaC06g34860D	CR	WT	-2.69819	0.000772079	0.00522232	AT1G74000	Protein STRICTOSIDINE SYNTHASE-LIKE 11
BnaA06g23430D	CR	WT	-2.69566	3.76471e-25	3.54743e-23	AT5G64310	Classical arabinogalactan protein 1
BnaC07g17600D	CR	WT	-2.69486	9.52952e-05	0.000854225	AT5G44020	HAD superfamily%2C subfamily IIIB acid phosphatase
BnaA06g38430D	CR	WT	-2.69469	2.84515e-06	3.70271e-05	AT1G17140	Interactor of constitutive active ROPs 1
BnaC01g06600D	CR	WT	-2.69429	2.1498e-24	1.89912e-22	AT4G31840	early nodulin-like protein 15
BnaA05g06960D	CR	WT	-2.69308	4.90292e-06	6.05233e-05	AT2G37560	Origin of replication complex subunit 2
BnaA06g40310D	CR	WT	-2.69132	0.000537726	0.00381517	AT5G46740	Ubiquitin carboxyl-terminal hydrolase 21
BnaCnng54470D	CR	WT	-2.68947	0.000586479	0.00411753	AT4G11080	High mobility group B protein 13
BnaC09g46410D	CR	WT	-2.68769	2.30063e-28	2.7179e-26	AT5G10220	Annexin D6
BnaC01g09320D	CR	WT	-2.68455	0.000544968	0.00386171	AT4G29140	MATE efflux family protein
BnaA09g34410D	CR	WT	-2.68187	4.54746e-16	2.16051e-14	AT3G54560	Histone H2A variant 1
BnaA01g33380D	CR	WT	-2.67912	2.26203e-08	4.32891e-07	AT3G05040	Protein HASTY 1
BnaC05g35900D	CR	WT	-2.67412	0.000281333	0.00218571	AT3G17640	Leucine-rich repeat (LRR) family protein
BnaC05g50940D	CR	WT	-2.67319	7.44049e-06	8.85076e-05	AT1G26840	Origin of replication complex subunit 6
BnaC08g37470D	CR	WT	-2.67285	4.63581e-09	9.91177e-08	AT5G26830	Threonine--tRNA ligase%2C mitochondrial
BnaC04g08770D	CR	WT	-2.66712	0.03041	0.102084	AT2G36540	Haloacid dehalogenase-like hydrolase (HAD) superfamily protein
BnaA10g21870D	CR	WT	-2.66555	2.18585e-44	6.8116e-42	AT5G10400	Histone H3.2
BnaA10g07120D	CR	WT	-2.66503	2.9503e-08	5.55741e-07	AT5G53870	early nodulin-like protein 1
BnaA03g11520D	CR	WT	-2.66361	1.87238e-33	2.97595e-31	AT5G55180	O-Glycosyl hydrolases family 17 protein
BnaA03g46560D	CR	WT	-2.66249	0.00554048	0.0269704	AT4G24250	MLO-like protein 13
BnaC06g19410D	CR	WT	-2.66245	4.66086e-06	5.78602e-05	AT1G80670	Protein RAE1
BnaC06g37380D	CR	WT	-2.662	2.1885e-14	9.03148e-13	AT1G76540	Cyclin-dependent kinase B2-1
BnaC06g37050D	CR	WT	-2.65264	1.0924e-15	5.06237e-14	AT1G76310	Cyclin-B2-4
BnaA03g25800D	CR	WT	-2.65146	7.23268e-10	1.74006e-08	AT1G65670	cytochrome P450%2C family 702%2C subfamily A%2C polypeptide 1
BnaA01g08490D	CR	WT	-2.65114	8.87141e-14	3.45226e-12	AT2G07170	ARM repeat superfamily protein
BnaCnng23000D	CR	WT	-2.65094	4.19764e-08	7.73397e-07	AT3G12170	Chaperone DnaJ-domain superfamily protein
BnaA01g05060D	CR	WT	-2.64864	0.0104425	0.0449262	AT4G31800	WRKY transcription factor 18
BnaA05g24370D	CR	WT	-2.6481	0.00024903	0.00196719	AT3G15240	Serine/threonine-protein kinase WNK (With No Lysine)-related
BnaA09g49520D	CR	WT	-2.64573	8.69826e-07	1.25774e-05	AT1G07370	Proliferating cellular nuclear antigen 1
BnaC03g12660D	CR	WT	-2.64387	4.9079e-31	6.93696e-29	AT5G57920	early nodulin-like protein 10
BnaA01g04120D	CR	WT	-2.64292	5.91161e-19	3.59031e-17	AT4G32830	Serine/threonine-protein kinase Aurora-1
BnaC08g20440D	CR	WT	-2.64148	6.21237e-35	1.0552e-32	AT3G48740	Bidirectional sugar transporter SWEET11
BnaC02g41640D	CR	WT	-2.63689	3.87449e-05	0.000386628	AT5G23420	High mobility group B protein 7
BnaC04g26190D	CR	WT	-2.63591	7.96968e-20	5.15372e-18	AT3G54560	Histone H2A variant 1
BnaC01g28160D	CR	WT	-2.63507	1.70491e-05	0.000186701	AT1G58520	CSC1-like protein RXW8
BnaA02g34140D	CR	WT	-2.629	6.28199e-14	2.48368e-12	AT5G64310	Classical arabinogalactan protein 1
BnaC03g16920D	CR	WT	-2.62725	0.0136558	0.0553957	AT2G41910	Protein kinase superfamily protein
BnaA08g26360D	CR	WT	-2.62558	0.000490808	0.00352975	AT1G09450	Protein kinase superfamily protein
BnaA05g33320D	CR	WT	-2.62547	2.5679e-05	0.000270501	AT3G02820	zinc knuckle (CCHC-type) family protein
BnaA07g11450D	CR	WT	-2.62454	1.08188e-26	1.13572e-24	AT1G20450	Dehydrin ERD10
BnaA09g26390D	CR	WT	-2.62202	6.28194e-05	0.000594202	AT1G30135	Protein TIFY 5A
BnaA10g29800D	CR	WT	-2.62182	0.0110055	0.0467437	AT5G13750	Protein ZINC INDUCED FACILITATOR-LIKE 1
BnaC02g21760D	CR	WT	-2.61786	0.000760046	0.00515591	AT1G73050	Suberin Synthesis & Transport 1; (R)-mandelonitrile lyase-like
BnaA04g11460D	CR	WT	-2.61736	6.60861e-10	1.59965e-08	AT5G41880	DNA primases%3BDNA primases
BnaC04g45100D	CR	WT	-2.61623	6.93138e-05	0.00064682	AT2G37370	Unknown protein
BnaC05g15780D	CR	WT	-2.61445	4.28847e-26	4.3296e-24	AT1G20450	Dehydrin ERD10
BnaA10g04350D	CR	WT	-2.61131	1.23669e-05	0.000140198	AT1G06660	Protein JASON
BnaAnng08320D	CR	WT	-2.61078	5.96474e-05	0.000567726	AT4G35930	F-box protein At4g35930
BnaCnng11880D	CR	WT	-2.61059	8.25118e-10	1.97072e-08	AT1G60960	Fe(2+) transport protein 3%2C chloroplastic
BnaA04g26650D	CR	WT	-2.60971	2.86821e-08	5.41825e-07	AT2G46070	Mitogen-activated protein kinase 12
BnaC03g54120D	CR	WT	-2.60811	0.014738	0.0586203	AT4G13020	Serine/threonine-protein kinase MHK
BnaA10g18070D	CR	WT	-2.60081	3.40125e-21	2.40801e-19	AT5G16250	Unknown protein
BnaC05g43310D	CR	WT	-2.59956	0.000399536	0.00296383	AT3G09660	minichromosome maintenance 8
BnaA07g26280D	CR	WT	-2.59889	2.8667e-09	6.3845e-08	AT1G67780	Zinc-finger domain of monoamine-oxidase A repressor R1 protein
BnaA03g04530D	CR	WT	-2.59774	6.56202e-13	2.30638e-11	AT5G13840	Protein FIZZY-RELATED 3
BnaA01g19550D	CR	WT	-2.5963	3.06292e-06	3.95234e-05	AT3G51230	Unknown protein
BnaA03g57880D	CR	WT	-2.59232	0.0215318	0.0787708	AT2G04040	MATE efflux family protein DTX1
BnaC09g45170D	CR	WT	-2.58995	0.000268518	0.00210059	AT5G11420	Protein of unknown function%2C DUF642
BnaC04g45150D	CR	WT	-2.58955	0.00167985	0.0100883	AT2G37420	ATP binding microtubule motor family protein
BnaA07g16710D	CR	WT	-2.58929	4.39211e-28	5.08252e-26	AT3G56090	Ferritin-3%2C chloroplastic
BnaC09g02450D	CR	WT	-2.58898	4.03865e-14	1.62103e-12	AT5G48460	Fimbrin-2
BnaC06g33960D	CR	WT	-2.58863	0.0209196	0.0770656	AT1G72830	Nuclear transcription factor Y subunit A-3
BnaC05g51200D	CR	WT	-2.58477	7.8565e-15	3.35776e-13	AT1G50490	Ubiquitin-conjugating enzyme E2 20
BnaA03g41720D	CR	WT	-2.5817	0.00406775	0.0209616	AT3G52270	Transcription initiation factor IIF%2C beta subunit
BnaA09g03040D	CR	WT	-2.57752	8.60602e-08	1.50838e-06	AT5G48460	Fimbrin-2
BnaC03g41430D	CR	WT	-2.5763	8.16442e-09	1.66726e-07	AT3G20150	Kinesin motor family protein
BnaC02g12920D	CR	WT	-2.57501	0.000188765	0.00155152	AT5G55590	Pectinesterase QRT1
BnaCnng36630D	CR	WT	-2.57236	2.06154e-07	3.38915e-06	AT3G52110	Unknown protein
BnaA08g05900D	CR	WT	-2.5661	0.00433823	0.022088	AT4G15830	ARM repeat superfamily protein
BnaC04g40520D	CR	WT	-2.56573	0.00105714	0.00680173	AT2G29420	Glutathione S-transferase U7
BnaC04g41470D	CR	WT	-2.56457	0.00027685	0.00215469	AT2G30820	Unknown protein
BnaC03g49470D	CR	WT	-2.56384	0.00198883	0.0116332	AT5G64810	Probable WRKY transcription factor 51
BnaC02g08040D	CR	WT	-2.56325	0.0069875	0.0324879	AT5G18430	GDSL esterase/lipase At5g18430
BnaCnng51820D	CR	WT	-2.56238	1.06875e-05	0.000122671	AT3G18010	WUSCHEL-related homeobox 1
BnaC03g73200D	CR	WT	-2.56197	6.62436e-05	0.00062154	AT4G02380	senescence-associated gene 21
BnaA05g20240D	CR	WT	-2.55909	1.51945e-17	8.35193e-16	AT3G20670	Probable histone H2A.2
BnaC03g31160D	CR	WT	-2.5589	1.10061e-24	9.96748e-23	AT4G02060	DNA replication licensing factor MCM7
BnaC05g45800D	CR	WT	-2.55697	1.75973e-10	4.59994e-09	AT3G06030	Mitogen-activated protein kinase kinase kinase 3
BnaC06g07230D	CR	WT	-2.55636	3.76131e-12	1.20435e-10	AT1G55330	Arabinogalactan peptide 21
BnaA03g18620D	CR	WT	-2.5561	0.00327282	0.0175318	AT2G39435	Phosphatidylinositol N-acetyglucosaminlytransferase subunit P-related
BnaC04g24880D	CR	WT	-2.55552	0.000781003	0.00526918	AT3G56760	CDPK-related kinase 7
BnaA08g17240D	CR	WT	-2.55409	0.0110867	0.0469872	AT4G14310	Transducin/WD40 repeat-like superfamily protein
BnaC04g36350D	CR	WT	-2.55356	2.62628e-17	1.40783e-15	AT2G24490	Replication protein A 32 kDa subunit A
BnaC09g06910D	CR	WT	-2.55284	4.38157e-53	1.97051e-50	AT5G65360	Histone H3.2
BnaCnng06690D	CR	WT	-2.55045	2.25318e-24	1.9816e-22	AT1G09200	Histone H3.2
BnaC01g03230D	CR	WT	-2.54869	6.20527e-13	2.18682e-11	AT4G35320	Unknown protein
BnaC02g36630D	CR	WT	-2.54744	7.4343e-27	7.97344e-25	AT3G27060	Ribonucleoside-diphosphate reductase small chain C
BnaA09g49670D	CR	WT	-2.54454	0.000795879	0.00535038	AT1G06870	Probable thylakoidal processing peptidase 2%2C chloroplastic
BnaC02g07160D	CR	WT	-2.54211	0.00528308	0.0259505	AT1G44110	Cyclin-A1-1
BnaA03g22120D	CR	WT	-2.53814	2.47591e-06	3.26405e-05	AT5G55270	Protein of unknown function (DUF295)
BnaC05g06970D	CR	WT	-2.53779	6.72766e-07	9.99452e-06	AT1G09380	WAT1-related protein At1g09380
BnaA09g53380D	CR	WT	-2.53653	6.91379e-44	2.05729e-41	AT5G65360	Histone H3.2
BnaA10g06340D	CR	WT	-2.53289	4.35223e-14	1.74159e-12	AT5G52910	timeless family protein
BnaA05g00920D	CR	WT	-2.53179	0.0298986	0.100874	AT2G46970	Transcription factor PIL1
BnaC06g07060D	CR	WT	-2.52909	0.00184457	0.0109038	AT1G54270	Eukaryotic initiation factor 4A-2
BnaA07g22510D	CR	WT	-2.51989	0.00358663	0.0188706	AT1G73805	Protein SAR DEFICIENT 1
BnaC08g10450D	CR	WT	-2.51988	0.00172929	0.0103303	AT4G15830	ARM repeat superfamily protein
BnaA09g32570D	CR	WT	-2.51873	1.14977e-11	3.49486e-10	AT3G52110	Unknown protein
BnaA04g26930D	CR	WT	-2.51805	0.00253643	0.0141839	AT2G47180	Galactinol synthase 1
BnaA07g31920D	CR	WT	-2.51669	1.61378e-07	2.69505e-06	AT1G75150	Unknown protein
BnaC03g36850D	CR	WT	-2.51649	1.67617e-06	2.28352e-05	AT3G10780	Transmembrane emp24 domain-containing protein p24delta6
BnaA07g36150D	CR	WT	-2.51494	0.000158222	0.00133022	AT2G04045	Defensin-like protein 295
BnaA02g28570D	CR	WT	-2.51389	4.78828e-17	2.48689e-15	AT3G27060	Ribonucleoside-diphosphate reductase small chain C
BnaA05g07130D	CR	WT	-2.51232	2.87644e-05	0.00029918	AT2G37380	Probable membrane-associated kinase regulator 3
BnaC08g30620D	CR	WT	-2.50971	0.000473247	0.00342461	AT3G60450	Phosphoglycerate mutase family protein
BnaA07g17770D	CR	WT	-2.50924	2.33825e-06	3.09908e-05	AT1G56170	Nuclear transcription factor Y subunit C-2
BnaA04g03930D	CR	WT	-2.50705	2.6568e-23	2.21826e-21	AT3G54750	Unknown protein
BnaA03g44890D	CR	WT	-2.50434	6.79843e-19	4.10144e-17	AT4G21760	Beta-glucosidase 47
BnaC09g07360D	CR	WT	-2.49942	0.00946526	0.0415434	AT5G67270	Microtubule-associated protein RP/EB family member 1C
BnaC05g06210D	CR	WT	-2.4993	4.15054e-34	6.78768e-32	AT1G08560	Syntaxin-related protein KNOLLE
BnaC04g46630D	CR	WT	-2.49811	3.97579e-05	0.000395839	AT2G39800	Delta-1-pyrroline-5-carboxylate synthase A
BnaA04g23340D	CR	WT	-2.49298	1.26972e-14	5.32877e-13	AT2G40550	Mini-chromosome maintenance complex-binding protein
BnaA03g40990D	CR	WT	-2.49254	0.0163182	0.0636231	AT3G50830	Cold-regulated 413 plasma membrane protein 2
BnaA05g33690D	CR	WT	-2.4921	0.00740782	0.0340304	AT3G01690	alpha/beta-Hydrolases superfamily protein
BnaUnng00250D	CR	WT	-2.49085	1.4929e-08	2.94678e-07	AT5G41880	DNA primases%3BDNA primases
BnaA07g15180D	CR	WT	-2.49049	0.00267278	0.014819	AT5G40890	Chloride channel protein CLC-a
BnaC04g11090D	CR	WT	-2.48186	0.000304296	0.0023375	AT2G33400	Unknown protein
BnaA07g32850D	CR	WT	-2.47724	0.000818938	0.00547997	AT1G76540	Cyclin-dependent kinase B2-1
BnaA04g21820D	CR	WT	-2.47406	0.00279132	0.0153174	AT2G38090	Duplicated homeodomain-like superfamily protein
BnaA01g27340D	CR	WT	-2.46792	0.000152252	0.00128916	AT3G17140	Plant invertase/pectin methylesterase inhibitor superfamily protein
BnaA09g07480D	CR	WT	-2.46499	1.09227e-08	2.19653e-07	AT5G67270	Microtubule-associated protein RP/EB family member 1C
BnaC08g12880D	CR	WT	-2.46282	4.56133e-07	7.03504e-06	AT4G28140	Ethylene-responsive transcription factor ERF054
BnaC09g04020D	CR	WT	-2.46258	0.000459376	0.00333521	AT5G25380	cyclin a2%3B1
BnaC02g20100D	CR	WT	-2.4625	0.00125005	0.00784274	AT1G70670	CALO; Caleosin; Triacylglycerol Biosynthesis; Probable peroxygenase 4
BnaC01g10100D	CR	WT	-2.46204	5.71614e-05	0.000546166	AT4G17500	Ethylene-responsive transcription factor 1A
BnaAnng01620D	CR	WT	-2.46102	4.29615e-21	3.00396e-19	AT5G06140	Sorting nexin 1
BnaC04g30760D	CR	WT	-2.46102	0.000193514	0.00158397	AT5G38300	Unknown protein
BnaA06g00550D	CR	WT	-2.45898	4.0038e-06	5.0319e-05	AT1G54270	Eukaryotic initiation factor 4A-2
BnaA09g19380D	CR	WT	-2.45838	1.61802e-05	0.00017822	AT4G12960	Gamma interferon responsive lysosomal thiol (GILT) reductase family protein
BnaA02g29530D	CR	WT	-2.45736	0.00386733	0.0200812	AT3G28940	AIG2-like (avirulence induced gene) family protein
BnaA09g19130D	CR	WT	-2.45492	0.0113714	0.0479065	AT2G02750	Pentatricopeptide repeat-containing protein At2g02750
BnaC04g27780D	CR	WT	-2.45366	1.96462e-39	4.60071e-37	AT3G52840	Beta-galactosidase 2
BnaCnng18290D	CR	WT	-2.45289	1.99327e-10	5.17282e-09	AT3G03050	Cellulose synthase-like protein D3
BnaA10g05770D	CR	WT	-2.45163	7.09215e-14	2.78451e-12	/	/
BnaA03g39790D	CR	WT	-2.44949	0.0177755	0.0678498	AT5G60890	Transcription factor MYB34
BnaAnng10090D	CR	WT	-2.44747	8.02869e-17	4.09992e-15	AT5G44480	Putative UDP-arabinose 4-epimerase 4
BnaA02g03610D	CR	WT	-2.44502	0.000110561	0.000972992	AT5G17450	Heavy metal transport/detoxification superfamily protein
BnaA02g06910D	CR	WT	-2.44373	1.09382e-18	6.47069e-17	AT5G59690	Histone H4
BnaA09g04390D	CR	WT	-2.44334	0.000292281	0.00225792	AT5G11950	Cytokinin riboside 5'-monophosphate phosphoribohydrolase LOG8
BnaA10g17810D	CR	WT	-2.44292	0.000261026	0.00204927	AT5G16690	Origin of replication complex subunit 3
BnaC04g09130D	CR	WT	-2.44254	1.00965e-17	5.6678e-16	AT2G36200	Probable 125 kDa kinesin-related protein
BnaCnng77840D	CR	WT	-2.44231	0.00867752	0.0387784	AT4G15755	Calcium-dependent lipid-binding (CaLB domain) family protein
BnaA04g16160D	CR	WT	-2.44195	7.11867e-07	1.05162e-05	AT2G27970	Cyclin-dependent kinases regulatory subunit 2
BnaC03g25860D	CR	WT	-2.44052	0.000175954	0.00146017	AT2G46530	Auxin response factor 11
BnaC03g10310D	CR	WT	-2.4384	0.00582125	0.0280646	AT5G20850	DNA repair protein RAD51 homolog 1
BnaA09g50230D	CR	WT	-2.43749	0.000183639	0.00151568	AT1G05730	Eukaryotic protein of unknown function (DUF842)
BnaA08g12000D	CR	WT	-2.4374	1.51936e-12	5.15697e-11	AT4G32830	Serine/threonine-protein kinase Aurora-1
BnaA05g31340D	CR	WT	-2.43668	5.00047e-10	1.22766e-08	AT3G05970	LACS; Long-Chain Acyl-CoA Synthetase; Triacylglycerol & Fatty Acid Degradation; LACS6; Long chain acyl-CoA synthetase 6%2C peroxisomal
BnaA09g04560D	CR	WT	-2.43548	0.00968118	0.0422661	AT1G65550	Putative nucleobase-ascorbate transporter 10
BnaC04g04740D	CR	WT	-2.43397	2.83479e-09	6.31698e-08	AT2G46070	Mitogen-activated protein kinase 12
BnaA05g28490D	CR	WT	-2.4334	7.42901e-11	2.02766e-09	AT3G10310	P-loop nucleoside triphosphate hydrolases superfamily protein with CH (Calponin Homology) domain
BnaC08g28250D	CR	WT	-2.43275	1.78963e-06	2.42556e-05	AT3G57330	Putative calcium-transporting ATPase 11%2C plasma membrane-type
BnaC06g25760D	CR	WT	-2.43139	0.000485122	0.00349457	AT1G68585	Unknown protein
BnaC01g22560D	CR	WT	-2.43036	3.04435e-18	1.75121e-16	AT1G10190	Protein of Unknown Function (DUF239)
BnaA10g19110D	CR	WT	-2.42911	1.3974e-06	1.93167e-05	AT5G14730	Unknown protein
BnaA02g00270D	CR	WT	-2.42877	0.00729758	0.0336372	AT5G09960	Unknown protein
BnaC09g46260D	CR	WT	-2.42806	1.0264e-46	3.59476e-44	AT5G10400	Histone H3.2
BnaCnng40390D	CR	WT	-2.42365	1.07141e-14	4.53499e-13	AT5G02370	ATP binding microtubule motor family protein
BnaA05g11560D	CR	WT	-2.42232	4.88155e-14	1.94554e-12	AT2G31270	CDT1-like protein a%2C chloroplastic
BnaA03g16490D	CR	WT	-2.42203	0.0109847	0.0466829	AT2G36010	Transcription factor E2FA
BnaA06g36070D	CR	WT	-2.42189	7.70394e-15	3.30326e-13	AT5G46280	DNA replication licensing factor MCM3
BnaA03g40220D	CR	WT	-2.42134	0.00365093	0.0191605	AT5G51870	AGAMOUS-like 71
BnaCnng53490D	CR	WT	-2.41993	0.0121448	0.0504769	/	/
BnaA05g15820D	CR	WT	-2.41656	0.00118858	0.00751308	AT1G50490	Ubiquitin-conjugating enzyme E2 20
BnaA08g13750D	CR	WT	-2.41581	6.13735e-46	2.076e-43	AT4G32490	early nodulin-like protein 4
BnaA08g13950D	CR	WT	-2.4156	0.000435286	0.00319016	AT5G53200	Transcription factor TRY
BnaA03g23160D	CR	WT	-2.41497	9.397e-07	1.35137e-05	AT2G20980	minichromosome maintenance 10
BnaC09g19170D	CR	WT	-2.41215	0.000840048	0.00559128	AT5G46160	50S ribosomal protein HLP%2C mitochondrial
BnaC03g11480D	CR	WT	-2.41034	1.18222e-34	1.99096e-32	AT5G22880	Histone H2B.10
BnaA09g05100D	CR	WT	-2.4085	4.21056e-09	9.086e-08	AT5G23910	ATP binding microtubule motor family protein
BnaA02g32890D	CR	WT	-2.4074	0.00652832	0.0307175	AT5G23420	High mobility group B protein 7
BnaAnng00800D	CR	WT	-2.40655	6.23079e-34	1.00649e-31	AT5G03820	GDSL esterase/lipase At5g03820
BnaC06g30160D	CR	WT	-2.40141	7.96133e-32	1.15413e-29	AT3G45940	Putative alpha-xylosidase 2
BnaC04g14780D	CR	WT	-2.39917	7.36318e-05	0.000683087	AT2G05050	Protein phosphatase 2C family protein
BnaA02g28850D	CR	WT	-2.3991	0.00449314	0.02278	AT3G27330	zinc finger (C3HC4-type RING finger) family protein
BnaC09g39310D	CR	WT	-2.39828	5.96291e-06	7.25225e-05	AT5G18460	Protein of Unknown Function (DUF239)
BnaC05g19030D	CR	WT	-2.39498	1.14569e-05	0.000130857	AT1G23880	NHL domain-containing protein
BnaC09g50170D	CR	WT	-2.39454	0.000406884	0.00301169	AT5G05130	DNA/RNA helicase protein
BnaA02g22480D	CR	WT	-2.39341	0.00153541	0.00934997	AT5G44070	Glutathione gamma-glutamylcysteinyltransferase 1
BnaC05g04880D	CR	WT	-2.39285	0.00200277	0.0116939	AT1G07060	Unknown protein
BnaC06g26680D	CR	WT	-2.39208	1.69521e-28	2.03302e-26	AT1G57820	E3 ubiquitin-protein ligase ORTHRUS 2
BnaA04g05260D	CR	WT	-2.39072	6.98905e-12	2.1694e-10	AT3G52770	protein binding
BnaC08g37310D	CR	WT	-2.38817	0.0110079	0.0467481	AT1G18370	Kinesin-like protein NACK1
BnaA09g25130D	CR	WT	-2.38781	2.8072e-05	0.000292979	AT2G37340	Serine/arginine-rich splicing factor RS2Z33
BnaA02g28330D	CR	WT	-2.38713	0.000785371	0.00529233	AT3G26820	Esterase/lipase/thioesterase family protein
BnaC09g25410D	CR	WT	-2.38642	0.000207241	0.00167794	AT4G08700	Probable purine permease 13
BnaC05g46440D	CR	WT	-2.38575	9.61321e-07	1.37945e-05	AT3G05330	Probable microtubule-binding protein TANGLED
BnaC02g44320D	CR	WT	-2.38526	0.000245674	0.00194339	AT5G59690	Histone H4
BnaC07g48980D	CR	WT	-2.3842	3.50348e-17	1.85614e-15	AT3G27060	Ribonucleoside-diphosphate reductase small chain C
BnaA08g04850D	CR	WT	-2.38368	0.00731375	0.0336921	AT5G41130	Esterase/lipase/thioesterase family protein
BnaC06g40700D	CR	WT	-2.38327	4.82058e-24	4.16549e-22	AT1G80130	Tetratricopeptide repeat (TPR)-like superfamily protein
BnaA08g20370D	CR	WT	-2.38327	0.0024132	0.0136163	AT1G23580	Domain of unknown function DUF220
BnaAnng30770D	CR	WT	-2.38186	0.0155477	0.0611586	AT3G48540	Cytidine/deoxycytidylate deaminase family protein
[truncated: 4,394 more rows]

[truncated: 1 more sheets: ST11]
